# Supplementary material for: Testing a Recent DEMATEL-Based Proposal to Simplify the Use of ANP
Source: MDPI journal article supplement (doi:10.3390/math9141605), 2021-07-07
Supplement: s1 [file s1]

## Supplementary Material

Table S1. Case 2. Original Weighted Supermatrix and Priorities.

|     | E1    | E2    | E3    | E4    | E5    | E6    | E7    | E8    | E9    | E10   | E11   | E12   | E13   | E14   | E15   | E16   | E17   | E18   | E19   | Priorities |
|-----|-------|-------|-------|-------|-------|-------|-------|-------|-------|-------|-------|-------|-------|-------|-------|-------|-------|-------|-------|------------|
| E1  | 0.000 | 0.000 | 0.074 | 0.000 | 0.000 | 0.000 | 0.000 | 0.000 | 0.000 | 0.000 | 0.185 | 0.080 | 0.094 | 0.000 | 0.065 | 0.148 | 0.078 | 0.053 | 0.081 | 0.042      |
| E2  | 0.000 | 0.000 | 0.417 | 1.000 | 0.062 | 0.000 | 0.000 | 0.000 | 0.000 | 0.000 | 0.000 | 0.000 | 0.020 | 0.000 | 0.020 | 0.045 | 0.000 | 0.127 | 0.021 | 0.023      |
| E3  | 0.000 | 0.250 | 0.000 | 0.000 | 0.187 | 0.000 | 0.000 | 0.000 | 0.000 | 0.000 | 0.000 | 0.000 | 0.000 | 0.000 | 0.000 | 0.000 | 0.024 | 0.033 | 0.011 | 0.010      |
| E4  | 0.000 | 0.083 | 0.117 | 0.000 | 0.187 | 0.000 | 0.000 | 0.000 | 0.000 | 0.000 | 0.031 | 0.000 | 0.007 | 0.000 | 0.000 | 0.000 | 0.000 | 0.015 | 0.005 | 0.009      |
| E5  | 0.000 | 0.083 | 0.099 | 0.000 | 0.000 | 0.000 | 0.000 | 0.000 | 0.000 | 0.000 | 0.031 | 0.000 | 0.007 | 0.000 | 0.000 | 0.000 | 0.000 | 0.033 | 0.006 | 0.008      |
| E6  | 0.005 | 0.028 | 0.000 | 0.000 | 0.047 | 0.000 | 0.105 | 0.310 | 0.362 | 0.225 | 0.106 | 0.031 | 0.068 | 0.122 | 0.007 | 0.039 | 0.011 | 0.045 | 0.048 | 0.109      |
| E7  | 0.011 | 0.027 | 0.000 | 0.000 | 0.016 | 0.126 | 0.000 | 0.203 | 0.228 | 0.225 | 0.106 | 0.094 | 0.068 | 0.122 | 0.016 | 0.013 | 0.011 | 0.045 | 0.043 | 0.100      |
| E8  | 0.010 | 0.027 | 0.000 | 0.000 | 0.047 | 0.126 | 0.229 | 0.000 | 0.287 | 0.225 | 0.106 | 0.094 | 0.068 | 0.122 | 0.015 | 0.016 | 0.011 | 0.045 | 0.042 | 0.104      |
| E9  | 0.004 | 0.009 | 0.000 | 0.000 | 0.016 | 0.126 | 0.060 | 0.087 | 0.000 | 0.000 | 0.036 | 0.031 | 0.023 | 0.000 | 0.003 | 0.008 | 0.004 | 0.045 | 0.012 | 0.039      |
| E10 | 0.006 | 0.028 | 0.000 | 0.000 | 0.000 | 0.126 | 0.229 | 0.278 | 0.000 | 0.000 | 0.107 | 0.000 | 0.068 | 0.000 | 0.000 | 0.017 | 0.011 | 0.000 | 0.025 | 0.082      |
| E11 | 0.148 | 0.099 | 0.000 | 0.000 | 0.103 | 0.070 | 0.087 | 0.122 | 0.122 | 0.094 | 0.000 | 0.083 | 0.097 | 0.120 | 0.094 | 0.214 | 0.112 | 0.064 | 0.075 | 0.090      |
| E12 | 0.066 | 0.048 | 0.000 | 0.000 | 0.000 | 0.073 | 0.053 | 0.000 | 0.000 | 0.000 | 0.000 | 0.000 | 0.208 | 0.386 | 0.000 | 0.000 | 0.135 | 0.117 | 0.066 | 0.075      |
| E13 | 0.028 | 0.016 | 0.000 | 0.000 | 0.045 | 0.024 | 0.000 | 0.000 | 0.000 | 0.230 | 0.000 | 0.071 | 0.000 | 0.129 | 0.170 | 0.386 | 0.067 | 0.117 | 0.066 | 0.065      |
| E14 | 0.255 | 0.107 | 0.000 | 0.000 | 0.134 | 0.073 | 0.159 | 0.000 | 0.000 | 0.000 | 0.057 | 0.283 | 0.208 | 0.000 | 0.000 | 0.000 | 0.000 | 0.117 | 0.066 | 0.086      |
| E15 | 0.053 | 0.019 | 0.066 | 0.000 | 0.000 | 0.000 | 0.000 | 0.000 | 0.000 | 0.000 | 0.000 | 0.064 | 0.000 | 0.000 | 0.000 | 0.000 | 0.401 | 0.120 | 0.014 | 0.024      |
| E16 | 0.022 | 0.006 | 0.000 | 0.000 | 0.000 | 0.000 | 0.000 | 0.000 | 0.000 | 0.000 | 0.233 | 0.021 | 0.000 | 0.000 | 0.000 | 0.000 | 0.134 | 0.024 | 0.014 | 0.029      |
| E17 | 0.131 | 0.019 | 0.000 | 0.000 | 0.000 | 0.000 | 0.000 | 0.000 | 0.000 | 0.000 | 0.000 | 0.064 | 0.000 | 0.000 | 0.448 | 0.000 | 0.000 | 0.000 | 0.097 | 0.025      |
| E18 | 0.167 | 0.150 | 0.227 | 0.000 | 0.157 | 0.063 | 0.078 | 0.000 | 0.000 | 0.000 | 0.000 | 0.052 | 0.062 | 0.000 | 0.162 | 0.000 | 0.000 | 0.000 | 0.310 | 0.050      |
| E19 | 0.093 | 0.000 | 0.000 | 0.000 | 0.000 | 0.193 | 0.000 | 0.000 | 0.000 | 0.000 | 0.000 | 0.031 | 0.000 | 0.000 | 0.000 | 0.113 | 0.000 | 0.000 | 0.000 | 0.031      |

Table S2. Case 2's X Influence Matrix.

|     | E1 | E2 | E3 | E4 | E5 | E6 | E7 | E8 | E9 | E10 | E11 | E12 | E13 | E14 | E15 | E16 | E17 | E18 | E19 |
|-----|----|----|----|----|----|----|----|----|----|-----|-----|-----|-----|-----|-----|-----|-----|-----|-----|
| E1  | 0  | 0  | 0  | 0  | 0  | 0  | 0  | 0  | 0  | 0   | 3   | 1   | 2   | 0   | 0   | 1   | 0   | 2   | 1   |
| E2  | 0  | 0  | 4  | 4  | 1  | 0  | 0  | 0  | 0  | 0   | 0   | 0   | 0   | 0   | 0   | 0   | 0   | 4   | 0   |
| E3  | 0  | 4  | 0  | 0  | 4  | 0  | 0  | 0  | 0  | 0   | 0   | 0   | 0   | 0   | 0   | 0   | 0   | 1   | 0   |
| E4  | 0  | 1  | 1  | 0  | 4  | 0  | 0  | 0  | 0  | 0   | 0   | 0   | 0   | 0   | 0   | 0   | 0   | 0   | 0   |
| E5  | 0  | 1  | 1  | 0  | 0  | 0  | 0  | 0  | 0  | 0   | 0   | 0   | 0   | 0   | 0   | 0   | 0   | 1   | 0   |
| E6  | 0  | 0  | 0  | 0  | 1  | 0  | 2  | 4  | 4  | 4   | 2   | 0   | 1   | 1   | 0   | 0   | 0   | 1   | 0   |
| E7  | 0  | 0  | 0  | 0  | 0  | 3  | 0  | 3  | 3  | 4   | 2   | 1   | 1   | 1   | 0   | 0   | 0   | 1   | 0   |
| E8  | 0  | 0  | 0  | 0  | 1  | 3  | 4  | 0  | 3  | 4   | 2   | 1   | 1   | 1   | 0   | 0   | 0   | 1   | 0   |
| E9  | 0  | 0  | 0  | 0  | 0  | 3  | 1  | 1  | 0  | 0   | 0   | 0   | 0   | 0   | 0   | 0   | 0   | 1   | 0   |
| E10 | 0  | 0  | 0  | 0  | 0  | 3  | 4  | 4  | 0  | 0   | 2   | 0   | 1   | 0   | 0   | 0   | 0   | 0   | 0   |
| E11 | 2  | 1  | 0  | 0  | 2  | 1  | 1  | 1  | 1  | 2   | 0   | 1   | 2   | 1   | 1   | 2   | 1   | 2   | 1   |
| E12 | 1  | 0  | 0  | 0  | 0  | 1  | 1  | 0  | 0  | 0   | 0   | 0   | 4   | 4   | 0   | 0   | 1   | 4   | 1   |
| E13 | 0  | 0  | 0  | 0  | 1  | 0  | 0  | 0  | 0  | 4   | 0   | 1   | 0   | 1   | 1   | 4   | 0   | 4   | 1   |
| E14 | 4  | 2  | 0  | 0  | 3  | 1  | 3  | 0  | 0  | 0   | 1   | 4   | 4   | 0   | 0   | 0   | 0   | 4   | 1   |
| E15 | 1  | 0  | 0  | 0  | 0  | 0  | 0  | 0  | 0  | 0   | 0   | 1   | 0   | 0   | 0   | 0   | 4   | 4   | 0   |
| E16 | 0  | 0  | 0  | 0  | 0  | 0  | 0  | 0  | 0  | 0   | 4   | 0   | 0   | 0   | 0   | 0   | 1   | 0   | 0   |
| E17 | 2  | 0  | 0  | 0  | 0  | 0  | 0  | 0  | 0  | 0   | 0   | 1   | 0   | 0   | 4   | 0   | 0   | 0   | 1   |
| E18 | 3  | 2  | 2  | 0  | 4  | 1  | 1  | 0  | 0  | 0   | 0   | 0   | 1   | 0   | 1   | 0   | 0   | 0   | 4   |
| E19 | 1  | 0  | 0  | 0  | 0  | 4  | 0  | 0  | 0  | 0   | 0   | 0   | 0   | 0   | 0   | 1   | 0   | 0   | 0   |

Table S3. Case 2. Weighted Supermatrix and Priorities, according to procedure 1.

|     | E1    | E2    | E3    | E4    | E5    | E6    | E7    | E8    | E9    | E10   | E11   | E12   | E13   | E14   | E15   | E16   | E17   | E18   | E19   | Priorities |
|-----|-------|-------|-------|-------|-------|-------|-------|-------|-------|-------|-------|-------|-------|-------|-------|-------|-------|-------|-------|------------|
| E1  | 0.000 | 0.000 | 0.000 | 0.000 | 0.000 | 0.000 | 0.000 | 0.000 | 0.000 | 0.000 | 0.215 | 0.071 | 0.095 | 0.000 | 0.000 | 0.076 | 0.000 | 0.046 | 0.077 | 0.036      |
| E2  | 0.000 | 0.000 | 0.657 | 1.000 | 0.028 | 0.000 | 0.000 | 0.000 | 0.000 | 0.000 | 0.000 | 0.000 | 0.000 | 0.000 | 0.000 | 0.000 | 0.000 | 0.158 | 0.000 | 0.015      |
| E3  | 0.000 | 0.529 | 0.000 | 0.000 | 0.235 | 0.000 | 0.000 | 0.000 | 0.000 | 0.000 | 0.000 | 0.000 | 0.000 | 0.000 | 0.000 | 0.000 | 0.000 | 0.020 | 0.000 | 0.009      |
| E4  | 0.000 | 0.057 | 0.076 | 0.000 | 0.235 | 0.000 | 0.000 | 0.000 | 0.000 | 0.000 | 0.000 | 0.000 | 0.000 | 0.000 | 0.000 | 0.000 | 0.000 | 0.000 | 0.000 | 0.002      |
| E5  | 0.000 | 0.057 | 0.076 | 0.000 | 0.000 | 0.000 | 0.000 | 0.000 | 0.000 | 0.000 | 0.000 | 0.000 | 0.000 | 0.000 | 0.000 | 0.000 | 0.000 | 0.020 | 0.000 | 0.002      |
| E6  | 0.000 | 0.000 | 0.000 | 0.000 | 0.028 | 0.000 | 0.084 | 0.370 | 0.528 | 0.238 | 0.083 | 0.000 | 0.037 | 0.083 | 0.000 | 0.000 | 0.000 | 0.020 | 0.000 | 0.086      |
| E7  | 0.000 | 0.000 | 0.000 | 0.000 | 0.000 | 0.141 | 0.000 | 0.170 | 0.210 | 0.238 | 0.083 | 0.071 | 0.037 | 0.083 | 0.000 | 0.000 | 0.000 | 0.020 | 0.000 | 0.076      |
| E8  | 0.000 | 0.000 | 0.000 | 0.000 | 0.028 | 0.141 | 0.306 | 0.000 | 0.210 | 0.238 | 0.083 | 0.071 | 0.037 | 0.083 | 0.000 | 0.000 | 0.000 | 0.020 | 0.000 | 0.085      |
| E9  | 0.000 | 0.000 | 0.000 | 0.000 | 0.000 | 0.141 | 0.035 | 0.045 | 0.000 | 0.000 | 0.000 | 0.000 | 0.000 | 0.000 | 0.000 | 0.000 | 0.000 | 0.020 | 0.000 | 0.019      |
| E10 | 0.000 | 0.000 | 0.000 | 0.000 | 0.000 | 0.141 | 0.306 | 0.370 | 0.000 | 0.000 | 0.083 | 0.000 | 0.037 | 0.000 | 0.000 | 0.000 | 0.000 | 0.000 | 0.000 | 0.075      |
| E11 | 0.106 | 0.057 | 0.000 | 0.000 | 0.063 | 0.031 | 0.035 | 0.045 | 0.052 | 0.048 | 0.000 | 0.071 | 0.095 | 0.083 | 0.100 | 0.191 | 0.100 | 0.046 | 0.077 | 0.065      |
| E12 | 0.043 | 0.000 | 0.000 | 0.000 | 0.000 | 0.031 | 0.035 | 0.000 | 0.000 | 0.000 | 0.000 | 0.000 | 0.313 | 0.583 | 0.000 | 0.000 | 0.100 | 0.158 | 0.077 | 0.117      |
| E13 | 0.000 | 0.000 | 0.000 | 0.000 | 0.028 | 0.000 | 0.000 | 0.000 | 0.000 | 0.238 | 0.000 | 0.071 | 0.000 | 0.083 | 0.100 | 0.657 | 0.000 | 0.158 | 0.077 | 0.073      |
| E14 | 0.430 | 0.150 | 0.000 | 0.000 | 0.120 | 0.031 | 0.162 | 0.000 | 0.000 | 0.000 | 0.035 | 0.500 | 0.313 | 0.000 | 0.000 | 0.000 | 0.000 | 0.158 | 0.077 | 0.126      |
| E15 | 0.043 | 0.000 | 0.000 | 0.000 | 0.000 | 0.000 | 0.000 | 0.000 | 0.000 | 0.000 | 0.000 | 0.071 | 0.000 | 0.000 | 0.000 | 0.000 | 0.700 | 0.158 | 0.000 | 0.053      |
| E16 | 0.000 | 0.000 | 0.000 | 0.000 | 0.000 | 0.000 | 0.000 | 0.000 | 0.000 | 0.000 | 0.417 | 0.000 | 0.000 | 0.000 | 0.000 | 0.000 | 0.100 | 0.000 | 0.000 | 0.032      |
| E17 | 0.106 | 0.000 | 0.000 | 0.000 | 0.000 | 0.000 | 0.000 | 0.000 | 0.000 | 0.000 | 0.000 | 0.071 | 0.000 | 0.000 | 0.700 | 0.000 | 0.000 | 0.000 | 0.077 | 0.052      |
| E18 | 0.230 | 0.150 | 0.191 | 0.000 | 0.235 | 0.031 | 0.035 | 0.000 | 0.000 | 0.000 | 0.000 | 0.000 | 0.037 | 0.000 | 0.100 | 0.000 | 0.000 | 0.000 | 0.538 | 0.043      |
| E19 | 0.043 | 0.000 | 0.000 | 0.000 | 0.000 | 0.314 | 0.000 | 0.000 | 0.000 | 0.000 | 0.000 | 0.000 | 0.000 | 0.000 | 0.000 | 0.076 | 0.000 | 0.000 | 0.000 | 0.031      |

Table S4. Case 2. Weighted Supermatrix and Priorities, according to procedure 2.

|     | E1    | E2    | E3    | E4    | E5    | E6    | E7    | E8    | E9    | E10   | E11   | E12   | E13   | E14   | E15   | E16   | E17   | E18   | E19   | Priorities |
|-----|-------|-------|-------|-------|-------|-------|-------|-------|-------|-------|-------|-------|-------|-------|-------|-------|-------|-------|-------|------------|
| E1  | 0.019 | 0.023 | 0.027 | 0.037 | 0.014 | 0.015 | 0.017 | 0.021 | 0.023 | 0.018 | 0.155 | 0.065 | 0.089 | 0.025 | 0.029 | 0.076 | 0.029 | 0.050 | 0.069 | 0.043      |
| E2  | 0.019 | 0.023 | 0.300 | 0.333 | 0.035 | 0.015 | 0.017 | 0.021 | 0.023 | 0.018 | 0.018 | 0.023 | 0.016 | 0.025 | 0.029 | 0.027 | 0.029 | 0.139 | 0.024 | 0.048      |
| E3  | 0.019 | 0.281 | 0.027 | 0.037 | 0.178 | 0.015 | 0.017 | 0.021 | 0.023 | 0.018 | 0.018 | 0.023 | 0.016 | 0.025 | 0.029 | 0.027 | 0.029 | 0.023 | 0.024 | 0.039      |
| E4  | 0.019 | 0.062 | 0.076 | 0.037 | 0.178 | 0.015 | 0.017 | 0.021 | 0.023 | 0.018 | 0.018 | 0.023 | 0.016 | 0.025 | 0.029 | 0.027 | 0.029 | 0.011 | 0.024 | 0.029      |
| E5  | 0.019 | 0.062 | 0.076 | 0.037 | 0.014 | 0.015 | 0.017 | 0.021 | 0.023 | 0.018 | 0.018 | 0.023 | 0.016 | 0.025 | 0.029 | 0.027 | 0.029 | 0.023 | 0.024 | 0.026      |
| E6  | 0.019 | 0.023 | 0.027 | 0.037 | 0.035 | 0.015 | 0.085 | 0.223 | 0.253 | 0.170 | 0.086 | 0.023 | 0.043 | 0.073 | 0.029 | 0.027 | 0.029 | 0.023 | 0.024 | 0.069      |
| E7  | 0.019 | 0.023 | 0.027 | 0.037 | 0.014 | 0.122 | 0.017 | 0.150 | 0.166 | 0.170 | 0.086 | 0.065 | 0.043 | 0.073 | 0.029 | 0.027 | 0.029 | 0.023 | 0.024 | 0.066      |
| E8  | 0.019 | 0.023 | 0.027 | 0.037 | 0.035 | 0.122 | 0.211 | 0.021 | 0.166 | 0.170 | 0.086 | 0.065 | 0.043 | 0.073 | 0.029 | 0.027 | 0.029 | 0.023 | 0.024 | 0.070      |
| E9  | 0.019 | 0.023 | 0.027 | 0.037 | 0.014 | 0.122 | 0.043 | 0.056 | 0.023 | 0.018 | 0.018 | 0.023 | 0.016 | 0.025 | 0.029 | 0.027 | 0.029 | 0.023 | 0.024 | 0.033      |
| E10 | 0.019 | 0.023 | 0.027 | 0.037 | 0.014 | 0.122 | 0.211 | 0.223 | 0.023 | 0.018 | 0.086 | 0.023 | 0.043 | 0.025 | 0.029 | 0.027 | 0.029 | 0.011 | 0.024 | 0.062      |
| E11 | 0.099 | 0.062 | 0.027 | 0.037 | 0.069 | 0.038 | 0.043 | 0.056 | 0.064 | 0.075 | 0.018 | 0.065 | 0.089 | 0.073 | 0.084 | 0.141 | 0.084 | 0.050 | 0.069 | 0.064      |
| E12 | 0.051 | 0.023 | 0.027 | 0.037 | 0.014 | 0.038 | 0.043 | 0.021 | 0.023 | 0.018 | 0.018 | 0.023 | 0.222 | 0.305 | 0.029 | 0.027 | 0.084 | 0.139 | 0.069 | 0.076      |
| E13 | 0.019 | 0.023 | 0.027 | 0.037 | 0.035 | 0.015 | 0.017 | 0.021 | 0.023 | 0.170 | 0.018 | 0.065 | 0.016 | 0.073 | 0.084 | 0.300 | 0.029 | 0.139 | 0.069 | 0.061      |
| E14 | 0.252 | 0.120 | 0.027 | 0.037 | 0.113 | 0.038 | 0.137 | 0.021 | 0.023 | 0.018 | 0.045 | 0.298 | 0.222 | 0.025 | 0.029 | 0.027 | 0.029 | 0.139 | 0.069 | 0.092      |
| E15 | 0.051 | 0.023 | 0.027 | 0.037 | 0.014 | 0.015 | 0.017 | 0.021 | 0.023 | 0.018 | 0.018 | 0.065 | 0.016 | 0.025 | 0.029 | 0.027 | 0.314 | 0.139 | 0.024 | 0.045      |
| E16 | 0.019 | 0.023 | 0.027 | 0.037 | 0.014 | 0.015 | 0.017 | 0.021 | 0.023 | 0.018 | 0.242 | 0.023 | 0.016 | 0.025 | 0.029 | 0.027 | 0.084 | 0.011 | 0.024 | 0.038      |
| E17 | 0.099 | 0.023 | 0.027 | 0.037 | 0.014 | 0.015 | 0.017 | 0.021 | 0.023 | 0.018 | 0.018 | 0.065 | 0.016 | 0.025 | 0.314 | 0.027 | 0.029 | 0.011 | 0.069 | 0.042      |
| E18 | 0.166 | 0.120 | 0.141 | 0.037 | 0.178 | 0.038 | 0.043 | 0.021 | 0.023 | 0.018 | 0.018 | 0.023 | 0.043 | 0.025 | 0.084 | 0.027 | 0.029 | 0.011 | 0.301 | 0.059      |
| E19 | 0.051 | 0.023 | 0.027 | 0.037 | 0.014 | 0.210 | 0.017 | 0.021 | 0.023 | 0.018 | 0.018 | 0.023 | 0.016 | 0.025 | 0.029 | 0.076 | 0.029 | 0.011 | 0.024 | 0.038      |

Table S5. Case 3. Original Weighted Supermatrix and Priorities.

|     | E1    | E2    | E3    | E4    | E5    | E6    | E7    | E8    | E9    | E10   | E11   | E12   | E13   | E14   | E15   | E16   | E17   | E18   | Priorities |
|-----|-------|-------|-------|-------|-------|-------|-------|-------|-------|-------|-------|-------|-------|-------|-------|-------|-------|-------|------------|
| E1  | 0.000 | 0.000 | 0.000 | 0.000 | 0.131 | 0.125 | 0.097 | 0.048 | 0.083 | 0.011 | 0.066 | 0.121 | 0.125 | 0.025 | 0.054 | 0.125 | 0.125 | 0.083 | 0.094      |
| E2  | 0.000 | 0.000 | 0.000 | 0.000 | 0.297 | 0.125 | 0.057 | 0.096 | 0.083 | 0.024 | 0.029 | 0.043 | 0.125 | 0.079 | 0.156 | 0.125 | 0.125 | 0.083 | 0.134      |
| E3  | 0.000 | 0.000 | 0.000 | 0.000 | 0.053 | 0.125 | 0.037 | 0.168 | 0.083 | 0.113 | 0.014 | 0.118 | 0.125 | 0.139 | 0.024 | 0.125 | 0.125 | 0.083 | 0.118      |
| E4  | 0.000 | 0.000 | 0.000 | 0.000 | 0.020 | 0.125 | 0.142 | 0.021 | 0.083 | 0.052 | 0.141 | 0.052 | 0.125 | 0.257 | 0.016 | 0.125 | 0.125 | 0.083 | 0.154      |
| E5  | 0.218 | 0.218 | 0.229 | 0.229 | 0.000 | 0.000 | 0.000 | 0.000 | 0.000 | 0.000 | 0.250 | 0.333 | 0.000 | 0.000 | 0.000 | 0.000 | 0.000 | 0.000 | 0.068      |
| E6  | 0.044 | 0.044 | 0.033 | 0.033 | 0.000 | 0.000 | 0.333 | 0.333 | 0.333 | 0.200 | 0.000 | 0.000 | 0.000 | 0.000 | 0.250 | 0.000 | 0.000 | 0.000 | 0.031      |
| E7  | 0.069 | 0.031 | 0.022 | 0.079 | 0.000 | 0.000 | 0.000 | 0.042 | 0.250 | 0.059 | 0.000 | 0.000 | 0.000 | 0.000 | 0.000 | 0.000 | 0.000 | 0.000 | 0.016      |
| E8  | 0.015 | 0.012 | 0.013 | 0.015 | 0.000 | 0.000 | 0.232 | 0.000 | 0.057 | 0.128 | 0.000 | 0.000 | 0.000 | 0.000 | 0.000 | 0.000 | 0.000 | 0.000 | 0.011      |
| E9  | 0.006 | 0.005 | 0.005 | 0.005 | 0.000 | 0.438 | 0.076 | 0.000 | 0.000 | 0.013 | 0.000 | 0.000 | 0.000 | 0.000 | 0.000 | 0.000 | 0.000 | 0.000 | 0.016      |
| E10 | 0.035 | 0.078 | 0.086 | 0.026 | 0.000 | 0.063 | 0.025 | 0.292 | 0.026 | 0.000 | 0.000 | 0.000 | 0.500 | 0.000 | 0.000 | 0.000 | 0.000 | 0.000 | 0.024      |
| E11 | 0.049 | 0.049 | 0.051 | 0.049 | 0.250 | 0.000 | 0.000 | 0.000 | 0.000 | 0.200 | 0.000 | 0.333 | 0.000 | 0.000 | 0.042 | 0.000 | 0.000 | 0.000 | 0.043      |
| E12 | 0.007 | 0.007 | 0.006 | 0.007 | 0.250 | 0.000 | 0.000 | 0.000 | 0.000 | 0.000 | 0.250 | 0.000 | 0.000 | 0.000 | 0.208 | 0.000 | 0.000 | 0.000 | 0.033      |
| E13 | 0.065 | 0.087 | 0.052 | 0.052 | 0.000 | 0.000 | 0.000 | 0.000 | 0.000 | 0.025 | 0.000 | 0.000 | 0.000 | 0.000 | 0.000 | 0.000 | 0.000 | 0.000 | 0.014      |
| E14 | 0.457 | 0.435 | 0.470 | 0.470 | 0.000 | 0.000 | 0.000 | 0.000 | 0.000 | 0.175 | 0.250 | 0.000 | 0.000 | 0.000 | 0.000 | 0.000 | 0.000 | 0.333 | 0.130      |
| E15 | 0.020 | 0.020 | 0.020 | 0.020 | 0.000 | 0.000 | 0.000 | 0.000 | 0.000 | 0.000 | 0.000 | 0.000 | 0.000 | 0.000 | 0.000 | 0.500 | 0.000 | 0.000 | 0.017      |
| E16 | 0.003 | 0.003 | 0.003 | 0.003 | 0.000 | 0.000 | 0.000 | 0.000 | 0.000 | 0.000 | 0.000 | 0.000 | 0.000 | 0.000 | 0.250 | 0.000 | 0.000 | 0.333 | 0.026      |
| E17 | 0.008 | 0.008 | 0.008 | 0.008 | 0.000 | 0.000 | 0.000 | 0.000 | 0.000 | 0.000 | 0.000 | 0.000 | 0.000 | 0.063 | 0.000 | 0.000 | 0.000 | 0.000 | 0.010      |
| E18 | 0.003 | 0.003 | 0.003 | 0.003 | 0.000 | 0.000 | 0.000 | 0.000 | 0.000 | 0.000 | 0.000 | 0.000 | 0.000 | 0.437 | 0.000 | 0.000 | 0.500 | 0.000 | 0.062      |

Table S6. Case 3's X Influence Matrix.

|     | E1 | E2 | E3 | E4 | E5 | E6 | E7 | E8 | E9 | E10 | E11 | E12 | E13 | E14 | E15 | E16 | E17 | E18 |
|-----|----|----|----|----|----|----|----|----|----|-----|-----|-----|-----|-----|-----|-----|-----|-----|
| E1  | 0  | 0  | 0  | 0  | 2  | 1  | 1  | 0  | 1  | 0   | 1   | 1   | 1   | 0   | 1   | 1   | 1   | 1   |
| E2  | 0  | 0  | 0  | 0  | 4  | 1  | 0  | 1  | 1  | 0   | 0   | 0   | 1   | 0   | 3   | 1   | 1   | 1   |
| E3  | 0  | 0  | 0  | 0  | 0  | 1  | 0  | 2  | 1  | 2   | 0   | 1   | 1   | 1   | 0   | 1   | 1   | 1   |
| E4  | 0  | 0  | 0  | 0  | 0  | 1  | 2  | 0  | 1  | 1   | 2   | 0   | 1   | 2   | 0   | 1   | 1   | 1   |
| E5  | 2  | 2  | 2  | 2  | 0  | 0  | 0  | 0  | 0  | 0   | 4   | 4   | 0   | 0   | 0   | 0   | 0   | 0   |
| E6  | 0  | 0  | 0  | 0  | 0  | 0  | 4  | 4  | 4  | 4   | 0   | 0   | 0   | 0   | 4   | 0   | 0   | 0   |
| E7  | 0  | 0  | 0  | 0  | 0  | 0  | 0  | 0  | 3  | 1   | 0   | 0   | 0   | 0   | 0   | 0   | 0   | 0   |
| E8  | 0  | 0  | 0  | 0  | 0  | 0  | 3  | 0  | 0  | 3   | 0   | 0   | 0   | 0   | 0   | 0   | 0   | 0   |
| E9  | 0  | 0  | 0  | 0  | 0  | 4  | 1  | 0  | 0  | 0   | 0   | 0   | 0   | 0   | 0   | 0   | 0   | 0   |
| E10 | 0  | 0  | 0  | 0  | 0  | 0  | 0  | 4  | 0  | 0   | 0   | 0   | 4   | 0   | 0   | 0   | 0   | 0   |
| E11 | 0  | 0  | 0  | 0  | 4  | 0  | 0  | 0  | 0  | 4   | 0   | 4   | 0   | 0   | 0   | 0   | 0   | 0   |
| E12 | 0  | 0  | 0  | 0  | 4  | 0  | 0  | 0  | 0  | 0   | 4   | 0   | 0   | 0   | 4   | 0   | 0   | 0   |
| E13 | 0  | 1  | 0  | 0  | 0  | 0  | 0  | 0  | 0  | 0   | 0   | 0   | 0   | 0   | 0   | 0   | 0   | 0   |
| E14 | 4  | 4  | 4  | 4  | 0  | 0  | 0  | 0  | 0  | 4   | 4   | 0   | 0   | 0   | 0   | 0   | 0   | 4   |
| E15 | 0  | 0  | 0  | 0  | 0  | 0  | 0  | 0  | 0  | 0   | 0   | 0   | 0   | 0   | 0   | 4   | 0   | 0   |
| E16 | 0  | 0  | 0  | 0  | 0  | 0  | 0  | 0  | 0  | 0   | 0   | 0   | 0   | 0   | 4   | 0   | 0   | 4   |
| E17 | 0  | 0  | 0  | 0  | 0  | 0  | 0  | 0  | 0  | 0   | 0   | 0   | 0   | 0   | 0   | 0   | 0   | 0   |
| E18 | 0  | 0  | 0  | 0  | 0  | 0  | 0  | 0  | 0  | 0   | 0   | 0   | 0   | 4   | 0   | 0   | 4   | 0   |

Table S7. Case 3. Weighted Supermatrix and Priorities, according to procedure 1.

|     | E1    | E2    | E3    | E4    | E5    | E6    | E7    | E8    | E9    | E10   | E11   | E12   | E13   | E14   | E15   | E16   | E17   | E18   | Priorities |
|-----|-------|-------|-------|-------|-------|-------|-------|-------|-------|-------|-------|-------|-------|-------|-------|-------|-------|-------|------------|
| E1  | 0.000 | 0.000 | 0.000 | 0.000 | 0.063 | 0.091 | 0.053 | 0.000 | 0.060 | 0.000 | 0.037 | 0.063 | 0.091 | 0.000 | 0.035 | 0.091 | 0.091 | 0.056 | 0.033      |
| E2  | 0.000 | 0.000 | 0.000 | 0.000 | 0.313 | 0.091 | 0.000 | 0.051 | 0.060 | 0.000 | 0.000 | 0.000 | 0.091 | 0.000 | 0.113 | 0.091 | 0.091 | 0.056 | 0.050      |
| E3  | 0.000 | 0.000 | 0.000 | 0.000 | 0.000 | 0.091 | 0.000 | 0.104 | 0.060 | 0.060 | 0.000 | 0.063 | 0.091 | 0.081 | 0.000 | 0.091 | 0.091 | 0.056 | 0.046      |
| E4  | 0.000 | 0.000 | 0.000 | 0.000 | 0.000 | 0.091 | 0.122 | 0.000 | 0.060 | 0.029 | 0.071 | 0.000 | 0.091 | 0.188 | 0.000 | 0.091 | 0.091 | 0.056 | 0.073      |
| E5  | 0.167 | 0.188 | 0.167 | 0.167 | 0.000 | 0.000 | 0.000 | 0.000 | 0.000 | 0.000 | 0.297 | 0.438 | 0.000 | 0.000 | 0.000 | 0.000 | 0.000 | 0.000 | 0.070      |
| E6  | 0.000 | 0.000 | 0.000 | 0.000 | 0.000 | 0.000 | 0.514 | 0.423 | 0.491 | 0.255 | 0.000 | 0.000 | 0.000 | 0.000 | 0.284 | 0.000 | 0.000 | 0.000 | 0.029      |
| E7  | 0.000 | 0.000 | 0.000 | 0.000 | 0.000 | 0.000 | 0.000 | 0.000 | 0.269 | 0.029 | 0.000 | 0.000 | 0.000 | 0.000 | 0.000 | 0.000 | 0.000 | 0.000 | 0.005      |
| E8  | 0.000 | 0.000 | 0.000 | 0.000 | 0.000 | 0.000 | 0.258 | 0.000 | 0.000 | 0.118 | 0.000 | 0.000 | 0.000 | 0.000 | 0.000 | 0.000 | 0.000 | 0.000 | 0.002      |
| E9  | 0.000 | 0.000 | 0.000 | 0.000 | 0.000 | 0.636 | 0.053 | 0.000 | 0.000 | 0.000 | 0.000 | 0.000 | 0.000 | 0.000 | 0.000 | 0.000 | 0.000 | 0.000 | 0.019      |
| E10 | 0.000 | 0.000 | 0.000 | 0.000 | 0.000 | 0.000 | 0.000 | 0.423 | 0.000 | 0.000 | 0.000 | 0.000 | 0.636 | 0.000 | 0.000 | 0.000 | 0.000 | 0.000 | 0.003      |
| E11 | 0.000 | 0.000 | 0.000 | 0.000 | 0.313 | 0.000 | 0.000 | 0.000 | 0.000 | 0.255 | 0.000 | 0.438 | 0.000 | 0.000 | 0.000 | 0.000 | 0.000 | 0.000 | 0.045      |
| E12 | 0.000 | 0.000 | 0.000 | 0.000 | 0.313 | 0.000 | 0.000 | 0.000 | 0.000 | 0.000 | 0.297 | 0.000 | 0.000 | 0.000 | 0.284 | 0.000 | 0.000 | 0.000 | 0.051      |
| E13 | 0.000 | 0.081 | 0.000 | 0.000 | 0.000 | 0.000 | 0.000 | 0.000 | 0.000 | 0.000 | 0.000 | 0.000 | 0.000 | 0.000 | 0.000 | 0.000 | 0.000 | 0.000 | 0.004      |
| E14 | 0.833 | 0.731 | 0.833 | 0.833 | 0.000 | 0.000 | 0.000 | 0.000 | 0.000 | 0.255 | 0.297 | 0.000 | 0.000 | 0.000 | 0.000 | 0.000 | 0.000 | 0.389 | 0.248      |
| E15 | 0.000 | 0.000 | 0.000 | 0.000 | 0.000 | 0.000 | 0.000 | 0.000 | 0.000 | 0.000 | 0.000 | 0.000 | 0.000 | 0.000 | 0.000 | 0.636 | 0.000 | 0.000 | 0.055      |
| E16 | 0.000 | 0.000 | 0.000 | 0.000 | 0.000 | 0.000 | 0.000 | 0.000 | 0.000 | 0.000 | 0.000 | 0.000 | 0.000 | 0.000 | 0.284 | 0.000 | 0.000 | 0.389 | 0.086      |
| E17 | 0.000 | 0.000 | 0.000 | 0.000 | 0.000 | 0.000 | 0.000 | 0.000 | 0.000 | 0.000 | 0.000 | 0.000 | 0.000 | 0.000 | 0.000 | 0.000 | 0.000 | 0.000 | 0.000      |
| E18 | 0.000 | 0.000 | 0.000 | 0.000 | 0.000 | 0.000 | 0.000 | 0.000 | 0.000 | 0.000 | 0.000 | 0.000 | 0.000 | 0.731 | 0.000 | 0.000 | 0.636 | 0.000 | 0.181      |

Table S8. Case 3. Weighted Supermatrix and Priorities, according to procedure 2.

|     | E1    | E2    | E3    | E4    | E5    | E6    | E7    | E8    | E9    | E10   | E11   | E12   | E13   | E14   | E15   | E16   | E17   | E18   | Priorities |
|-----|-------|-------|-------|-------|-------|-------|-------|-------|-------|-------|-------|-------|-------|-------|-------|-------|-------|-------|------------|
| E1  | 0.033 | 0.030 | 0.033 | 0.033 | 0.093 | 0.080 | 0.063 | 0.024 | 0.063 | 0.016 | 0.051 | 0.070 | 0.080 | 0.030 | 0.049 | 0.080 | 0.080 | 0.060 | 0.052      |
| E2  | 0.033 | 0.030 | 0.033 | 0.033 | 0.205 | 0.080 | 0.023 | 0.064 | 0.063 | 0.016 | 0.019 | 0.025 | 0.080 | 0.030 | 0.126 | 0.080 | 0.080 | 0.060 | 0.060      |
| E3  | 0.033 | 0.030 | 0.033 | 0.033 | 0.021 | 0.080 | 0.023 | 0.113 | 0.063 | 0.073 | 0.019 | 0.070 | 0.080 | 0.085 | 0.019 | 0.080 | 0.080 | 0.060 | 0.055      |
| E4  | 0.033 | 0.030 | 0.033 | 0.033 | 0.021 | 0.080 | 0.116 | 0.024 | 0.063 | 0.040 | 0.089 | 0.025 | 0.080 | 0.150 | 0.019 | 0.080 | 0.080 | 0.060 | 0.063      |
| E5  | 0.157 | 0.150 | 0.157 | 0.157 | 0.021 | 0.028 | 0.023 | 0.024 | 0.023 | 0.016 | 0.202 | 0.256 | 0.028 | 0.030 | 0.019 | 0.028 | 0.028 | 0.022 | 0.079      |
| E6  | 0.033 | 0.030 | 0.033 | 0.033 | 0.021 | 0.028 | 0.274 | 0.246 | 0.280 | 0.185 | 0.019 | 0.025 | 0.028 | 0.030 | 0.193 | 0.028 | 0.028 | 0.022 | 0.069      |
| E7  | 0.033 | 0.030 | 0.033 | 0.033 | 0.021 | 0.028 | 0.023 | 0.024 | 0.191 | 0.040 | 0.019 | 0.025 | 0.028 | 0.030 | 0.019 | 0.028 | 0.028 | 0.022 | 0.035      |
| E8  | 0.033 | 0.030 | 0.033 | 0.033 | 0.021 | 0.028 | 0.184 | 0.024 | 0.023 | 0.117 | 0.019 | 0.025 | 0.028 | 0.030 | 0.019 | 0.028 | 0.028 | 0.022 | 0.036      |
| E9  | 0.033 | 0.030 | 0.033 | 0.033 | 0.021 | 0.320 | 0.063 | 0.024 | 0.023 | 0.016 | 0.019 | 0.025 | 0.028 | 0.030 | 0.019 | 0.028 | 0.028 | 0.022 | 0.048      |
| E10 | 0.033 | 0.030 | 0.033 | 0.033 | 0.021 | 0.028 | 0.023 | 0.246 | 0.023 | 0.016 | 0.019 | 0.025 | 0.320 | 0.030 | 0.019 | 0.028 | 0.028 | 0.022 | 0.043      |
| E11 | 0.033 | 0.030 | 0.033 | 0.033 | 0.205 | 0.028 | 0.023 | 0.024 | 0.023 | 0.185 | 0.019 | 0.256 | 0.028 | 0.030 | 0.019 | 0.028 | 0.028 | 0.022 | 0.061      |
| E12 | 0.033 | 0.030 | 0.033 | 0.033 | 0.205 | 0.028 | 0.023 | 0.024 | 0.023 | 0.016 | 0.202 | 0.025 | 0.028 | 0.030 | 0.193 | 0.028 | 0.028 | 0.022 | 0.059      |
| E13 | 0.033 | 0.085 | 0.033 | 0.033 | 0.021 | 0.028 | 0.023 | 0.024 | 0.023 | 0.016 | 0.019 | 0.025 | 0.028 | 0.030 | 0.019 | 0.028 | 0.028 | 0.022 | 0.029      |
| E14 | 0.321 | 0.315 | 0.321 | 0.321 | 0.021 | 0.028 | 0.023 | 0.024 | 0.023 | 0.185 | 0.202 | 0.025 | 0.028 | 0.030 | 0.019 | 0.028 | 0.028 | 0.249 | 0.126      |
| E15 | 0.033 | 0.030 | 0.033 | 0.033 | 0.021 | 0.028 | 0.023 | 0.024 | 0.023 | 0.016 | 0.019 | 0.025 | 0.028 | 0.030 | 0.019 | 0.320 | 0.028 | 0.022 | 0.040      |
| E16 | 0.033 | 0.030 | 0.033 | 0.033 | 0.021 | 0.028 | 0.023 | 0.024 | 0.023 | 0.016 | 0.019 | 0.025 | 0.028 | 0.030 | 0.193 | 0.028 | 0.028 | 0.249 | 0.049      |
| E17 | 0.033 | 0.030 | 0.033 | 0.033 | 0.021 | 0.028 | 0.023 | 0.024 | 0.023 | 0.016 | 0.019 | 0.025 | 0.028 | 0.030 | 0.019 | 0.028 | 0.028 | 0.022 | 0.026      |
| E18 | 0.033 | 0.030 | 0.033 | 0.033 | 0.021 | 0.028 | 0.023 | 0.024 | 0.023 | 0.016 | 0.019 | 0.025 | 0.028 | 0.315 | 0.019 | 0.028 | 0.320 | 0.022 | 0.070      |

Table S9. Case 4. Original Weighted Supermatrix and Priorities.

|     | E1    | E2    | E3    | E4    | E5    | E6    | E7    | E8    | E9    | E10   | E11   | E12   | E13   | E14   | E15   | E16   | E17   | E18   | E19   | E20   |
|-----|-------|-------|-------|-------|-------|-------|-------|-------|-------|-------|-------|-------|-------|-------|-------|-------|-------|-------|-------|-------|
| E1  | 0.069 | 0.000 | 0.003 | 0.000 | 0.003 | 0.059 | 0.035 | 0.004 | 0.006 | 0.004 | 0.006 | 0.000 | 0.022 | 0.025 | 0.000 | 0.000 | 0.000 | 0.000 | 0.000 | 0.000 |
| E2  | 0.000 | 0.046 | 0.012 | 0.032 | 0.017 | 0.000 | 0.000 | 0.031 | 0.029 | 0.031 | 0.029 | 0.000 | 0.003 | 0.000 | 0.000 | 0.000 | 0.000 | 0.000 | 0.000 | 0.035 |
| E3  | 0.007 | 0.000 | 0.046 | 0.005 | 0.053 | 0.000 | 0.000 | 0.000 | 0.000 | 0.000 | 0.000 | 0.000 | 0.000 | 0.000 | 0.000 | 0.000 | 0.000 | 0.000 | 0.000 | 0.000 |
| E4  | 0.000 | 0.046 | 0.011 | 0.028 | 0.012 | 0.000 | 0.000 | 0.000 | 0.000 | 0.000 | 0.000 | 0.000 | 0.000 | 0.000 | 0.000 | 0.000 | 0.000 | 0.000 | 0.000 | 0.000 |
| E5  | 0.006 | 0.015 | 0.043 | 0.042 | 0.039 | 0.000 | 0.000 | 0.000 | 0.000 | 0.000 | 0.000 | 0.000 | 0.000 | 0.000 | 0.000 | 0.000 | 0.000 | 0.000 | 0.000 | 0.000 |
| E6  | 0.032 | 0.000 | 0.009 | 0.000 | 0.000 | 0.059 | 0.000 | 0.000 | 0.000 | 0.000 | 0.000 | 0.000 | 0.000 | 0.000 | 0.000 | 0.000 | 0.000 | 0.000 | 0.000 | 0.000 |
| E7  | 0.149 | 0.000 | 0.000 | 0.000 | 0.000 | 0.116 | 0.063 | 0.010 | 0.003 | 0.002 | 0.004 | 0.000 | 0.063 | 0.057 | 0.010 | 0.000 | 0.000 | 0.000 | 0.000 | 0.000 |
| E8  | 0.000 | 0.067 | 0.000 | 0.000 | 0.000 | 0.039 | 0.021 | 0.073 | 0.000 | 0.000 | 0.000 | 0.000 | 0.013 | 0.019 | 0.072 | 0.014 | 0.000 | 0.000 | 0.000 | 0.000 |
| E9  | 0.000 | 0.016 | 0.000 | 0.047 | 0.000 | 0.000 | 0.000 | 0.000 | 0.047 | 0.022 | 0.021 | 0.000 | 0.000 | 0.000 | 0.000 | 0.000 | 0.000 | 0.000 | 0.000 | 0.000 |
| E10 | 0.000 | 0.043 | 0.000 | 0.047 | 0.000 | 0.000 | 0.000 | 0.000 | 0.020 | 0.047 | 0.006 | 0.000 | 0.000 | 0.000 | 0.000 | 0.096 | 0.000 | 0.000 | 0.106 | 0.106 |
| E11 | 0.000 | 0.014 | 0.000 | 0.047 | 0.000 | 0.000 | 0.000 | 0.000 | 0.013 | 0.013 | 0.052 | 0.000 | 0.000 | 0.000 | 0.000 | 0.000 | 0.000 | 0.000 | 0.000 | 0.000 |
| E12 | 0.000 | 0.000 | 0.000 | 0.000 | 0.000 | 0.000 | 0.000 | 0.000 | 0.000 | 0.000 | 0.000 | 0.182 | 0.000 | 0.000 | 0.000 | 0.000 | 0.000 | 0.000 | 0.000 | 0.000 |
| E13 | 0.045 | 0.000 | 0.000 | 0.000 | 0.000 | 0.052 | 0.053 | 0.008 | 0.000 | 0.000 | 0.000 | 0.000 | 0.107 | 0.062 | 0.027 | 0.000 | 0.000 | 0.000 | 0.000 | 0.000 |
| E14 | 0.045 | 0.000 | 0.000 | 0.000 | 0.000 | 0.052 | 0.066 | 0.051 | 0.000 | 0.000 | 0.000 | 0.000 | 0.061 | 0.100 | 0.000 | 0.000 | 0.000 | 0.000 | 0.000 | 0.038 |
| E15 | 0.009 | 0.000 | 0.000 | 0.000 | 0.000 | 0.000 | 0.016 | 0.065 | 0.000 | 0.000 | 0.000 | 0.000 | 0.019 | 0.011 | 0.192 | 0.000 | 0.000 | 0.000 | 0.000 | 0.000 |
| E16 | 0.000 | 0.000 | 0.000 | 0.000 | 0.000 | 0.000 | 0.000 | 0.000 | 0.124 | 0.118 | 0.124 | 0.000 | 0.000 | 0.000 | 0.000 | 0.296 | 0.000 | 0.000 | 0.000 | 0.000 |
| E17 | 0.000 | 0.000 | 0.000 | 0.000 | 0.000 | 0.000 | 0.000 | 0.000 | 0.000 | 0.000 | 0.000 | 0.000 | 0.009 | 0.020 | 0.000 | 0.000 | 0.291 | 0.089 | 0.045 | 0.010 |
| E18 | 0.000 | 0.000 | 0.000 | 0.000 | 0.000 | 0.000 | 0.006 | 0.018 | 0.018 | 0.024 | 0.018 | 0.000 | 0.010 | 0.011 | 0.000 | 0.000 | 0.042 | 0.268 | 0.053 | 0.029 |
| E19 | 0.000 | 0.000 | 0.000 | 0.000 | 0.000 | 0.000 | 0.000 | 0.000 | 0.000 | 0.000 | 0.000 | 0.000 | 0.000 | 0.000 | 0.000 | 0.000 | 0.000 | 0.000 | 0.188 | 0.109 |
| E20 | 0.000 | 0.000 | 0.000 | 0.000 | 0.000 | 0.000 | 0.000 | 0.000 | 0.000 | 0.000 | 0.000 | 0.000 | 0.000 | 0.000 | 0.000 | 0.000 | 0.000 | 0.000 | 0.000 | 0.099 |
| E21 | 0.000 | 0.000 | 0.000 | 0.000 | 0.000 | 0.000 | 0.025 | 0.017 | 0.022 | 0.022 | 0.022 | 0.000 | 0.000 | 0.000 | 0.000 | 0.000 | 0.000 | 0.000 | 0.000 | 0.000 |
| E22 | 0.000 | 0.000 | 0.000 | 0.000 | 0.000 | 0.000 | 0.051 | 0.045 | 0.022 | 0.022 | 0.022 | 0.000 | 0.115 | 0.000 | 0.000 | 0.000 | 0.000 | 0.000 | 0.000 | 0.000 |
| E23 | 0.000 | 0.000 | 0.000 | 0.000 | 0.000 | 0.000 | 0.036 | 0.043 | 0.022 | 0.022 | 0.022 | 0.000 | 0.000 | 0.000 | 0.000 | 0.000 | 0.000 | 0.000 | 0.000 | 0.000 |
| E24 | 0.000 | 0.000 | 0.000 | 0.000 | 0.000 | 0.000 | 0.013 | 0.038 | 0.022 | 0.022 | 0.022 | 0.000 | 0.000 | 0.000 | 0.000 | 0.000 | 0.000 | 0.000 | 0.000 | 0.000 |
| E25 | 0.040 | 0.000 | 0.000 | 0.000 | 0.000 | 0.000 | 0.108 | 0.121 | 0.000 | 0.000 | 0.000 | 0.000 | 0.136 | 0.283 | 0.253 | 0.000 | 0.000 | 0.000 | 0.000 | 0.000 |
| E26 | 0.000 | 0.000 | 0.000 | 0.000 | 0.000 | 0.000 | 0.051 | 0.020 | 0.000 | 0.000 | 0.000 | 0.000 | 0.032 | 0.000 | 0.051 | 0.000 | 0.000 | 0.000 | 0.000 | 0.000 |
| E27 | 0.000 | 0.000 | 0.000 | 0.000 | 0.000 | 0.000 | 0.000 | 0.000 | 0.196 | 0.196 | 0.196 | 0.000 | 0.000 | 0.000 | 0.000 | 0.000 | 0.000 | 0.000 | 0.000 | 0.000 |
| E28 | 0.000 | 0.000 | 0.111 | 0.115 | 0.139 | 0.000 | 0.000 | 0.000 | 0.032 | 0.005 | 0.000 | 0.000 | 0.000 | 0.000 | 0.000 | 0.000 | 0.000 | 0.000 | 0.000 | 0.000 |
| E29 | 0.000 | 0.064 | 0.037 | 0.038 | 0.028 | 0.000 | 0.039 | 0.039 | 0.014 | 0.029 | 0.036 | 0.000 | 0.014 | 0.014 | 0.000 | 0.000 | 0.035 | 0.000 | 0.020 | 0.020 |
| E30 | 0.000 | 0.064 | 0.037 | 0.038 | 0.028 | 0.000 | 0.039 | 0.039 | 0.012 | 0.031 | 0.036 | 0.000 | 0.014 | 0.014 | 0.000 | 0.000 | 0.035 | 0.000 | 0.020 | 0.020 |
| E31 | 0.000 | 0.064 | 0.037 | 0.000 | 0.028 | 0.000 | 0.000 | 0.000 | 0.021 | 0.013 | 0.007 | 0.000 | 0.014 | 0.014 | 0.000 | 0.062 | 0.000 | 0.000 | 0.020 | 0.020 |
| E32 | 0.377 | 0.048 | 0.037 | 0.025 | 0.028 | 0.315 | 0.235 | 0.243 | 0.015 | 0.014 | 0.015 | 0.451 | 0.228 | 0.230 | 0.258 | 0.040 | 0.050 | 0.109 | 0.184 | 0.148 |
| E33 | 0.033 | 0.020 | 0.035 | 0.050 | 0.032 | 0.109 | 0.057 | 0.023 | 0.234 | 0.117 | 0.061 | 0.082 | 0.060 | 0.054 | 0.020 | 0.369 | 0.049 | 0.111 | 0.191 | 0.134 |
| E34 | 0.032 | 0.233 | 0.239 | 0.254 | 0.199 | 0.064 | 0.034 | 0.052 | 0.089 | 0.167 | 0.159 | 0.134 | 0.035 | 0.017 | 0.074 | 0.059 | 0.048 | 0.029 | 0.075 | 0.163 |
| E35 | 0.056 | 0.024 | 0.032 | 0.043 | 0.052 | 0.022 | 0.012 | 0.020 | 0.028 | 0.057 | 0.105 | 0.114 | 0.021 | 0.036 | 0.021 | 0.030 | 0.403 | 0.362 | 0.036 | 0.052 |
| E36 | 0.099 | 0.237 | 0.309 | 0.190 | 0.342 | 0.113 | 0.040 | 0.040 | 0.011 | 0.022 | 0.036 | 0.037 | 0.023 | 0.031 | 0.022 | 0.033 | 0.047 | 0.032 | 0.027 | 0.016 |

Table S9. Case 4. Original Weighted Supermatrix and Priorities (continued)

|     | E21   | E22   | E23   | E24   | E25   | E26   | E27   | E28   | E29   | E30   | E31   | E32   | E33   | E34   | E35   | E36   | Priorities |
|-----|-------|-------|-------|-------|-------|-------|-------|-------|-------|-------|-------|-------|-------|-------|-------|-------|------------|
| E1  | 0.000 | 0.000 | 0.000 | 0.000 | 0.023 | 0.000 | 0.000 | 0.000 | 0.000 | 0.000 | 0.000 | 0.060 | 0.005 | 0.004 | 0.029 | 0.003 | 0.014      |
| E2  | 0.000 | 0.000 | 0.000 | 0.000 | 0.000 | 0.000 | 0.000 | 0.213 | 0.322 | 0.322 | 0.334 | 0.013 | 0.031 | 0.023 | 0.034 | 0.015 | 0.026      |
| E3  | 0.000 | 0.000 | 0.000 | 0.000 | 0.000 | 0.000 | 0.000 | 0.035 | 0.000 | 0.000 | 0.000 | 0.006 | 0.012 | 0.003 | 0.014 | 0.032 | 0.004      |
| E4  | 0.000 | 0.000 | 0.000 | 0.000 | 0.000 | 0.000 | 0.000 | 0.000 | 0.000 | 0.000 | 0.000 | 0.007 | 0.011 | 0.017 | 0.007 | 0.011 | 0.004      |
| E5  | 0.000 | 0.000 | 0.000 | 0.000 | 0.000 | 0.000 | 0.000 | 0.086 | 0.000 | 0.000 | 0.000 | 0.007 | 0.031 | 0.043 | 0.008 | 0.029 | 0.007      |
| E6  | 0.000 | 0.000 | 0.000 | 0.000 | 0.000 | 0.000 | 0.000 | 0.000 | 0.000 | 0.000 | 0.000 | 0.008 | 0.012 | 0.012 | 0.009 | 0.012 | 0.003      |
| E7  | 0.019 | 0.007 | 0.020 | 0.007 | 0.005 | 0.006 | 0.000 | 0.010 | 0.004 | 0.005 | 0.000 | 0.319 | 0.030 | 0.028 | 0.073 | 0.215 | 0.054      |
| E8  | 0.011 | 0.027 | 0.011 | 0.022 | 0.032 | 0.031 | 0.000 | 0.000 | 0.001 | 0.001 | 0.000 | 0.102 | 0.019 | 0.030 | 0.073 | 0.105 | 0.032      |
| E9  | 0.002 | 0.001 | 0.002 | 0.004 | 0.000 | 0.000 | 0.005 | 0.013 | 0.008 | 0.010 | 0.021 | 0.032 | 0.253 | 0.179 | 0.073 | 0.052 | 0.033      |
| E10 | 0.002 | 0.001 | 0.002 | 0.003 | 0.000 | 0.000 | 0.005 | 0.032 | 0.032 | 0.033 | 0.021 | 0.034 | 0.173 | 0.212 | 0.073 | 0.056 | 0.038      |
| E11 | 0.002 | 0.001 | 0.002 | 0.002 | 0.000 | 0.000 | 0.027 | 0.007 | 0.014 | 0.010 | 0.021 | 0.032 | 0.099 | 0.114 | 0.073 | 0.052 | 0.022      |
| E12 | 0.000 | 0.000 | 0.000 | 0.000 | 0.000 | 0.000 | 0.000 | 0.000 | 0.000 | 0.000 | 0.000 | 0.065 | 0.010 | 0.021 | 0.219 | 0.105 | 0.021      |
| E13 | 0.125 | 0.196 | 0.219 | 0.259 | 0.041 | 0.037 | 0.000 | 0.000 | 0.000 | 0.000 | 0.000 | 0.114 | 0.027 | 0.029 | 0.015 | 0.015 | 0.047      |
| E14 | 0.111 | 0.062 | 0.018 | 0.000 | 0.032 | 0.000 | 0.000 | 0.256 | 0.185 | 0.062 | 0.214 | 0.045 | 0.010 | 0.024 | 0.078 | 0.042 | 0.036      |
| E15 | 0.016 | 0.019 | 0.041 | 0.037 | 0.202 | 0.259 | 0.000 | 0.000 | 0.000 | 0.000 | 0.000 | 0.023 | 0.013 | 0.024 | 0.018 | 0.014 | 0.040      |
| E16 | 0.000 | 0.000 | 0.000 | 0.000 | 0.000 | 0.000 | 0.296 | 0.000 | 0.000 | 0.000 | 0.000 | 0.008 | 0.118 | 0.023 | 0.008 | 0.015 | 0.047      |
| E17 | 0.000 | 0.019 | 0.018 | 0.000 | 0.014 | 0.000 | 0.000 | 0.000 | 0.000 | 0.000 | 0.000 | 0.013 | 0.048 | 0.063 | 0.043 | 0.047 | 0.020      |
| E18 | 0.032 | 0.000 | 0.000 | 0.000 | 0.000 | 0.000 | 0.000 | 0.000 | 0.000 | 0.000 | 0.000 | 0.024 | 0.010 | 0.034 | 0.065 | 0.019 | 0.017      |
| E19 | 0.000 | 0.000 | 0.000 | 0.000 | 0.000 | 0.000 | 0.000 | 0.000 | 0.000 | 0.000 | 0.000 | 0.006 | 0.005 | 0.020 | 0.006 | 0.027 | 0.005      |
| E20 | 0.011 | 0.000 | 0.000 | 0.000 | 0.000 | 0.000 | 0.000 | 0.000 | 0.062 | 0.185 | 0.043 | 0.007 | 0.010 | 0.022 | 0.009 | 0.061 | 0.009      |
| E21 | 0.394 | 0.000 | 0.000 | 0.000 | 0.062 | 0.000 | 0.050 | 0.000 | 0.000 | 0.000 | 0.000 | 0.004 | 0.004 | 0.010 | 0.005 | 0.017 | 0.020      |
| E22 | 0.000 | 0.308 | 0.106 | 0.000 | 0.000 | 0.000 | 0.000 | 0.000 | 0.000 | 0.000 | 0.000 | 0.015 | 0.003 | 0.005 | 0.020 | 0.006 | 0.022      |
| E23 | 0.000 | 0.036 | 0.318 | 0.000 | 0.000 | 0.000 | 0.000 | 0.000 | 0.000 | 0.000 | 0.000 | 0.003 | 0.003 | 0.004 | 0.007 | 0.006 | 0.010      |
| E24 | 0.000 | 0.172 | 0.106 | 0.345 | 0.023 | 0.168 | 0.050 | 0.000 | 0.036 | 0.036 | 0.000 | 0.002 | 0.003 | 0.004 | 0.013 | 0.006 | 0.029      |
| E25 | 0.059 | 0.000 | 0.000 | 0.000 | 0.407 | 0.027 | 0.000 | 0.000 | 0.000 | 0.000 | 0.000 | 0.018 | 0.003 | 0.004 | 0.003 | 0.006 | 0.069      |
| E26 | 0.065 | 0.000 | 0.000 | 0.166 | 0.040 | 0.350 | 0.000 | 0.000 | 0.000 | 0.000 | 0.000 | 0.006 | 0.005 | 0.007 | 0.001 | 0.006 | 0.026      |
| E27 | 0.027 | 0.029 | 0.015 | 0.034 | 0.000 | 0.000 | 0.446 | 0.000 | 0.000 | 0.000 | 0.000 | 0.001 | 0.029 | 0.016 | 0.002 | 0.006 | 0.042      |
| E28 | 0.000 | 0.000 | 0.000 | 0.000 | 0.000 | 0.000 | 0.000 | 0.149 | 0.000 | 0.000 | 0.064 | 0.005 | 0.015 | 0.014 | 0.015 | 0.015 | 0.008      |
| E29 | 0.000 | 0.000 | 0.000 | 0.000 | 0.000 | 0.000 | 0.000 | 0.036 | 0.132 | 0.025 | 0.037 | 0.010 | 0.005 | 0.005 | 0.005 | 0.004 | 0.015      |
| E30 | 0.000 | 0.000 | 0.000 | 0.000 | 0.000 | 0.000 | 0.000 | 0.032 | 0.030 | 0.128 | 0.021 | 0.007 | 0.003 | 0.003 | 0.003 | 0.002 | 0.014      |
| E31 | 0.000 | 0.000 | 0.000 | 0.000 | 0.000 | 0.000 | 0.000 | 0.016 | 0.063 | 0.073 | 0.111 | 0.002 | 0.001 | 0.002 | 0.001 | 0.004 | 0.012      |
| E32 | 0.080 | 0.084 | 0.081 | 0.082 | 0.082 | 0.084 | 0.009 | 0.035 | 0.013 | 0.011 | 0.008 | 0.000 | 0.000 | 0.000 | 0.000 | 0.000 | 0.092      |
| E33 | 0.020 | 0.009 | 0.023 | 0.011 | 0.009 | 0.009 | 0.084 | 0.026 | 0.044 | 0.033 | 0.023 | 0.000 | 0.000 | 0.000 | 0.000 | 0.000 | 0.056      |
| E34 | 0.006 | 0.009 | 0.005 | 0.010 | 0.009 | 0.009 | 0.009 | 0.028 | 0.045 | 0.057 | 0.063 | 0.000 | 0.000 | 0.000 | 0.000 | 0.000 | 0.045      |
| E35 | 0.007 | 0.009 | 0.006 | 0.009 | 0.009 | 0.009 | 0.009 | 0.024 | 0.003 | 0.006 | 0.017 | 0.000 | 0.000 | 0.000 | 0.000 | 0.000 | 0.033      |
| E36 | 0.007 | 0.009 | 0.006 | 0.009 | 0.009 | 0.009 | 0.009 | 0.002 | 0.004 | 0.002 | 0.004 | 0.000 | 0.000 | 0.000 | 0.000 | 0.000 | 0.027      |

Table S10. Case 4's X Influence Matrix.

|     | E1 | E2 | E3 | E4 | E5 | E6 | E7 | E8 | E9 | E10 | E11 | E12 | E13 | E14 | E15 | E16 | E17 | E18 | E19 | E20 |
|-----|----|----|----|----|----|----|----|----|----|-----|-----|-----|-----|-----|-----|-----|-----|-----|-----|-----|
| E1  | 0  | 0  | 0  | 0  | 0  | 0  | 0  | 0  | 0  | 0   | 0   | 0   | 0   | 0   | 0   | 0   | 0   | 0   | 0   | 0   |
| E2  | 0  | 0  | 0  | 0  | 0  | 0  | 0  | 0  | 0  | 0   | 0   | 0   | 0   | 0   | 0   | 0   | 0   | 0   | 0   | 1   |
| E3  | 0  | 0  | 0  | 0  | 0  | 0  | 0  | 0  | 0  | 0   | 0   | 0   | 0   | 0   | 0   | 0   | 0   | 0   | 0   | 0   |
| E4  | 0  | 0  | 0  | 0  | 0  | 0  | 0  | 0  | 0  | 0   | 0   | 0   | 0   | 0   | 0   | 0   | 0   | 0   | 0   | 0   |
| E5  | 0  | 0  | 0  | 0  | 0  | 0  | 0  | 0  | 0  | 0   | 0   | 0   | 0   | 0   | 0   | 0   | 0   | 0   | 0   | 0   |
| E6  | 0  | 0  | 0  | 0  | 0  | 0  | 0  | 0  | 0  | 0   | 0   | 0   | 0   | 0   | 0   | 0   | 0   | 0   | 0   | 0   |
| E7  | 1  | 0  | 0  | 0  | 0  | 1  | 1  | 0  | 0  | 0   | 0   | 0   | 1   | 1   | 0   | 0   | 0   | 0   | 0   | 0   |
| E8  | 0  | 1  | 0  | 0  | 0  | 0  | 0  | 1  | 0  | 0   | 0   | 0   | 0   | 0   | 1   | 0   | 0   | 0   | 0   | 0   |
| E9  | 0  | 0  | 0  | 0  | 0  | 0  | 0  | 0  | 1  | 0   | 0   | 0   | 0   | 0   | 0   | 0   | 0   | 0   | 0   | 0   |
| E10 | 0  | 0  | 0  | 0  | 0  | 0  | 0  | 0  | 0  | 1   | 0   | 0   | 0   | 0   | 0   | 1   | 0   | 0   | 2   | 3   |
| E11 | 0  | 0  | 0  | 0  | 0  | 0  | 0  | 0  | 0  | 0   | 1   | 0   | 0   | 0   | 0   | 0   | 0   | 0   | 0   | 0   |
| E12 | 0  | 0  | 0  | 0  | 0  | 0  | 0  | 0  | 0  | 0   | 0   | 2   | 0   | 0   | 0   | 0   | 0   | 0   | 0   | 0   |
| E13 | 0  | 0  | 0  | 0  | 0  | 0  | 1  | 0  | 0  | 0   | 0   | 0   | 2   | 1   | 0   | 0   | 0   | 0   | 0   | 0   |
| E14 | 0  | 0  | 0  | 0  | 0  | 0  | 1  | 1  | 0  | 0   | 0   | 0   | 1   | 1   | 0   | 0   | 0   | 0   | 0   | 1   |
| E15 | 0  | 0  | 0  | 0  | 0  | 0  | 0  | 1  | 0  | 0   | 0   | 0   | 0   | 0   | 3   | 0   | 0   | 0   | 0   | 0   |
| E16 | 0  | 0  | 0  | 0  | 0  | 0  | 0  | 0  | 2  | 3   | 3   | 0   | 0   | 0   | 0   | 4   | 0   | 0   | 0   | 0   |
| E17 | 0  | 0  | 0  | 0  | 0  | 0  | 0  | 0  | 0  | 0   | 0   | 0   | 0   | 0   | 0   | 0   | 3   | 1   | 1   | 0   |
| E18 | 0  | 0  | 0  | 0  | 0  | 0  | 0  | 0  | 0  | 0   | 0   | 0   | 0   | 0   | 0   | 0   | 0   | 3   | 1   | 0   |
| E19 | 0  | 0  | 0  | 0  | 0  | 0  | 0  | 0  | 0  | 0   | 0   | 0   | 0   | 0   | 0   | 0   | 0   | 0   | 4   | 3   |
| E20 | 0  | 0  | 0  | 0  | 0  | 0  | 0  | 0  | 0  | 0   | 0   | 0   | 0   | 0   | 0   | 0   | 0   | 0   | 0   | 3   |
| E21 | 0  | 0  | 0  | 0  | 0  | 0  | 0  | 0  | 0  | 0   | 0   | 0   | 0   | 0   | 0   | 0   | 0   | 0   | 0   | 0   |
| E22 | 0  | 0  | 0  | 0  | 0  | 0  | 1  | 0  | 0  | 0   | 0   | 0   | 2   | 0   | 0   | 0   | 0   | 0   | 0   | 0   |
| E23 | 0  | 0  | 0  | 0  | 0  | 0  | 0  | 0  | 0  | 0   | 0   | 0   | 0   | 0   | 0   | 0   | 0   | 0   | 0   | 0   |
| E24 | 0  | 0  | 0  | 0  | 0  | 0  | 0  | 0  | 0  | 0   | 0   | 0   | 0   | 0   | 0   | 0   | 0   | 0   | 0   | 0   |
| E25 | 0  | 0  | 0  | 0  | 0  | 0  | 2  | 2  | 0  | 0   | 0   | 0   | 2   | 4   | 4   | 0   | 0   | 0   | 0   | 0   |
| E26 | 0  | 0  | 0  | 0  | 0  | 0  | 1  | 0  | 0  | 0   | 0   | 0   | 0   | 0   | 0   | 0   | 0   | 0   | 0   | 0   |
| E27 | 0  | 0  | 0  | 0  | 0  | 0  | 0  | 0  | 4  | 4   | 4   | 0   | 0   | 0   | 0   | 0   | 0   | 0   | 0   | 0   |
| E28 | 0  | 0  | 1  | 2  | 2  | 0  | 0  | 0  | 0  | 0   | 0   | 0   | 0   | 0   | 0   | 0   | 0   | 0   | 0   | 0   |
| E29 | 0  | 1  | 0  | 0  | 0  | 0  | 0  | 0  | 0  | 0   | 0   | 0   | 0   | 0   | 0   | 0   | 0   | 0   | 0   | 0   |
| E30 | 0  | 1  | 0  | 0  | 0  | 0  | 0  | 0  | 0  | 0   | 0   | 0   | 0   | 0   | 0   | 0   | 0   | 0   | 0   | 0   |
| E31 | 0  | 1  | 0  | 0  | 0  | 0  | 0  | 0  | 0  | 0   | 0   | 0   | 0   | 0   | 0   | 0   | 0   | 0   | 0   | 0   |
| E32 | 4  | 1  | 0  | 0  | 0  | 4  | 4  | 4  | 0  | 0   | 0   | 4   | 4   | 4   | 4   | 0   | 0   | 1   | 4   | 4   |
| E33 | 0  | 0  | 0  | 0  | 0  | 1  | 1  | 0  | 4  | 2   | 1   | 0   | 1   | 0   | 0   | 4   | 0   | 1   | 4   | 4   |
| E34 | 0  | 4  | 3  | 4  | 2  | 1  | 0  | 1  | 1  | 4   | 4   | 1   | 0   | 0   | 1   | 0   | 0   | 0   | 1   | 4   |
| E35 | 0  | 0  | 0  | 0  | 0  | 0  | 0  | 0  | 0  | 1   | 2   | 1   | 0   | 0   | 0   | 0   | 4   | 4   | 0   | 1   |
| E36 | 1  | 4  | 4  | 3  | 4  | 1  | 0  | 0  | 0  | 0   | 0   | 0   | 0   | 0   | 0   | 0   | 0   | 0   | 0   | 0   |

Table S10. Case 4's X Influence Matrix (continued).

[illegible]



Table S11. Case 4. Weighted Supermatrix and Priorities, according to procedure 1.

[illegible]

Table S11. Case 4. Weighted Supermatrix and Priorities, according to procedure 1 (continued).

[illegible]

Table S12. Case 4. Weighted Supermatrix and Priorities, according to procedure 2.

|     | E1    | E2    | E3    | E4    | E5    | E6    | E7    | E8    | E9    | E10   | E11   | E12   | E13   | E14   | E15   | E16   | E17   | E18   | E19   | E20   |
|-----|-------|-------|-------|-------|-------|-------|-------|-------|-------|-------|-------|-------|-------|-------|-------|-------|-------|-------|-------|-------|
| E1  | 0.021 | 0.015 | 0.019 | 0.018 | 0.019 | 0.019 | 0.016 | 0.017 | 0.016 | 0.015 | 0.015 | 0.019 | 0.016 | 0.017 | 0.016 | 0.018 | 0.020 | 0.017 | 0.014 | 0.011 |
| E2  | 0.021 | 0.015 | 0.019 | 0.018 | 0.019 | 0.019 | 0.016 | 0.017 | 0.016 | 0.015 | 0.015 | 0.019 | 0.016 | 0.017 | 0.016 | 0.018 | 0.020 | 0.017 | 0.014 | 0.030 |
| E3  | 0.021 | 0.015 | 0.019 | 0.018 | 0.019 | 0.019 | 0.016 | 0.017 | 0.016 | 0.015 | 0.015 | 0.019 | 0.016 | 0.017 | 0.016 | 0.018 | 0.020 | 0.017 | 0.014 | 0.011 |
| E4  | 0.021 | 0.015 | 0.019 | 0.018 | 0.019 | 0.019 | 0.016 | 0.017 | 0.016 | 0.015 | 0.015 | 0.019 | 0.016 | 0.017 | 0.016 | 0.018 | 0.020 | 0.017 | 0.014 | 0.011 |
| E5  | 0.021 | 0.015 | 0.019 | 0.018 | 0.019 | 0.019 | 0.016 | 0.017 | 0.016 | 0.015 | 0.015 | 0.019 | 0.016 | 0.017 | 0.016 | 0.018 | 0.020 | 0.017 | 0.014 | 0.011 |
| E6  | 0.021 | 0.015 | 0.019 | 0.018 | 0.019 | 0.019 | 0.016 | 0.017 | 0.016 | 0.015 | 0.015 | 0.019 | 0.016 | 0.017 | 0.016 | 0.018 | 0.020 | 0.017 | 0.014 | 0.011 |
| E7  | 0.061 | 0.015 | 0.019 | 0.018 | 0.019 | 0.055 | 0.047 | 0.017 | 0.016 | 0.015 | 0.015 | 0.019 | 0.044 | 0.049 | 0.016 | 0.018 | 0.020 | 0.017 | 0.014 | 0.011 |
| E8  | 0.021 | 0.045 | 0.019 | 0.018 | 0.019 | 0.019 | 0.016 | 0.050 | 0.016 | 0.015 | 0.015 | 0.019 | 0.016 | 0.017 | 0.045 | 0.018 | 0.020 | 0.017 | 0.014 | 0.011 |
| E9  | 0.021 | 0.015 | 0.019 | 0.018 | 0.019 | 0.019 | 0.016 | 0.017 | 0.046 | 0.015 | 0.015 | 0.019 | 0.016 | 0.017 | 0.016 | 0.018 | 0.020 | 0.017 | 0.014 | 0.011 |
| E10 | 0.021 | 0.015 | 0.019 | 0.018 | 0.019 | 0.019 | 0.016 | 0.017 | 0.016 | 0.041 | 0.015 | 0.019 | 0.016 | 0.017 | 0.016 | 0.053 | 0.020 | 0.017 | 0.068 | 0.080 |
| E11 | 0.021 | 0.015 | 0.019 | 0.018 | 0.019 | 0.019 | 0.016 | 0.017 | 0.016 | 0.015 | 0.041 | 0.019 | 0.016 | 0.017 | 0.016 | 0.018 | 0.020 | 0.017 | 0.014 | 0.011 |
| E12 | 0.021 | 0.015 | 0.019 | 0.018 | 0.019 | 0.019 | 0.016 | 0.017 | 0.016 | 0.015 | 0.015 | 0.096 | 0.016 | 0.017 | 0.016 | 0.018 | 0.020 | 0.017 | 0.014 | 0.011 |
| E13 | 0.021 | 0.015 | 0.019 | 0.018 | 0.019 | 0.019 | 0.047 | 0.017 | 0.016 | 0.015 | 0.015 | 0.019 | 0.081 | 0.049 | 0.016 | 0.018 | 0.020 | 0.017 | 0.014 | 0.011 |
| E14 | 0.021 | 0.015 | 0.019 | 0.018 | 0.019 | 0.019 | 0.047 | 0.050 | 0.016 | 0.015 | 0.015 | 0.019 | 0.044 | 0.049 | 0.016 | 0.018 | 0.020 | 0.017 | 0.014 | 0.030 |
| E15 | 0.021 | 0.015 | 0.019 | 0.018 | 0.019 | 0.019 | 0.016 | 0.050 | 0.016 | 0.015 | 0.015 | 0.019 | 0.016 | 0.017 | 0.112 | 0.018 | 0.020 | 0.017 | 0.014 | 0.011 |
| E16 | 0.021 | 0.015 | 0.019 | 0.018 | 0.019 | 0.019 | 0.016 | 0.017 | 0.081 | 0.107 | 0.107 | 0.019 | 0.016 | 0.017 | 0.016 | 0.171 | 0.020 | 0.017 | 0.014 | 0.011 |
| E17 | 0.021 | 0.015 | 0.019 | 0.018 | 0.019 | 0.019 | 0.016 | 0.017 | 0.016 | 0.015 | 0.015 | 0.019 | 0.016 | 0.017 | 0.016 | 0.018 | 0.137 | 0.050 | 0.038 | 0.011 |
| E18 | 0.021 | 0.015 | 0.019 | 0.018 | 0.019 | 0.019 | 0.016 | 0.017 | 0.016 | 0.015 | 0.015 | 0.019 | 0.016 | 0.017 | 0.016 | 0.018 | 0.020 | 0.131 | 0.038 | 0.011 |
| E19 | 0.021 | 0.015 | 0.019 | 0.018 | 0.019 | 0.019 | 0.016 | 0.017 | 0.016 | 0.015 | 0.015 | 0.019 | 0.016 | 0.017 | 0.016 | 0.018 | 0.020 | 0.017 | 0.141 | 0.080 |
| E20 | 0.021 | 0.015 | 0.019 | 0.018 | 0.019 | 0.019 | 0.016 | 0.017 | 0.016 | 0.015 | 0.015 | 0.019 | 0.016 | 0.017 | 0.016 | 0.018 | 0.020 | 0.017 | 0.014 | 0.080 |
| E21 | 0.021 | 0.015 | 0.019 | 0.018 | 0.019 | 0.019 | 0.016 | 0.017 | 0.016 | 0.015 | 0.015 | 0.019 | 0.016 | 0.017 | 0.016 | 0.018 | 0.020 | 0.017 | 0.014 | 0.011 |
| E22 | 0.021 | 0.015 | 0.019 | 0.018 | 0.019 | 0.019 | 0.047 | 0.017 | 0.016 | 0.015 | 0.015 | 0.019 | 0.081 | 0.017 | 0.016 | 0.018 | 0.020 | 0.017 | 0.014 | 0.011 |
| E23 | 0.021 | 0.015 | 0.019 | 0.018 | 0.019 | 0.019 | 0.016 | 0.017 | 0.016 | 0.015 | 0.015 | 0.019 | 0.016 | 0.017 | 0.016 | 0.018 | 0.020 | 0.017 | 0.014 | 0.011 |
| E24 | 0.021 | 0.015 | 0.019 | 0.018 | 0.019 | 0.019 | 0.016 | 0.017 | 0.016 | 0.015 | 0.015 | 0.019 | 0.016 | 0.017 | 0.016 | 0.018 | 0.020 | 0.017 | 0.014 | 0.011 |
| E25 | 0.021 | 0.015 | 0.019 | 0.018 | 0.019 | 0.019 | 0.089 | 0.092 | 0.016 | 0.015 | 0.015 | 0.019 | 0.081 | 0.167 | 0.156 | 0.018 | 0.020 | 0.017 | 0.014 | 0.011 |
| E26 | 0.021 | 0.015 | 0.019 | 0.018 | 0.019 | 0.019 | 0.047 | 0.017 | 0.016 | 0.015 | 0.015 | 0.019 | 0.016 | 0.017 | 0.016 | 0.018 | 0.020 | 0.017 | 0.014 | 0.011 |
| E27 | 0.021 | 0.015 | 0.019 | 0.018 | 0.019 | 0.019 | 0.016 | 0.017 | 0.163 | 0.151 | 0.151 | 0.019 | 0.016 | 0.017 | 0.016 | 0.018 | 0.020 | 0.017 | 0.014 | 0.011 |
| E28 | 0.021 | 0.015 | 0.055 | 0.088 | 0.093 | 0.019 | 0.016 | 0.017 | 0.016 | 0.015 | 0.015 | 0.019 | 0.016 | 0.017 | 0.016 | 0.018 | 0.020 | 0.017 | 0.014 | 0.011 |
| E29 | 0.021 | 0.045 | 0.019 | 0.018 | 0.019 | 0.019 | 0.016 | 0.017 | 0.016 | 0.015 | 0.015 | 0.019 | 0.016 | 0.017 | 0.016 | 0.018 | 0.020 | 0.017 | 0.014 | 0.011 |
| E30 | 0.021 | 0.045 | 0.019 | 0.018 | 0.019 | 0.019 | 0.016 | 0.017 | 0.016 | 0.015 | 0.015 | 0.019 | 0.016 | 0.017 | 0.016 | 0.018 | 0.020 | 0.017 | 0.014 | 0.011 |
| E31 | 0.021 | 0.045 | 0.019 | 0.018 | 0.019 | 0.019 | 0.016 | 0.017 | 0.016 | 0.015 | 0.015 | 0.019 | 0.016 | 0.017 | 0.016 | 0.018 | 0.020 | 0.017 | 0.014 | 0.011 |
| E32 | 0.199 | 0.045 | 0.019 | 0.018 | 0.019 | 0.194 | 0.183 | 0.186 | 0.016 | 0.015 | 0.015 | 0.190 | 0.176 | 0.167 | 0.156 | 0.018 | 0.020 | 0.050 | 0.141 | 0.122 |
| E33 | 0.021 | 0.015 | 0.019 | 0.018 | 0.019 | 0.055 | 0.047 | 0.017 | 0.163 | 0.072 | 0.041 | 0.019 | 0.044 | 0.017 | 0.016 | 0.171 | 0.020 | 0.050 | 0.141 | 0.122 |
| E34 | 0.021 | 0.164 | 0.135 | 0.179 | 0.093 | 0.055 | 0.016 | 0.050 | 0.046 | 0.151 | 0.151 | 0.055 | 0.016 | 0.017 | 0.045 | 0.018 | 0.020 | 0.017 | 0.038 | 0.122 |
| E35 | 0.021 | 0.015 | 0.019 | 0.018 | 0.019 | 0.019 | 0.016 | 0.017 | 0.016 | 0.041 | 0.072 | 0.055 | 0.016 | 0.017 | 0.016 | 0.018 | 0.186 | 0.179 | 0.014 | 0.030 |
| E36 | 0.061 | 0.164 | 0.183 | 0.130 | 0.187 | 0.055 | 0.016 | 0.017 | 0.016 | 0.015 | 0.015 | 0.019 | 0.016 | 0.017 | 0.016 | 0.018 | 0.020 | 0.017 | 0.014 | 0.011 |

Table S12. Case 4. Weighted Supermatrix and Priorities, according to procedure 2 (continued).

|     | E21   | E22   | E23   | E24   | E25   | E26   | E27   | E28   | E29   | E30   | E31   | E32   | E33   | E34   | E35   | E36   | Priorities |
|-----|-------|-------|-------|-------|-------|-------|-------|-------|-------|-------|-------|-------|-------|-------|-------|-------|------------|
| E1  | 0.020 | 0.017 | 0.017 | 0.017 | 0.020 | 0.017 | 0.020 | 0.017 | 0.019 | 0.019 | 0.019 | 0.020 | 0.017 | 0.016 | 0.017 | 0.015 | 0.017      |
| E2  | 0.020 | 0.017 | 0.017 | 0.017 | 0.020 | 0.017 | 0.020 | 0.165 | 0.187 | 0.190 | 0.183 | 0.020 | 0.017 | 0.016 | 0.017 | 0.015 | 0.031      |
| E3  | 0.020 | 0.017 | 0.017 | 0.017 | 0.020 | 0.017 | 0.020 | 0.017 | 0.019 | 0.019 | 0.019 | 0.020 | 0.017 | 0.016 | 0.017 | 0.015 | 0.017      |
| E4  | 0.020 | 0.017 | 0.017 | 0.017 | 0.020 | 0.017 | 0.020 | 0.017 | 0.019 | 0.019 | 0.019 | 0.020 | 0.017 | 0.016 | 0.017 | 0.015 | 0.017      |
| E5  | 0.020 | 0.017 | 0.017 | 0.017 | 0.020 | 0.017 | 0.020 | 0.048 | 0.019 | 0.019 | 0.019 | 0.020 | 0.017 | 0.046 | 0.017 | 0.015 | 0.019      |
| E6  | 0.020 | 0.017 | 0.017 | 0.017 | 0.020 | 0.017 | 0.020 | 0.017 | 0.019 | 0.019 | 0.019 | 0.020 | 0.017 | 0.016 | 0.017 | 0.015 | 0.017      |
| E7  | 0.020 | 0.017 | 0.017 | 0.017 | 0.020 | 0.017 | 0.020 | 0.017 | 0.019 | 0.019 | 0.019 | 0.196 | 0.017 | 0.016 | 0.049 | 0.178 | 0.039      |
| E8  | 0.020 | 0.017 | 0.017 | 0.017 | 0.020 | 0.017 | 0.020 | 0.017 | 0.019 | 0.019 | 0.019 | 0.058 | 0.017 | 0.016 | 0.049 | 0.084 | 0.025      |
| E9  | 0.020 | 0.017 | 0.017 | 0.017 | 0.020 | 0.017 | 0.020 | 0.017 | 0.019 | 0.019 | 0.019 | 0.020 | 0.177 | 0.163 | 0.049 | 0.044 | 0.033      |
| E10 | 0.020 | 0.017 | 0.017 | 0.017 | 0.020 | 0.017 | 0.020 | 0.017 | 0.019 | 0.019 | 0.019 | 0.020 | 0.128 | 0.163 | 0.049 | 0.044 | 0.035      |
| E11 | 0.020 | 0.017 | 0.017 | 0.017 | 0.020 | 0.017 | 0.020 | 0.017 | 0.019 | 0.019 | 0.019 | 0.020 | 0.050 | 0.081 | 0.049 | 0.044 | 0.024      |
| E12 | 0.020 | 0.017 | 0.017 | 0.017 | 0.020 | 0.017 | 0.020 | 0.017 | 0.019 | 0.019 | 0.019 | 0.058 | 0.017 | 0.016 | 0.188 | 0.084 | 0.029      |
| E13 | 0.058 | 0.126 | 0.131 | 0.128 | 0.020 | 0.017 | 0.020 | 0.017 | 0.019 | 0.019 | 0.019 | 0.058 | 0.017 | 0.016 | 0.017 | 0.015 | 0.033      |
| E14 | 0.058 | 0.048 | 0.017 | 0.017 | 0.020 | 0.017 | 0.020 | 0.165 | 0.093 | 0.019 | 0.135 | 0.020 | 0.017 | 0.016 | 0.049 | 0.015 | 0.031      |
| E15 | 0.020 | 0.017 | 0.017 | 0.017 | 0.099 | 0.128 | 0.020 | 0.017 | 0.019 | 0.019 | 0.019 | 0.020 | 0.017 | 0.016 | 0.017 | 0.015 | 0.027      |
| E16 | 0.020 | 0.017 | 0.017 | 0.017 | 0.020 | 0.017 | 0.137 | 0.017 | 0.019 | 0.019 | 0.019 | 0.020 | 0.086 | 0.016 | 0.017 | 0.015 | 0.038      |
| E17 | 0.020 | 0.017 | 0.017 | 0.017 | 0.020 | 0.017 | 0.020 | 0.017 | 0.019 | 0.019 | 0.019 | 0.020 | 0.017 | 0.046 | 0.017 | 0.044 | 0.024      |
| E18 | 0.020 | 0.017 | 0.017 | 0.017 | 0.020 | 0.017 | 0.020 | 0.017 | 0.019 | 0.019 | 0.019 | 0.020 | 0.017 | 0.016 | 0.049 | 0.015 | 0.021      |
| E19 | 0.020 | 0.017 | 0.017 | 0.017 | 0.020 | 0.017 | 0.020 | 0.017 | 0.019 | 0.019 | 0.019 | 0.020 | 0.017 | 0.016 | 0.017 | 0.015 | 0.022      |
| E20 | 0.020 | 0.017 | 0.017 | 0.017 | 0.020 | 0.017 | 0.020 | 0.017 | 0.019 | 0.096 | 0.019 | 0.020 | 0.017 | 0.016 | 0.017 | 0.044 | 0.021      |
| E21 | 0.196 | 0.017 | 0.017 | 0.017 | 0.020 | 0.017 | 0.020 | 0.017 | 0.019 | 0.019 | 0.019 | 0.020 | 0.017 | 0.016 | 0.017 | 0.015 | 0.021      |
| E22 | 0.020 | 0.175 | 0.050 | 0.017 | 0.020 | 0.017 | 0.020 | 0.017 | 0.019 | 0.019 | 0.019 | 0.020 | 0.017 | 0.016 | 0.017 | 0.015 | 0.025      |
| E23 | 0.020 | 0.017 | 0.179 | 0.017 | 0.020 | 0.017 | 0.020 | 0.017 | 0.019 | 0.019 | 0.019 | 0.020 | 0.017 | 0.016 | 0.017 | 0.015 | 0.021      |
| E24 | 0.020 | 0.084 | 0.050 | 0.177 | 0.020 | 0.086 | 0.020 | 0.017 | 0.019 | 0.019 | 0.019 | 0.020 | 0.017 | 0.016 | 0.017 | 0.015 | 0.025      |
| E25 | 0.020 | 0.017 | 0.017 | 0.017 | 0.193 | 0.017 | 0.020 | 0.017 | 0.019 | 0.019 | 0.019 | 0.020 | 0.017 | 0.016 | 0.017 | 0.015 | 0.040      |
| E26 | 0.020 | 0.017 | 0.017 | 0.086 | 0.020 | 0.177 | 0.020 | 0.017 | 0.019 | 0.019 | 0.019 | 0.020 | 0.017 | 0.016 | 0.017 | 0.015 | 0.024      |
| E27 | 0.020 | 0.017 | 0.017 | 0.017 | 0.020 | 0.017 | 0.186 | 0.017 | 0.019 | 0.019 | 0.019 | 0.020 | 0.017 | 0.016 | 0.017 | 0.015 | 0.036      |
| E28 | 0.020 | 0.017 | 0.017 | 0.017 | 0.020 | 0.017 | 0.020 | 0.083 | 0.019 | 0.019 | 0.019 | 0.020 | 0.017 | 0.016 | 0.017 | 0.015 | 0.022      |
| E29 | 0.020 | 0.017 | 0.017 | 0.017 | 0.020 | 0.017 | 0.020 | 0.017 | 0.093 | 0.019 | 0.019 | 0.020 | 0.017 | 0.016 | 0.017 | 0.015 | 0.020      |
| E30 | 0.020 | 0.017 | 0.017 | 0.017 | 0.020 | 0.017 | 0.020 | 0.017 | 0.019 | 0.055 | 0.019 | 0.020 | 0.017 | 0.016 | 0.017 | 0.015 | 0.019      |
| E31 | 0.020 | 0.017 | 0.017 | 0.017 | 0.020 | 0.017 | 0.020 | 0.017 | 0.019 | 0.055 | 0.055 | 0.020 | 0.017 | 0.016 | 0.017 | 0.015 | 0.020      |
| E32 | 0.058 | 0.048 | 0.050 | 0.050 | 0.057 | 0.050 | 0.020 | 0.017 | 0.019 | 0.019 | 0.019 | 0.020 | 0.017 | 0.016 | 0.017 | 0.015 | 0.065      |
| E33 | 0.020 | 0.017 | 0.017 | 0.017 | 0.020 | 0.017 | 0.020 | 0.017 | 0.019 | 0.019 | 0.019 | 0.020 | 0.017 | 0.016 | 0.017 | 0.015 | 0.039      |
| E34 | 0.020 | 0.017 | 0.017 | 0.017 | 0.020 | 0.017 | 0.020 | 0.017 | 0.019 | 0.019 | 0.019 | 0.020 | 0.017 | 0.016 | 0.017 | 0.015 | 0.043      |
| E35 | 0.020 | 0.017 | 0.017 | 0.017 | 0.020 | 0.017 | 0.020 | 0.017 | 0.019 | 0.019 | 0.019 | 0.020 | 0.017 | 0.016 | 0.017 | 0.015 | 0.028      |
| E36 | 0.020 | 0.017 | 0.017 | 0.017 | 0.020 | 0.017 | 0.020 | 0.017 | 0.019 | 0.019 | 0.019 | 0.020 | 0.017 | 0.016 | 0.017 | 0.015 | 0.031      |

Table S13. Case 5. Original Weighted Supermatrix and Priorities.

[illegible]

Table S13. Case 5. Original Weighted Supermatrix and Priorities (continued).

|     | E21   | E22   | E23   | E24   | E25   | E26   | E27   | E28   | E29   | E30   | E31   | E32   | E33   | E34   | Priorities |
|-----|-------|-------|-------|-------|-------|-------|-------|-------|-------|-------|-------|-------|-------|-------|------------|
| E1  | 0.000 | 0.100 | 0.000 | 0.061 | 0.037 | 0.014 | 0.000 | 0.000 | 0.000 | 0.000 | 0.012 | 0.028 | 0.000 | 0.045 | 0.014517   |
| E2  | 0.000 | 0.033 | 0.149 | 0.000 | 0.037 | 0.078 | 0.000 | 0.000 | 0.000 | 0.000 | 0.020 | 0.041 | 0.000 | 0.029 | 0.023      |
| E3  | 0.000 | 0.000 | 0.000 | 0.000 | 0.037 | 0.078 | 0.000 | 0.000 | 0.000 | 0.000 | 0.073 | 0.016 | 0.000 | 0.022 | 0.009      |
| E4  | 0.000 | 0.000 | 0.000 | 0.122 | 0.037 | 0.030 | 0.000 | 0.000 | 0.000 | 0.000 | 0.037 | 0.041 | 0.000 | 0.047 | 0.018      |
| E5  | 0.000 | 0.000 | 0.151 | 0.000 | 0.040 | 0.000 | 0.081 | 0.000 | 0.000 | 0.000 | 0.026 | 0.015 | 0.016 | 0.029 | 0.026      |
| E6  | 0.000 | 0.113 | 0.000 | 0.000 | 0.040 | 0.000 | 0.016 | 0.000 | 0.000 | 0.000 | 0.020 | 0.009 | 0.060 | 0.029 | 0.021      |
| E7  | 0.000 | 0.023 | 0.000 | 0.000 | 0.040 | 0.000 | 0.018 | 0.000 | 0.000 | 0.000 | 0.020 | 0.010 | 0.046 | 0.029 | 0.017      |
| E8  | 0.000 | 0.000 | 0.000 | 0.000 | 0.040 | 0.000 | 0.067 | 0.000 | 0.000 | 0.000 | 0.060 | 0.022 | 0.030 | 0.029 | 0.019      |
| E9  | 0.000 | 0.000 | 0.000 | 0.000 | 0.040 | 0.000 | 0.018 | 0.000 | 0.000 | 0.000 | 0.017 | 0.068 | 0.015 | 0.029 | 0.017      |
| E10 | 0.000 | 0.014 | 0.000 | 0.000 | 0.044 | 0.050 | 0.056 | 0.250 | 0.000 | 0.000 | 0.057 | 0.048 | 0.046 | 0.053 | 0.036      |
| E11 | 0.000 | 0.086 | 0.125 | 0.000 | 0.044 | 0.150 | 0.117 | 0.000 | 0.000 | 0.000 | 0.029 | 0.054 | 0.081 | 0.053 | 0.051      |
| E12 | 0.000 | 0.035 | 0.025 | 0.000 | 0.044 | 0.000 | 0.000 | 0.000 | 0.000 | 0.000 | 0.029 | 0.011 | 0.020 | 0.021 | 0.014      |
| E13 | 0.000 | 0.000 | 0.000 | 0.000 | 0.044 | 0.000 | 0.027 | 0.000 | 0.000 | 0.000 | 0.029 | 0.011 | 0.020 | 0.015 | 0.012      |
| E14 | 0.000 | 0.017 | 0.000 | 0.030 | 0.025 | 0.000 | 0.000 | 0.000 | 0.019 | 0.000 | 0.029 | 0.025 | 0.033 | 0.029 | 0.014      |
| E15 | 0.000 | 0.082 | 0.045 | 0.097 | 0.025 | 0.000 | 0.000 | 0.000 | 0.123 | 0.000 | 0.029 | 0.025 | 0.033 | 0.029 | 0.034      |
| E16 | 0.000 | 0.033 | 0.000 | 0.065 | 0.025 | 0.000 | 0.000 | 0.000 | 0.056 | 0.000 | 0.029 | 0.025 | 0.033 | 0.029 | 0.022      |
| E17 | 0.000 | 0.086 | 0.000 | 0.097 | 0.025 | 0.000 | 0.000 | 0.000 | 0.079 | 0.000 | 0.029 | 0.025 | 0.033 | 0.029 | 0.030      |
| E18 | 0.000 | 0.020 | 0.223 | 0.039 | 0.025 | 0.000 | 0.000 | 0.000 | 0.056 | 0.000 | 0.029 | 0.025 | 0.033 | 0.029 | 0.032      |
| E19 | 0.167 | 0.000 | 0.000 | 0.000 | 0.017 | 0.000 | 0.000 | 0.000 | 0.000 | 0.250 | 0.000 | 0.042 | 0.000 | 0.000 | 0.011      |
| E20 | 0.167 | 0.000 | 0.000 | 0.000 | 0.017 | 0.200 | 0.000 | 0.000 | 0.000 | 0.000 | 0.000 | 0.042 | 0.000 | 0.000 | 0.015      |
| E21 | 0.000 | 0.000 | 0.000 | 0.000 | 0.017 | 0.000 | 0.000 | 0.000 | 0.000 | 0.250 | 0.000 | 0.042 | 0.000 | 0.000 | 0.013      |
| E22 | 0.000 | 0.000 | 0.000 | 0.121 | 0.024 | 0.000 | 0.000 | 0.000 | 0.143 | 0.000 | 0.061 | 0.042 | 0.071 | 0.061 | 0.061      |
| E23 | 0.000 | 0.106 | 0.000 | 0.024 | 0.024 | 0.200 | 0.200 | 0.250 | 0.143 | 0.000 | 0.061 | 0.042 | 0.071 | 0.061 | 0.071      |
| E24 | 0.000 | 0.000 | 0.000 | 0.000 | 0.024 | 0.000 | 0.000 | 0.000 | 0.048 | 0.000 | 0.020 | 0.042 | 0.024 | 0.020 | 0.016      |
| E25 | 0.000 | 0.000 | 0.000 | 0.000 | 0.000 | 0.000 | 0.200 | 0.250 | 0.000 | 0.000 | 0.143 | 0.125 | 0.167 | 0.143 | 0.041      |
| E26 | 0.000 | 0.000 | 0.033 | 0.000 | 0.000 | 0.000 | 0.000 | 0.000 | 0.000 | 0.000 | 0.066 | 0.007 | 0.011 | 0.019 | 0.039      |
| E27 | 0.000 | 0.000 | 0.034 | 0.000 | 0.000 | 0.000 | 0.000 | 0.000 | 0.000 | 0.000 | 0.018 | 0.016 | 0.077 | 0.024 | 0.048      |
| E28 | 0.000 | 0.000 | 0.017 | 0.000 | 0.112 | 0.000 | 0.000 | 0.000 | 0.000 | 0.000 | 0.013 | 0.037 | 0.012 | 0.019 | 0.015      |
| E29 | 0.000 | 0.139 | 0.071 | 0.190 | 0.000 | 0.000 | 0.000 | 0.000 | 0.000 | 0.000 | 0.040 | 0.057 | 0.054 | 0.072 | 0.059      |
| E30 | 0.333 | 0.000 | 0.000 | 0.000 | 0.000 | 0.000 | 0.000 | 0.000 | 0.000 | 0.000 | 0.006 | 0.008 | 0.012 | 0.008 | 0.010      |
| E31 | 0.027 | 0.028 | 0.047 | 0.087 | 0.028 | 0.103 | 0.014 | 0.056 | 0.083 | 0.052 | 0.000 | 0.000 | 0.000 | 0.000 | 0.039      |
| E32 | 0.232 | 0.028 | 0.055 | 0.015 | 0.028 | 0.045 | 0.045 | 0.122 | 0.083 | 0.338 | 0.000 | 0.000 | 0.000 | 0.000 | 0.074      |
| E33 | 0.047 | 0.028 | 0.008 | 0.015 | 0.028 | 0.014 | 0.125 | 0.032 | 0.083 | 0.057 | 0.000 | 0.000 | 0.000 | 0.000 | 0.043      |
| E34 | 0.027 | 0.028 | 0.017 | 0.039 | 0.028 | 0.039 | 0.017 | 0.041 | 0.083 | 0.052 | 0.000 | 0.000 | 0.000 | 0.000 | 0.038      |

Table S14. Case 5's X Influence Matrix.

|     | E1 | E2 | E3 | E4 | E5 | E6 | E7 | E8 | E9 | E10 | E11 | E12 | E13 | E14 | E15 | E16 | E17 | E18 | E19 | E20 |
|-----|----|----|----|----|----|----|----|----|----|-----|-----|-----|-----|-----|-----|-----|-----|-----|-----|-----|
| E1  | 0  | 0  | 2  | 0  | 0  | 0  | 0  | 0  | 0  | 0   | 0   | 0   | 0   | 0   | 0   | 0   | 0   | 0   | 0   | 0   |
| E2  | 0  | 0  | 2  | 0  | 0  | 0  | 0  | 0  | 0  | 0   | 0   | 0   | 0   | 0   | 0   | 0   | 0   | 0   | 0   | 0   |
| E3  | 0  | 0  | 0  | 0  | 0  | 0  | 0  | 0  | 0  | 0   | 0   | 0   | 0   | 0   | 0   | 0   | 0   | 0   | 0   | 0   |
| E4  | 4  | 0  | 2  | 0  | 0  | 0  | 0  | 0  | 0  | 0   | 0   | 0   | 0   | 0   | 0   | 0   | 0   | 0   | 0   | 0   |
| E5  | 0  | 0  | 0  | 0  | 0  | 1  | 0  | 3  | 1  | 0   | 0   | 0   | 0   | 0   | 0   | 0   | 0   | 0   | 0   | 0   |
| E6  | 0  | 0  | 0  | 0  | 1  | 0  | 2  | 1  | 2  | 0   | 0   | 0   | 0   | 0   | 0   | 0   | 0   | 0   | 0   | 0   |
| E7  | 0  | 0  | 0  | 0  | 1  | 3  | 0  | 1  | 2  | 0   | 0   | 0   | 0   | 0   | 0   | 0   | 0   | 0   | 0   | 0   |
| E8  | 0  | 0  | 0  | 0  | 3  | 1  | 1  | 0  | 1  | 0   | 0   | 0   | 0   | 0   | 0   | 0   | 0   | 0   | 0   | 0   |
| E9  | 0  | 0  | 0  | 0  | 1  | 1  | 2  | 1  | 0  | 0   | 0   | 0   | 0   | 0   | 0   | 0   | 0   | 0   | 0   | 0   |
| E10 | 0  | 0  | 0  | 0  | 0  | 0  | 0  | 0  | 0  | 0   | 4   | 4   | 2   | 0   | 0   | 0   | 0   | 0   | 0   | 0   |
| E11 | 0  | 0  | 0  | 0  | 0  | 0  | 0  | 0  | 0  | 4   | 0   | 2   | 2   | 0   | 0   | 0   | 0   | 0   | 0   | 0   |
| E12 | 0  | 0  | 0  | 0  | 0  | 0  | 0  | 0  | 0  | 0   | 0   | 0   | 2   | 0   | 0   | 0   | 0   | 0   | 0   | 0   |
| E13 | 0  | 0  | 0  | 0  | 0  | 0  | 0  | 0  | 0  | 0   | 1   | 1   | 0   | 0   | 0   | 0   | 0   | 0   | 0   | 0   |
| E14 | 0  | 0  | 0  | 0  | 0  | 0  | 0  | 0  | 0  | 0   | 0   | 0   | 0   | 0   | 0   | 0   | 0   | 1   | 0   | 0   |
| E15 | 0  | 0  | 0  | 0  | 0  | 0  | 0  | 0  | 0  | 0   | 0   | 0   | 0   | 1   | 0   | 2   | 2   | 1   | 0   | 0   |
| E16 | 0  | 0  | 0  | 0  | 0  | 0  | 0  | 0  | 0  | 0   | 0   | 0   | 0   | 1   | 1   | 0   | 2   | 1   | 0   | 0   |
| E17 | 0  | 0  | 0  | 0  | 0  | 0  | 0  | 0  | 0  | 0   | 0   | 0   | 0   | 1   | 3   | 2   | 0   | 1   | 0   | 0   |
| E18 | 0  | 0  | 0  | 0  | 0  | 0  | 0  | 0  | 0  | 0   | 0   | 0   | 0   | 1   | 0   | 0   | 0   | 0   | 0   | 0   |
| E19 | 0  | 0  | 0  | 0  | 0  | 0  | 0  | 0  | 0  | 0   | 0   | 0   | 0   | 0   | 0   | 0   | 0   | 0   | 0   | 3   |
| E20 | 0  | 0  | 0  | 0  | 0  | 0  | 0  | 0  | 0  | 0   | 0   | 0   | 0   | 0   | 0   | 0   | 0   | 0   | 1   | 0   |
| E21 | 0  | 0  | 0  | 0  | 0  | 0  | 0  | 0  | 0  | 0   | 0   | 0   | 0   | 0   | 0   | 0   | 0   | 0   | 3   | 1   |
| E22 | 0  | 3  | 0  | 0  | 0  | 3  | 3  | 0  | 3  | 0   | 0   | 4   | 0   | 4   | 3   | 3   | 3   | 0   | 0   | 0   |
| E23 | 0  | 0  | 0  | 3  | 3  | 0  | 0  | 0  | 0  | 0   | 3   | 0   | 0   | 0   | 0   | 0   | 0   | 3   | 0   | 0   |
| E24 | 0  | 0  | 0  | 0  | 0  | 0  | 0  | 0  | 0  | 0   | 1   | 0   | 0   | 0   | 1   | 1   | 0   | 0   | 0   | 0   |
| E25 | 0  | 0  | 0  | 0  | 0  | 0  | 0  | 0  | 0  | 0   | 0   | 0   | 0   | 0   | 0   | 0   | 0   | 0   | 0   | 0   |
| E26 | 3  | 4  | 4  | 4  | 0  | 0  | 0  | 0  | 0  | 1   | 1   | 0   | 0   | 0   | 0   | 0   | 0   | 0   | 0   | 4   |
| E27 | 0  | 0  | 0  | 0  | 4  | 4  | 4  | 4  | 4  | 2   | 3   | 0   | 4   | 0   | 0   | 0   | 0   | 0   | 0   | 0   |
| E28 | 0  | 0  | 0  | 0  | 0  | 0  | 0  | 0  | 0  | 2   | 0   | 0   | 0   | 0   | 0   | 0   | 0   | 0   | 0   | 0   |
| E29 | 0  | 0  | 0  | 0  | 0  | 0  | 0  | 0  | 0  | 0   | 0   | 0   | 0   | 4   | 4   | 4   | 4   | 4   | 0   | 0   |
| E30 | 0  | 0  | 0  | 0  | 0  | 0  | 0  | 0  | 0  | 0   | 0   | 0   | 0   | 0   | 0   | 0   | 0   | 0   | 4   | 0   |
| E31 | 0  | 0  | 2  | 1  | 0  | 0  | 0  | 0  | 0  | 0   | 0   | 0   | 1   | 1   | 1   | 1   | 1   | 1   | 0   | 0   |
| E32 | 2  | 3  | 1  | 1  | 2  | 1  | 1  | 1  | 2  | 2   | 4   | 2   | 2   | 1   | 1   | 1   | 1   | 1   | 3   | 3   |
| E33 | 0  | 0  | 0  | 0  | 1  | 2  | 2  | 2  | 1  | 0   | 0   | 2   | 0   | 1   | 1   | 1   | 1   | 1   | 0   | 0   |
| E34 | 0  | 0  | 0  | 0  | 0  | 0  | 0  | 0  | 0  | 1   | 0   | 0   | 0   | 1   | 1   | 1   | 1   | 1   | 0   | 0   |

Table S14. Case 5's X Influence Matrix (continued).

|     | E21 | E22 | E23 | E24 | E25 | E26 | E27 | E28 | E29 | E30 | E31 | E32 | E33 | E34 |
|-----|-----|-----|-----|-----|-----|-----|-----|-----|-----|-----|-----|-----|-----|-----|
| E1  | 0   | 3   | 0   | 1   | 1   | 0   | 0   | 0   | 0   | 0   | 0   | 1   | 0   | 1   |
| E2  | 0   | 1   | 3   | 0   | 1   | 1   | 0   | 0   | 0   | 0   | 0   | 1   | 0   | 1   |
| E3  | 0   | 0   | 0   | 0   | 1   | 1   | 0   | 0   | 0   | 0   | 2   | 0   | 0   | 0   |
| E4  | 0   | 0   | 0   | 3   | 1   | 0   | 0   | 0   | 0   | 0   | 1   | 1   | 0   | 1   |
| E5  | 0   | 0   | 3   | 0   | 1   | 0   | 2   | 0   | 0   | 0   | 0   | 0   | 0   | 0   |
| E6  | 0   | 4   | 0   | 0   | 1   | 0   | 0   | 0   | 0   | 0   | 0   | 0   | 1   | 0   |
| E7  | 0   | 0   | 0   | 0   | 1   | 0   | 0   | 0   | 0   | 0   | 0   | 0   | 1   | 0   |
| E8  | 0   | 0   | 0   | 0   | 1   | 0   | 1   | 0   | 0   | 0   | 2   | 0   | 0   | 0   |
| E9  | 0   | 0   | 0   | 0   | 1   | 0   | 0   | 0   | 0   | 0   | 0   | 2   | 0   | 0   |
| E10 | 0   | 0   | 0   | 0   | 1   | 1   | 1   | 4   | 0   | 0   | 2   | 1   | 1   | 1   |
| E11 | 0   | 3   | 2   | 0   | 1   | 3   | 2   | 0   | 0   | 0   | 0   | 2   | 2   | 1   |
| E12 | 0   | 1   | 0   | 0   | 1   | 0   | 0   | 0   | 0   | 0   | 0   | 0   | 0   | 0   |
| E13 | 0   | 0   | 0   | 0   | 1   | 0   | 0   | 0   | 0   | 0   | 0   | 0   | 0   | 0   |
| E14 | 0   | 0   | 0   | 0   | 1   | 0   | 0   | 0   | 0   | 0   | 0   | 1   | 0   | 0   |
| E15 | 0   | 2   | 0   | 2   | 1   | 0   | 0   | 0   | 4   | 0   | 0   | 1   | 0   | 0   |
| E16 | 0   | 1   | 0   | 1   | 1   | 0   | 0   | 0   | 1   | 0   | 0   | 1   | 0   | 0   |
| E17 | 0   | 3   | 0   | 2   | 1   | 0   | 0   | 0   | 2   | 0   | 0   | 1   | 0   | 0   |
| E18 | 0   | 0   | 4   | 1   | 1   | 0   | 0   | 0   | 1   | 0   | 0   | 1   | 0   | 0   |
| E19 | 2   | 0   | 0   | 0   | 0   | 0   | 0   | 0   | 0   | 3   | 0   | 1   | 0   | 0   |
| E20 | 2   | 0   | 0   | 0   | 0   | 4   | 0   | 0   | 0   | 0   | 0   | 1   | 0   | 0   |
| E21 | 0   | 0   | 0   | 0   | 0   | 0   | 0   | 0   | 0   | 3   | 0   | 1   | 0   | 0   |
| E22 | 0   | 0   | 0   | 3   | 1   | 0   | 0   | 0   | 4   | 0   | 2   | 1   | 2   | 2   |
| E23 | 0   | 3   | 0   | 0   | 1   | 4   | 4   | 4   | 4   | 0   | 2   | 1   | 2   | 2   |
| E24 | 0   | 0   | 0   | 0   | 1   | 0   | 0   | 0   | 1   | 0   | 0   | 1   | 0   | 0   |
| E25 | 0   | 0   | 0   | 0   | 0   | 0   | 4   | 4   | 0   | 0   | 4   | 4   | 4   | 4   |
| E26 | 0   | 0   | 0   | 0   | 0   | 0   | 0   | 0   | 0   | 0   | 2   | 0   | 0   | 0   |
| E27 | 0   | 0   | 0   | 0   | 0   | 0   | 0   | 0   | 0   | 0   | 0   | 0   | 2   | 0   |
| E28 | 0   | 0   | 0   | 0   | 4   | 0   | 0   | 0   | 0   | 0   | 0   | 1   | 0   | 0   |
| E29 | 0   | 4   | 1   | 4   | 0   | 0   | 0   | 0   | 0   | 0   | 1   | 2   | 1   | 2   |
| E30 | 4   | 0   | 0   | 0   | 0   | 0   | 0   | 0   | 0   | 0   | 0   | 0   | 0   | 0   |
| E31 | 0   | 1   | 1   | 2   | 1   | 2   | 0   | 1   | 2   | 0   | 0   | 0   | 0   | 0   |
| E32 | 3   | 1   | 1   | 0   | 1   | 1   | 1   | 2   | 2   | 4   | 0   | 0   | 0   | 0   |
| E33 | 0   | 1   | 0   | 0   | 1   | 0   | 3   | 0   | 2   | 0   | 0   | 0   | 0   | 0   |
| E34 | 0   | 1   | 0   | 1   | 1   | 0   | 0   | 0   | 2   | 0   | 0   | 0   | 0   | 0   |



Table S15. Case 5. Weighted Supermatrix and Priorities, according to procedure 1.

|     | E1    | E2    | E3    | E4    | E5    | E6    | E7    | E8    | E9    | E10   | E11   | E12   | E13   | E14   | E15   | E16   | E17   | E18   | E19   | E20   |
|-----|-------|-------|-------|-------|-------|-------|-------|-------|-------|-------|-------|-------|-------|-------|-------|-------|-------|-------|-------|-------|
| E1  | 0.000 | 0.000 | 0.113 | 0.000 | 0.000 | 0.000 | 0.000 | 0.000 | 0.000 | 0.000 | 0.000 | 0.000 | 0.000 | 0.000 | 0.000 | 0.000 | 0.000 | 0.000 | 0.000 | 0.000 |
| E2  | 0.000 | 0.000 | 0.113 | 0.000 | 0.000 | 0.000 | 0.000 | 0.000 | 0.000 | 0.000 | 0.000 | 0.000 | 0.000 | 0.000 | 0.000 | 0.000 | 0.000 | 0.000 | 0.000 | 0.000 |
| E3  | 0.000 | 0.000 | 0.000 | 0.000 | 0.000 | 0.000 | 0.000 | 0.000 | 0.000 | 0.000 | 0.000 | 0.000 | 0.000 | 0.000 | 0.000 | 0.000 | 0.000 | 0.000 | 0.000 | 0.000 |
| E4  | 0.637 | 0.000 | 0.113 | 0.000 | 0.000 | 0.000 | 0.000 | 0.000 | 0.000 | 0.000 | 0.000 | 0.000 | 0.000 | 0.000 | 0.000 | 0.000 | 0.000 | 0.000 | 0.000 | 0.000 |
| E5  | 0.000 | 0.000 | 0.000 | 0.000 | 0.000 | 0.038 | 0.000 | 0.242 | 0.037 | 0.000 | 0.000 | 0.000 | 0.000 | 0.000 | 0.000 | 0.000 | 0.000 | 0.000 | 0.000 | 0.000 |
| E6  | 0.000 | 0.000 | 0.000 | 0.000 | 0.038 | 0.000 | 0.093 | 0.049 | 0.094 | 0.000 | 0.000 | 0.000 | 0.000 | 0.000 | 0.000 | 0.000 | 0.000 | 0.000 | 0.000 | 0.000 |
| E7  | 0.000 | 0.000 | 0.000 | 0.000 | 0.038 | 0.190 | 0.000 | 0.049 | 0.094 | 0.000 | 0.000 | 0.000 | 0.000 | 0.000 | 0.000 | 0.000 | 0.000 | 0.000 | 0.000 | 0.000 |
| E8  | 0.000 | 0.000 | 0.000 | 0.000 | 0.190 | 0.038 | 0.038 | 0.000 | 0.037 | 0.000 | 0.000 | 0.000 | 0.000 | 0.000 | 0.000 | 0.000 | 0.000 | 0.000 | 0.000 | 0.000 |
| E9  | 0.000 | 0.000 | 0.000 | 0.000 | 0.038 | 0.038 | 0.093 | 0.049 | 0.000 | 0.000 | 0.000 | 0.000 | 0.000 | 0.000 | 0.000 | 0.000 | 0.000 | 0.000 | 0.000 | 0.000 |
| E10 | 0.000 | 0.000 | 0.000 | 0.000 | 0.000 | 0.000 | 0.000 | 0.000 | 0.000 | 0.000 | 0.307 | 0.360 | 0.113 | 0.000 | 0.000 | 0.000 | 0.000 | 0.000 | 0.000 | 0.000 |
| E11 | 0.000 | 0.000 | 0.000 | 0.000 | 0.000 | 0.000 | 0.000 | 0.000 | 0.000 | 0.515 | 0.000 | 0.081 | 0.113 | 0.000 | 0.000 | 0.000 | 0.000 | 0.000 | 0.000 | 0.000 |
| E12 | 0.000 | 0.000 | 0.000 | 0.000 | 0.000 | 0.000 | 0.000 | 0.000 | 0.000 | 0.000 | 0.000 | 0.000 | 0.113 | 0.000 | 0.000 | 0.000 | 0.000 | 0.000 | 0.000 | 0.000 |
| E13 | 0.000 | 0.000 | 0.000 | 0.000 | 0.000 | 0.000 | 0.000 | 0.000 | 0.000 | 0.000 | 0.035 | 0.036 | 0.000 | 0.000 | 0.000 | 0.000 | 0.000 | 0.000 | 0.000 | 0.000 |
| E14 | 0.000 | 0.000 | 0.000 | 0.000 | 0.000 | 0.000 | 0.000 | 0.000 | 0.000 | 0.000 | 0.000 | 0.000 | 0.000 | 0.000 | 0.000 | 0.000 | 0.000 | 0.049 | 0.000 | 0.000 |
| E15 | 0.000 | 0.000 | 0.000 | 0.000 | 0.000 | 0.000 | 0.000 | 0.000 | 0.000 | 0.000 | 0.000 | 0.000 | 0.000 | 0.045 | 0.000 | 0.104 | 0.105 | 0.049 | 0.000 | 0.000 |
| E16 | 0.000 | 0.000 | 0.000 | 0.000 | 0.000 | 0.000 | 0.000 | 0.000 | 0.000 | 0.000 | 0.000 | 0.000 | 0.000 | 0.045 | 0.042 | 0.000 | 0.105 | 0.049 | 0.000 | 0.000 |
| E17 | 0.000 | 0.000 | 0.000 | 0.000 | 0.000 | 0.000 | 0.000 | 0.000 | 0.000 | 0.000 | 0.000 | 0.000 | 0.000 | 0.045 | 0.194 | 0.104 | 0.000 | 0.049 | 0.000 | 0.000 |
| E18 | 0.000 | 0.000 | 0.000 | 0.000 | 0.000 | 0.000 | 0.000 | 0.000 | 0.000 | 0.000 | 0.000 | 0.000 | 0.000 | 0.045 | 0.000 | 0.000 | 0.000 | 0.000 | 0.000 | 0.000 |
| E19 | 0.000 | 0.000 | 0.000 | 0.000 | 0.000 | 0.000 | 0.000 | 0.000 | 0.000 | 0.000 | 0.000 | 0.000 | 0.000 | 0.000 | 0.000 | 0.000 | 0.000 | 0.000 | 0.000 | 0.210 |
| E20 | 0.000 | 0.000 | 0.000 | 0.000 | 0.000 | 0.000 | 0.000 | 0.000 | 0.000 | 0.000 | 0.000 | 0.000 | 0.000 | 0.000 | 0.000 | 0.000 | 0.000 | 0.000 | 0.052 | 0.000 |
| E21 | 0.000 | 0.000 | 0.000 | 0.000 | 0.000 | 0.000 | 0.000 | 0.000 | 0.000 | 0.000 | 0.000 | 0.000 | 0.000 | 0.000 | 0.000 | 0.000 | 0.000 | 0.000 | 0.210 | 0.052 |
| E22 | 0.000 | 0.200 | 0.000 | 0.000 | 0.000 | 0.190 | 0.221 | 0.000 | 0.214 | 0.000 | 0.000 | 0.360 | 0.000 | 0.318 | 0.194 | 0.214 | 0.222 | 0.000 | 0.000 | 0.000 |
| E23 | 0.000 | 0.000 | 0.000 | 0.282 | 0.190 | 0.000 | 0.000 | 0.000 | 0.000 | 0.000 | 0.141 | 0.000 | 0.000 | 0.000 | 0.000 | 0.000 | 0.000 | 0.230 | 0.000 | 0.000 |
| E24 | 0.000 | 0.000 | 0.000 | 0.000 | 0.000 | 0.000 | 0.000 | 0.000 | 0.000 | 0.000 | 0.035 | 0.000 | 0.000 | 0.000 | 0.042 | 0.040 | 0.000 | 0.000 | 0.000 | 0.000 |
| E25 | 0.000 | 0.000 | 0.000 | 0.000 | 0.000 | 0.000 | 0.000 | 0.000 | 0.000 | 0.000 | 0.000 | 0.000 | 0.000 | 0.000 | 0.000 | 0.000 | 0.000 | 0.000 | 0.000 | 0.000 |
| E26 | 0.258 | 0.600 | 0.505 | 0.583 | 0.000 | 0.000 | 0.000 | 0.000 | 0.000 | 0.049 | 0.035 | 0.000 | 0.000 | 0.000 | 0.000 | 0.000 | 0.000 | 0.000 | 0.000 | 0.528 |
| E27 | 0.000 | 0.000 | 0.000 | 0.000 | 0.374 | 0.374 | 0.422 | 0.440 | 0.394 | 0.129 | 0.141 | 0.000 | 0.505 | 0.000 | 0.000 | 0.000 | 0.000 | 0.000 | 0.000 | 0.000 |
| E28 | 0.000 | 0.000 | 0.000 | 0.000 | 0.000 | 0.000 | 0.000 | 0.000 | 0.000 | 0.129 | 0.000 | 0.000 | 0.000 | 0.000 | 0.000 | 0.000 | 0.000 | 0.000 | 0.000 | 0.000 |
| E29 | 0.000 | 0.000 | 0.000 | 0.000 | 0.000 | 0.000 | 0.000 | 0.000 | 0.000 | 0.000 | 0.000 | 0.000 | 0.000 | 0.318 | 0.361 | 0.378 | 0.402 | 0.379 | 0.000 | 0.000 |
| E30 | 0.000 | 0.000 | 0.000 | 0.000 | 0.000 | 0.000 | 0.000 | 0.000 | 0.000 | 0.000 | 0.000 | 0.000 | 0.000 | 0.000 | 0.000 | 0.000 | 0.000 | 0.000 | 0.528 | 0.000 |
| E31 | 0.000 | 0.000 | 0.113 | 0.067 | 0.000 | 0.000 | 0.000 | 0.000 | 0.000 | 0.000 | 0.000 | 0.000 | 0.044 | 0.045 | 0.042 | 0.040 | 0.041 | 0.049 | 0.000 | 0.000 |
| E32 | 0.105 | 0.200 | 0.044 | 0.067 | 0.092 | 0.038 | 0.038 | 0.049 | 0.094 | 0.129 | 0.307 | 0.081 | 0.113 | 0.045 | 0.042 | 0.040 | 0.041 | 0.049 | 0.210 | 0.210 |
| E33 | 0.000 | 0.000 | 0.000 | 0.000 | 0.038 | 0.092 | 0.093 | 0.123 | 0.037 | 0.000 | 0.000 | 0.081 | 0.000 | 0.045 | 0.042 | 0.040 | 0.041 | 0.049 | 0.000 | 0.000 |
| E34 | 0.000 | 0.000 | 0.000 | 0.000 | 0.000 | 0.000 | 0.000 | 0.000 | 0.000 | 0.049 | 0.000 | 0.000 | 0.000 | 0.045 | 0.042 | 0.040 | 0.041 | 0.049 | 0.000 | 0.000 |

Table S15. Case 5. Weighted Supermatrix and Priorities, according to procedure 1 (continued).

|     | E21   | E22   | E23   | E24   | E25   | E26   | E27   | E28   | E29   | E30   | E31   | E32   | E33   | E34   | Priorities |
|-----|-------|-------|-------|-------|-------|-------|-------|-------|-------|-------|-------|-------|-------|-------|------------|
| E1  | 0.000 | 0.100 | 0.000 | 0.030 | 0.031 | 0.000 | 0.000 | 0.000 | 0.000 | 0.000 | 0.000 | 0.030 | 0.000 | 0.044 | 0.012205   |
| E2  | 0.000 | 0.021 | 0.195 | 0.000 | 0.031 | 0.035 | 0.000 | 0.000 | 0.000 | 0.000 | 0.000 | 0.030 | 0.000 | 0.044 | 0.028      |
| E3  | 0.000 | 0.000 | 0.000 | 0.000 | 0.031 | 0.035 | 0.000 | 0.000 | 0.000 | 0.000 | 0.090 | 0.000 | 0.000 | 0.000 | 0.006      |
| E4  | 0.000 | 0.000 | 0.000 | 0.168 | 0.031 | 0.000 | 0.000 | 0.000 | 0.000 | 0.000 | 0.033 | 0.030 | 0.000 | 0.044 | 0.016      |
| E5  | 0.000 | 0.000 | 0.195 | 0.000 | 0.031 | 0.000 | 0.074 | 0.000 | 0.000 | 0.000 | 0.000 | 0.000 | 0.000 | 0.000 | 0.030      |
| E6  | 0.000 | 0.202 | 0.000 | 0.000 | 0.031 | 0.000 | 0.000 | 0.000 | 0.000 | 0.000 | 0.000 | 0.000 | 0.040 | 0.000 | 0.020      |
| E7  | 0.000 | 0.000 | 0.000 | 0.000 | 0.031 | 0.000 | 0.000 | 0.000 | 0.000 | 0.000 | 0.000 | 0.000 | 0.040 | 0.000 | 0.010      |
| E8  | 0.000 | 0.000 | 0.000 | 0.000 | 0.031 | 0.000 | 0.032 | 0.000 | 0.000 | 0.000 | 0.090 | 0.000 | 0.000 | 0.000 | 0.013      |
| E9  | 0.000 | 0.000 | 0.000 | 0.000 | 0.031 | 0.000 | 0.000 | 0.000 | 0.000 | 0.000 | 0.000 | 0.088 | 0.000 | 0.000 | 0.012      |
| E10 | 0.000 | 0.000 | 0.000 | 0.000 | 0.031 | 0.035 | 0.032 | 0.297 | 0.000 | 0.000 | 0.090 | 0.030 | 0.040 | 0.044 | 0.038      |
| E11 | 0.000 | 0.100 | 0.092 | 0.000 | 0.031 | 0.162 | 0.074 | 0.000 | 0.000 | 0.000 | 0.000 | 0.088 | 0.109 | 0.044 | 0.060      |
| E12 | 0.000 | 0.021 | 0.000 | 0.000 | 0.031 | 0.000 | 0.000 | 0.000 | 0.000 | 0.000 | 0.000 | 0.000 | 0.000 | 0.000 | 0.004      |
| E13 | 0.000 | 0.000 | 0.000 | 0.000 | 0.031 | 0.000 | 0.000 | 0.000 | 0.000 | 0.000 | 0.000 | 0.000 | 0.000 | 0.000 | 0.004      |
| E14 | 0.000 | 0.000 | 0.000 | 0.000 | 0.031 | 0.000 | 0.000 | 0.000 | 0.000 | 0.000 | 0.000 | 0.030 | 0.000 | 0.000 | 0.007      |
| E15 | 0.000 | 0.050 | 0.000 | 0.074 | 0.031 | 0.000 | 0.000 | 0.000 | 0.221 | 0.000 | 0.000 | 0.030 | 0.000 | 0.000 | 0.032      |
| E16 | 0.000 | 0.021 | 0.000 | 0.030 | 0.031 | 0.000 | 0.000 | 0.000 | 0.022 | 0.000 | 0.000 | 0.030 | 0.000 | 0.000 | 0.014      |
| E17 | 0.000 | 0.100 | 0.000 | 0.074 | 0.031 | 0.000 | 0.000 | 0.000 | 0.054 | 0.000 | 0.000 | 0.030 | 0.000 | 0.000 | 0.026      |
| E18 | 0.000 | 0.000 | 0.399 | 0.030 | 0.031 | 0.000 | 0.000 | 0.000 | 0.022 | 0.000 | 0.000 | 0.030 | 0.000 | 0.000 | 0.047      |
| E19 | 0.095 | 0.000 | 0.000 | 0.000 | 0.000 | 0.000 | 0.000 | 0.000 | 0.000 | 0.200 | 0.000 | 0.030 | 0.000 | 0.000 | 0.008      |
| E20 | 0.095 | 0.000 | 0.000 | 0.000 | 0.000 | 0.306 | 0.000 | 0.000 | 0.000 | 0.000 | 0.000 | 0.030 | 0.000 | 0.000 | 0.018      |
| E21 | 0.000 | 0.000 | 0.000 | 0.000 | 0.000 | 0.000 | 0.000 | 0.000 | 0.000 | 0.200 | 0.000 | 0.030 | 0.000 | 0.000 | 0.006      |
| E22 | 0.000 | 0.000 | 0.000 | 0.168 | 0.031 | 0.000 | 0.000 | 0.000 | 0.221 | 0.000 | 0.090 | 0.030 | 0.109 | 0.122 | 0.063      |
| E23 | 0.000 | 0.100 | 0.000 | 0.000 | 0.031 | 0.306 | 0.301 | 0.297 | 0.221 | 0.000 | 0.090 | 0.030 | 0.109 | 0.122 | 0.101      |
| E24 | 0.000 | 0.000 | 0.000 | 0.000 | 0.031 | 0.000 | 0.000 | 0.000 | 0.022 | 0.000 | 0.000 | 0.030 | 0.000 | 0.000 | 0.010      |
| E25 | 0.000 | 0.000 | 0.000 | 0.000 | 0.000 | 0.000 | 0.301 | 0.297 | 0.000 | 0.000 | 0.392 | 0.248 | 0.405 | 0.415 | 0.067      |
| E26 | 0.000 | 0.000 | 0.000 | 0.000 | 0.000 | 0.000 | 0.000 | 0.000 | 0.000 | 0.000 | 0.090 | 0.000 | 0.000 | 0.000 | 0.048      |
| E27 | 0.000 | 0.000 | 0.000 | 0.000 | 0.000 | 0.000 | 0.000 | 0.000 | 0.000 | 0.000 | 0.000 | 0.000 | 0.109 | 0.000 | 0.052      |
| E28 | 0.000 | 0.000 | 0.000 | 0.000 | 0.219 | 0.000 | 0.000 | 0.000 | 0.000 | 0.000 | 0.000 | 0.030 | 0.000 | 0.000 | 0.022      |
| E29 | 0.000 | 0.202 | 0.040 | 0.321 | 0.000 | 0.000 | 0.000 | 0.000 | 0.000 | 0.000 | 0.033 | 0.088 | 0.040 | 0.122 | 0.077      |
| E30 | 0.560 | 0.000 | 0.000 | 0.000 | 0.000 | 0.000 | 0.000 | 0.000 | 0.000 | 0.000 | 0.000 | 0.000 | 0.000 | 0.000 | 0.008      |
| E31 | 0.000 | 0.021 | 0.040 | 0.074 | 0.031 | 0.084 | 0.000 | 0.037 | 0.054 | 0.000 | 0.000 | 0.000 | 0.000 | 0.000 | 0.025      |
| E32 | 0.249 | 0.021 | 0.040 | 0.000 | 0.031 | 0.035 | 0.032 | 0.071 | 0.054 | 0.600 | 0.000 | 0.000 | 0.000 | 0.000 | 0.072      |
| E33 | 0.000 | 0.021 | 0.000 | 0.000 | 0.031 | 0.000 | 0.155 | 0.000 | 0.054 | 0.000 | 0.000 | 0.000 | 0.000 | 0.000 | 0.028      |
| E34 | 0.000 | 0.021 | 0.000 | 0.030 | 0.031 | 0.000 | 0.000 | 0.000 | 0.054 | 0.000 | 0.000 | 0.000 | 0.000 | 0.000 | 0.015      |

Table S16. Case 5. Weighted Supermatrix and Priorities, according to procedure 2.

|     | E1    | E2    | E3    | E4    | E5    | E6    | E7    | E8    | E9    | E10   | E11   | E12   | E13   | E14   | E15   | E16   | E17   | E18   | E19   | E20   |
|-----|-------|-------|-------|-------|-------|-------|-------|-------|-------|-------|-------|-------|-------|-------|-------|-------|-------|-------|-------|-------|
| E1  | 0.019 | 0.018 | 0.081 | 0.019 | 0.014 | 0.014 | 0.015 | 0.016 | 0.014 | 0.017 | 0.014 | 0.015 | 0.016 | 0.014 | 0.014 | 0.014 | 0.015 | 0.015 | 0.018 | 0.018 |
| E2  | 0.019 | 0.018 | 0.081 | 0.019 | 0.014 | 0.014 | 0.015 | 0.016 | 0.014 | 0.017 | 0.014 | 0.015 | 0.016 | 0.014 | 0.014 | 0.014 | 0.015 | 0.015 | 0.018 | 0.018 |
| E3  | 0.019 | 0.018 | 0.016 | 0.019 | 0.014 | 0.014 | 0.015 | 0.016 | 0.014 | 0.017 | 0.014 | 0.015 | 0.016 | 0.014 | 0.014 | 0.014 | 0.015 | 0.015 | 0.018 | 0.018 |
| E4  | 0.186 | 0.018 | 0.081 | 0.019 | 0.014 | 0.014 | 0.015 | 0.016 | 0.014 | 0.017 | 0.014 | 0.015 | 0.016 | 0.014 | 0.014 | 0.014 | 0.015 | 0.015 | 0.018 | 0.018 |
| E5  | 0.019 | 0.018 | 0.016 | 0.019 | 0.014 | 0.040 | 0.015 | 0.127 | 0.040 | 0.017 | 0.014 | 0.015 | 0.016 | 0.014 | 0.014 | 0.014 | 0.015 | 0.015 | 0.018 | 0.018 |
| E6  | 0.019 | 0.018 | 0.016 | 0.019 | 0.040 | 0.014 | 0.075 | 0.045 | 0.073 | 0.017 | 0.014 | 0.015 | 0.016 | 0.014 | 0.014 | 0.014 | 0.015 | 0.015 | 0.018 | 0.018 |
| E7  | 0.019 | 0.018 | 0.016 | 0.019 | 0.040 | 0.114 | 0.015 | 0.045 | 0.073 | 0.017 | 0.014 | 0.015 | 0.016 | 0.014 | 0.014 | 0.014 | 0.015 | 0.015 | 0.018 | 0.018 |
| E8  | 0.019 | 0.018 | 0.016 | 0.019 | 0.114 | 0.040 | 0.041 | 0.016 | 0.040 | 0.017 | 0.014 | 0.015 | 0.016 | 0.014 | 0.014 | 0.014 | 0.015 | 0.015 | 0.018 | 0.018 |
| E9  | 0.019 | 0.018 | 0.016 | 0.019 | 0.040 | 0.040 | 0.075 | 0.045 | 0.014 | 0.017 | 0.014 | 0.015 | 0.016 | 0.014 | 0.014 | 0.014 | 0.015 | 0.015 | 0.018 | 0.018 |
| E10 | 0.019 | 0.018 | 0.016 | 0.019 | 0.014 | 0.014 | 0.015 | 0.016 | 0.014 | 0.017 | 0.150 | 0.160 | 0.081 | 0.014 | 0.014 | 0.014 | 0.015 | 0.015 | 0.018 | 0.018 |
| E11 | 0.019 | 0.018 | 0.016 | 0.019 | 0.014 | 0.014 | 0.015 | 0.016 | 0.014 | 0.185 | 0.014 | 0.073 | 0.081 | 0.014 | 0.014 | 0.014 | 0.015 | 0.015 | 0.018 | 0.018 |
| E12 | 0.019 | 0.018 | 0.016 | 0.019 | 0.014 | 0.014 | 0.015 | 0.016 | 0.014 | 0.017 | 0.014 | 0.015 | 0.081 | 0.014 | 0.014 | 0.014 | 0.015 | 0.015 | 0.018 | 0.018 |
| E13 | 0.019 | 0.018 | 0.016 | 0.019 | 0.014 | 0.014 | 0.015 | 0.016 | 0.014 | 0.017 | 0.039 | 0.041 | 0.016 | 0.014 | 0.014 | 0.014 | 0.015 | 0.015 | 0.018 | 0.018 |
| E14 | 0.019 | 0.018 | 0.016 | 0.019 | 0.014 | 0.014 | 0.015 | 0.016 | 0.014 | 0.017 | 0.014 | 0.015 | 0.016 | 0.014 | 0.014 | 0.014 | 0.015 | 0.042 | 0.018 | 0.018 |
| E15 | 0.019 | 0.018 | 0.016 | 0.019 | 0.014 | 0.014 | 0.015 | 0.016 | 0.014 | 0.017 | 0.014 | 0.015 | 0.016 | 0.041 | 0.014 | 0.076 | 0.077 | 0.042 | 0.018 | 0.018 |
| E16 | 0.019 | 0.018 | 0.016 | 0.019 | 0.014 | 0.014 | 0.015 | 0.016 | 0.014 | 0.017 | 0.014 | 0.015 | 0.016 | 0.041 | 0.040 | 0.014 | 0.077 | 0.042 | 0.018 | 0.018 |
| E17 | 0.019 | 0.018 | 0.016 | 0.019 | 0.014 | 0.014 | 0.015 | 0.016 | 0.014 | 0.017 | 0.014 | 0.015 | 0.016 | 0.041 | 0.117 | 0.076 | 0.015 | 0.042 | 0.018 | 0.018 |
| E18 | 0.019 | 0.018 | 0.016 | 0.019 | 0.014 | 0.014 | 0.015 | 0.016 | 0.014 | 0.017 | 0.014 | 0.015 | 0.016 | 0.041 | 0.014 | 0.014 | 0.015 | 0.015 | 0.018 | 0.018 |
| E19 | 0.019 | 0.018 | 0.016 | 0.019 | 0.014 | 0.014 | 0.015 | 0.016 | 0.014 | 0.017 | 0.014 | 0.015 | 0.016 | 0.014 | 0.014 | 0.014 | 0.015 | 0.015 | 0.018 | 0.124 |
| E20 | 0.019 | 0.018 | 0.016 | 0.019 | 0.014 | 0.014 | 0.015 | 0.016 | 0.014 | 0.017 | 0.014 | 0.015 | 0.016 | 0.014 | 0.014 | 0.014 | 0.015 | 0.015 | 0.050 | 0.018 |
| E21 | 0.019 | 0.018 | 0.016 | 0.019 | 0.014 | 0.014 | 0.015 | 0.016 | 0.014 | 0.017 | 0.014 | 0.015 | 0.016 | 0.014 | 0.014 | 0.014 | 0.015 | 0.015 | 0.124 | 0.050 |
| E22 | 0.019 | 0.126 | 0.016 | 0.019 | 0.014 | 0.114 | 0.119 | 0.016 | 0.118 | 0.017 | 0.014 | 0.160 | 0.016 | 0.166 | 0.117 | 0.120 | 0.122 | 0.015 | 0.018 | 0.018 |
| E23 | 0.019 | 0.018 | 0.016 | 0.138 | 0.114 | 0.014 | 0.015 | 0.016 | 0.014 | 0.017 | 0.103 | 0.015 | 0.016 | 0.014 | 0.014 | 0.014 | 0.015 | 0.127 | 0.018 | 0.018 |
| E24 | 0.019 | 0.018 | 0.016 | 0.019 | 0.014 | 0.014 | 0.015 | 0.016 | 0.014 | 0.017 | 0.039 | 0.015 | 0.016 | 0.014 | 0.040 | 0.040 | 0.015 | 0.015 | 0.018 | 0.018 |
| E25 | 0.019 | 0.018 | 0.016 | 0.019 | 0.014 | 0.014 | 0.015 | 0.016 | 0.014 | 0.017 | 0.014 | 0.015 | 0.016 | 0.014 | 0.014 | 0.014 | 0.015 | 0.015 | 0.018 | 0.018 |
| E26 | 0.135 | 0.178 | 0.181 | 0.189 | 0.014 | 0.014 | 0.015 | 0.016 | 0.014 | 0.047 | 0.039 | 0.015 | 0.016 | 0.014 | 0.014 | 0.014 | 0.015 | 0.015 | 0.018 | 0.176 |
| E27 | 0.019 | 0.018 | 0.016 | 0.019 | 0.166 | 0.166 | 0.171 | 0.179 | 0.170 | 0.085 | 0.103 | 0.015 | 0.181 | 0.014 | 0.014 | 0.014 | 0.015 | 0.015 | 0.018 | 0.018 |
| E28 | 0.019 | 0.018 | 0.016 | 0.019 | 0.014 | 0.014 | 0.015 | 0.016 | 0.014 | 0.085 | 0.014 | 0.015 | 0.016 | 0.014 | 0.014 | 0.014 | 0.015 | 0.015 | 0.018 | 0.018 |
| E29 | 0.019 | 0.018 | 0.016 | 0.019 | 0.014 | 0.014 | 0.015 | 0.016 | 0.014 | 0.017 | 0.014 | 0.015 | 0.016 | 0.166 | 0.168 | 0.172 | 0.173 | 0.179 | 0.018 | 0.018 |
| E30 | 0.019 | 0.018 | 0.016 | 0.019 | 0.014 | 0.014 | 0.015 | 0.016 | 0.014 | 0.017 | 0.014 | 0.015 | 0.016 | 0.014 | 0.014 | 0.014 | 0.015 | 0.015 | 0.176 | 0.018 |
| E31 | 0.019 | 0.018 | 0.081 | 0.054 | 0.014 | 0.014 | 0.015 | 0.016 | 0.014 | 0.017 | 0.014 | 0.015 | 0.045 | 0.041 | 0.040 | 0.040 | 0.041 | 0.042 | 0.018 | 0.018 |
| E32 | 0.091 | 0.126 | 0.045 | 0.054 | 0.074 | 0.040 | 0.041 | 0.045 | 0.073 | 0.085 | 0.150 | 0.073 | 0.081 | 0.041 | 0.040 | 0.040 | 0.041 | 0.042 | 0.124 | 0.124 |
| E33 | 0.019 | 0.018 | 0.016 | 0.019 | 0.040 | 0.074 | 0.075 | 0.083 | 0.040 | 0.017 | 0.014 | 0.073 | 0.016 | 0.041 | 0.040 | 0.040 | 0.041 | 0.042 | 0.018 | 0.018 |
| E34 | 0.019 | 0.018 | 0.016 | 0.019 | 0.014 | 0.014 | 0.015 | 0.016 | 0.014 | 0.047 | 0.014 | 0.015 | 0.016 | 0.041 | 0.040 | 0.040 | 0.041 | 0.042 | 0.018 | 0.018 |

Table S16. Case 5. Weighted Supermatrix and Priorities, according to procedure 2 (continued).

|     | E21   | E22   | E23   | E24   | E25   | E26   | E27   | E28   | E29   | E30   | E31   | E32   | E33   | E34   | Priorities |
|-----|-------|-------|-------|-------|-------|-------|-------|-------|-------|-------|-------|-------|-------|-------|------------|
| E1  | 0.017 | 0.081 | 0.015 | 0.034 | 0.030 | 0.014 | 0.013 | 0.015 | 0.011 | 0.018 | 0.014 | 0.029 | 0.014 | 0.042 | 0.022      |
| E2  | 0.017 | 0.025 | 0.115 | 0.013 | 0.030 | 0.038 | 0.013 | 0.015 | 0.011 | 0.018 | 0.014 | 0.029 | 0.014 | 0.042 | 0.025      |
| E3  | 0.017 | 0.010 | 0.015 | 0.013 | 0.030 | 0.038 | 0.013 | 0.015 | 0.011 | 0.018 | 0.069 | 0.011 | 0.014 | 0.015 | 0.018      |
| E4  | 0.017 | 0.010 | 0.015 | 0.106 | 0.030 | 0.014 | 0.013 | 0.015 | 0.011 | 0.018 | 0.037 | 0.029 | 0.014 | 0.042 | 0.024      |
| E5  | 0.017 | 0.010 | 0.115 | 0.013 | 0.030 | 0.014 | 0.067 | 0.015 | 0.011 | 0.018 | 0.014 | 0.011 | 0.014 | 0.015 | 0.027      |
| E6  | 0.017 | 0.128 | 0.015 | 0.013 | 0.030 | 0.014 | 0.013 | 0.015 | 0.011 | 0.018 | 0.014 | 0.011 | 0.040 | 0.015 | 0.026      |
| E7  | 0.017 | 0.010 | 0.015 | 0.013 | 0.030 | 0.014 | 0.013 | 0.015 | 0.011 | 0.018 | 0.014 | 0.011 | 0.040 | 0.015 | 0.021      |
| E8  | 0.017 | 0.010 | 0.015 | 0.013 | 0.030 | 0.014 | 0.037 | 0.015 | 0.011 | 0.018 | 0.069 | 0.011 | 0.014 | 0.015 | 0.022      |
| E9  | 0.017 | 0.010 | 0.015 | 0.013 | 0.030 | 0.014 | 0.013 | 0.015 | 0.011 | 0.018 | 0.014 | 0.070 | 0.014 | 0.015 | 0.022      |
| E10 | 0.017 | 0.010 | 0.015 | 0.013 | 0.030 | 0.038 | 0.037 | 0.148 | 0.011 | 0.018 | 0.069 | 0.029 | 0.040 | 0.042 | 0.034      |
| E11 | 0.017 | 0.081 | 0.075 | 0.013 | 0.030 | 0.108 | 0.067 | 0.015 | 0.011 | 0.018 | 0.014 | 0.070 | 0.076 | 0.042 | 0.042      |
| E12 | 0.017 | 0.025 | 0.015 | 0.013 | 0.030 | 0.014 | 0.013 | 0.015 | 0.011 | 0.018 | 0.014 | 0.011 | 0.014 | 0.015 | 0.017      |
| E13 | 0.017 | 0.010 | 0.015 | 0.013 | 0.030 | 0.014 | 0.013 | 0.015 | 0.011 | 0.018 | 0.014 | 0.011 | 0.014 | 0.015 | 0.017      |
| E14 | 0.017 | 0.010 | 0.015 | 0.013 | 0.030 | 0.014 | 0.013 | 0.015 | 0.011 | 0.018 | 0.014 | 0.029 | 0.014 | 0.015 | 0.017      |
| E15 | 0.017 | 0.049 | 0.015 | 0.064 | 0.030 | 0.014 | 0.013 | 0.015 | 0.132 | 0.018 | 0.014 | 0.029 | 0.014 | 0.015 | 0.030      |
| E16 | 0.017 | 0.025 | 0.015 | 0.034 | 0.030 | 0.014 | 0.013 | 0.015 | 0.028 | 0.018 | 0.014 | 0.029 | 0.014 | 0.015 | 0.022      |
| E17 | 0.017 | 0.081 | 0.015 | 0.064 | 0.030 | 0.014 | 0.013 | 0.015 | 0.054 | 0.018 | 0.014 | 0.029 | 0.014 | 0.015 | 0.029      |
| E18 | 0.017 | 0.010 | 0.167 | 0.034 | 0.030 | 0.014 | 0.013 | 0.015 | 0.028 | 0.018 | 0.014 | 0.029 | 0.014 | 0.015 | 0.027      |
| E19 | 0.084 | 0.010 | 0.015 | 0.013 | 0.010 | 0.014 | 0.013 | 0.015 | 0.011 | 0.126 | 0.014 | 0.029 | 0.014 | 0.015 | 0.021      |
| E20 | 0.084 | 0.010 | 0.015 | 0.013 | 0.010 | 0.154 | 0.013 | 0.015 | 0.011 | 0.018 | 0.014 | 0.029 | 0.014 | 0.015 | 0.022      |
| E21 | 0.017 | 0.010 | 0.015 | 0.013 | 0.010 | 0.014 | 0.013 | 0.015 | 0.011 | 0.126 | 0.014 | 0.029 | 0.014 | 0.015 | 0.021      |
| E22 | 0.017 | 0.010 | 0.015 | 0.106 | 0.030 | 0.014 | 0.013 | 0.015 | 0.132 | 0.018 | 0.069 | 0.029 | 0.076 | 0.080 | 0.053      |
| E23 | 0.017 | 0.081 | 0.015 | 0.013 | 0.030 | 0.154 | 0.151 | 0.148 | 0.132 | 0.018 | 0.069 | 0.029 | 0.076 | 0.080 | 0.058      |
| E24 | 0.017 | 0.010 | 0.015 | 0.013 | 0.030 | 0.014 | 0.013 | 0.015 | 0.028 | 0.018 | 0.014 | 0.029 | 0.014 | 0.015 | 0.020      |
| E25 | 0.017 | 0.010 | 0.015 | 0.013 | 0.010 | 0.014 | 0.151 | 0.148 | 0.011 | 0.018 | 0.170 | 0.170 | 0.176 | 0.180 | 0.046      |
| E26 | 0.017 | 0.010 | 0.015 | 0.013 | 0.010 | 0.014 | 0.013 | 0.015 | 0.011 | 0.018 | 0.069 | 0.011 | 0.014 | 0.015 | 0.035      |
| E27 | 0.017 | 0.010 | 0.015 | 0.013 | 0.010 | 0.014 | 0.013 | 0.015 | 0.011 | 0.018 | 0.014 | 0.011 | 0.076 | 0.015 | 0.043      |
| E28 | 0.017 | 0.010 | 0.015 | 0.013 | 0.178 | 0.014 | 0.013 | 0.015 | 0.011 | 0.018 | 0.014 | 0.029 | 0.014 | 0.015 | 0.025      |
| E29 | 0.017 | 0.128 | 0.042 | 0.158 | 0.010 | 0.014 | 0.013 | 0.015 | 0.011 | 0.018 | 0.037 | 0.070 | 0.040 | 0.080 | 0.051      |
| E30 | 0.180 | 0.010 | 0.015 | 0.013 | 0.010 | 0.014 | 0.013 | 0.015 | 0.011 | 0.018 | 0.014 | 0.011 | 0.014 | 0.015 | 0.021      |
| E31 | 0.017 | 0.025 | 0.042 | 0.064 | 0.030 | 0.071 | 0.013 | 0.042 | 0.054 | 0.018 | 0.014 | 0.011 | 0.014 | 0.015 | 0.029      |
| E32 | 0.128 | 0.025 | 0.042 | 0.013 | 0.030 | 0.038 | 0.037 | 0.073 | 0.054 | 0.178 | 0.014 | 0.011 | 0.014 | 0.015 | 0.057      |
| E33 | 0.017 | 0.025 | 0.015 | 0.013 | 0.030 | 0.014 | 0.105 | 0.015 | 0.054 | 0.018 | 0.014 | 0.011 | 0.014 | 0.015 | 0.032      |
| E34 | 0.017 | 0.025 | 0.015 | 0.034 | 0.030 | 0.014 | 0.013 | 0.015 | 0.054 | 0.018 | 0.014 | 0.011 | 0.014 | 0.015 | 0.023      |

Table S17. Case 6. Original Weighted Supermatrix and Priorities.

|     | E1    | E2    | E3    | E4    | E5    | E6    | E7    | E8    | E9    | E10   | E11   | E12   | E13   | E14   |
|-----|-------|-------|-------|-------|-------|-------|-------|-------|-------|-------|-------|-------|-------|-------|
| E1  | 0.000 | 0.000 | 0.000 | 0.000 | 0.000 | 0.000 | 0.169 | 0.017 | 0.025 | 0.017 | 0.021 | 0.125 | 0.206 | 0.169 |
| E2  | 0.000 | 0.000 | 0.000 | 0.000 | 0.000 | 0.000 | 0.042 | 0.260 | 0.252 | 0.090 | 0.050 | 0.125 | 0.033 | 0.169 |
| E3  | 0.000 | 0.000 | 0.000 | 0.000 | 0.000 | 0.000 | 0.100 | 0.027 | 0.052 | 0.088 | 0.021 | 0.046 | 0.033 | 0.071 |
| E4  | 0.000 | 0.000 | 0.000 | 0.000 | 0.000 | 0.000 | 0.023 | 0.049 | 0.052 | 0.028 | 0.050 | 0.125 | 0.033 | 0.032 |
| E5  | 0.000 | 0.000 | 0.000 | 0.000 | 0.000 | 0.000 | 0.040 | 0.260 | 0.252 | 0.090 | 0.219 | 0.021 | 0.091 | 0.017 |
| E6  | 0.000 | 0.000 | 0.000 | 0.000 | 0.000 | 0.000 | 0.540 | 0.139 | 0.118 | 0.440 | 0.113 | 0.046 | 0.091 | 0.071 |
| E7  | 0.160 | 0.010 | 0.048 | 0.018 | 0.010 | 0.124 | 0.000 | 0.007 | 0.018 | 0.000 | 0.008 | 0.000 | 0.000 | 0.000 |
| E8  | 0.023 | 0.096 | 0.024 | 0.097 | 0.096 | 0.014 | 0.000 | 0.019 | 0.000 | 0.178 | 0.008 | 0.000 | 0.000 | 0.000 |
| E9  | 0.023 | 0.096 | 0.036 | 0.065 | 0.096 | 0.015 | 0.000 | 0.073 | 0.160 | 0.000 | 0.008 | 0.000 | 0.000 | 0.000 |
| E10 | 0.023 | 0.028 | 0.120 | 0.049 | 0.028 | 0.076 | 0.000 | 0.079 | 0.000 | 0.000 | 0.008 | 0.000 | 0.000 | 0.000 |
| E11 | 0.003 | 0.005 | 0.006 | 0.007 | 0.027 | 0.011 | 0.011 | 0.035 | 0.009 | 0.053 | 0.019 | 0.000 | 0.000 | 0.000 |
| E12 | 0.017 | 0.024 | 0.021 | 0.035 | 0.002 | 0.005 | 0.000 | 0.000 | 0.000 | 0.000 | 0.000 | 0.076 | 0.000 | 0.000 |
| E13 | 0.017 | 0.004 | 0.006 | 0.007 | 0.009 | 0.005 | 0.000 | 0.000 | 0.000 | 0.000 | 0.005 | 0.000 | 0.076 | 0.000 |
| E14 | 0.020 | 0.026 | 0.025 | 0.007 | 0.002 | 0.007 | 0.000 | 0.000 | 0.000 | 0.000 | 0.000 | 0.000 | 0.000 | 0.000 |
| E15 | 0.005 | 0.004 | 0.005 | 0.007 | 0.022 | 0.034 | 0.075 | 0.035 | 0.062 | 0.018 | 0.049 | 0.000 | 0.000 | 0.000 |
| E16 | 0.110 | 0.074 | 0.077 | 0.016 | 0.155 | 0.021 | 0.000 | 0.000 | 0.000 | 0.000 | 0.000 | 0.172 | 0.063 | 0.000 |
| E17 | 0.031 | 0.035 | 0.026 | 0.042 | 0.022 | 0.108 | 0.000 | 0.000 | 0.000 | 0.000 | 0.006 | 0.013 | 0.008 | 0.018 |
| E18 | 0.068 | 0.097 | 0.053 | 0.052 | 0.025 | 0.027 | 0.000 | 0.000 | 0.000 | 0.000 | 0.000 | 0.000 | 0.000 | 0.000 |
| E19 | 0.031 | 0.025 | 0.049 | 0.103 | 0.025 | 0.021 | 0.000 | 0.000 | 0.000 | 0.000 | 0.062 | 0.000 | 0.063 | 0.000 |
| E20 | 0.006 | 0.006 | 0.006 | 0.006 | 0.006 | 0.006 | 0.000 | 0.000 | 0.000 | 0.000 | 0.028 | 0.000 | 0.000 | 0.000 |
| E21 | 0.031 | 0.085 | 0.031 | 0.103 | 0.056 | 0.113 | 0.000 | 0.000 | 0.000 | 0.000 | 0.077 | 0.037 | 0.000 | 0.127 |
| E22 | 0.030 | 0.025 | 0.076 | 0.103 | 0.120 | 0.053 | 0.000 | 0.000 | 0.000 | 0.000 | 0.036 | 0.000 | 0.060 | 0.000 |
| E23 | 0.132 | 0.091 | 0.120 | 0.015 | 0.030 | 0.090 | 0.000 | 0.000 | 0.000 | 0.000 | 0.036 | 0.031 | 0.060 | 0.127 |
| E24 | 0.026 | 0.014 | 0.027 | 0.032 | 0.031 | 0.024 | 0.000 | 0.000 | 0.000 | 0.000 | 0.104 | 0.028 | 0.023 | 0.011 |
| E25 | 0.026 | 0.014 | 0.081 | 0.097 | 0.182 | 0.111 | 0.000 | 0.000 | 0.000 | 0.000 | 0.009 | 0.065 | 0.121 | 0.047 |
| E26 | 0.067 | 0.081 | 0.081 | 0.029 | 0.028 | 0.123 | 0.000 | 0.000 | 0.000 | 0.000 | 0.047 | 0.078 | 0.032 | 0.132 |
| E27 | 0.151 | 0.160 | 0.081 | 0.111 | 0.028 | 0.011 | 0.000 | 0.000 | 0.000 | 0.000 | 0.018 | 0.013 | 0.008 | 0.010 |

Table S17. Case 6. Original Weighted Supermatrix and Priorities (continued).

|     | E15   | E16   | E17   | E18   | E19   | E20   | E21   | E22   | E23   | E24   | E25   | E26   | E27   | Priorities |
|-----|-------|-------|-------|-------|-------|-------|-------|-------|-------|-------|-------|-------|-------|------------|
| E1  | 0.058 | 0.084 | 0.028 | 0.085 | 0.074 | 0.096 | 0.028 | 0.028 | 0.066 | 0.027 | 0.035 | 0.052 | 0.143 | 0.052      |
| E2  | 0.058 | 0.192 | 0.124 | 0.326 | 0.074 | 0.096 | 0.157 | 0.067 | 0.153 | 0.274 | 0.042 | 0.129 | 0.302 | 0.116      |
| E3  | 0.058 | 0.084 | 0.028 | 0.085 | 0.074 | 0.096 | 0.028 | 0.067 | 0.153 | 0.056 | 0.086 | 0.052 | 0.059 | 0.051      |
| E4  | 0.058 | 0.014 | 0.124 | 0.174 | 0.222 | 0.096 | 0.157 | 0.182 | 0.017 | 0.056 | 0.072 | 0.022 | 0.059 | 0.058      |
| E5  | 0.292 | 0.192 | 0.028 | 0.043 | 0.074 | 0.096 | 0.065 | 0.182 | 0.032 | 0.274 | 0.207 | 0.052 | 0.057 | 0.098      |
| E6  | 0.292 | 0.025 | 0.261 | 0.015 | 0.074 | 0.096 | 0.157 | 0.067 | 0.153 | 0.127 | 0.207 | 0.258 | 0.017 | 0.126      |
| E7  | 0.003 | 0.000 | 0.000 | 0.000 | 0.000 | 0.000 | 0.000 | 0.000 | 0.000 | 0.000 | 0.000 | 0.000 | 0.000 | 0.020      |
| E8  | 0.003 | 0.000 | 0.000 | 0.000 | 0.000 | 0.000 | 0.000 | 0.000 | 0.000 | 0.000 | 0.000 | 0.000 | 0.004 | 0.024      |
| E9  | 0.036 | 0.000 | 0.000 | 0.000 | 0.000 | 0.000 | 0.000 | 0.000 | 0.026 | 0.000 | 0.000 | 0.000 | 0.032 | 0.027      |
| E10 | 0.014 | 0.000 | 0.000 | 0.000 | 0.000 | 0.030 | 0.000 | 0.000 | 0.004 | 0.000 | 0.000 | 0.000 | 0.000 | 0.019      |
| E11 | 0.037 | 0.023 | 0.167 | 0.000 | 0.119 | 0.140 | 0.122 | 0.105 | 0.140 | 0.000 | 0.000 | 0.024 | 0.000 | 0.026      |
| E12 | 0.000 | 0.000 | 0.000 | 0.000 | 0.012 | 0.000 | 0.010 | 0.011 | 0.000 | 0.000 | 0.056 | 0.000 | 0.000 | 0.009      |
| E13 | 0.007 | 0.163 | 0.000 | 0.000 | 0.044 | 0.020 | 0.030 | 0.059 | 0.020 | 0.000 | 0.056 | 0.122 | 0.000 | 0.022      |
| E14 | 0.000 | 0.000 | 0.019 | 0.000 | 0.012 | 0.020 | 0.024 | 0.011 | 0.020 | 0.000 | 0.056 | 0.000 | 0.000 | 0.009      |
| E15 | 0.083 | 0.000 | 0.000 | 0.000 | 0.000 | 0.000 | 0.000 | 0.000 | 0.000 | 0.000 | 0.000 | 0.000 | 0.000 | 0.012      |
| E16 | 0.000 | 0.000 | 0.000 | 0.000 | 0.000 | 0.000 | 0.000 | 0.000 | 0.000 | 0.000 | 0.000 | 0.029 | 0.000 | 0.028      |
| E17 | 0.000 | 0.000 | 0.002 | 0.000 | 0.029 | 0.000 | 0.000 | 0.000 | 0.059 | 0.000 | 0.000 | 0.009 | 0.000 | 0.020      |
| E18 | 0.000 | 0.000 | 0.000 | 0.083 | 0.000 | 0.000 | 0.000 | 0.000 | 0.000 | 0.000 | 0.000 | 0.000 | 0.145 | 0.024      |
| E19 | 0.000 | 0.034 | 0.042 | 0.000 | 0.004 | 0.000 | 0.000 | 0.000 | 0.000 | 0.000 | 0.000 | 0.003 | 0.000 | 0.017      |
| E20 | 0.000 | 0.000 | 0.000 | 0.000 | 0.000 | 0.065 | 0.000 | 0.000 | 0.000 | 0.000 | 0.000 | 0.004 | 0.000 | 0.003      |
| E21 | 0.000 | 0.000 | 0.011 | 0.000 | 0.025 | 0.000 | 0.067 | 0.000 | 0.000 | 0.145 | 0.000 | 0.029 | 0.000 | 0.036      |
| E22 | 0.000 | 0.034 | 0.000 | 0.000 | 0.009 | 0.000 | 0.000 | 0.067 | 0.000 | 0.028 | 0.000 | 0.027 | 0.000 | 0.028      |
| E23 | 0.000 | 0.000 | 0.011 | 0.000 | 0.000 | 0.000 | 0.000 | 0.000 | 0.007 | 0.012 | 0.000 | 0.028 | 0.000 | 0.031      |
| E24 | 0.000 | 0.000 | 0.000 | 0.000 | 0.000 | 0.000 | 0.000 | 0.017 | 0.110 | 0.000 | 0.000 | 0.071 | 0.000 | 0.019      |
| E25 | 0.000 | 0.019 | 0.136 | 0.000 | 0.155 | 0.019 | 0.019 | 0.017 | 0.012 | 0.000 | 0.046 | 0.017 | 0.000 | 0.043      |
| E26 | 0.000 | 0.136 | 0.019 | 0.190 | 0.000 | 0.132 | 0.136 | 0.121 | 0.028 | 0.000 | 0.138 | 0.066 | 0.000 | 0.055      |
| E27 | 0.000 | 0.000 | 0.000 | 0.000 | 0.000 | 0.000 | 0.000 | 0.000 | 0.000 | 0.000 | 0.000 | 0.006 | 0.182 | 0.034      |

Table S18. Case 6's X Influence Matrix.

[illegible]

Table S18. Case 6's X Influence Matrix (continued).

[illegible]



Table S19. Case 6. Weighted Supermatrix and Priorities, according to procedure 1.

|     | E1    | E2    | E3    | E4    | E5    | E6    | E7    | E8    | E9    | E10   | E11   | E12   | E13   | E14   |
|-----|-------|-------|-------|-------|-------|-------|-------|-------|-------|-------|-------|-------|-------|-------|
| E1  | 0.000 | 0.000 | 0.000 | 0.000 | 0.000 | 0.000 | 0.125 | 0.000 | 0.000 | 0.000 | 0.000 | 0.149 | 0.415 | 0.270 |
| E2  | 0.000 | 0.000 | 0.000 | 0.000 | 0.000 | 0.000 | 0.000 | 0.397 | 0.322 | 0.076 | 0.050 | 0.149 | 0.000 | 0.270 |
| E3  | 0.000 | 0.000 | 0.000 | 0.000 | 0.000 | 0.000 | 0.000 | 0.000 | 0.036 | 0.000 | 0.000 | 0.029 | 0.000 | 0.048 |
| E4  | 0.000 | 0.000 | 0.000 | 0.000 | 0.000 | 0.000 | 0.000 | 0.000 | 0.036 | 0.000 | 0.050 | 0.149 | 0.000 | 0.000 |
| E5  | 0.000 | 0.000 | 0.000 | 0.000 | 0.000 | 0.000 | 0.000 | 0.397 | 0.322 | 0.076 | 0.427 | 0.000 | 0.122 | 0.000 |
| E6  | 0.000 | 0.000 | 0.000 | 0.000 | 0.000 | 0.000 | 0.875 | 0.110 | 0.083 | 0.657 | 0.138 | 0.029 | 0.122 | 0.048 |
| E7  | 0.265 | 0.000 | 0.018 | 0.000 | 0.000 | 0.159 | 0.000 | 0.000 | 0.000 | 0.000 | 0.000 | 0.000 | 0.000 | 0.000 |
| E8  | 0.000 | 0.071 | 0.018 | 0.138 | 0.069 | 0.000 | 0.000 | 0.000 | 0.000 | 0.191 | 0.000 | 0.000 | 0.000 | 0.000 |
| E9  | 0.000 | 0.071 | 0.018 | 0.036 | 0.069 | 0.000 | 0.000 | 0.048 | 0.163 | 0.000 | 0.000 | 0.000 | 0.000 | 0.000 |
| E10 | 0.000 | 0.000 | 0.180 | 0.036 | 0.000 | 0.067 | 0.000 | 0.048 | 0.000 | 0.000 | 0.000 | 0.000 | 0.000 | 0.000 |
| E11 | 0.000 | 0.000 | 0.000 | 0.000 | 0.000 | 0.000 | 0.000 | 0.000 | 0.000 | 0.000 | 0.000 | 0.000 | 0.000 | 0.000 |
| E12 | 0.000 | 0.000 | 0.000 | 0.017 | 0.000 | 0.000 | 0.000 | 0.000 | 0.000 | 0.000 | 0.000 | 0.067 | 0.000 | 0.000 |
| E13 | 0.000 | 0.000 | 0.000 | 0.000 | 0.000 | 0.000 | 0.000 | 0.000 | 0.000 | 0.000 | 0.000 | 0.000 | 0.044 | 0.000 |
| E14 | 0.000 | 0.000 | 0.018 | 0.000 | 0.000 | 0.000 | 0.000 | 0.000 | 0.000 | 0.000 | 0.000 | 0.000 | 0.000 | 0.000 |
| E15 | 0.000 | 0.000 | 0.000 | 0.000 | 0.000 | 0.018 | 0.000 | 0.000 | 0.036 | 0.000 | 0.050 | 0.000 | 0.000 | 0.000 |
| E16 | 0.109 | 0.071 | 0.087 | 0.000 | 0.336 | 0.000 | 0.000 | 0.000 | 0.000 | 0.000 | 0.000 | 0.305 | 0.044 | 0.000 |
| E17 | 0.000 | 0.028 | 0.018 | 0.017 | 0.000 | 0.159 | 0.000 | 0.000 | 0.000 | 0.000 | 0.000 | 0.000 | 0.000 | 0.000 |
| E18 | 0.048 | 0.190 | 0.041 | 0.036 | 0.000 | 0.018 | 0.000 | 0.000 | 0.000 | 0.000 | 0.000 | 0.000 | 0.000 | 0.000 |
| E19 | 0.000 | 0.000 | 0.041 | 0.138 | 0.000 | 0.000 | 0.000 | 0.000 | 0.000 | 0.000 | 0.050 | 0.000 | 0.044 | 0.000 |
| E20 | 0.000 | 0.000 | 0.000 | 0.000 | 0.000 | 0.000 | 0.000 | 0.000 | 0.000 | 0.000 | 0.000 | 0.000 | 0.000 | 0.000 |
| E21 | 0.000 | 0.071 | 0.018 | 0.138 | 0.034 | 0.159 | 0.000 | 0.000 | 0.000 | 0.000 | 0.050 | 0.029 | 0.000 | 0.113 |
| E22 | 0.000 | 0.000 | 0.087 | 0.138 | 0.156 | 0.034 | 0.000 | 0.000 | 0.000 | 0.000 | 0.000 | 0.000 | 0.044 | 0.000 |
| E23 | 0.265 | 0.071 | 0.180 | 0.000 | 0.000 | 0.067 | 0.000 | 0.000 | 0.000 | 0.000 | 0.000 | 0.000 | 0.044 | 0.113 |
| E24 | 0.000 | 0.000 | 0.018 | 0.017 | 0.000 | 0.000 | 0.000 | 0.000 | 0.000 | 0.000 | 0.138 | 0.000 | 0.000 | 0.000 |
| E25 | 0.000 | 0.000 | 0.087 | 0.138 | 0.336 | 0.159 | 0.000 | 0.000 | 0.000 | 0.000 | 0.000 | 0.029 | 0.122 | 0.025 |
| E26 | 0.048 | 0.071 | 0.087 | 0.017 | 0.000 | 0.159 | 0.000 | 0.000 | 0.000 | 0.000 | 0.050 | 0.067 | 0.000 | 0.113 |
| E27 | 0.265 | 0.357 | 0.087 | 0.138 | 0.000 | 0.000 | 0.000 | 0.000 | 0.000 | 0.000 | 0.000 | 0.000 | 0.000 | 0.000 |

Table S19. Case 6. Weighted Supermatrix and Priorities, according to procedure 1 (continued).

[illegible]

Table S20. Case 6. Weighted Supermatrix and Priorities, according to procedure 2.

|     | E1    | E2    | E3    | E4    | E5    | E6    | E7    | E8    | E9    | E10   | E11   | E12   | E13   | E14   |
|-----|-------|-------|-------|-------|-------|-------|-------|-------|-------|-------|-------|-------|-------|-------|
| E1  | 0.015 | 0.014 | 0.009 | 0.009 | 0.016 | 0.010 | 0.079 | 0.019 | 0.016 | 0.023 | 0.017 | 0.111 | 0.212 | 0.155 |
| E2  | 0.015 | 0.014 | 0.009 | 0.009 | 0.016 | 0.010 | 0.027 | 0.195 | 0.178 | 0.065 | 0.048 | 0.111 | 0.016 | 0.155 |
| E3  | 0.015 | 0.014 | 0.009 | 0.009 | 0.016 | 0.010 | 0.027 | 0.019 | 0.043 | 0.023 | 0.017 | 0.034 | 0.016 | 0.059 |
| E4  | 0.015 | 0.014 | 0.009 | 0.009 | 0.016 | 0.010 | 0.027 | 0.019 | 0.043 | 0.023 | 0.048 | 0.111 | 0.016 | 0.013 |
| E5  | 0.015 | 0.014 | 0.009 | 0.009 | 0.016 | 0.010 | 0.027 | 0.195 | 0.178 | 0.065 | 0.217 | 0.013 | 0.090 | 0.013 |
| E6  | 0.015 | 0.014 | 0.009 | 0.009 | 0.016 | 0.010 | 0.252 | 0.094 | 0.079 | 0.236 | 0.096 | 0.034 | 0.090 | 0.059 |
| E7  | 0.153 | 0.014 | 0.021 | 0.009 | 0.016 | 0.116 | 0.027 | 0.019 | 0.016 | 0.023 | 0.017 | 0.013 | 0.016 | 0.013 |
| E8  | 0.015 | 0.067 | 0.021 | 0.110 | 0.076 | 0.010 | 0.027 | 0.019 | 0.016 | 0.116 | 0.017 | 0.013 | 0.016 | 0.013 |
| E9  | 0.015 | 0.067 | 0.021 | 0.042 | 0.076 | 0.010 | 0.027 | 0.052 | 0.122 | 0.023 | 0.017 | 0.013 | 0.016 | 0.013 |
| E10 | 0.015 | 0.014 | 0.137 | 0.042 | 0.016 | 0.072 | 0.027 | 0.052 | 0.016 | 0.023 | 0.017 | 0.013 | 0.016 | 0.013 |
| E11 | 0.015 | 0.014 | 0.009 | 0.009 | 0.016 | 0.010 | 0.027 | 0.019 | 0.016 | 0.023 | 0.017 | 0.013 | 0.016 | 0.013 |
| E12 | 0.015 | 0.014 | 0.009 | 0.022 | 0.016 | 0.010 | 0.027 | 0.019 | 0.016 | 0.023 | 0.017 | 0.066 | 0.016 | 0.013 |
| E13 | 0.015 | 0.014 | 0.009 | 0.009 | 0.016 | 0.010 | 0.027 | 0.019 | 0.016 | 0.023 | 0.017 | 0.013 | 0.045 | 0.013 |
| E14 | 0.015 | 0.014 | 0.021 | 0.009 | 0.016 | 0.010 | 0.027 | 0.019 | 0.016 | 0.023 | 0.017 | 0.013 | 0.016 | 0.013 |
| E15 | 0.015 | 0.014 | 0.009 | 0.009 | 0.016 | 0.026 | 0.027 | 0.019 | 0.043 | 0.023 | 0.048 | 0.013 | 0.016 | 0.013 |
| E16 | 0.102 | 0.067 | 0.078 | 0.009 | 0.175 | 0.010 | 0.027 | 0.019 | 0.016 | 0.023 | 0.017 | 0.175 | 0.045 | 0.013 |
| E17 | 0.015 | 0.036 | 0.021 | 0.022 | 0.016 | 0.116 | 0.027 | 0.019 | 0.016 | 0.023 | 0.017 | 0.013 | 0.016 | 0.013 |
| E18 | 0.066 | 0.122 | 0.044 | 0.042 | 0.016 | 0.026 | 0.027 | 0.019 | 0.016 | 0.023 | 0.017 | 0.013 | 0.016 | 0.013 |
| E19 | 0.015 | 0.014 | 0.044 | 0.110 | 0.016 | 0.010 | 0.027 | 0.019 | 0.016 | 0.023 | 0.048 | 0.013 | 0.045 | 0.013 |
| E20 | 0.015 | 0.014 | 0.009 | 0.009 | 0.016 | 0.010 | 0.027 | 0.019 | 0.016 | 0.023 | 0.017 | 0.013 | 0.016 | 0.013 |
| E21 | 0.015 | 0.067 | 0.021 | 0.110 | 0.043 | 0.116 | 0.027 | 0.019 | 0.016 | 0.023 | 0.048 | 0.034 | 0.016 | 0.097 |
| E22 | 0.015 | 0.014 | 0.078 | 0.110 | 0.119 | 0.046 | 0.027 | 0.019 | 0.016 | 0.023 | 0.017 | 0.013 | 0.045 | 0.013 |
| E23 | 0.153 | 0.067 | 0.137 | 0.009 | 0.016 | 0.072 | 0.027 | 0.019 | 0.016 | 0.023 | 0.017 | 0.013 | 0.045 | 0.097 |
| E24 | 0.015 | 0.014 | 0.021 | 0.022 | 0.016 | 0.010 | 0.027 | 0.019 | 0.016 | 0.023 | 0.096 | 0.013 | 0.016 | 0.013 |
| E25 | 0.015 | 0.014 | 0.078 | 0.110 | 0.175 | 0.116 | 0.027 | 0.019 | 0.016 | 0.023 | 0.017 | 0.034 | 0.090 | 0.034 |
| E26 | 0.066 | 0.067 | 0.078 | 0.022 | 0.016 | 0.116 | 0.027 | 0.019 | 0.016 | 0.023 | 0.048 | 0.066 | 0.016 | 0.097 |
| E27 | 0.153 | 0.186 | 0.078 | 0.110 | 0.016 | 0.010 | 0.027 | 0.019 | 0.016 | 0.023 | 0.017 | 0.013 | 0.016 | 0.013 |

Table S20. Case 6. Weighted Supermatrix and Priorities, according to procedure 2 (continued).

|     | E15   | E16   | E17   | E18   | E19   | E20   | E21   | E22   | E23   | E24   | E25   | E26   | E27   | Priorities |
|-----|-------|-------|-------|-------|-------|-------|-------|-------|-------|-------|-------|-------|-------|------------|
| E1  | 0.022 | 0.066 | 0.018 | 0.055 | 0.047 | 0.078 | 0.013 | 0.014 | 0.058 | 0.017 | 0.014 | 0.050 | 0.094 | 0.039      |
| E2  | 0.022 | 0.153 | 0.086 | 0.223 | 0.047 | 0.078 | 0.135 | 0.039 | 0.136 | 0.188 | 0.038 | 0.098 | 0.210 | 0.077      |
| E3  | 0.022 | 0.066 | 0.018 | 0.055 | 0.047 | 0.078 | 0.013 | 0.039 | 0.136 | 0.047 | 0.074 | 0.050 | 0.020 | 0.033      |
| E4  | 0.022 | 0.015 | 0.086 | 0.102 | 0.207 | 0.078 | 0.135 | 0.175 | 0.013 | 0.047 | 0.038 | 0.018 | 0.020 | 0.041      |
| E5  | 0.206 | 0.153 | 0.018 | 0.019 | 0.047 | 0.078 | 0.056 | 0.175 | 0.033 | 0.188 | 0.174 | 0.050 | 0.020 | 0.068      |
| E6  | 0.206 | 0.015 | 0.203 | 0.019 | 0.047 | 0.078 | 0.135 | 0.039 | 0.136 | 0.085 | 0.174 | 0.219 | 0.020 | 0.080      |
| E7  | 0.022 | 0.015 | 0.018 | 0.019 | 0.017 | 0.011 | 0.013 | 0.014 | 0.013 | 0.017 | 0.014 | 0.018 | 0.020 | 0.030      |
| E8  | 0.022 | 0.015 | 0.018 | 0.019 | 0.017 | 0.011 | 0.013 | 0.014 | 0.013 | 0.017 | 0.014 | 0.018 | 0.020 | 0.031      |
| E9  | 0.022 | 0.015 | 0.018 | 0.019 | 0.017 | 0.011 | 0.013 | 0.014 | 0.013 | 0.017 | 0.014 | 0.018 | 0.020 | 0.030      |
| E10 | 0.022 | 0.015 | 0.018 | 0.019 | 0.017 | 0.027 | 0.013 | 0.014 | 0.013 | 0.017 | 0.014 | 0.018 | 0.020 | 0.027      |
| E11 | 0.022 | 0.015 | 0.139 | 0.019 | 0.092 | 0.137 | 0.088 | 0.076 | 0.136 | 0.017 | 0.014 | 0.018 | 0.020 | 0.032      |
| E12 | 0.022 | 0.015 | 0.018 | 0.019 | 0.017 | 0.011 | 0.013 | 0.014 | 0.013 | 0.017 | 0.038 | 0.018 | 0.020 | 0.018      |
| E13 | 0.022 | 0.153 | 0.018 | 0.019 | 0.017 | 0.011 | 0.013 | 0.039 | 0.013 | 0.017 | 0.038 | 0.098 | 0.020 | 0.029      |
| E14 | 0.022 | 0.015 | 0.018 | 0.019 | 0.017 | 0.011 | 0.013 | 0.014 | 0.013 | 0.017 | 0.038 | 0.018 | 0.020 | 0.017      |
| E15 | 0.063 | 0.015 | 0.018 | 0.019 | 0.017 | 0.011 | 0.013 | 0.014 | 0.013 | 0.017 | 0.014 | 0.018 | 0.020 | 0.019      |
| E16 | 0.022 | 0.015 | 0.018 | 0.019 | 0.017 | 0.011 | 0.013 | 0.014 | 0.013 | 0.017 | 0.014 | 0.018 | 0.020 | 0.040      |
| E17 | 0.022 | 0.015 | 0.018 | 0.019 | 0.017 | 0.011 | 0.013 | 0.014 | 0.033 | 0.017 | 0.014 | 0.018 | 0.020 | 0.027      |
| E18 | 0.022 | 0.015 | 0.018 | 0.055 | 0.017 | 0.011 | 0.013 | 0.014 | 0.013 | 0.017 | 0.014 | 0.018 | 0.094 | 0.034      |
| E19 | 0.022 | 0.015 | 0.018 | 0.019 | 0.017 | 0.011 | 0.013 | 0.014 | 0.013 | 0.017 | 0.014 | 0.018 | 0.020 | 0.023      |
| E20 | 0.022 | 0.015 | 0.018 | 0.019 | 0.017 | 0.046 | 0.013 | 0.014 | 0.013 | 0.017 | 0.014 | 0.018 | 0.020 | 0.016      |
| E21 | 0.022 | 0.015 | 0.018 | 0.019 | 0.017 | 0.011 | 0.056 | 0.014 | 0.013 | 0.085 | 0.014 | 0.018 | 0.020 | 0.041      |
| E22 | 0.022 | 0.015 | 0.018 | 0.019 | 0.017 | 0.011 | 0.013 | 0.039 | 0.013 | 0.017 | 0.014 | 0.018 | 0.020 | 0.033      |
| E23 | 0.022 | 0.015 | 0.018 | 0.019 | 0.017 | 0.011 | 0.013 | 0.014 | 0.013 | 0.017 | 0.014 | 0.018 | 0.020 | 0.036      |
| E24 | 0.022 | 0.015 | 0.018 | 0.019 | 0.017 | 0.011 | 0.013 | 0.014 | 0.090 | 0.017 | 0.014 | 0.050 | 0.020 | 0.024      |
| E25 | 0.022 | 0.015 | 0.086 | 0.019 | 0.144 | 0.011 | 0.013 | 0.014 | 0.013 | 0.017 | 0.038 | 0.018 | 0.020 | 0.050      |
| E26 | 0.022 | 0.102 | 0.018 | 0.102 | 0.017 | 0.137 | 0.135 | 0.119 | 0.013 | 0.017 | 0.118 | 0.050 | 0.020 | 0.060      |
| E27 | 0.022 | 0.015 | 0.018 | 0.019 | 0.017 | 0.011 | 0.013 | 0.014 | 0.013 | 0.017 | 0.014 | 0.018 | 0.146 | 0.046      |

Table S21. Case 7. Original Weighted Supermatrix and Priorities.

|     | E1    | E2    | E3    | E4    | E5    | E6    | E7    | E8    | E9    | E10   | E11   | E12   | E13   | E14   | E15   | E16   | E17   | E18   | E19   | E20   |
|-----|-------|-------|-------|-------|-------|-------|-------|-------|-------|-------|-------|-------|-------|-------|-------|-------|-------|-------|-------|-------|
| E1  | 0.000 | 0.000 | 0.000 | 0.000 | 0.269 | 0.020 | 0.012 | 0.161 | 0.154 | 0.057 | 0.203 | 0.511 | 0.071 | 0.066 | 0.066 | 0.162 | 0.024 | 0.022 | 0.155 | 0.169 |
| E2  | 0.000 | 0.000 | 0.000 | 0.000 | 0.491 | 0.032 | 0.029 | 0.161 | 0.111 | 0.081 | 0.127 | 0.153 | 0.022 | 0.066 | 0.066 | 0.053 | 0.109 | 0.067 | 0.256 | 0.279 |
| E3  | 0.000 | 0.000 | 0.000 | 0.000 | 0.146 | 0.003 | 0.002 | 0.161 | 0.028 | 0.474 | 0.031 | 0.045 | 0.022 | 0.066 | 0.066 | 0.012 | 0.008 | 0.022 | 0.027 | 0.028 |
| E4  | 0.000 | 0.000 | 0.000 | 0.000 | 0.094 | 0.008 | 0.010 | 0.161 | 0.351 | 0.192 | 0.322 | 0.292 | 0.020 | 0.066 | 0.066 | 0.038 | 0.037 | 0.022 | 0.059 | 0.069 |
| E5  | 0.075 | 0.047 | 0.075 | 0.027 | 0.000 | 0.000 | 0.000 | 0.000 | 0.000 | 0.000 | 0.000 | 0.000 | 0.000 | 0.000 | 0.000 | 0.000 | 0.000 | 0.000 | 0.000 | 0.000 |
| E6  | 0.047 | 0.075 | 0.047 | 0.100 | 0.000 | 0.000 | 0.142 | 0.000 | 0.000 | 0.000 | 0.000 | 0.000 | 0.000 | 0.000 | 0.000 | 0.000 | 0.000 | 0.000 | 0.000 | 0.000 |
| E7  | 0.020 | 0.020 | 0.020 | 0.015 | 0.000 | 0.000 | 0.000 | 0.000 | 0.000 | 0.000 | 0.000 | 0.000 | 0.000 | 0.000 | 0.000 | 0.000 | 0.000 | 0.000 | 0.000 | 0.000 |
| E8  | 0.004 | 0.005 | 0.023 | 0.004 | 0.000 | 0.000 | 0.000 | 0.000 | 0.000 | 0.000 | 0.000 | 0.000 | 0.000 | 0.000 | 0.000 | 0.000 | 0.000 | 0.000 | 0.000 | 0.000 |
| E9  | 0.020 | 0.019 | 0.005 | 0.036 | 0.000 | 0.000 | 0.000 | 0.000 | 0.000 | 0.000 | 0.053 | 0.000 | 0.000 | 0.000 | 0.000 | 0.000 | 0.023 | 0.000 | 0.000 | 0.000 |
| E10 | 0.011 | 0.009 | 0.022 | 0.010 | 0.000 | 0.000 | 0.000 | 0.300 | 0.000 | 0.000 | 0.000 | 0.000 | 0.000 | 0.000 | 0.000 | 0.000 | 0.000 | 0.000 | 0.000 | 0.000 |
| E11 | 0.034 | 0.030 | 0.013 | 0.019 | 0.000 | 0.000 | 0.000 | 0.000 | 0.000 | 0.000 | 0.000 | 0.000 | 0.000 | 0.000 | 0.000 | 0.000 | 0.023 | 0.000 | 0.000 | 0.000 |
| E12 | 0.007 | 0.013 | 0.013 | 0.006 | 0.000 | 0.000 | 0.000 | 0.000 | 0.300 | 0.000 | 0.265 | 0.000 | 0.000 | 0.000 | 0.000 | 0.000 | 0.070 | 0.000 | 0.000 | 0.000 |
| E13 | 0.005 | 0.005 | 0.010 | 0.006 | 0.000 | 0.000 | 0.000 | 0.000 | 0.000 | 0.164 | 0.000 | 0.000 | 0.000 | 0.546 | 0.459 | 0.546 | 0.000 | 0.332 | 0.000 | 0.000 |
| E14 | 0.010 | 0.010 | 0.025 | 0.009 | 0.000 | 0.000 | 0.000 | 0.000 | 0.000 | 0.000 | 0.000 | 0.000 | 0.000 | 0.000 | 0.070 | 0.109 | 0.000 | 0.000 | 0.000 | 0.000 |
| E15 | 0.006 | 0.007 | 0.021 | 0.007 | 0.000 | 0.000 | 0.000 | 0.000 | 0.000 | 0.000 | 0.000 | 0.000 | 0.000 | 0.000 | 0.000 | 0.000 | 0.000 | 0.000 | 0.000 | 0.000 |
| E16 | 0.015 | 0.013 | 0.003 | 0.015 | 0.000 | 0.000 | 0.000 | 0.000 | 0.000 | 0.033 | 0.000 | 0.000 | 0.000 | 0.109 | 0.126 | 0.000 | 0.000 | 0.000 | 0.000 | 0.000 |
| E17 | 0.034 | 0.034 | 0.005 | 0.032 | 0.000 | 0.000 | 0.000 | 0.000 | 0.000 | 0.000 | 0.000 | 0.000 | 0.000 | 0.000 | 0.000 | 0.000 | 0.000 | 0.000 | 0.000 | 0.000 |
| E18 | 0.002 | 0.002 | 0.008 | 0.003 | 0.000 | 0.000 | 0.000 | 0.000 | 0.000 | 0.000 | 0.000 | 0.000 | 0.332 | 0.000 | 0.000 | 0.000 | 0.000 | 0.000 | 0.000 | 0.000 |
| E19 | 0.046 | 0.046 | 0.046 | 0.046 | 0.000 | 0.000 | 0.000 | 0.000 | 0.000 | 0.000 | 0.000 | 0.000 | 0.000 | 0.000 | 0.000 | 0.000 | 0.000 | 0.000 | 0.000 | 0.000 |
| E20 | 0.025 | 0.026 | 0.026 | 0.026 | 0.000 | 0.000 | 0.000 | 0.000 | 0.000 | 0.000 | 0.000 | 0.000 | 0.000 | 0.000 | 0.000 | 0.000 | 0.000 | 0.000 | 0.000 | 0.000 |
| E21 | 0.010 | 0.009 | 0.009 | 0.009 | 0.000 | 0.000 | 0.000 | 0.000 | 0.000 | 0.000 | 0.000 | 0.000 | 0.000 | 0.000 | 0.000 | 0.000 | 0.000 | 0.000 | 0.000 | 0.000 |
| E22 | 0.080 | 0.079 | 0.079 | 0.079 | 0.000 | 0.000 | 0.000 | 0.000 | 0.000 | 0.000 | 0.000 | 0.000 | 0.000 | 0.000 | 0.000 | 0.000 | 0.000 | 0.000 | 0.000 | 0.000 |
| E23 | 0.030 | 0.030 | 0.097 | 0.030 | 0.000 | 0.000 | 0.000 | 0.000 | 0.000 | 0.000 | 0.000 | 0.000 | 0.000 | 0.000 | 0.000 | 0.000 | 0.000 | 0.000 | 0.000 | 0.000 |
| E24 | 0.008 | 0.008 | 0.047 | 0.008 | 0.000 | 0.000 | 0.000 | 0.000 | 0.000 | 0.000 | 0.000 | 0.000 | 0.000 | 0.000 | 0.000 | 0.000 | 0.000 | 0.000 | 0.000 | 0.000 |
| E25 | 0.047 | 0.047 | 0.012 | 0.047 | 0.000 | 0.000 | 0.000 | 0.000 | 0.000 | 0.000 | 0.000 | 0.000 | 0.000 | 0.000 | 0.000 | 0.000 | 0.000 | 0.000 | 0.000 | 0.000 |
| E26 | 0.081 | 0.081 | 0.012 | 0.081 | 0.000 | 0.000 | 0.000 | 0.000 | 0.000 | 0.000 | 0.000 | 0.000 | 0.000 | 0.000 | 0.000 | 0.000 | 0.000 | 0.000 | 0.129 | 0.000 |
| E27 | 0.015 | 0.015 | 0.012 | 0.015 | 0.000 | 0.000 | 0.000 | 0.000 | 0.000 | 0.000 | 0.000 | 0.000 | 0.000 | 0.000 | 0.000 | 0.000 | 0.000 | 0.000 | 0.000 | 0.000 |
| E28 | 0.009 | 0.008 | 0.009 | 0.007 | 0.000 | 0.000 | 0.000 | 0.000 | 0.000 | 0.000 | 0.000 | 0.000 | 0.000 | 0.000 | 0.000 | 0.000 | 0.000 | 0.000 | 0.000 | 0.000 |
| E29 | 0.004 | 0.004 | 0.031 | 0.033 | 0.000 | 0.000 | 0.000 | 0.000 | 0.000 | 0.000 | 0.000 | 0.000 | 0.000 | 0.000 | 0.000 | 0.000 | 0.000 | 0.000 | 0.000 | 0.000 |
| E30 | 0.031 | 0.015 | 0.004 | 0.011 | 0.000 | 0.000 | 0.000 | 0.000 | 0.000 | 0.000 | 0.000 | 0.000 | 0.000 | 0.000 | 0.000 | 0.000 | 0.000 | 0.000 | 0.000 | 0.000 |
| E31 | 0.011 | 0.028 | 0.011 | 0.004 | 0.000 | 0.000 | 0.000 | 0.000 | 0.000 | 0.000 | 0.000 | 0.000 | 0.000 | 0.000 | 0.000 | 0.000 | 0.000 | 0.000 | 0.000 | 0.000 |
| E32 | 0.021 | 0.023 | 0.057 | 0.020 | 0.000 | 0.000 | 0.000 | 0.000 | 0.000 | 0.000 | 0.000 | 0.000 | 0.000 | 0.000 | 0.000 | 0.000 | 0.000 | 0.000 | 0.030 | 0.032 |
| E33 | 0.013 | 0.012 | 0.036 | 0.011 | 0.000 | 0.000 | 0.000 | 0.000 | 0.000 | 0.000 | 0.000 | 0.000 | 0.000 | 0.000 | 0.000 | 0.000 | 0.000 | 0.000 | 0.073 | 0.080 |
| E34 | 0.067 | 0.066 | 0.009 | 0.071 | 0.000 | 0.000 | 0.000 | 0.000 | 0.000 | 0.000 | 0.000 | 0.000 | 0.000 | 0.000 | 0.000 | 0.000 | 0.000 | 0.000 | 0.180 | 0.197 |
| E35 | 0.002 | 0.002 | 0.002 | 0.002 | 0.000 | 0.000 | 0.000 | 0.000 | 0.000 | 0.000 | 0.000 | 0.000 | 0.000 | 0.000 | 0.000 | 0.000 | 0.000 | 0.000 | 0.000 | 0.000 |
| E36 | 0.001 | 0.001 | 0.001 | 0.001 | 0.000 | 0.000 | 0.000 | 0.000 | 0.000 | 0.000 | 0.000 | 0.000 | 0.000 | 0.000 | 0.000 | 0.000 | 0.000 | 0.000 | 0.000 | 0.037 |
| E37 | 0.003 | 0.003 | 0.003 | 0.004 | 0.000 | 0.000 | 0.000 | 0.000 | 0.000 | 0.000 | 0.000 | 0.000 | 0.000 | 0.000 | 0.000 | 0.000 | 0.000 | 0.000 | 0.000 | 0.007 |
| E38 | 0.009 | 0.009 | 0.009 | 0.009 | 0.000 | 0.000 | 0.000 | 0.000 | 0.000 | 0.000 | 0.000 | 0.000 | 0.000 | 0.000 | 0.000 | 0.000 | 0.000 | 0.000 | 0.000 | 0.000 |
| E39 | 0.005 | 0.005 | 0.012 | 0.005 | 0.000 | 0.000 | 0.000 | 0.000 | 0.000 | 0.000 | 0.000 | 0.000 | 0.000 | 0.000 | 0.000 | 0.000 | 0.040 | 0.033 | 0.000 | 0.000 |
| E40 | 0.009 | 0.008 | 0.009 | 0.009 | 0.000 | 0.000 | 0.000 | 0.000 | 0.000 | 0.000 | 0.000 | 0.000 | 0.043 | 0.000 | 0.000 | 0.000 | 0.169 | 0.041 | 0.000 | 0.000 |
| E41 | 0.004 | 0.005 | 0.016 | 0.005 | 0.000 | 0.000 | 0.000 | 0.000 | 0.000 | 0.000 | 0.000 | 0.000 | 0.000 | 0.000 | 0.000 | 0.000 | 0.000 | 0.014 | 0.091 | 0.100 |
| E42 | 0.026 | 0.025 | 0.023 | 0.025 | 0.000 | 0.000 | 0.000 | 0.000 | 0.000 | 0.000 | 0.000 | 0.000 | 0.103 | 0.000 | 0.000 | 0.000 | 0.381 | 0.113 | 0.000 | 0.000 |

[illegible][illegible]

|     | E21   | E22   | E23   | E24   | E25   | E26   | E27   | E28   | E29   | E30   | E31   | E32   | E33   | E34   | E35   | E36   | E37   | E38   | E39   | E40   |
|-----|-------|-------|-------|-------|-------|-------|-------|-------|-------|-------|-------|-------|-------|-------|-------|-------|-------|-------|-------|-------|
| E29 | 0.000 | 0.000 | 0.000 | 0.000 | 0.000 | 0.000 | 0.000 | 0.000 | 0.000 | 0.012 | 0.000 | 0.000 | 0.000 | 0.000 | 0.000 | 0.000 | 0.000 | 0.000 | 0.000 | 0.000 |
| E30 | 0.000 | 0.000 | 0.000 | 0.000 | 0.000 | 0.000 | 0.000 | 0.070 | 0.053 | 0.000 | 0.000 | 0.000 | 0.000 | 0.000 | 0.000 | 0.000 | 0.000 | 0.000 | 0.000 | 0.000 |
| E31 | 0.000 | 0.000 | 0.000 | 0.000 | 0.000 | 0.000 | 0.000 | 0.000 | 0.000 | 0.003 | 0.000 | 0.000 | 0.000 | 0.000 | 0.000 | 0.000 | 0.000 | 0.000 | 0.000 | 0.000 |
| E32 | 0.034 | 0.065 | 0.000 | 0.000 | 0.000 | 0.000 | 0.000 | 0.000 | 0.000 | 0.000 | 0.000 | 0.000 | 0.000 | 0.000 | 0.068 | 0.000 | 0.000 | 0.000 | 0.000 | 0.000 |
| E33 | 0.084 | 0.026 | 0.000 | 0.000 | 0.000 | 0.000 | 0.000 | 0.000 | 0.000 | 0.000 | 0.000 | 0.000 | 0.000 | 0.000 | 0.009 | 0.000 | 0.000 | 0.000 | 0.000 | 0.000 |
| E34 | 0.207 | 0.160 | 0.000 | 0.000 | 0.000 | 0.000 | 0.000 | 0.000 | 0.000 | 0.000 | 0.000 | 0.000 | 0.000 | 0.000 | 0.036 | 0.000 | 0.000 | 0.000 | 0.000 | 0.000 |
| E35 | 0.000 | 0.000 | 0.000 | 0.000 | 0.000 | 0.000 | 0.000 | 0.000 | 0.000 | 0.000 | 0.000 | 0.000 | 0.000 | 0.000 | 0.000 | 0.156 | 0.000 | 0.000 | 0.000 | 0.000 |
| E36 | 0.000 | 0.000 | 0.000 | 0.010 | 0.000 | 0.000 | 0.000 | 0.000 | 0.000 | 0.000 | 0.000 | 0.000 | 0.000 | 0.000 | 0.024 | 0.000 | 0.000 | 0.000 | 0.000 | 0.000 |
| E37 | 0.000 | 0.000 | 0.013 | 0.000 | 0.007 | 0.009 | 0.000 | 0.000 | 0.000 | 0.000 | 0.000 | 0.010 | 0.007 | 0.007 | 0.058 | 0.053 | 0.000 | 0.425 | 0.000 | 0.000 |
| E38 | 0.000 | 0.000 | 0.064 | 0.051 | 0.037 | 0.043 | 0.000 | 0.000 | 0.000 | 0.000 | 0.000 | 0.031 | 0.034 | 0.034 | 0.185 | 0.457 | 0.000 | 0.000 | 0.000 | 0.000 |
| E39 | 0.000 | 0.000 | 0.000 | 0.000 | 0.000 | 0.000 | 0.000 | 0.000 | 0.000 | 0.000 | 0.000 | 0.000 | 0.000 | 0.000 | 0.000 | 0.000 | 0.029 | 0.011 | 0.000 | 0.000 |
| E40 | 0.000 | 0.000 | 0.000 | 0.000 | 0.000 | 0.000 | 0.000 | 0.036 | 0.000 | 0.024 | 0.018 | 0.000 | 0.038 | 0.000 | 0.015 | 0.000 | 0.044 | 0.037 | 0.020 | 0.000 |
| E41 | 0.105 | 0.081 | 0.000 | 0.202 | 0.000 | 0.000 | 0.000 | 0.000 | 0.000 | 0.000 | 0.000 | 0.000 | 0.000 | 0.000 | 0.000 | 0.000 | 0.018 | 0.021 | 0.000 | 0.000 |
| E42 | 0.000 | 0.000 | 0.000 | 0.000 | 0.000 | 0.000 | 0.000 | 0.062 | 0.000 | 0.049 | 0.054 | 0.087 | 0.000 | 0.000 | 0.065 | 0.000 | 0.151 | 0.066 | 0.099 | 0.099 |
| E43 | 0.000 | 0.000 | 0.000 | 0.000 | 0.032 | 0.000 | 0.000 | 0.020 | 0.000 | 0.014 | 0.040 | 0.046 | 0.085 | 0.074 | 0.039 | 0.000 | 0.110 | 0.070 | 0.000 | 0.000 |
| E44 | 0.000 | 0.000 | 0.000 | 0.000 | 0.105 | 0.000 | 0.000 | 0.144 | 0.000 | 0.105 | 0.136 | 0.187 | 0.199 | 0.240 | 0.101 | 0.000 | 0.259 | 0.147 | 0.000 | 0.020 |
| E45 | 0.000 | 0.000 | 0.000 | 0.000 | 0.010 | 0.000 | 0.000 | 0.009 | 0.000 | 0.007 | 0.010 | 0.016 | 0.016 | 0.022 | 0.008 | 0.000 | 0.019 | 0.010 | 0.000 | 0.000 |
| E46 | 0.000 | 0.000 | 0.100 | 0.091 | 0.000 | 0.000 | 0.000 | 0.000 | 0.063 | 0.000 | 0.000 | 0.045 | 0.045 | 0.045 | 0.043 | 0.106 | 0.000 | 0.039 | 0.000 | 0.000 |
| E47 | 0.000 | 0.000 | 0.014 | 0.000 | 0.000 | 0.000 | 0.000 | 0.000 | 0.013 | 0.004 | 0.078 | 0.005 | 0.005 | 0.005 | 0.006 | 0.015 | 0.134 | 0.039 | 0.000 | 0.000 |
| E48 | 0.000 | 0.000 | 0.000 | 0.000 | 0.000 | 0.000 | 0.000 | 0.082 | 0.000 | 0.014 | 0.000 | 0.000 | 0.000 | 0.000 | 0.000 | 0.000 | 0.000 | 0.000 | 0.129 | 0.000 |
| E49 | 0.000 | 0.000 | 0.000 | 0.000 | 0.000 | 0.000 | 0.000 | 0.000 | 0.000 | 0.000 | 0.000 | 0.000 | 0.000 | 0.000 | 0.000 | 0.000 | 0.000 | 0.000 | 0.000 | 0.514 |
| E50 | 0.000 | 0.000 | 0.000 | 0.000 | 0.000 | 0.000 | 0.000 | 0.000 | 0.000 | 0.000 | 0.000 | 0.012 | 0.012 | 0.012 | 0.000 | 0.000 | 0.000 | 0.000 | 0.000 | 0.000 |
| E51 | 0.000 | 0.000 | 0.000 | 0.000 | 0.000 | 0.000 | 0.000 | 0.000 | 0.000 | 0.042 | 0.000 | 0.000 | 0.000 | 0.000 | 0.000 | 0.000 | 0.000 | 0.000 | 0.386 | 0.000 |
| E52 | 0.000 | 0.000 | 0.000 | 0.000 | 0.000 | 0.000 | 0.000 | 0.000 | 0.000 | 0.000 | 0.000 | 0.000 | 0.000 | 0.000 | 0.000 | 0.000 | 0.000 | 0.000 | 0.000 | 0.000 |
| E53 | 0.000 | 0.000 | 0.000 | 0.000 | 0.000 | 0.000 | 0.000 | 0.000 | 0.000 | 0.000 | 0.000 | 0.000 | 0.000 | 0.000 | 0.000 | 0.000 | 0.000 | 0.000 | 0.000 | 0.000 |
| E54 | 0.000 | 0.000 | 0.000 | 0.000 | 0.000 | 0.000 | 0.000 | 0.000 | 0.000 | 0.000 | 0.000 | 0.000 | 0.000 | 0.000 | 0.000 | 0.000 | 0.000 | 0.000 | 0.000 | 0.000 |

[illegible]

|     | E41   | E42   | E43   | E44   | E45   | E46   | E47   | E48   | E49   | E50   | E51   | E52   | E53   | E54   | Priorities |
|-----|-------|-------|-------|-------|-------|-------|-------|-------|-------|-------|-------|-------|-------|-------|------------|
| E15 | 0.000 | 0.000 | 0.000 | 0.000 | 0.000 | 0.000 | 0.000 | 0.000 | 0.000 | 0.000 | 0.000 | 0.000 | 0.000 | 0.000 | 0.001      |
| E16 | 0.000 | 0.000 | 0.000 | 0.000 | 0.000 | 0.000 | 0.000 | 0.000 | 0.000 | 0.000 | 0.000 | 0.000 | 0.000 | 0.000 | 0.003      |
| E17 | 0.000 | 0.000 | 0.000 | 0.000 | 0.000 | 0.000 | 0.000 | 0.000 | 0.000 | 0.000 | 0.000 | 0.000 | 0.000 | 0.000 | 0.005      |
| E18 | 0.000 | 0.000 | 0.000 | 0.000 | 0.000 | 0.000 | 0.000 | 0.000 | 0.000 | 0.000 | 0.000 | 0.000 | 0.000 | 0.000 | 0.002      |
| E19 | 0.000 | 0.000 | 0.000 | 0.000 | 0.000 | 0.000 | 0.000 | 0.000 | 0.000 | 0.000 | 0.000 | 0.000 | 0.000 | 0.000 | 0.008      |
| E20 | 0.000 | 0.000 | 0.000 | 0.000 | 0.000 | 0.000 | 0.000 | 0.000 | 0.000 | 0.000 | 0.000 | 0.000 | 0.000 | 0.000 | 0.006      |
| E21 | 0.000 | 0.000 | 0.000 | 0.000 | 0.000 | 0.000 | 0.000 | 0.000 | 0.000 | 0.000 | 0.000 | 0.000 | 0.000 | 0.000 | 0.002      |
| E22 | 0.000 | 0.000 | 0.000 | 0.000 | 0.000 | 0.000 | 0.000 | 0.000 | 0.000 | 0.118 | 0.000 | 0.000 | 0.000 | 0.000 | 0.014      |
| E23 | 0.000 | 0.000 | 0.000 | 0.000 | 0.000 | 0.011 | 0.000 | 0.000 | 0.000 | 0.051 | 0.000 | 0.000 | 0.000 | 0.000 | 0.023      |
| E24 | 0.000 | 0.000 | 0.000 | 0.000 | 0.000 | 0.033 | 0.000 | 0.000 | 0.000 | 0.000 | 0.000 | 0.000 | 0.000 | 0.000 | 0.003      |
| E25 | 0.000 | 0.000 | 0.000 | 0.000 | 0.000 | 0.000 | 0.000 | 0.000 | 0.000 | 0.000 | 0.000 | 0.000 | 0.000 | 0.000 | 0.007      |
| E26 | 0.000 | 0.000 | 0.000 | 0.000 | 0.000 | 0.000 | 0.000 | 0.000 | 0.000 | 0.000 | 0.000 | 0.000 | 0.000 | 0.000 | 0.013      |
| E27 | 0.000 | 0.000 | 0.000 | 0.000 | 0.000 | 0.000 | 0.000 | 0.000 | 0.000 | 0.000 | 0.000 | 0.000 | 0.000 | 0.000 | 0.003      |
| E28 | 0.000 | 0.000 | 0.000 | 0.000 | 0.000 | 0.000 | 0.000 | 0.019 | 0.000 | 0.000 | 0.000 | 0.000 | 0.000 | 0.000 | 0.002      |
| E29 | 0.000 | 0.000 | 0.000 | 0.000 | 0.000 | 0.000 | 0.000 | 0.000 | 0.000 | 0.000 | 0.000 | 0.000 | 0.000 | 0.000 | 0.002      |
| E30 | 0.000 | 0.000 | 0.000 | 0.000 | 0.000 | 0.000 | 0.000 | 0.097 | 0.000 | 0.000 | 0.000 | 0.000 | 0.000 | 0.000 | 0.003      |
| E31 | 0.000 | 0.000 | 0.000 | 0.000 | 0.000 | 0.000 | 0.000 | 0.000 | 0.000 | 0.000 | 0.000 | 0.000 | 0.000 | 0.000 | 0.003      |
| E32 | 0.000 | 0.000 | 0.000 | 0.000 | 0.000 | 0.000 | 0.000 | 0.000 | 0.000 | 0.000 | 0.000 | 0.000 | 0.000 | 0.000 | 0.006      |
| E33 | 0.000 | 0.000 | 0.000 | 0.000 | 0.000 | 0.000 | 0.000 | 0.000 | 0.000 | 0.000 | 0.000 | 0.000 | 0.000 | 0.000 | 0.004      |
| E34 | 0.000 | 0.000 | 0.000 | 0.000 | 0.000 | 0.000 | 0.000 | 0.000 | 0.000 | 0.000 | 0.000 | 0.000 | 0.000 | 0.000 | 0.015      |
| E35 | 0.000 | 0.000 | 0.000 | 0.000 | 0.000 | 0.000 | 0.000 | 0.000 | 0.000 | 0.000 | 0.000 | 0.000 | 0.000 | 0.000 | 0.000      |
| E36 | 0.000 | 0.000 | 0.000 | 0.000 | 0.000 | 0.012 | 0.023 | 0.000 | 0.000 | 0.064 | 0.000 | 0.000 | 0.000 | 0.000 | 0.001      |
| E37 | 0.000 | 0.000 | 0.000 | 0.000 | 0.000 | 0.003 | 0.006 | 0.000 | 0.000 | 0.000 | 0.000 | 0.000 | 0.000 | 0.000 | 0.004      |
| E38 | 0.000 | 0.000 | 0.000 | 0.000 | 0.000 | 0.042 | 0.083 | 0.000 | 0.000 | 0.000 | 0.000 | 0.000 | 0.000 | 0.000 | 0.007      |
| E39 | 0.004 | 0.000 | 0.000 | 0.000 | 0.000 | 0.011 | 0.000 | 0.009 | 0.018 | 0.000 | 0.000 | 0.000 | 0.000 | 0.000 | 0.002      |
| E40 | 0.009 | 0.000 | 0.000 | 0.000 | 0.000 | 0.021 | 0.000 | 0.040 | 0.028 | 0.000 | 0.000 | 0.000 | 0.000 | 0.000 | 0.004      |
| E41 | 0.000 | 0.000 | 0.000 | 0.000 | 0.000 | 0.007 | 0.000 | 0.000 | 0.000 | 0.000 | 0.000 | 0.086 | 0.086 | 0.000 | 0.008      |
| E42 | 0.028 | 0.000 | 0.026 | 0.000 | 0.000 | 0.060 | 0.000 | 0.112 | 0.054 | 0.000 | 0.000 | 0.000 | 0.000 | 0.000 | 0.011      |
| E43 | 0.018 | 0.000 | 0.000 | 0.118 | 0.030 | 0.035 | 0.000 | 0.000 | 0.012 | 0.000 | 0.000 | 0.000 | 0.000 | 0.000 | 0.021      |
| E44 | 0.053 | 0.118 | 0.084 | 0.000 | 0.089 | 0.085 | 0.000 | 0.000 | 0.087 | 0.000 | 0.252 | 0.000 | 0.000 | 0.000 | 0.032      |
| E45 | 0.006 | 0.000 | 0.008 | 0.000 | 0.000 | 0.007 | 0.000 | 0.020 | 0.006 | 0.000 | 0.000 | 0.000 | 0.000 | 0.000 | 0.003      |
| E46 | 0.000 | 0.000 | 0.000 | 0.000 | 0.000 | 0.000 | 0.000 | 0.000 | 0.020 | 0.211 | 0.000 | 0.000 | 0.000 | 0.000 | 0.008      |
| E47 | 0.000 | 0.000 | 0.000 | 0.000 | 0.000 | 0.222 | 0.000 | 0.178 | 0.032 | 0.042 | 0.247 | 0.000 | 0.000 | 0.000 | 0.013      |
| E48 | 0.086 | 0.000 | 0.000 | 0.000 | 0.000 | 0.000 | 0.000 | 0.000 | 0.150 | 0.000 | 0.000 | 0.000 | 0.000 | 0.000 | 0.003      |
| E49 | 0.429 | 0.000 | 0.000 | 0.000 | 0.000 | 0.000 | 0.000 | 0.000 | 0.000 | 0.000 | 0.000 | 0.000 | 0.000 | 0.000 | 0.006      |
| E50 | 0.000 | 0.514 | 0.000 | 0.000 | 0.000 | 0.000 | 0.000 | 0.000 | 0.000 | 0.000 | 0.000 | 0.000 | 0.000 | 0.000 | 0.007      |
| E51 | 0.000 | 0.000 | 0.514 | 0.514 | 0.514 | 0.000 | 0.000 | 0.000 | 0.000 | 0.000 | 0.000 | 0.000 | 0.000 | 0.000 | 0.032      |
| E52 | 0.000 | 0.000 | 0.000 | 0.000 | 0.000 | 0.000 | 0.000 | 0.000 | 0.092 | 0.000 | 0.000 | 0.000 | 0.000 | 0.563 | 0.032      |
| E53 | 0.000 | 0.000 | 0.000 | 0.000 | 0.000 | 0.000 | 0.000 | 0.000 | 0.092 | 0.000 | 0.000 | 0.000 | 0.000 | 0.113 | 0.010      |
| E54 | 0.000 | 0.000 | 0.000 | 0.000 | 0.000 | 0.000 | 0.000 | 0.163 | 0.000 | 0.000 | 0.000 | 0.618 | 0.618 | 0.000 | 0.052      |

Table S22. Case 7's X Influence Matrix.

|  | E1 | E2 | E3 | E4 | E5 | E6 | E7 | E8 | E9 | E10 | E11 | E12 | E13 | E14 | E15 | E16 | E17 | E18 | E19 |
|--|----|----|----|----|----|----|----|----|----|-----|-----|-----|-----|-----|-----|-----|-----|-----|-----|
|--|----|----|----|----|----|----|----|----|----|-----|-----|-----|-----|-----|-----|-----|-----|-----|-----|



[illegible]

|     | E1 | E2 | E3 | E4 | E5 | E6 | E7 | E8 | E9 | E10 | E11 | E12 | E13 | E14 | E15 | E16 | E17 | E18 | E19 |
|-----|----|----|----|----|----|----|----|----|----|-----|-----|-----|-----|-----|-----|-----|-----|-----|-----|
| E47 | 0  | 0  | 0  | 0  | 0  | 0  | 0  | 0  | 0  | 0   | 0   | 0   | 0   | 0   | 0   | 0   | 0   | 0   | 0   |
| E48 | 0  | 0  | 0  | 0  | 0  | 0  | 0  | 0  | 0  | 0   | 0   | 0   | 0   | 0   | 0   | 0   | 0   | 0   | 0   |
| E49 | 0  | 0  | 0  | 0  | 0  | 0  | 0  | 0  | 0  | 0   | 0   | 0   | 0   | 0   | 0   | 0   | 0   | 0   | 0   |
| E50 | 0  | 0  | 0  | 0  | 0  | 0  | 0  | 0  | 0  | 0   | 0   | 0   | 0   | 0   | 0   | 0   | 0   | 0   | 0   |
| E51 | 0  | 0  | 0  | 0  | 0  | 0  | 0  | 0  | 0  | 0   | 0   | 0   | 0   | 0   | 0   | 0   | 0   | 0   | 0   |
| E52 | 0  | 0  | 1  | 0  | 0  | 0  | 0  | 0  | 0  | 0   | 0   | 0   | 0   | 0   | 0   | 0   | 0   | 0   | 0   |
| E53 | 1  | 1  | 1  | 1  | 0  | 0  | 0  | 0  | 0  | 0   | 0   | 0   | 0   | 0   | 0   | 0   | 0   | 0   | 0   |
| E54 | 2  | 2  | 1  | 2  | 0  | 4  | 4  | 0  | 0  | 0   | 0   | 0   | 0   | 0   | 0   | 0   | 0   | 0   | 0   |

Table S22. Case 7's X Influence Matrix (continued).

|     | E20 | E21 | E22 | E23 | E24 | E25 | E26 | E27 | E28 | E29 | E30 | E31 | E32 | E33 | E34 | E35 | E36 | E37 | E38 | E39 | E40 |
|-----|-----|-----|-----|-----|-----|-----|-----|-----|-----|-----|-----|-----|-----|-----|-----|-----|-----|-----|-----|-----|-----|
| E1  | 3   | 3   | 3   | 0   | 1   | 0   | 2   | 4   | 0   | 0   | 1   | 1   | 2   | 2   | 3   | 0   | 0   | 0   | 0   | 0   | 0   |
| E2  | 4   | 4   | 4   | 0   | 1   | 1   | 0   | 3   | 4   | 3   | 4   | 4   | 3   | 3   | 1   | 0   | 0   | 1   | 0   | 0   | 0   |
| E3  | 0   | 0   | 0   | 4   | 4   | 0   | 0   | 0   | 0   | 4   | 0   | 0   | 0   | 0   | 0   | 0   | 0   | 0   | 0   | 0   | 0   |
| E4  | 1   | 1   | 1   | 1   | 1   | 1   | 1   | 1   | 2   | 1   | 1   | 2   | 0   | 0   | 1   | 0   | 0   | 0   | 0   | 0   | 0   |
| E5  | 0   | 0   | 0   | 2   | 3   | 0   | 0   | 0   | 0   | 0   | 1   | 0   | 2   | 2   | 2   | 0   | 1   | 1   | 0   | 4   | 3   |
| E6  | 0   | 0   | 0   | 0   | 0   | 0   | 0   | 0   | 0   | 2   | 0   | 2   | 0   | 0   | 0   | 0   | 0   | 0   | 0   | 0   | 0   |
| E7  | 0   | 0   | 0   | 0   | 0   | 0   | 0   | 0   | 0   | 0   | 0   | 0   | 0   | 0   | 0   | 0   | 0   | 0   | 0   | 0   | 0   |
| E8  | 0   | 0   | 0   | 0   | 0   | 0   | 0   | 0   | 0   | 0   | 0   | 0   | 0   | 0   | 0   | 0   | 0   | 0   | 0   | 0   | 0   |
| E9  | 0   | 0   | 0   | 0   | 0   | 0   | 0   | 0   | 0   | 0   | 0   | 0   | 0   | 0   | 0   | 0   | 0   | 0   | 0   | 0   | 0   |
| E10 | 0   | 0   | 0   | 0   | 0   | 0   | 0   | 0   | 0   | 0   | 0   | 0   | 0   | 0   | 0   | 0   | 0   | 0   | 0   | 0   | 0   |
| E11 | 0   | 0   | 0   | 0   | 0   | 0   | 0   | 0   | 0   | 0   | 0   | 0   | 0   | 0   | 0   | 0   | 0   | 0   | 0   | 0   | 0   |
| E12 | 0   | 0   | 0   | 0   | 0   | 0   | 0   | 0   | 0   | 0   | 0   | 0   | 0   | 0   | 0   | 0   | 0   | 0   | 0   | 0   | 0   |
| E13 | 0   | 0   | 0   | 0   | 0   | 0   | 0   | 0   | 0   | 0   | 0   | 0   | 0   | 0   | 0   | 0   | 0   | 0   | 0   | 0   | 0   |
| E14 | 0   | 0   | 0   | 0   | 0   | 0   | 0   | 0   | 0   | 0   | 0   | 0   | 0   | 0   | 0   | 0   | 0   | 0   | 0   | 0   | 0   |
| E15 | 0   | 0   | 0   | 0   | 0   | 0   | 0   | 0   | 0   | 0   | 0   | 0   | 0   | 0   | 0   | 0   | 0   | 0   | 0   | 0   | 0   |
| E16 | 0   | 0   | 0   | 0   | 0   | 0   | 0   | 0   | 0   | 0   | 0   | 0   | 0   | 0   | 0   | 0   | 0   | 0   | 0   | 0   | 0   |
| E17 | 0   | 0   | 0   | 0   | 0   | 0   | 0   | 0   | 0   | 0   | 0   | 0   | 0   | 0   | 0   | 0   | 0   | 0   | 0   | 0   | 0   |
| E18 | 0   | 0   | 0   | 0   | 0   | 0   | 0   | 0   | 0   | 0   | 0   | 0   | 0   | 0   | 0   | 0   | 0   | 0   | 0   | 0   | 0   |
| E19 | 0   | 0   | 0   | 0   | 0   | 0   | 0   | 0   | 0   | 0   | 0   | 0   | 0   | 0   | 0   | 0   | 0   | 0   | 0   | 0   | 0   |
| E20 | 0   | 0   | 2   | 0   | 0   | 0   | 0   | 0   | 0   | 0   | 0   | 0   | 0   | 0   | 0   | 0   | 0   | 0   | 0   | 0   | 0   |
| E21 | 0   | 0   | 1   | 0   | 0   | 0   | 0   | 0   | 0   | 0   | 0   | 0   | 0   | 0   | 0   | 0   | 0   | 0   | 0   | 0   | 0   |
| E22 | 0   | 0   | 0   | 0   | 0   | 0   | 0   | 0   | 0   | 0   | 0   | 0   | 0   | 0   | 0   | 2   | 0   | 0   | 0   | 0   | 0   |
| E23 | 0   | 0   | 0   | 0   | 0   | 4   | 4   | 0   | 0   | 2   | 1   | 0   | 4   | 4   | 3   | 1   | 0   | 0   | 0   | 0   | 0   |
| E24 | 0   | 0   | 0   | 0   | 0   | 0   | 0   | 0   | 0   | 0   | 0   | 0   | 0   | 0   | 0   | 0   | 0   | 0   | 0   | 0   | 0   |
| E25 | 0   | 0   | 0   | 0   | 0   | 0   | 0   | 0   | 0   | 0   | 0   | 0   | 0   | 0   | 0   | 0   | 0   | 0   | 0   | 0   | 0   |
| E26 | 0   | 0   | 0   | 0   | 0   | 0   | 0   | 0   | 0   | 0   | 0   | 0   | 0   | 0   | 0   | 0   | 0   | 0   | 0   | 0   | 0   |
| E27 | 0   | 0   | 0   | 0   | 0   | 0   | 0   | 0   | 0   | 0   | 0   | 0   | 0   | 0   | 0   | 0   | 0   | 0   | 0   | 0   | 0   |
| E28 | 0   | 0   | 0   | 0   | 0   | 0   | 0   | 0   | 0   | 0   | 0   | 0   | 0   | 0   | 0   | 0   | 0   | 0   | 0   | 0   | 0   |
| E29 | 0   | 0   | 0   | 0   | 0   | 0   | 0   | 0   | 0   | 0   | 0   | 0   | 0   | 0   | 0   | 0   | 0   | 0   | 0   | 0   | 0   |
| E30 | 0   | 0   | 0   | 0   | 0   | 0   | 0   | 0   | 1   | 1   | 0   | 0   | 0   | 0   | 0   | 0   | 0   | 0   | 0   | 0   | 0   |
| E31 | 0   | 0   | 0   | 0   | 0   | 0   | 0   | 0   | 0   | 0   | 0   | 0   | 0   | 0   | 0   | 0   | 0   | 0   | 0   | 0   | 0   |
| E32 | 0   | 0   | 1   | 0   | 0   | 0   | 0   | 0   | 0   | 0   | 0   | 0   | 0   | 0   | 0   | 1   | 0   | 0   | 0   | 0   | 0   |
| E33 | 1   | 1   | 0   | 0   | 0   | 0   | 0   | 0   | 0   | 0   | 0   | 0   | 0   | 0   | 0   | 0   | 0   | 0   | 0   | 0   | 0   |
| E34 | 3   | 3   | 3   | 0   | 0   | 0   | 0   | 0   | 0   | 0   | 0   | 0   | 0   | 0   | 0   | 0   | 0   | 0   | 0   | 0   | 0   |
| E35 | 0   | 0   | 0   | 0   | 0   | 0   | 0   | 0   | 0   | 0   | 0   | 0   | 0   | 0   | 0   | 0   | 1   | 0   | 0   | 0   | 0   |

[illegible][illegible]

|     | E41 | E42 | E43 | E44 | E45 | E46 | E47 | E48 | E49 | E50 | E51 | E52 | E53 | E54 |
|-----|-----|-----|-----|-----|-----|-----|-----|-----|-----|-----|-----|-----|-----|-----|
| E25 | 0   | 0   | 0   | 0   | 0   | 0   | 0   | 0   | 0   | 0   | 0   | 0   | 0   | 0   |
| E26 | 0   | 0   | 0   | 0   | 0   | 0   | 0   | 0   | 0   | 0   | 0   | 0   | 0   | 0   |
| E27 | 0   | 0   | 0   | 0   | 0   | 0   | 0   | 0   | 0   | 0   | 0   | 0   | 0   | 0   |
| E28 | 0   | 0   | 0   | 0   | 0   | 0   | 0   | 0   | 0   | 0   | 0   | 0   | 0   | 0   |
| E29 | 0   | 0   | 0   | 0   | 0   | 0   | 0   | 0   | 0   | 0   | 0   | 0   | 0   | 0   |
| E30 | 0   | 0   | 0   | 0   | 0   | 0   | 0   | 1   | 0   | 0   | 0   | 0   | 0   | 0   |
| E31 | 0   | 0   | 0   | 0   | 0   | 0   | 0   | 0   | 0   | 0   | 0   | 0   | 0   | 0   |
| E32 | 0   | 0   | 0   | 0   | 0   | 0   | 0   | 0   | 0   | 0   | 0   | 0   | 0   | 0   |
| E33 | 0   | 0   | 0   | 0   | 0   | 0   | 0   | 0   | 0   | 0   | 0   | 0   | 0   | 0   |
| E34 | 0   | 0   | 0   | 0   | 0   | 0   | 0   | 0   | 0   | 0   | 0   | 0   | 0   | 0   |
| E35 | 0   | 0   | 0   | 0   | 0   | 0   | 0   | 0   | 0   | 0   | 0   | 0   | 0   | 0   |
| E36 | 0   | 0   | 0   | 0   | 0   | 0   | 0   | 0   | 0   | 0   | 0   | 0   | 0   | 0   |
| E37 | 0   | 0   | 0   | 0   | 0   | 0   | 0   | 0   | 0   | 0   | 0   | 0   | 0   | 0   |
| E38 | 0   | 0   | 0   | 0   | 0   | 0   | 0   | 0   | 0   | 0   | 0   | 0   | 0   | 0   |
| E39 | 0   | 0   | 0   | 0   | 0   | 0   | 0   | 0   | 0   | 0   | 0   | 0   | 0   | 0   |
| E40 | 0   | 0   | 0   | 0   | 0   | 0   | 0   | 0   | 0   | 0   | 0   | 0   | 0   | 0   |
| E41 | 0   | 0   | 0   | 0   | 0   | 0   | 0   | 0   | 0   | 0   | 0   | 0   | 0   | 0   |
| E42 | 0   | 0   | 0   | 0   | 0   | 0   | 0   | 1   | 0   | 0   | 0   | 0   | 0   | 0   |
| E43 | 0   | 0   | 0   | 1   | 0   | 0   | 0   | 0   | 0   | 0   | 0   | 0   | 0   | 0   |
| E44 | 0   | 1   | 0   | 0   | 0   | 1   | 0   | 0   | 1   | 0   | 2   | 0   | 0   | 0   |
| E45 | 0   | 0   | 0   | 0   | 0   | 0   | 0   | 0   | 0   | 0   | 0   | 0   | 0   | 0   |
| E46 | 0   | 0   | 0   | 0   | 0   | 0   | 0   | 0   | 0   | 2   | 0   | 0   | 0   | 0   |
| E47 | 0   | 0   | 0   | 0   | 0   | 2   | 0   | 2   | 0   | 0   | 2   | 0   | 0   | 0   |
| E48 | 0   | 0   | 0   | 0   | 0   | 0   | 0   | 0   | 1   | 0   | 0   | 0   | 0   | 0   |
| E49 | 4   | 0   | 0   | 0   | 0   | 0   | 0   | 0   | 0   | 0   | 0   | 0   | 0   | 0   |
| E50 | 0   | 4   | 0   | 0   | 0   | 0   | 0   | 0   | 0   | 0   | 0   | 0   | 0   | 0   |
| E51 | 0   | 0   | 4   | 4   | 4   | 0   | 0   | 0   | 0   | 0   | 0   | 0   | 0   | 0   |
| E52 | 0   | 0   | 0   | 0   | 0   | 0   | 0   | 0   | 1   | 0   | 0   | 0   | 0   | 4   |
| E53 | 0   | 0   | 0   | 0   | 0   | 0   | 0   | 0   | 1   | 0   | 0   | 0   | 0   | 1   |
| E54 | 0   | 0   | 0   | 0   | 0   | 0   | 0   | 2   | 0   | 0   | 0   | 4   | 4   | 0   |

Table S23. Case 7. Weighted Supermatrix and Priorities, according to procedure 1.

[illegible]

[illegible][illegible]

[illegible]

Table S23. Case 7. Weighted Supermatrix and Priorities, according to procedure 1 (continued).

[illegible]

|     | E41   | E42   | E43   | E44   | E45   | E46   | E47   | E48   | E49   | E50   | E51   | E52   | E53   | E54   | Priorities |
|-----|-------|-------|-------|-------|-------|-------|-------|-------|-------|-------|-------|-------|-------|-------|------------|
| E24 | 0.000 | 0.000 | 0.000 | 0.000 | 0.000 | 0.000 | 0.000 | 0.000 | 0.000 | 0.000 | 0.000 | 0.000 | 0.000 | 0.000 | 0.002      |
| E25 | 0.000 | 0.000 | 0.000 | 0.000 | 0.000 | 0.000 | 0.000 | 0.000 | 0.000 | 0.000 | 0.000 | 0.000 | 0.000 | 0.000 | 0.007      |
| E26 | 0.000 | 0.000 | 0.000 | 0.000 | 0.000 | 0.000 | 0.000 | 0.000 | 0.000 | 0.000 | 0.000 | 0.000 | 0.000 | 0.000 | 0.027      |
| E27 | 0.000 | 0.000 | 0.000 | 0.000 | 0.000 | 0.000 | 0.000 | 0.000 | 0.000 | 0.000 | 0.000 | 0.000 | 0.000 | 0.000 | 0.000      |
| E28 | 0.000 | 0.000 | 0.000 | 0.000 | 0.000 | 0.000 | 0.000 | 0.000 | 0.000 | 0.000 | 0.000 | 0.000 | 0.000 | 0.000 | 0.000      |
| E29 | 0.000 | 0.000 | 0.000 | 0.000 | 0.000 | 0.000 | 0.000 | 0.000 | 0.000 | 0.000 | 0.000 | 0.000 | 0.000 | 0.000 | 0.001      |
| E30 | 0.000 | 0.000 | 0.000 | 0.000 | 0.000 | 0.000 | 0.000 | 0.059 | 0.000 | 0.000 | 0.000 | 0.000 | 0.000 | 0.000 | 0.001      |
| E31 | 0.000 | 0.000 | 0.000 | 0.000 | 0.000 | 0.000 | 0.000 | 0.000 | 0.000 | 0.000 | 0.000 | 0.000 | 0.000 | 0.000 | 0.002      |
| E32 | 0.000 | 0.000 | 0.000 | 0.000 | 0.000 | 0.000 | 0.000 | 0.000 | 0.000 | 0.000 | 0.000 | 0.000 | 0.000 | 0.000 | 0.006      |
| E33 | 0.000 | 0.000 | 0.000 | 0.000 | 0.000 | 0.000 | 0.000 | 0.000 | 0.000 | 0.000 | 0.000 | 0.000 | 0.000 | 0.000 | 0.002      |
| E34 | 0.000 | 0.000 | 0.000 | 0.000 | 0.000 | 0.000 | 0.000 | 0.000 | 0.000 | 0.000 | 0.000 | 0.000 | 0.000 | 0.000 | 0.035      |
| E35 | 0.000 | 0.000 | 0.000 | 0.000 | 0.000 | 0.000 | 0.000 | 0.000 | 0.000 | 0.000 | 0.000 | 0.000 | 0.000 | 0.000 | 0.000      |
| E36 | 0.000 | 0.000 | 0.000 | 0.000 | 0.000 | 0.000 | 0.000 | 0.000 | 0.000 | 0.000 | 0.000 | 0.000 | 0.000 | 0.000 | 0.000      |
| E37 | 0.000 | 0.000 | 0.000 | 0.000 | 0.000 | 0.000 | 0.000 | 0.000 | 0.000 | 0.000 | 0.000 | 0.000 | 0.000 | 0.000 | 0.000      |
| E38 | 0.000 | 0.000 | 0.000 | 0.000 | 0.000 | 0.000 | 0.000 | 0.000 | 0.000 | 0.000 | 0.000 | 0.000 | 0.000 | 0.000 | 0.000      |
| E39 | 0.000 | 0.000 | 0.000 | 0.000 | 0.000 | 0.000 | 0.000 | 0.000 | 0.000 | 0.000 | 0.000 | 0.000 | 0.000 | 0.000 | 0.000      |
| E40 | 0.000 | 0.000 | 0.000 | 0.000 | 0.000 | 0.000 | 0.000 | 0.000 | 0.000 | 0.000 | 0.000 | 0.000 | 0.000 | 0.000 | 0.001      |
| E41 | 0.000 | 0.000 | 0.000 | 0.000 | 0.000 | 0.000 | 0.000 | 0.000 | 0.000 | 0.000 | 0.000 | 0.000 | 0.000 | 0.000 | 0.003      |
| E42 | 0.000 | 0.000 | 0.000 | 0.000 | 0.000 | 0.000 | 0.000 | 0.059 | 0.000 | 0.000 | 0.000 | 0.000 | 0.000 | 0.000 | 0.009      |
| E43 | 0.000 | 0.000 | 0.000 | 0.072 | 0.000 | 0.000 | 0.000 | 0.000 | 0.000 | 0.000 | 0.000 | 0.000 | 0.000 | 0.000 | 0.011      |
| E44 | 0.000 | 0.072 | 0.000 | 0.000 | 0.000 | 0.081 | 0.000 | 0.000 | 0.091 | 0.000 | 0.143 | 0.000 | 0.000 | 0.000 | 0.030      |
| E45 | 0.000 | 0.000 | 0.000 | 0.000 | 0.000 | 0.000 | 0.000 | 0.000 | 0.000 | 0.000 | 0.000 | 0.000 | 0.000 | 0.000 | 0.000      |
| E46 | 0.000 | 0.000 | 0.000 | 0.000 | 0.000 | 0.000 | 0.000 | 0.000 | 0.000 | 0.188 | 0.000 | 0.000 | 0.000 | 0.000 | 0.005      |
| E47 | 0.000 | 0.000 | 0.000 | 0.000 | 0.000 | 0.188 | 0.000 | 0.153 | 0.000 | 0.000 | 0.143 | 0.000 | 0.000 | 0.000 | 0.005      |
| E48 | 0.000 | 0.000 | 0.000 | 0.000 | 0.000 | 0.000 | 0.000 | 0.000 | 0.091 | 0.000 | 0.000 | 0.000 | 0.000 | 0.000 | 0.000      |
| E49 | 0.833 | 0.000 | 0.000 | 0.000 | 0.000 | 0.000 | 0.000 | 0.000 | 0.000 | 0.000 | 0.000 | 0.000 | 0.000 | 0.000 | 0.003      |
| E50 | 0.000 | 0.649 | 0.000 | 0.000 | 0.000 | 0.000 | 0.000 | 0.000 | 0.000 | 0.000 | 0.000 | 0.000 | 0.000 | 0.000 | 0.006      |
| E51 | 0.000 | 0.000 | 0.833 | 0.649 | 0.833 | 0.000 | 0.000 | 0.000 | 0.000 | 0.000 | 0.000 | 0.000 | 0.000 | 0.000 | 0.029      |
| E52 | 0.000 | 0.000 | 0.000 | 0.000 | 0.000 | 0.000 | 0.000 | 0.000 | 0.091 | 0.000 | 0.000 | 0.000 | 0.000 | 0.778 | 0.157      |
| E53 | 0.000 | 0.000 | 0.000 | 0.000 | 0.000 | 0.000 | 0.000 | 0.000 | 0.091 | 0.000 | 0.000 | 0.000 | 0.000 | 0.111 | 0.026      |
| E54 | 0.000 | 0.000 | 0.000 | 0.000 | 0.000 | 0.000 | 0.000 | 0.153 | 0.000 | 0.000 | 0.000 | 0.875 | 0.875 | 0.000 | 0.201      |



Table S24. Case 7. Weighted Supermatrix and Priorities, according to procedure 2.

|     | E1    | E2    | E3    | E4    | E5    | E6    | E7    | E8    | E9    | E10   | E11   | E12   | E13   | E14   | E15   | E16   | E17   | E18   | E19   | E20   |
|-----|-------|-------|-------|-------|-------|-------|-------|-------|-------|-------|-------|-------|-------|-------|-------|-------|-------|-------|-------|-------|
| E1  | 0.007 | 0.007 | 0.008 | 0.008 | 0.073 | 0.015 | 0.015 | 0.063 | 0.064 | 0.015 | 0.089 | 0.139 | 0.039 | 0.016 | 0.016 | 0.046 | 0.015 | 0.013 | 0.087 | 0.090 |
| E2  | 0.007 | 0.007 | 0.008 | 0.008 | 0.139 | 0.015 | 0.015 | 0.063 | 0.038 | 0.015 | 0.037 | 0.043 | 0.013 | 0.016 | 0.016 | 0.016 | 0.043 | 0.039 | 0.121 | 0.124 |
| E3  | 0.007 | 0.007 | 0.008 | 0.008 | 0.043 | 0.015 | 0.015 | 0.063 | 0.013 | 0.139 | 0.013 | 0.015 | 0.013 | 0.016 | 0.016 | 0.016 | 0.015 | 0.013 | 0.012 | 0.012 |
| E4  | 0.007 | 0.007 | 0.008 | 0.008 | 0.015 | 0.015 | 0.015 | 0.063 | 0.124 | 0.073 | 0.120 | 0.073 | 0.013 | 0.016 | 0.016 | 0.016 | 0.015 | 0.013 | 0.033 | 0.036 |
| E5  | 0.088 | 0.037 | 0.072 | 0.023 | 0.015 | 0.015 | 0.015 | 0.013 | 0.013 | 0.015 | 0.013 | 0.015 | 0.013 | 0.016 | 0.016 | 0.016 | 0.015 | 0.013 | 0.012 | 0.012 |
| E6  | 0.036 | 0.089 | 0.044 | 0.102 | 0.015 | 0.015 | 0.043 | 0.013 | 0.013 | 0.015 | 0.013 | 0.015 | 0.013 | 0.016 | 0.016 | 0.016 | 0.015 | 0.013 | 0.012 | 0.012 |
| E7  | 0.019 | 0.019 | 0.022 | 0.008 | 0.015 | 0.015 | 0.015 | 0.013 | 0.013 | 0.015 | 0.013 | 0.015 | 0.013 | 0.016 | 0.016 | 0.016 | 0.015 | 0.013 | 0.012 | 0.012 |
| E8  | 0.007 | 0.007 | 0.022 | 0.008 | 0.015 | 0.015 | 0.015 | 0.013 | 0.013 | 0.015 | 0.013 | 0.015 | 0.013 | 0.016 | 0.016 | 0.016 | 0.015 | 0.013 | 0.012 | 0.012 |
| E9  | 0.019 | 0.019 | 0.008 | 0.023 | 0.015 | 0.015 | 0.015 | 0.013 | 0.013 | 0.015 | 0.013 | 0.015 | 0.013 | 0.016 | 0.016 | 0.016 | 0.015 | 0.013 | 0.012 | 0.012 |
| E10 | 0.007 | 0.007 | 0.022 | 0.008 | 0.015 | 0.015 | 0.015 | 0.129 | 0.013 | 0.015 | 0.013 | 0.015 | 0.013 | 0.016 | 0.016 | 0.016 | 0.015 | 0.013 | 0.012 | 0.012 |
| E11 | 0.036 | 0.019 | 0.008 | 0.008 | 0.015 | 0.015 | 0.015 | 0.013 | 0.013 | 0.015 | 0.013 | 0.015 | 0.013 | 0.016 | 0.016 | 0.016 | 0.015 | 0.013 | 0.012 | 0.012 |
| E12 | 0.007 | 0.007 | 0.008 | 0.008 | 0.015 | 0.015 | 0.015 | 0.013 | 0.124 | 0.015 | 0.120 | 0.015 | 0.013 | 0.016 | 0.016 | 0.016 | 0.015 | 0.013 | 0.012 | 0.012 |
| E13 | 0.007 | 0.007 | 0.008 | 0.008 | 0.015 | 0.015 | 0.015 | 0.013 | 0.013 | 0.043 | 0.013 | 0.015 | 0.013 | 0.145 | 0.144 | 0.144 | 0.015 | 0.132 | 0.012 | 0.012 |
| E14 | 0.007 | 0.007 | 0.022 | 0.008 | 0.015 | 0.015 | 0.015 | 0.013 | 0.013 | 0.015 | 0.013 | 0.015 | 0.013 | 0.016 | 0.016 | 0.016 | 0.015 | 0.013 | 0.012 | 0.012 |
| E15 | 0.007 | 0.007 | 0.022 | 0.008 | 0.015 | 0.015 | 0.015 | 0.013 | 0.013 | 0.015 | 0.013 | 0.015 | 0.013 | 0.016 | 0.016 | 0.016 | 0.015 | 0.013 | 0.012 | 0.012 |
| E16 | 0.007 | 0.007 | 0.008 | 0.008 | 0.015 | 0.015 | 0.015 | 0.013 | 0.013 | 0.015 | 0.013 | 0.015 | 0.013 | 0.016 | 0.046 | 0.016 | 0.015 | 0.013 | 0.012 | 0.012 |
| E17 | 0.036 | 0.037 | 0.008 | 0.023 | 0.015 | 0.015 | 0.015 | 0.013 | 0.013 | 0.015 | 0.013 | 0.015 | 0.013 | 0.016 | 0.016 | 0.016 | 0.015 | 0.013 | 0.012 | 0.012 |
| E18 | 0.007 | 0.007 | 0.008 | 0.008 | 0.015 | 0.015 | 0.015 | 0.013 | 0.013 | 0.015 | 0.013 | 0.015 | 0.134 | 0.016 | 0.016 | 0.016 | 0.015 | 0.013 | 0.012 | 0.012 |
| E19 | 0.036 | 0.037 | 0.044 | 0.044 | 0.015 | 0.015 | 0.015 | 0.013 | 0.013 | 0.015 | 0.013 | 0.015 | 0.013 | 0.016 | 0.016 | 0.016 | 0.015 | 0.013 | 0.012 | 0.012 |
| E20 | 0.019 | 0.019 | 0.022 | 0.023 | 0.015 | 0.015 | 0.015 | 0.013 | 0.013 | 0.015 | 0.013 | 0.015 | 0.013 | 0.016 | 0.016 | 0.016 | 0.015 | 0.013 | 0.012 | 0.012 |
| E21 | 0.007 | 0.007 | 0.008 | 0.008 | 0.015 | 0.015 | 0.015 | 0.013 | 0.013 | 0.015 | 0.013 | 0.015 | 0.013 | 0.016 | 0.016 | 0.016 | 0.015 | 0.013 | 0.012 | 0.012 |
| E22 | 0.088 | 0.089 | 0.104 | 0.070 | 0.015 | 0.015 | 0.015 | 0.013 | 0.013 | 0.015 | 0.013 | 0.015 | 0.013 | 0.016 | 0.016 | 0.016 | 0.015 | 0.013 | 0.012 | 0.012 |
| E23 | 0.019 | 0.019 | 0.104 | 0.023 | 0.015 | 0.015 | 0.015 | 0.013 | 0.013 | 0.015 | 0.013 | 0.015 | 0.013 | 0.016 | 0.016 | 0.016 | 0.015 | 0.013 | 0.012 | 0.012 |
| E24 | 0.007 | 0.007 | 0.044 | 0.008 | 0.015 | 0.015 | 0.015 | 0.013 | 0.013 | 0.015 | 0.013 | 0.015 | 0.013 | 0.016 | 0.016 | 0.016 | 0.015 | 0.013 | 0.012 | 0.012 |
| E25 | 0.036 | 0.037 | 0.008 | 0.044 | 0.015 | 0.015 | 0.015 | 0.013 | 0.013 | 0.015 | 0.013 | 0.015 | 0.013 | 0.016 | 0.016 | 0.016 | 0.015 | 0.013 | 0.012 | 0.012 |
| E26 | 0.088 | 0.089 | 0.008 | 0.102 | 0.015 | 0.015 | 0.015 | 0.013 | 0.013 | 0.015 | 0.013 | 0.015 | 0.013 | 0.016 | 0.016 | 0.016 | 0.015 | 0.013 | 0.059 | 0.012 |
| E27 | 0.007 | 0.007 | 0.008 | 0.008 | 0.015 | 0.015 | 0.015 | 0.013 | 0.013 | 0.015 | 0.013 | 0.015 | 0.013 | 0.016 | 0.016 | 0.016 | 0.015 | 0.013 | 0.012 | 0.012 |
| E28 | 0.007 | 0.007 | 0.008 | 0.008 | 0.015 | 0.015 | 0.015 | 0.013 | 0.013 | 0.015 | 0.013 | 0.015 | 0.013 | 0.016 | 0.016 | 0.016 | 0.015 | 0.013 | 0.012 | 0.012 |
| E29 | 0.007 | 0.007 | 0.022 | 0.023 | 0.015 | 0.015 | 0.015 | 0.013 | 0.013 | 0.015 | 0.013 | 0.015 | 0.013 | 0.016 | 0.016 | 0.016 | 0.015 | 0.013 | 0.012 | 0.012 |
| E30 | 0.019 | 0.007 | 0.008 | 0.008 | 0.015 | 0.015 | 0.015 | 0.013 | 0.013 | 0.015 | 0.013 | 0.015 | 0.013 | 0.016 | 0.016 | 0.016 | 0.015 | 0.013 | 0.012 | 0.012 |
| E31 | 0.007 | 0.019 | 0.008 | 0.008 | 0.015 | 0.015 | 0.015 | 0.013 | 0.013 | 0.015 | 0.013 | 0.015 | 0.013 | 0.016 | 0.016 | 0.016 | 0.015 | 0.013 | 0.012 | 0.012 |
| E32 | 0.019 | 0.019 | 0.044 | 0.008 | 0.015 | 0.015 | 0.015 | 0.013 | 0.013 | 0.015 | 0.013 | 0.015 | 0.013 | 0.016 | 0.016 | 0.016 | 0.015 | 0.013 | 0.012 | 0.012 |
| E33 | 0.007 | 0.007 | 0.022 | 0.008 | 0.015 | 0.015 | 0.015 | 0.013 | 0.013 | 0.015 | 0.013 | 0.015 | 0.013 | 0.016 | 0.016 | 0.016 | 0.015 | 0.013 | 0.033 | 0.036 |
| E34 | 0.088 | 0.089 | 0.008 | 0.070 | 0.015 | 0.015 | 0.015 | 0.013 | 0.013 | 0.015 | 0.013 | 0.015 | 0.013 | 0.016 | 0.016 | 0.016 | 0.015 | 0.013 | 0.087 | 0.090 |
| E35 | 0.007 | 0.007 | 0.008 | 0.008 | 0.015 | 0.015 | 0.015 | 0.013 | 0.013 | 0.015 | 0.013 | 0.015 | 0.013 | 0.016 | 0.016 | 0.016 | 0.015 | 0.013 | 0.012 | 0.012 |
| E36 | 0.007 | 0.007 | 0.008 | 0.008 | 0.015 | 0.015 | 0.015 | 0.013 | 0.013 | 0.015 | 0.013 | 0.015 | 0.013 | 0.016 | 0.016 | 0.016 | 0.015 | 0.013 | 0.012 | 0.012 |
| E37 | 0.007 | 0.007 | 0.008 | 0.008 | 0.015 | 0.015 | 0.015 | 0.013 | 0.013 | 0.015 | 0.013 | 0.015 | 0.013 | 0.016 | 0.016 | 0.016 | 0.015 | 0.013 | 0.012 | 0.012 |
| E38 | 0.007 | 0.007 | 0.008 | 0.008 | 0.015 | 0.015 | 0.015 | 0.013 | 0.013 | 0.015 | 0.013 | 0.015 | 0.013 | 0.016 | 0.016 | 0.016 | 0.015 | 0.013 | 0.012 | 0.012 |
| E39 | 0.007 | 0.007 | 0.008 | 0.008 | 0.015 | 0.015 | 0.015 | 0.013 | 0.013 | 0.015 | 0.013 | 0.015 | 0.013 | 0.016 | 0.016 | 0.016 | 0.015 | 0.013 | 0.012 | 0.012 |
| E40 | 0.007 | 0.007 | 0.008 | 0.008 | 0.015 | 0.015 | 0.015 | 0.013 | 0.013 | 0.015 | 0.013 | 0.015 | 0.013 | 0.016 | 0.016 | 0.016 | 0.073 | 0.013 | 0.012 | 0.012 |
| E41 | 0.007 | 0.007 | 0.008 | 0.008 | 0.015 | 0.015 | 0.015 | 0.013 | 0.013 | 0.015 | 0.013 | 0.015 | 0.013 | 0.016 | 0.016 | 0.016 | 0.015 | 0.013 | 0.033 | 0.036 |
| E42 | 0.019 | 0.019 | 0.022 | 0.023 | 0.015 | 0.015 | 0.015 | 0.013 | 0.013 | 0.015 | 0.013 | 0.015 | 0.039 | 0.016 | 0.016 | 0.016 | 0.139 | 0.039 | 0.012 | 0.012 |
| E43 | 0.007 | 0.007 | 0.008 | 0.008 | 0.015 | 0.075 | 0.073 | 0.013 | 0.013 | 0.015 | 0.013 | 0.015 | 0.068 | 0.016 | 0.016 | 0.016 | 0.015 | 0.039 | 0.012 | 0.012 |
| E44 | 0.036 | 0.037 | 0.008 | 0.023 | 0.015 | 0.015 | 0.015 | 0.013 | 0.013 | 0.015 | 0.013 | 0.015 | 0.068 | 0.016 | 0.016 | 0.016 | 0.015 | 0.098 | 0.012 | 0.012 |
| E45 | 0.007 | 0.007 | 0.008 | 0.008 | 0.015 | 0.015 | 0.015 | 0.013 | 0.013 | 0.015 | 0.013 | 0.015 | 0.013 | 0.016 | 0.016 | 0.016 | 0.015 | 0.013 | 0.012 | 0.012 |

|     | E1    | E2    | E3    | E4    | E5    | E6    | E7    | E8    | E9    | E10   | E11   | E12   | E13   | E14   | E15   | E16   | E17   | E18   | E19   | E20   |
|-----|-------|-------|-------|-------|-------|-------|-------|-------|-------|-------|-------|-------|-------|-------|-------|-------|-------|-------|-------|-------|
| E46 | 0.007 | 0.007 | 0.008 | 0.008 | 0.015 | 0.015 | 0.015 | 0.013 | 0.013 | 0.015 | 0.013 | 0.015 | 0.013 | 0.016 | 0.016 | 0.016 | 0.015 | 0.013 | 0.012 | 0.012 |
| E47 | 0.007 | 0.007 | 0.008 | 0.008 | 0.015 | 0.015 | 0.015 | 0.013 | 0.013 | 0.015 | 0.013 | 0.015 | 0.013 | 0.016 | 0.016 | 0.016 | 0.015 | 0.013 | 0.012 | 0.012 |
| E48 | 0.007 | 0.007 | 0.008 | 0.008 | 0.015 | 0.015 | 0.015 | 0.013 | 0.013 | 0.015 | 0.013 | 0.015 | 0.013 | 0.016 | 0.016 | 0.016 | 0.015 | 0.013 | 0.012 | 0.012 |
| E49 | 0.007 | 0.007 | 0.008 | 0.008 | 0.015 | 0.015 | 0.015 | 0.013 | 0.013 | 0.015 | 0.013 | 0.015 | 0.013 | 0.016 | 0.016 | 0.016 | 0.015 | 0.013 | 0.012 | 0.012 |
| E50 | 0.007 | 0.007 | 0.008 | 0.008 | 0.015 | 0.015 | 0.015 | 0.013 | 0.013 | 0.015 | 0.013 | 0.015 | 0.013 | 0.016 | 0.016 | 0.016 | 0.015 | 0.013 | 0.012 | 0.012 |
| E51 | 0.007 | 0.007 | 0.008 | 0.008 | 0.015 | 0.015 | 0.015 | 0.013 | 0.013 | 0.015 | 0.013 | 0.015 | 0.013 | 0.016 | 0.016 | 0.016 | 0.015 | 0.013 | 0.012 | 0.012 |
| E52 | 0.007 | 0.007 | 0.022 | 0.008 | 0.015 | 0.015 | 0.015 | 0.013 | 0.013 | 0.015 | 0.013 | 0.015 | 0.013 | 0.016 | 0.016 | 0.016 | 0.015 | 0.013 | 0.012 | 0.012 |
| E53 | 0.019 | 0.019 | 0.022 | 0.023 | 0.015 | 0.015 | 0.015 | 0.013 | 0.013 | 0.015 | 0.013 | 0.015 | 0.013 | 0.016 | 0.016 | 0.016 | 0.015 | 0.013 | 0.012 | 0.012 |
| E54 | 0.036 | 0.037 | 0.022 | 0.044 | 0.015 | 0.140 | 0.139 | 0.013 | 0.013 | 0.015 | 0.013 | 0.015 | 0.013 | 0.016 | 0.016 | 0.016 | 0.015 | 0.013 | 0.012 | 0.012 |

|     | E21   | E22   | E23   | E24   | E25   | E26   | E27   | E28   | E29   | E30   | E31   | E32   | E33   | E34   | E35   | E36   | E37   | E38   | E39   | E40   |
|-----|-------|-------|-------|-------|-------|-------|-------|-------|-------|-------|-------|-------|-------|-------|-------|-------|-------|-------|-------|-------|
| E1  | 0.090 | 0.086 | 0.014 | 0.033 | 0.015 | 0.073 | 0.134 | 0.013 | 0.012 | 0.039 | 0.036 | 0.052 | 0.053 | 0.087 | 0.012 | 0.015 | 0.013 | 0.016 | 0.013 | 0.015 |
| E2  | 0.124 | 0.120 | 0.014 | 0.033 | 0.043 | 0.015 | 0.100 | 0.134 | 0.091 | 0.135 | 0.130 | 0.079 | 0.080 | 0.033 | 0.012 | 0.015 | 0.036 | 0.016 | 0.013 | 0.015 |
| E3  | 0.012 | 0.011 | 0.138 | 0.116 | 0.015 | 0.015 | 0.014 | 0.013 | 0.125 | 0.013 | 0.013 | 0.011 | 0.011 | 0.012 | 0.012 | 0.015 | 0.013 | 0.016 | 0.013 | 0.015 |
| E4  | 0.036 | 0.032 | 0.042 | 0.033 | 0.043 | 0.043 | 0.042 | 0.068 | 0.034 | 0.039 | 0.064 | 0.011 | 0.011 | 0.033 | 0.012 | 0.015 | 0.013 | 0.016 | 0.013 | 0.015 |
| E5  | 0.012 | 0.011 | 0.072 | 0.085 | 0.015 | 0.015 | 0.014 | 0.013 | 0.012 | 0.039 | 0.013 | 0.052 | 0.053 | 0.059 | 0.012 | 0.043 | 0.036 | 0.016 | 0.126 | 0.102 |
| E6  | 0.012 | 0.011 | 0.014 | 0.011 | 0.015 | 0.015 | 0.014 | 0.013 | 0.061 | 0.013 | 0.064 | 0.011 | 0.011 | 0.012 | 0.012 | 0.015 | 0.013 | 0.016 | 0.013 | 0.015 |
| E7  | 0.012 | 0.011 | 0.014 | 0.011 | 0.015 | 0.015 | 0.014 | 0.013 | 0.012 | 0.013 | 0.013 | 0.011 | 0.011 | 0.012 | 0.012 | 0.015 | 0.013 | 0.016 | 0.013 | 0.015 |
| E8  | 0.012 | 0.011 | 0.014 | 0.011 | 0.015 | 0.015 | 0.014 | 0.013 | 0.012 | 0.013 | 0.013 | 0.011 | 0.011 | 0.012 | 0.012 | 0.015 | 0.013 | 0.016 | 0.013 | 0.015 |
| E9  | 0.012 | 0.011 | 0.014 | 0.011 | 0.015 | 0.015 | 0.014 | 0.013 | 0.012 | 0.013 | 0.013 | 0.011 | 0.011 | 0.012 | 0.012 | 0.015 | 0.013 | 0.016 | 0.013 | 0.015 |
| E10 | 0.012 | 0.011 | 0.014 | 0.011 | 0.015 | 0.015 | 0.014 | 0.013 | 0.012 | 0.013 | 0.013 | 0.011 | 0.011 | 0.012 | 0.012 | 0.015 | 0.013 | 0.016 | 0.013 | 0.015 |
| E11 | 0.012 | 0.011 | 0.014 | 0.011 | 0.015 | 0.015 | 0.014 | 0.013 | 0.012 | 0.013 | 0.013 | 0.011 | 0.011 | 0.012 | 0.012 | 0.015 | 0.013 | 0.016 | 0.013 | 0.015 |
| E12 | 0.012 | 0.011 | 0.014 | 0.011 | 0.015 | 0.015 | 0.014 | 0.013 | 0.012 | 0.013 | 0.013 | 0.011 | 0.011 | 0.012 | 0.012 | 0.015 | 0.013 | 0.016 | 0.013 | 0.015 |
| E13 | 0.012 | 0.011 | 0.014 | 0.011 | 0.015 | 0.015 | 0.014 | 0.013 | 0.012 | 0.013 | 0.013 | 0.011 | 0.011 | 0.012 | 0.012 | 0.015 | 0.013 | 0.016 | 0.013 | 0.015 |
| E14 | 0.012 | 0.011 | 0.014 | 0.011 | 0.015 | 0.015 | 0.014 | 0.013 | 0.012 | 0.013 | 0.013 | 0.011 | 0.011 | 0.012 | 0.012 | 0.015 | 0.013 | 0.016 | 0.013 | 0.015 |
| E15 | 0.012 | 0.011 | 0.014 | 0.011 | 0.015 | 0.015 | 0.014 | 0.013 | 0.012 | 0.013 | 0.013 | 0.011 | 0.011 | 0.012 | 0.012 | 0.015 | 0.013 | 0.016 | 0.013 | 0.015 |
| E16 | 0.012 | 0.011 | 0.014 | 0.011 | 0.015 | 0.015 | 0.014 | 0.013 | 0.012 | 0.013 | 0.013 | 0.011 | 0.011 | 0.012 | 0.012 | 0.015 | 0.013 | 0.016 | 0.013 | 0.015 |
| E17 | 0.012 | 0.011 | 0.014 | 0.011 | 0.015 | 0.015 | 0.014 | 0.013 | 0.012 | 0.013 | 0.013 | 0.011 | 0.011 | 0.012 | 0.012 | 0.015 | 0.013 | 0.016 | 0.013 | 0.015 |
| E18 | 0.012 | 0.011 | 0.014 | 0.011 | 0.015 | 0.015 | 0.014 | 0.013 | 0.012 | 0.013 | 0.013 | 0.011 | 0.011 | 0.012 | 0.012 | 0.015 | 0.013 | 0.016 | 0.013 | 0.015 |
| E19 | 0.012 | 0.011 | 0.014 | 0.011 | 0.015 | 0.015 | 0.014 | 0.013 | 0.012 | 0.013 | 0.013 | 0.011 | 0.011 | 0.012 | 0.012 | 0.015 | 0.013 | 0.016 | 0.013 | 0.015 |
| E20 | 0.012 | 0.058 | 0.014 | 0.011 | 0.015 | 0.015 | 0.014 | 0.013 | 0.012 | 0.013 | 0.013 | 0.011 | 0.011 | 0.012 | 0.012 | 0.015 | 0.013 | 0.016 | 0.013 | 0.015 |
| E21 | 0.012 | 0.032 | 0.014 | 0.011 | 0.015 | 0.015 | 0.014 | 0.013 | 0.012 | 0.013 | 0.013 | 0.011 | 0.011 | 0.012 | 0.012 | 0.015 | 0.013 | 0.016 | 0.013 | 0.015 |
| E22 | 0.012 | 0.011 | 0.014 | 0.011 | 0.015 | 0.015 | 0.014 | 0.013 | 0.012 | 0.013 | 0.013 | 0.011 | 0.011 | 0.012 | 0.064 | 0.015 | 0.013 | 0.016 | 0.013 | 0.015 |
| E23 | 0.012 | 0.011 | 0.014 | 0.011 | 0.141 | 0.139 | 0.014 | 0.013 | 0.061 | 0.039 | 0.013 | 0.111 | 0.111 | 0.087 | 0.035 | 0.015 | 0.013 | 0.016 | 0.013 | 0.015 |
| E24 | 0.012 | 0.011 | 0.014 | 0.011 | 0.015 | 0.015 | 0.014 | 0.013 | 0.012 | 0.013 | 0.013 | 0.011 | 0.011 | 0.012 | 0.012 | 0.015 | 0.013 | 0.016 | 0.013 | 0.015 |
| E25 | 0.012 | 0.011 | 0.014 | 0.011 | 0.015 | 0.015 | 0.014 | 0.013 | 0.012 | 0.013 | 0.013 | 0.011 | 0.011 | 0.012 | 0.012 | 0.015 | 0.013 | 0.016 | 0.013 | 0.015 |
| E26 | 0.012 | 0.011 | 0.014 | 0.011 | 0.015 | 0.015 | 0.014 | 0.013 | 0.012 | 0.013 | 0.013 | 0.011 | 0.011 | 0.012 | 0.012 | 0.015 | 0.013 | 0.016 | 0.013 | 0.015 |
| E27 | 0.012 | 0.011 | 0.014 | 0.011 | 0.015 | 0.015 | 0.014 | 0.013 | 0.012 | 0.013 | 0.013 | 0.011 | 0.011 | 0.012 | 0.012 | 0.015 | 0.013 | 0.016 | 0.013 | 0.015 |
| E28 | 0.012 | 0.011 | 0.014 | 0.011 | 0.015 | 0.015 | 0.014 | 0.013 | 0.012 | 0.013 | 0.013 | 0.011 | 0.011 | 0.012 | 0.012 | 0.015 | 0.013 | 0.016 | 0.013 | 0.015 |
| E29 | 0.012 | 0.011 | 0.014 | 0.011 | 0.015 | 0.015 | 0.014 | 0.013 | 0.012 | 0.013 | 0.013 | 0.011 | 0.011 | 0.012 | 0.012 | 0.015 | 0.013 | 0.016 | 0.013 | 0.015 |
| E30 | 0.012 | 0.011 | 0.014 | 0.011 | 0.015 | 0.015 | 0.014 | 0.039 | 0.034 | 0.013 | 0.013 | 0.011 | 0.011 | 0.012 | 0.012 | 0.015 | 0.013 | 0.016 | 0.013 | 0.015 |
| E31 | 0.012 | 0.011 | 0.014 | 0.011 | 0.015 | 0.015 | 0.014 | 0.013 | 0.012 | 0.013 | 0.013 | 0.011 | 0.011 | 0.012 | 0.012 | 0.015 | 0.013 | 0.016 | 0.013 | 0.015 |
| E32 | 0.012 | 0.032 | 0.014 | 0.011 | 0.015 | 0.015 | 0.014 | 0.013 | 0.012 | 0.013 | 0.013 | 0.011 | 0.011 | 0.012 | 0.035 | 0.015 | 0.013 | 0.016 | 0.013 | 0.015 |
| E33 | 0.036 | 0.011 | 0.014 | 0.011 | 0.015 | 0.015 | 0.014 | 0.013 | 0.012 | 0.013 | 0.013 | 0.011 | 0.011 | 0.012 | 0.012 | 0.015 | 0.013 | 0.016 | 0.013 | 0.015 |
| E34 | 0.090 | 0.086 | 0.014 | 0.011 | 0.015 | 0.015 | 0.014 | 0.013 | 0.012 | 0.013 | 0.013 | 0.011 | 0.011 | 0.012 | 0.012 | 0.015 | 0.013 | 0.016 | 0.013 | 0.015 |

|     | E21   | E22   | E23   | E24   | E25   | E26   | E27   | E28   | E29   | E30   | E31   | E32   | E33   | E34   | E35   | E36   | E37   | E38   | E39   | E40   |
|-----|-------|-------|-------|-------|-------|-------|-------|-------|-------|-------|-------|-------|-------|-------|-------|-------|-------|-------|-------|-------|
| E35 | 0.012 | 0.011 | 0.014 | 0.011 | 0.015 | 0.015 | 0.014 | 0.013 | 0.012 | 0.013 | 0.013 | 0.011 | 0.011 | 0.012 | 0.012 | 0.043 | 0.013 | 0.016 | 0.013 | 0.015 |
| E36 | 0.012 | 0.011 | 0.014 | 0.011 | 0.015 | 0.015 | 0.014 | 0.013 | 0.012 | 0.013 | 0.013 | 0.011 | 0.011 | 0.012 | 0.012 | 0.015 | 0.013 | 0.016 | 0.013 | 0.015 |
| E37 | 0.012 | 0.011 | 0.014 | 0.011 | 0.015 | 0.015 | 0.014 | 0.013 | 0.012 | 0.013 | 0.013 | 0.011 | 0.011 | 0.012 | 0.035 | 0.015 | 0.013 | 0.144 | 0.013 | 0.015 |
| E38 | 0.012 | 0.011 | 0.014 | 0.033 | 0.015 | 0.015 | 0.014 | 0.013 | 0.012 | 0.013 | 0.013 | 0.011 | 0.011 | 0.012 | 0.130 | 0.141 | 0.013 | 0.016 | 0.013 | 0.015 |
| E39 | 0.012 | 0.011 | 0.014 | 0.011 | 0.015 | 0.015 | 0.014 | 0.013 | 0.012 | 0.013 | 0.013 | 0.011 | 0.011 | 0.012 | 0.012 | 0.015 | 0.013 | 0.016 | 0.013 | 0.015 |
| E40 | 0.012 | 0.011 | 0.014 | 0.011 | 0.015 | 0.015 | 0.014 | 0.013 | 0.012 | 0.013 | 0.013 | 0.011 | 0.011 | 0.012 | 0.012 | 0.015 | 0.013 | 0.016 | 0.013 | 0.015 |
| E41 | 0.036 | 0.032 | 0.014 | 0.116 | 0.015 | 0.015 | 0.014 | 0.013 | 0.012 | 0.013 | 0.013 | 0.011 | 0.011 | 0.012 | 0.012 | 0.015 | 0.013 | 0.016 | 0.013 | 0.015 |
| E42 | 0.012 | 0.011 | 0.014 | 0.011 | 0.015 | 0.015 | 0.014 | 0.013 | 0.012 | 0.013 | 0.013 | 0.052 | 0.011 | 0.012 | 0.035 | 0.015 | 0.064 | 0.016 | 0.039 | 0.015 |
| E43 | 0.012 | 0.011 | 0.014 | 0.011 | 0.015 | 0.015 | 0.014 | 0.013 | 0.012 | 0.013 | 0.013 | 0.030 | 0.053 | 0.033 | 0.035 | 0.015 | 0.064 | 0.016 | 0.013 | 0.015 |
| E44 | 0.012 | 0.011 | 0.014 | 0.011 | 0.043 | 0.015 | 0.014 | 0.068 | 0.012 | 0.069 | 0.064 | 0.111 | 0.111 | 0.121 | 0.064 | 0.015 | 0.130 | 0.046 | 0.013 | 0.015 |
| E45 | 0.012 | 0.011 | 0.014 | 0.011 | 0.015 | 0.015 | 0.014 | 0.013 | 0.012 | 0.013 | 0.013 | 0.011 | 0.011 | 0.012 | 0.012 | 0.015 | 0.013 | 0.016 | 0.013 | 0.015 |
| E46 | 0.012 | 0.011 | 0.042 | 0.033 | 0.015 | 0.015 | 0.014 | 0.013 | 0.034 | 0.013 | 0.013 | 0.030 | 0.031 | 0.012 | 0.035 | 0.043 | 0.013 | 0.016 | 0.013 | 0.015 |
| E47 | 0.012 | 0.011 | 0.014 | 0.011 | 0.015 | 0.015 | 0.014 | 0.013 | 0.012 | 0.013 | 0.036 | 0.011 | 0.011 | 0.012 | 0.012 | 0.015 | 0.064 | 0.016 | 0.013 | 0.015 |
| E48 | 0.012 | 0.011 | 0.014 | 0.011 | 0.015 | 0.015 | 0.014 | 0.039 | 0.012 | 0.013 | 0.013 | 0.011 | 0.011 | 0.012 | 0.012 | 0.015 | 0.013 | 0.016 | 0.039 | 0.015 |
| E49 | 0.012 | 0.011 | 0.014 | 0.011 | 0.015 | 0.015 | 0.014 | 0.013 | 0.012 | 0.013 | 0.013 | 0.011 | 0.011 | 0.012 | 0.012 | 0.015 | 0.013 | 0.016 | 0.013 | 0.135 |
| E50 | 0.012 | 0.011 | 0.014 | 0.011 | 0.015 | 0.015 | 0.014 | 0.013 | 0.012 | 0.013 | 0.013 | 0.011 | 0.011 | 0.012 | 0.012 | 0.015 | 0.013 | 0.016 | 0.013 | 0.015 |
| E51 | 0.012 | 0.011 | 0.014 | 0.011 | 0.015 | 0.015 | 0.014 | 0.013 | 0.012 | 0.013 | 0.013 | 0.011 | 0.011 | 0.012 | 0.012 | 0.015 | 0.013 | 0.016 | 0.126 | 0.015 |
| E52 | 0.012 | 0.011 | 0.014 | 0.011 | 0.015 | 0.015 | 0.014 | 0.013 | 0.012 | 0.013 | 0.013 | 0.011 | 0.011 | 0.012 | 0.012 | 0.015 | 0.013 | 0.016 | 0.013 | 0.015 |
| E53 | 0.012 | 0.011 | 0.014 | 0.011 | 0.015 | 0.015 | 0.014 | 0.013 | 0.012 | 0.013 | 0.013 | 0.011 | 0.011 | 0.012 | 0.012 | 0.015 | 0.013 | 0.016 | 0.013 | 0.015 |
| E54 | 0.012 | 0.011 | 0.014 | 0.011 | 0.015 | 0.015 | 0.014 | 0.013 | 0.012 | 0.013 | 0.013 | 0.011 | 0.011 | 0.012 | 0.012 | 0.015 | 0.013 | 0.016 | 0.013 | 0.015 |

Table S24. Case 7. Weighted Supermatrix and Priorities, according to procedure 2 (continued).

|     | E41   | E42   | E43   | E44   | E45   | E46   | E47   | E48   | E49   | E50   | E51   | E52   | E53   | E54   | Priorities |
|-----|-------|-------|-------|-------|-------|-------|-------|-------|-------|-------|-------|-------|-------|-------|------------|
| E1  | 0.015 | 0.014 | 0.015 | 0.014 | 0.015 | 0.015 | 0.016 | 0.013 | 0.014 | 0.015 | 0.014 | 0.016 | 0.016 | 0.015 | 0.033      |
| E2  | 0.015 | 0.014 | 0.015 | 0.014 | 0.015 | 0.015 | 0.016 | 0.013 | 0.014 | 0.015 | 0.014 | 0.046 | 0.046 | 0.045 | 0.042      |
| E3  | 0.015 | 0.014 | 0.015 | 0.014 | 0.015 | 0.015 | 0.016 | 0.013 | 0.014 | 0.015 | 0.014 | 0.016 | 0.016 | 0.015 | 0.023      |
| E4  | 0.015 | 0.014 | 0.015 | 0.014 | 0.015 | 0.015 | 0.016 | 0.013 | 0.014 | 0.015 | 0.014 | 0.016 | 0.016 | 0.015 | 0.025      |
| E5  | 0.015 | 0.100 | 0.015 | 0.014 | 0.015 | 0.139 | 0.145 | 0.134 | 0.140 | 0.139 | 0.136 | 0.016 | 0.016 | 0.015 | 0.042      |
| E6  | 0.015 | 0.014 | 0.075 | 0.100 | 0.075 | 0.015 | 0.016 | 0.013 | 0.014 | 0.015 | 0.014 | 0.016 | 0.016 | 0.015 | 0.027      |
| E7  | 0.075 | 0.014 | 0.015 | 0.014 | 0.015 | 0.015 | 0.016 | 0.013 | 0.014 | 0.015 | 0.014 | 0.016 | 0.016 | 0.015 | 0.015      |
| E8  | 0.015 | 0.014 | 0.015 | 0.014 | 0.015 | 0.015 | 0.016 | 0.013 | 0.014 | 0.015 | 0.014 | 0.016 | 0.016 | 0.015 | 0.013      |
| E9  | 0.015 | 0.014 | 0.015 | 0.014 | 0.015 | 0.015 | 0.016 | 0.013 | 0.014 | 0.015 | 0.014 | 0.016 | 0.016 | 0.015 | 0.014      |
| E10 | 0.015 | 0.014 | 0.015 | 0.014 | 0.015 | 0.015 | 0.016 | 0.013 | 0.014 | 0.015 | 0.014 | 0.016 | 0.016 | 0.015 | 0.015      |
| E11 | 0.015 | 0.014 | 0.015 | 0.014 | 0.015 | 0.015 | 0.016 | 0.013 | 0.014 | 0.015 | 0.014 | 0.016 | 0.016 | 0.015 | 0.015      |
| E12 | 0.015 | 0.014 | 0.015 | 0.014 | 0.015 | 0.015 | 0.016 | 0.013 | 0.014 | 0.015 | 0.014 | 0.016 | 0.016 | 0.015 | 0.016      |
| E13 | 0.015 | 0.014 | 0.015 | 0.014 | 0.015 | 0.015 | 0.016 | 0.013 | 0.014 | 0.015 | 0.014 | 0.016 | 0.016 | 0.015 | 0.021      |
| E14 | 0.015 | 0.014 | 0.015 | 0.014 | 0.015 | 0.015 | 0.016 | 0.013 | 0.014 | 0.015 | 0.014 | 0.016 | 0.016 | 0.015 | 0.013      |
| E15 | 0.015 | 0.014 | 0.015 | 0.014 | 0.015 | 0.015 | 0.016 | 0.013 | 0.014 | 0.015 | 0.014 | 0.016 | 0.016 | 0.015 | 0.013      |
| E16 | 0.015 | 0.014 | 0.015 | 0.014 | 0.015 | 0.015 | 0.016 | 0.013 | 0.014 | 0.015 | 0.014 | 0.016 | 0.016 | 0.015 | 0.013      |
| E17 | 0.015 | 0.014 | 0.015 | 0.014 | 0.015 | 0.015 | 0.016 | 0.013 | 0.014 | 0.015 | 0.014 | 0.016 | 0.016 | 0.015 | 0.016      |
| E18 | 0.015 | 0.014 | 0.015 | 0.014 | 0.015 | 0.015 | 0.016 | 0.013 | 0.014 | 0.015 | 0.014 | 0.016 | 0.016 | 0.015 | 0.016      |
| E19 | 0.015 | 0.014 | 0.015 | 0.014 | 0.015 | 0.015 | 0.016 | 0.013 | 0.014 | 0.015 | 0.014 | 0.016 | 0.016 | 0.015 | 0.017      |
| E20 | 0.015 | 0.014 | 0.015 | 0.014 | 0.015 | 0.015 | 0.016 | 0.013 | 0.014 | 0.015 | 0.014 | 0.016 | 0.016 | 0.015 | 0.016      |
| E21 | 0.015 | 0.014 | 0.015 | 0.014 | 0.015 | 0.015 | 0.016 | 0.013 | 0.014 | 0.015 | 0.014 | 0.016 | 0.016 | 0.015 | 0.014      |
| E22 | 0.015 | 0.014 | 0.015 | 0.014 | 0.015 | 0.015 | 0.016 | 0.013 | 0.014 | 0.043 | 0.014 | 0.016 | 0.016 | 0.015 | 0.024      |
| E23 | 0.015 | 0.014 | 0.015 | 0.014 | 0.015 | 0.015 | 0.016 | 0.013 | 0.014 | 0.015 | 0.014 | 0.016 | 0.016 | 0.015 | 0.028      |

|     | E41   | E42   | E43   | E44   | E45   | E46   | E47   | E48   | E49   | E50   | E51   | E52   | E53   | E54   | Priorities |
|-----|-------|-------|-------|-------|-------|-------|-------|-------|-------|-------|-------|-------|-------|-------|------------|
| E24 | 0.015 | 0.014 | 0.015 | 0.014 | 0.015 | 0.015 | 0.016 | 0.013 | 0.014 | 0.015 | 0.014 | 0.016 | 0.016 | 0.015 | 0.014      |
| E25 | 0.015 | 0.014 | 0.015 | 0.014 | 0.015 | 0.015 | 0.016 | 0.013 | 0.014 | 0.015 | 0.014 | 0.016 | 0.016 | 0.015 | 0.016      |
| E26 | 0.015 | 0.014 | 0.015 | 0.014 | 0.015 | 0.015 | 0.016 | 0.013 | 0.014 | 0.015 | 0.014 | 0.016 | 0.016 | 0.015 | 0.022      |
| E27 | 0.015 | 0.014 | 0.015 | 0.014 | 0.015 | 0.015 | 0.016 | 0.013 | 0.014 | 0.015 | 0.014 | 0.016 | 0.016 | 0.015 | 0.013      |
| E28 | 0.015 | 0.014 | 0.015 | 0.014 | 0.015 | 0.015 | 0.016 | 0.013 | 0.014 | 0.015 | 0.014 | 0.016 | 0.016 | 0.015 | 0.013      |
| E29 | 0.015 | 0.014 | 0.015 | 0.014 | 0.015 | 0.015 | 0.016 | 0.013 | 0.014 | 0.015 | 0.014 | 0.016 | 0.016 | 0.015 | 0.014      |
| E30 | 0.015 | 0.014 | 0.015 | 0.014 | 0.015 | 0.015 | 0.016 | 0.039 | 0.014 | 0.015 | 0.014 | 0.016 | 0.016 | 0.015 | 0.014      |
| E31 | 0.015 | 0.014 | 0.015 | 0.014 | 0.015 | 0.015 | 0.016 | 0.013 | 0.014 | 0.015 | 0.014 | 0.016 | 0.016 | 0.015 | 0.014      |
| E32 | 0.015 | 0.014 | 0.015 | 0.014 | 0.015 | 0.015 | 0.016 | 0.013 | 0.014 | 0.015 | 0.014 | 0.016 | 0.016 | 0.015 | 0.016      |
| E33 | 0.015 | 0.014 | 0.015 | 0.014 | 0.015 | 0.015 | 0.016 | 0.013 | 0.014 | 0.015 | 0.014 | 0.016 | 0.016 | 0.015 | 0.014      |
| E34 | 0.015 | 0.014 | 0.015 | 0.014 | 0.015 | 0.015 | 0.016 | 0.013 | 0.014 | 0.015 | 0.014 | 0.016 | 0.016 | 0.015 | 0.026      |
| E35 | 0.015 | 0.014 | 0.015 | 0.014 | 0.015 | 0.015 | 0.016 | 0.013 | 0.014 | 0.015 | 0.014 | 0.016 | 0.016 | 0.015 | 0.013      |
| E36 | 0.015 | 0.014 | 0.015 | 0.014 | 0.015 | 0.015 | 0.016 | 0.013 | 0.014 | 0.015 | 0.014 | 0.016 | 0.016 | 0.015 | 0.013      |
| E37 | 0.015 | 0.014 | 0.015 | 0.014 | 0.015 | 0.015 | 0.016 | 0.013 | 0.014 | 0.015 | 0.014 | 0.016 | 0.016 | 0.015 | 0.016      |
| E38 | 0.015 | 0.014 | 0.015 | 0.014 | 0.015 | 0.015 | 0.016 | 0.013 | 0.014 | 0.015 | 0.014 | 0.016 | 0.016 | 0.015 | 0.017      |
| E39 | 0.015 | 0.014 | 0.015 | 0.014 | 0.015 | 0.015 | 0.016 | 0.013 | 0.014 | 0.015 | 0.014 | 0.016 | 0.016 | 0.015 | 0.013      |
| E40 | 0.015 | 0.014 | 0.015 | 0.014 | 0.015 | 0.015 | 0.016 | 0.013 | 0.014 | 0.015 | 0.014 | 0.016 | 0.016 | 0.015 | 0.014      |
| E41 | 0.015 | 0.014 | 0.015 | 0.014 | 0.015 | 0.015 | 0.016 | 0.013 | 0.014 | 0.015 | 0.014 | 0.016 | 0.016 | 0.015 | 0.016      |
| E42 | 0.015 | 0.014 | 0.015 | 0.014 | 0.015 | 0.015 | 0.016 | 0.039 | 0.014 | 0.015 | 0.014 | 0.016 | 0.016 | 0.015 | 0.020      |
| E43 | 0.015 | 0.014 | 0.015 | 0.042 | 0.015 | 0.015 | 0.016 | 0.013 | 0.014 | 0.015 | 0.014 | 0.016 | 0.016 | 0.015 | 0.021      |
| E44 | 0.015 | 0.042 | 0.015 | 0.014 | 0.015 | 0.043 | 0.016 | 0.013 | 0.042 | 0.015 | 0.070 | 0.016 | 0.016 | 0.015 | 0.032      |
| E45 | 0.015 | 0.014 | 0.015 | 0.014 | 0.015 | 0.015 | 0.016 | 0.013 | 0.014 | 0.015 | 0.014 | 0.016 | 0.016 | 0.015 | 0.013      |
| E46 | 0.015 | 0.014 | 0.015 | 0.014 | 0.015 | 0.015 | 0.016 | 0.013 | 0.014 | 0.073 | 0.014 | 0.016 | 0.016 | 0.015 | 0.017      |
| E47 | 0.015 | 0.014 | 0.015 | 0.014 | 0.015 | 0.073 | 0.016 | 0.068 | 0.014 | 0.015 | 0.070 | 0.016 | 0.016 | 0.015 | 0.017      |
| E48 | 0.015 | 0.014 | 0.015 | 0.014 | 0.015 | 0.015 | 0.016 | 0.013 | 0.042 | 0.015 | 0.014 | 0.016 | 0.016 | 0.015 | 0.014      |
| E49 | 0.140 | 0.014 | 0.015 | 0.014 | 0.015 | 0.015 | 0.016 | 0.013 | 0.014 | 0.015 | 0.014 | 0.016 | 0.016 | 0.015 | 0.017      |
| E50 | 0.015 | 0.134 | 0.015 | 0.014 | 0.015 | 0.015 | 0.016 | 0.013 | 0.014 | 0.015 | 0.014 | 0.016 | 0.016 | 0.015 | 0.015      |
| E51 | 0.015 | 0.014 | 0.140 | 0.134 | 0.140 | 0.015 | 0.016 | 0.013 | 0.014 | 0.015 | 0.014 | 0.016 | 0.016 | 0.015 | 0.023      |
| E52 | 0.015 | 0.014 | 0.015 | 0.014 | 0.015 | 0.015 | 0.016 | 0.013 | 0.042 | 0.015 | 0.014 | 0.016 | 0.016 | 0.142 | 0.017      |
| E53 | 0.015 | 0.014 | 0.015 | 0.014 | 0.015 | 0.015 | 0.016 | 0.013 | 0.042 | 0.015 | 0.014 | 0.016 | 0.016 | 0.045 | 0.016      |
| E54 | 0.015 | 0.014 | 0.015 | 0.014 | 0.015 | 0.015 | 0.016 | 0.068 | 0.014 | 0.015 | 0.014 | 0.144 | 0.144 | 0.015 | 0.027      |

Table S25. Case 8. Original Weighted Supermatrix and Priorities.

|     | E1    | E2    | E3    | E4    | E5    | E6    | E7    | E8    | E9    | E10   | E11   | E12   | E13   | E14   | Priorities |
|-----|-------|-------|-------|-------|-------|-------|-------|-------|-------|-------|-------|-------|-------|-------|------------|
| E1  | 0.000 | 0.000 | 0.000 | 0.000 | 0.000 | 0.000 | 0.000 | 0.142 | 0.132 | 0.579 | 0.000 | 0.000 | 0.000 | 0.000 | 0.012      |
| E2  | 0.000 | 0.000 | 0.000 | 0.000 | 0.000 | 0.000 | 0.000 | 0.000 | 0.011 | 0.130 | 0.000 | 0.070 | 0.000 | 0.000 | 0.025      |
| E3  | 0.000 | 0.000 | 0.000 | 0.239 | 0.068 | 0.023 | 0.018 | 0.017 | 0.024 | 0.041 | 0.112 | 0.211 | 0.133 | 0.066 | 0.114      |
| E4  | 0.000 | 0.000 | 0.000 | 0.000 | 0.068 | 0.114 | 0.126 | 0.048 | 0.024 | 0.000 | 0.112 | 0.000 | 0.133 | 0.199 | 0.060      |
| E5  | 0.000 | 0.000 | 0.000 | 0.000 | 0.000 | 0.541 | 0.143 | 0.000 | 0.029 | 0.000 | 0.020 | 0.000 | 0.000 | 0.000 | 0.040      |
| E6  | 0.000 | 0.000 | 0.000 | 0.000 | 0.451 | 0.000 | 0.428 | 0.000 | 0.039 | 0.000 | 0.060 | 0.000 | 0.000 | 0.000 | 0.052      |
| E7  | 0.000 | 0.000 | 0.282 | 0.214 | 0.090 | 0.000 | 0.000 | 0.082 | 0.007 | 0.000 | 0.000 | 0.000 | 0.095 | 0.095 | 0.066      |
| E8  | 0.000 | 0.000 | 0.000 | 0.000 | 0.006 | 0.038 | 0.000 | 0.000 | 0.076 | 0.000 | 0.000 | 0.000 | 0.000 | 0.000 | 0.004      |
| E9  | 0.000 | 0.000 | 0.000 | 0.000 | 0.045 | 0.013 | 0.000 | 0.000 | 0.000 | 0.000 | 0.158 | 0.000 | 0.000 | 0.000 | 0.016      |
| E10 | 0.083 | 0.083 | 0.000 | 0.000 | 0.000 | 0.000 | 0.000 | 0.000 | 0.000 | 0.000 | 0.000 | 0.042 | 0.000 | 0.000 | 0.017      |
| E11 | 0.059 | 0.060 | 0.140 | 0.143 | 0.017 | 0.111 | 0.060 | 0.229 | 0.076 | 0.015 | 0.538 | 0.000 | 0.000 | 0.000 | 0.085      |
| E12 | 0.523 | 0.542 | 0.385 | 0.309 | 0.017 | 0.016 | 0.184 | 0.397 | 0.344 | 0.141 | 0.000 | 0.677 | 0.000 | 0.000 | 0.327      |
| E13 | 0.221 | 0.148 | 0.128 | 0.030 | 0.119 | 0.063 | 0.028 | 0.039 | 0.065 | 0.015 | 0.000 | 0.000 | 0.320 | 0.000 | 0.050      |
| E14 | 0.113 | 0.166 | 0.067 | 0.064 | 0.119 | 0.081 | 0.015 | 0.047 | 0.172 | 0.080 | 0.000 | 0.000 | 0.320 | 0.639 | 0.131      |

Table S26. Case 8's X Influence Matrix.

|     | E1 | E2 | E3 | E4 | E5 | E6 | E7 | E8 | E9 | E10 | E11 | E12 | E13 | E14 |
|-----|----|----|----|----|----|----|----|----|----|-----|-----|-----|-----|-----|
| E1  | 0  | 0  | 0  | 0  | 0  | 0  | 0  | 1  | 1  | 4   | 0   | 0   | 0   | 0   |
| E2  | 0  | 0  | 0  | 0  | 0  | 0  | 0  | 0  | 0  | 1   | 0   | 0   | 0   | 0   |
| E3  | 0  | 0  | 0  | 3  | 0  | 0  | 0  | 0  | 0  | 0   | 1   | 1   | 2   | 0   |
| E4  | 0  | 0  | 0  | 0  | 0  | 1  | 1  | 0  | 0  | 0   | 1   | 0   | 2   | 1   |
| E5  | 0  | 0  | 0  | 0  | 0  | 4  | 1  | 0  | 0  | 0   | 0   | 0   | 0   | 0   |
| E6  | 0  | 0  | 0  | 0  | 4  | 0  | 4  | 0  | 0  | 0   | 0   | 0   | 0   | 0   |
| E7  | 0  | 0  | 3  | 3  | 1  | 0  | 0  | 1  | 0  | 0   | 0   | 0   | 1   | 0   |
| E8  | 0  | 0  | 0  | 0  | 0  | 0  | 0  | 0  | 1  | 0   | 0   | 0   | 0   | 0   |
| E9  | 0  | 0  | 0  | 0  | 0  | 0  | 0  | 0  | 0  | 0   | 1   | 0   | 0   | 0   |
| E10 | 0  | 0  | 0  | 0  | 0  | 0  | 0  | 0  | 0  | 0   | 0   | 0   | 0   | 0   |
| E11 | 0  | 0  | 1  | 2  | 0  | 1  | 0  | 2  | 1  | 0   | 4   | 0   | 0   | 0   |
| E12 | 4  | 4  | 4  | 4  | 0  | 0  | 2  | 4  | 4  | 1   | 0   | 4   | 0   | 0   |
| E13 | 2  | 1  | 1  | 0  | 1  | 0  | 0  | 0  | 0  | 0   | 0   | 0   | 4   | 0   |
| E14 | 1  | 1  | 0  | 1  | 1  | 0  | 0  | 0  | 2  | 0   | 0   | 0   | 4   | 4   |

Table S27. Case 8. Weighted Supermatrix and Priorities, according to procedure 1.

|     | E1    | E2    | E3    | E4    | E5    | E6    | E7    | E8    | E9    | E10   | E11   | E12   | E13   | E14   | Priorities |
|-----|-------|-------|-------|-------|-------|-------|-------|-------|-------|-------|-------|-------|-------|-------|------------|
| E1  | 0.000 | 0.000 | 0.000 | 0.000 | 0.000 | 0.000 | 0.000 | 0.076 | 0.071 | 0.778 | 0.000 | 0.000 | 0.000 | 0.000 | 0.000      |
| E2  | 0.000 | 0.000 | 0.000 | 0.000 | 0.000 | 0.000 | 0.000 | 0.000 | 0.000 | 0.111 | 0.000 | 0.000 | 0.000 | 0.000 | 0.000      |
| E3  | 0.000 | 0.000 | 0.000 | 0.201 | 0.000 | 0.000 | 0.000 | 0.000 | 0.000 | 0.000 | 0.100 | 0.125 | 0.091 | 0.000 | 0.084      |
| E4  | 0.000 | 0.000 | 0.000 | 0.000 | 0.000 | 0.111 | 0.076 | 0.000 | 0.000 | 0.000 | 0.100 | 0.000 | 0.091 | 0.125 | 0.028      |
| E5  | 0.000 | 0.000 | 0.000 | 0.000 | 0.000 | 0.778 | 0.076 | 0.000 | 0.000 | 0.000 | 0.000 | 0.000 | 0.000 | 0.000 | 0.045      |
| E6  | 0.000 | 0.000 | 0.000 | 0.000 | 0.700 | 0.000 | 0.657 | 0.000 | 0.000 | 0.000 | 0.000 | 0.000 | 0.000 | 0.000 | 0.054      |
| E7  | 0.000 | 0.000 | 0.282 | 0.201 | 0.100 | 0.000 | 0.000 | 0.076 | 0.000 | 0.000 | 0.000 | 0.000 | 0.042 | 0.000 | 0.035      |
| E8  | 0.000 | 0.000 | 0.000 | 0.000 | 0.000 | 0.000 | 0.000 | 0.000 | 0.071 | 0.000 | 0.000 | 0.000 | 0.000 | 0.000 | 0.000      |
| E9  | 0.000 | 0.000 | 0.000 | 0.000 | 0.000 | 0.000 | 0.000 | 0.000 | 0.000 | 0.000 | 0.100 | 0.000 | 0.000 | 0.000 | 0.005      |
| E10 | 0.000 | 0.000 | 0.000 | 0.000 | 0.000 | 0.000 | 0.000 | 0.000 | 0.000 | 0.000 | 0.000 | 0.000 | 0.000 | 0.000 | 0.000      |
| E11 | 0.000 | 0.000 | 0.067 | 0.086 | 0.000 | 0.111 | 0.000 | 0.191 | 0.071 | 0.000 | 0.700 | 0.000 | 0.000 | 0.000 | 0.048      |
| E12 | 0.731 | 0.778 | 0.583 | 0.469 | 0.000 | 0.000 | 0.191 | 0.657 | 0.598 | 0.111 | 0.000 | 0.875 | 0.000 | 0.000 | 0.579      |
| E13 | 0.188 | 0.111 | 0.067 | 0.000 | 0.100 | 0.000 | 0.000 | 0.000 | 0.000 | 0.000 | 0.000 | 0.000 | 0.388 | 0.000 | 0.017      |
| E14 | 0.081 | 0.111 | 0.000 | 0.043 | 0.100 | 0.000 | 0.000 | 0.000 | 0.187 | 0.000 | 0.000 | 0.000 | 0.388 | 0.875 | 0.105      |

Table S28. Case 8. Weighted Supermatrix and Priorities, according to procedure 2.

|     | E1    | E2    | E3    | E4    | E5    | E6    | E7    | E8    | E9    | E10   | E11   | E12   | E13   | E14   | Priorities |
|-----|-------|-------|-------|-------|-------|-------|-------|-------|-------|-------|-------|-------|-------|-------|------------|
| E1  | 0.034 | 0.037 | 0.029 | 0.023 | 0.033 | 0.037 | 0.031 | 0.085 | 0.078 | 0.389 | 0.033 | 0.041 | 0.023 | 0.041 | 0.050      |
| E2  | 0.034 | 0.037 | 0.029 | 0.023 | 0.033 | 0.037 | 0.031 | 0.031 | 0.028 | 0.104 | 0.033 | 0.041 | 0.023 | 0.041 | 0.036      |
| E3  | 0.034 | 0.037 | 0.029 | 0.173 | 0.033 | 0.037 | 0.031 | 0.031 | 0.028 | 0.037 | 0.095 | 0.116 | 0.105 | 0.041 | 0.070      |
| E4  | 0.034 | 0.037 | 0.029 | 0.023 | 0.033 | 0.104 | 0.085 | 0.031 | 0.028 | 0.037 | 0.095 | 0.041 | 0.105 | 0.116 | 0.061      |
| E5  | 0.034 | 0.037 | 0.029 | 0.023 | 0.033 | 0.389 | 0.085 | 0.031 | 0.028 | 0.037 | 0.033 | 0.041 | 0.023 | 0.041 | 0.065      |
| E6  | 0.034 | 0.037 | 0.029 | 0.023 | 0.381 | 0.037 | 0.362 | 0.031 | 0.028 | 0.037 | 0.033 | 0.041 | 0.023 | 0.041 | 0.078      |
| E7  | 0.034 | 0.037 | 0.222 | 0.173 | 0.095 | 0.037 | 0.031 | 0.085 | 0.028 | 0.037 | 0.033 | 0.041 | 0.057 | 0.041 | 0.065      |
| E8  | 0.034 | 0.037 | 0.029 | 0.023 | 0.033 | 0.037 | 0.031 | 0.031 | 0.078 | 0.037 | 0.033 | 0.041 | 0.023 | 0.041 | 0.036      |
| E9  | 0.034 | 0.037 | 0.029 | 0.023 | 0.033 | 0.037 | 0.031 | 0.031 | 0.028 | 0.037 | 0.095 | 0.041 | 0.023 | 0.041 | 0.039      |
| E10 | 0.034 | 0.037 | 0.029 | 0.023 | 0.033 | 0.037 | 0.031 | 0.031 | 0.028 | 0.037 | 0.033 | 0.041 | 0.023 | 0.041 | 0.034      |
| E11 | 0.034 | 0.037 | 0.079 | 0.103 | 0.033 | 0.104 | 0.031 | 0.161 | 0.078 | 0.037 | 0.381 | 0.041 | 0.023 | 0.041 | 0.083      |
| E12 | 0.368 | 0.389 | 0.332 | 0.287 | 0.033 | 0.037 | 0.161 | 0.362 | 0.356 | 0.104 | 0.033 | 0.398 | 0.023 | 0.041 | 0.212      |
| E13 | 0.168 | 0.104 | 0.079 | 0.023 | 0.095 | 0.037 | 0.031 | 0.031 | 0.028 | 0.037 | 0.033 | 0.041 | 0.265 | 0.041 | 0.067      |
| E14 | 0.093 | 0.104 | 0.029 | 0.057 | 0.095 | 0.037 | 0.031 | 0.031 | 0.155 | 0.037 | 0.033 | 0.041 | 0.265 | 0.398 | 0.104      |

Table S29. Case 9. Original Weighted Supermatrix and Priorities.

|     | E1    | E2    | E3    | E4    | E5    | E6    | E7    | E8    | E9    | E10   | E11   | E12   | E13   | E14   | E15   | E16   | Priorities |
|-----|-------|-------|-------|-------|-------|-------|-------|-------|-------|-------|-------|-------|-------|-------|-------|-------|------------|
| E1  | 0.000 | 0.177 | 0.052 | 0.331 | 0.241 | 0.000 | 0.000 | 0.000 | 0.000 | 0.000 | 0.000 | 0.000 | 0.000 | 0.000 | 0.000 | 0.000 | 0.064      |
| E2  | 0.067 | 0.000 | 0.066 | 0.047 | 0.063 | 0.000 | 0.000 | 0.000 | 0.000 | 0.000 | 0.000 | 0.000 | 0.000 | 0.000 | 0.000 | 0.000 | 0.017      |
| E3  | 0.093 | 0.067 | 0.000 | 0.068 | 0.096 | 0.000 | 0.000 | 0.000 | 0.000 | 0.000 | 0.000 | 0.000 | 0.000 | 0.000 | 0.000 | 0.000 | 0.024      |
| E4  | 0.268 | 0.689 | 0.671 | 0.000 | 0.600 | 0.000 | 0.000 | 0.000 | 0.000 | 0.000 | 0.000 | 0.000 | 0.000 | 0.000 | 0.000 | 0.000 | 0.106      |
| E5  | 0.572 | 0.067 | 0.211 | 0.554 | 0.000 | 0.000 | 0.000 | 0.000 | 0.000 | 0.000 | 0.000 | 0.000 | 0.000 | 0.000 | 0.000 | 0.000 | 0.101      |
| E6  | 0.000 | 0.000 | 0.000 | 0.000 | 0.000 | 0.000 | 0.273 | 0.250 | 0.544 | 0.613 | 0.000 | 0.000 | 0.000 | 0.000 | 0.000 | 0.000 | 0.090      |
| E7  | 0.000 | 0.000 | 0.000 | 0.000 | 0.000 | 0.467 | 0.000 | 0.250 | 0.269 | 0.059 | 0.000 | 0.000 | 0.000 | 0.000 | 0.000 | 0.000 | 0.075      |
| E8  | 0.000 | 0.000 | 0.000 | 0.000 | 0.000 | 0.277 | 0.064 | 0.000 | 0.106 | 0.109 | 0.000 | 0.000 | 0.000 | 0.000 | 0.000 | 0.000 | 0.041      |
| E9  | 0.000 | 0.000 | 0.000 | 0.000 | 0.000 | 0.160 | 0.599 | 0.250 | 0.000 | 0.219 | 0.000 | 0.000 | 0.000 | 0.000 | 0.000 | 0.000 | 0.076      |
| E10 | 0.000 | 0.000 | 0.000 | 0.000 | 0.000 | 0.096 | 0.064 | 0.250 | 0.081 | 0.000 | 0.000 | 0.000 | 0.000 | 0.000 | 0.000 | 0.000 | 0.030      |
| E11 | 0.000 | 0.000 | 0.000 | 0.000 | 0.000 | 0.000 | 0.000 | 0.000 | 0.000 | 0.000 | 0.000 | 0.250 | 0.333 | 0.000 | 0.000 | 0.000 | 0.043      |
| E12 | 0.000 | 0.000 | 0.000 | 0.000 | 0.000 | 0.000 | 0.000 | 0.000 | 0.000 | 0.000 | 0.333 | 0.000 | 0.667 | 0.000 | 0.000 | 0.000 | 0.066      |
| E13 | 0.000 | 0.000 | 0.000 | 0.000 | 0.000 | 0.000 | 0.000 | 0.000 | 0.000 | 0.000 | 0.667 | 0.750 | 0.000 | 0.000 | 0.000 | 0.000 | 0.078      |
| E14 | 0.000 | 0.000 | 0.000 | 0.000 | 0.000 | 0.000 | 0.000 | 0.000 | 0.000 | 0.000 | 0.000 | 0.000 | 0.000 | 0.000 | 0.500 | 0.750 | 0.075      |
| E15 | 0.000 | 0.000 | 0.000 | 0.000 | 0.000 | 0.000 | 0.000 | 0.000 | 0.000 | 0.000 | 0.000 | 0.000 | 0.000 | 0.200 | 0.000 | 0.250 | 0.034      |
| E16 | 0.000 | 0.000 | 0.000 | 0.000 | 0.000 | 0.000 | 0.000 | 0.000 | 0.000 | 0.000 | 0.000 | 0.000 | 0.000 | 0.800 | 0.500 | 0.000 | 0.078      |

Table S30. Case 9's X Influence Matrix.

[illegible]

Table S31. Case 9. Weighted Supermatrix and Priorities, according to procedure 1.

|     | E1    | E2    | E3    | E4    | E5    | E6    | E7    | E8    | E9    | E10   | E11   | E12   | E13   | E14   | E15   | E16   | Priorities |
|-----|-------|-------|-------|-------|-------|-------|-------|-------|-------|-------|-------|-------|-------|-------|-------|-------|------------|
| E1  | 0.000 | 0.125 | 0.000 | 0.167 | 0.167 | 0.000 | 0.000 | 0.000 | 0.000 | 0.000 | 0.000 | 0.000 | 0.000 | 0.000 | 0.000 | 0.000 | 0.045      |
| E2  | 0.000 | 0.000 | 0.000 | 0.000 | 0.000 | 0.000 | 0.000 | 0.000 | 0.000 | 0.000 | 0.000 | 0.000 | 0.000 | 0.000 | 0.000 | 0.000 | 0.000      |
| E3  | 0.000 | 0.000 | 0.000 | 0.000 | 0.000 | 0.000 | 0.000 | 0.000 | 0.000 | 0.000 | 0.000 | 0.000 | 0.000 | 0.000 | 0.000 | 0.000 | 0.000      |
| E4  | 0.167 | 0.875 | 0.875 | 0.000 | 0.833 | 0.000 | 0.000 | 0.000 | 0.000 | 0.000 | 0.000 | 0.000 | 0.000 | 0.000 | 0.000 | 0.000 | 0.126      |
| E5  | 0.833 | 0.000 | 0.125 | 0.833 | 0.000 | 0.000 | 0.000 | 0.000 | 0.000 | 0.000 | 0.000 | 0.000 | 0.000 | 0.000 | 0.000 | 0.000 | 0.142      |
| E6  | 0.000 | 0.000 | 0.000 | 0.000 | 0.000 | 0.000 | 0.167 | 0.250 | 0.833 | 0.875 | 0.000 | 0.000 | 0.000 | 0.000 | 0.000 | 0.000 | 0.104      |
| E7  | 0.000 | 0.000 | 0.000 | 0.000 | 0.000 | 0.657 | 0.000 | 0.250 | 0.167 | 0.000 | 0.000 | 0.000 | 0.000 | 0.000 | 0.000 | 0.000 | 0.088      |
| E8  | 0.000 | 0.000 | 0.000 | 0.000 | 0.000 | 0.191 | 0.000 | 0.000 | 0.000 | 0.000 | 0.000 | 0.000 | 0.000 | 0.000 | 0.000 | 0.000 | 0.020      |
| E9  | 0.000 | 0.000 | 0.000 | 0.000 | 0.000 | 0.076 | 0.833 | 0.250 | 0.000 | 0.125 | 0.000 | 0.000 | 0.000 | 0.000 | 0.000 | 0.000 | 0.088      |
| E10 | 0.000 | 0.000 | 0.000 | 0.000 | 0.000 | 0.076 | 0.000 | 0.250 | 0.000 | 0.000 | 0.000 | 0.000 | 0.000 | 0.000 | 0.000 | 0.000 | 0.013      |
| E11 | 0.000 | 0.000 | 0.000 | 0.000 | 0.000 | 0.000 | 0.000 | 0.000 | 0.000 | 0.000 | 0.000 | 0.125 | 0.167 | 0.000 | 0.000 | 0.000 | 0.024      |
| E12 | 0.000 | 0.000 | 0.000 | 0.000 | 0.000 | 0.000 | 0.000 | 0.000 | 0.000 | 0.000 | 0.167 | 0.000 | 0.833 | 0.000 | 0.000 | 0.000 | 0.076      |
| E13 | 0.000 | 0.000 | 0.000 | 0.000 | 0.000 | 0.000 | 0.000 | 0.000 | 0.000 | 0.000 | 0.833 | 0.875 | 0.000 | 0.000 | 0.000 | 0.000 | 0.087      |
| E14 | 0.000 | 0.000 | 0.000 | 0.000 | 0.000 | 0.000 | 0.000 | 0.000 | 0.000 | 0.000 | 0.000 | 0.000 | 0.000 | 0.000 | 0.500 | 0.875 | 0.083      |
| E15 | 0.000 | 0.000 | 0.000 | 0.000 | 0.000 | 0.000 | 0.000 | 0.000 | 0.000 | 0.000 | 0.000 | 0.000 | 0.000 | 0.125 | 0.000 | 0.125 | 0.021      |
| E16 | 0.000 | 0.000 | 0.000 | 0.000 | 0.000 | 0.000 | 0.000 | 0.000 | 0.000 | 0.000 | 0.000 | 0.000 | 0.000 | 0.875 | 0.500 | 0.000 | 0.083      |

Table S32. Case 9. Weighted Supermatrix and Priorities, according to procedure 2.

|     | E1    | E2    | E3    | E4    | E5    | E6    | E7    | E8    | E9    | E10   | E11   | E12   | E13   | E14   | E15   | E16   | Priorities |
|-----|-------|-------|-------|-------|-------|-------|-------|-------|-------|-------|-------|-------|-------|-------|-------|-------|------------|
| E1  | 0.035 | 0.108 | 0.038 | 0.166 | 0.166 | 0.029 | 0.035 | 0.021 | 0.035 | 0.038 | 0.035 | 0.038 | 0.035 | 0.038 | 0.031 | 0.038 | 0.060      |
| E2  | 0.035 | 0.038 | 0.038 | 0.035 | 0.035 | 0.029 | 0.035 | 0.021 | 0.035 | 0.038 | 0.035 | 0.038 | 0.035 | 0.038 | 0.031 | 0.038 | 0.034      |
| E3  | 0.035 | 0.038 | 0.038 | 0.035 | 0.035 | 0.029 | 0.035 | 0.021 | 0.035 | 0.038 | 0.035 | 0.038 | 0.035 | 0.038 | 0.031 | 0.038 | 0.034      |
| E4  | 0.166 | 0.365 | 0.365 | 0.035 | 0.346 | 0.029 | 0.035 | 0.021 | 0.035 | 0.038 | 0.035 | 0.038 | 0.035 | 0.038 | 0.031 | 0.038 | 0.091      |
| E5  | 0.346 | 0.038 | 0.108 | 0.346 | 0.035 | 0.029 | 0.035 | 0.021 | 0.035 | 0.038 | 0.035 | 0.038 | 0.035 | 0.038 | 0.031 | 0.038 | 0.084      |
| E6  | 0.035 | 0.038 | 0.038 | 0.035 | 0.035 | 0.029 | 0.166 | 0.188 | 0.346 | 0.365 | 0.035 | 0.038 | 0.035 | 0.038 | 0.031 | 0.038 | 0.091      |
| E7  | 0.035 | 0.038 | 0.038 | 0.035 | 0.035 | 0.334 | 0.035 | 0.188 | 0.166 | 0.038 | 0.035 | 0.038 | 0.035 | 0.038 | 0.031 | 0.038 | 0.080      |
| E8  | 0.035 | 0.038 | 0.038 | 0.035 | 0.035 | 0.152 | 0.035 | 0.021 | 0.035 | 0.038 | 0.035 | 0.038 | 0.035 | 0.038 | 0.031 | 0.038 | 0.046      |
| E9  | 0.035 | 0.038 | 0.038 | 0.035 | 0.035 | 0.081 | 0.346 | 0.188 | 0.035 | 0.108 | 0.035 | 0.038 | 0.035 | 0.038 | 0.031 | 0.038 | 0.075      |
| E10 | 0.035 | 0.038 | 0.038 | 0.035 | 0.035 | 0.081 | 0.035 | 0.188 | 0.035 | 0.038 | 0.035 | 0.038 | 0.035 | 0.038 | 0.031 | 0.038 | 0.047      |
| E11 | 0.035 | 0.038 | 0.038 | 0.035 | 0.035 | 0.029 | 0.035 | 0.021 | 0.035 | 0.038 | 0.035 | 0.108 | 0.166 | 0.038 | 0.031 | 0.038 | 0.048      |
| E12 | 0.035 | 0.038 | 0.038 | 0.035 | 0.035 | 0.029 | 0.035 | 0.021 | 0.035 | 0.038 | 0.166 | 0.038 | 0.346 | 0.038 | 0.031 | 0.038 | 0.062      |
| E13 | 0.035 | 0.038 | 0.038 | 0.035 | 0.035 | 0.029 | 0.035 | 0.021 | 0.035 | 0.038 | 0.346 | 0.365 | 0.035 | 0.038 | 0.031 | 0.038 | 0.070      |
| E14 | 0.035 | 0.038 | 0.038 | 0.035 | 0.035 | 0.029 | 0.035 | 0.021 | 0.035 | 0.038 | 0.035 | 0.038 | 0.035 | 0.038 | 0.281 | 0.365 | 0.067      |
| E15 | 0.035 | 0.038 | 0.038 | 0.035 | 0.035 | 0.029 | 0.035 | 0.021 | 0.035 | 0.038 | 0.035 | 0.038 | 0.035 | 0.108 | 0.031 | 0.108 | 0.044      |
| E16 | 0.035 | 0.038 | 0.038 | 0.035 | 0.035 | 0.029 | 0.035 | 0.021 | 0.035 | 0.038 | 0.035 | 0.038 | 0.035 | 0.365 | 0.281 | 0.038 | 0.067      |



Table S33. Case 10. Original Weighted Supermatrix and Priorities.

|    | E1    | E2    | E3    | E4    | E5    | E6    | Priorities |
|----|-------|-------|-------|-------|-------|-------|------------|
| E1 | 0.000 | 0.000 | 0.000 | 0.054 | 0.066 | 0.065 | 0.032      |
| E2 | 0.000 | 0.000 | 0.000 | 0.213 | 0.735 | 0.734 | 0.346      |
| E3 | 0.000 | 0.000 | 0.000 | 0.734 | 0.199 | 0.201 | 0.122      |
| E4 | 0.062 | 0.055 | 0.650 | 0.000 | 0.000 | 0.000 | 0.040      |
| E5 | 0.353 | 0.188 | 0.287 | 0.000 | 0.000 | 0.000 | 0.161      |
| E6 | 0.585 | 0.757 | 0.063 | 0.000 | 0.000 | 0.000 | 0.299      |

Table S34. Case 10's X Influence Matrix.

|    | E1 | E2 | E3 | E4 | E5 | E6 |
|----|----|----|----|----|----|----|
| E1 | 0  | 0  | 0  | 0  | 0  | 0  |
| E2 | 0  | 0  | 0  | 1  | 4  | 4  |
| E3 | 0  | 0  | 0  | 4  | 1  | 1  |
| E4 | 0  | 0  | 4  | 0  | 0  | 0  |
| E5 | 3  | 1  | 2  | 0  | 0  | 0  |
| E6 | 4  | 4  | 0  | 0  | 0  | 0  |

Table S35. Case 10. Weighted Supermatrix and Priorities, according to procedure 1.

|    | E1    | E2    | E3    | E4    | E5    | E6    | Priorities |
|----|-------|-------|-------|-------|-------|-------|------------|
| E1 | 0.000 | 0.000 | 0.000 | 0.000 | 0.000 | 0.000 | 0.000      |
| E2 | 0.000 | 0.000 | 0.000 | 0.125 | 0.875 | 0.875 | 0.333      |
| E3 | 0.000 | 0.000 | 0.000 | 0.875 | 0.125 | 0.125 | 0.167      |
| E4 | 0.000 | 0.000 | 0.833 | 0.000 | 0.000 | 0.000 | 0.139      |
| E5 | 0.250 | 0.125 | 0.167 | 0.000 | 0.000 | 0.000 | 0.069      |
| E6 | 0.750 | 0.875 | 0.000 | 0.000 | 0.000 | 0.000 | 0.292      |

Table S36. Case 10. Weighted Supermatrix and Priorities, according to procedure 2.

|    | E1    | E2    | E3    | E4    | E5    | E6    | Priorities |
|----|-------|-------|-------|-------|-------|-------|------------|
| E1 | 0.048 | 0.057 | 0.051 | 0.057 | 0.057 | 0.057 | 0.056      |
| E2 | 0.048 | 0.057 | 0.051 | 0.153 | 0.617 | 0.617 | 0.270      |
| E3 | 0.048 | 0.057 | 0.051 | 0.617 | 0.153 | 0.153 | 0.171      |
| E4 | 0.048 | 0.057 | 0.575 | 0.057 | 0.057 | 0.057 | 0.146      |
| E5 | 0.296 | 0.153 | 0.222 | 0.057 | 0.057 | 0.057 | 0.125      |
| E6 | 0.513 | 0.617 | 0.051 | 0.057 | 0.057 | 0.057 | 0.233      |

Table S37. Case 11. Original Weighted Supermatrix and Priorities.

|     | E1    | E2    | E3    | E4    | E5    | E6    | E7    | E8    | E9    | E10   | E11   | E12   | E13   | E14   | E15   | E16   | E17   | E18   | E19   | Priorities |
|-----|-------|-------|-------|-------|-------|-------|-------|-------|-------|-------|-------|-------|-------|-------|-------|-------|-------|-------|-------|------------|
| E1  | 0.158 | 0.000 | 0.000 | 0.000 | 0.000 | 0.000 | 0.022 | 0.078 | 0.012 | 0.110 | 0.030 | 0.029 | 0.100 | 0.085 | 0.017 | 0.172 | 0.186 | 0.101 | 0.040 | 0.075      |
| E2  | 0.000 | 0.158 | 0.000 | 0.000 | 0.000 | 0.000 | 0.065 | 0.073 | 0.140 | 0.028 | 0.030 | 0.052 | 0.055 | 0.165 | 0.031 | 0.016 | 0.008 | 0.101 | 0.010 | 0.044      |
| E3  | 0.000 | 0.000 | 0.158 | 0.000 | 0.000 | 0.000 | 0.152 | 0.082 | 0.140 | 0.031 | 0.309 | 0.111 | 0.104 | 0.014 | 0.085 | 0.016 | 0.041 | 0.101 | 0.235 | 0.071      |
| E4  | 0.000 | 0.000 | 0.000 | 0.158 | 0.000 | 0.000 | 0.011 | 0.062 | 0.015 | 0.069 | 0.031 | 0.020 | 0.094 | 0.086 | 0.073 | 0.112 | 0.124 | 0.011 | 0.015 | 0.040      |
| E5  | 0.000 | 0.000 | 0.000 | 0.000 | 0.158 | 0.000 | 0.072 | 0.169 | 0.053 | 0.042 | 0.031 | 0.011 | 0.105 | 0.073 | 0.094 | 0.167 | 0.124 | 0.087 | 0.165 | 0.081      |
| E6  | 0.000 | 0.000 | 0.000 | 0.000 | 0.000 | 0.158 | 0.178 | 0.037 | 0.140 | 0.054 | 0.068 | 0.111 | 0.042 | 0.076 | 0.033 | 0.016 | 0.015 | 0.101 | 0.036 | 0.051      |
| E7  | 0.031 | 0.031 | 0.031 | 0.031 | 0.031 | 0.031 | 0.500 | 0.000 | 0.000 | 0.000 | 0.000 | 0.000 | 0.000 | 0.000 | 0.000 | 0.000 | 0.000 | 0.000 | 0.000 | 0.022      |
| E8  | 0.007 | 0.007 | 0.007 | 0.007 | 0.007 | 0.007 | 0.000 | 0.500 | 0.000 | 0.000 | 0.000 | 0.000 | 0.000 | 0.000 | 0.000 | 0.000 | 0.000 | 0.000 | 0.000 | 0.005      |
| E9  | 0.043 | 0.043 | 0.043 | 0.043 | 0.043 | 0.043 | 0.000 | 0.000 | 0.500 | 0.000 | 0.000 | 0.000 | 0.000 | 0.000 | 0.000 | 0.000 | 0.000 | 0.000 | 0.000 | 0.031      |
| E10 | 0.025 | 0.025 | 0.025 | 0.025 | 0.025 | 0.025 | 0.000 | 0.000 | 0.000 | 0.333 | 0.000 | 0.000 | 0.000 | 0.000 | 0.333 | 0.000 | 0.000 | 0.000 | 0.000 | 0.023      |
| E11 | 0.026 | 0.026 | 0.026 | 0.026 | 0.026 | 0.026 | 0.000 | 0.000 | 0.000 | 0.000 | 0.500 | 0.000 | 0.000 | 0.000 | 0.000 | 0.000 | 0.000 | 0.000 | 0.000 | 0.019      |
| E12 | 0.079 | 0.079 | 0.079 | 0.079 | 0.079 | 0.079 | 0.000 | 0.000 | 0.000 | 0.000 | 0.000 | 0.333 | 0.000 | 0.000 | 0.000 | 0.000 | 0.000 | 0.000 | 0.000 | 0.043      |
| E13 | 0.033 | 0.033 | 0.033 | 0.033 | 0.033 | 0.033 | 0.000 | 0.000 | 0.000 | 0.000 | 0.000 | 0.000 | 0.500 | 0.000 | 0.000 | 0.000 | 0.000 | 0.000 | 0.000 | 0.024      |
| E14 | 0.033 | 0.033 | 0.033 | 0.033 | 0.033 | 0.033 | 0.000 | 0.000 | 0.000 | 0.000 | 0.000 | 0.000 | 0.000 | 0.500 | 0.000 | 0.000 | 0.000 | 0.000 | 0.000 | 0.024      |
| E15 | 0.015 | 0.015 | 0.015 | 0.015 | 0.015 | 0.015 | 0.000 | 0.000 | 0.000 | 0.333 | 0.000 | 0.000 | 0.000 | 0.000 | 0.333 | 0.000 | 0.000 | 0.000 | 0.000 | 0.020      |
| E16 | 0.234 | 0.234 | 0.234 | 0.234 | 0.234 | 0.234 | 0.000 | 0.000 | 0.000 | 0.000 | 0.000 | 0.000 | 0.000 | 0.000 | 0.000 | 0.500 | 0.000 | 0.000 | 0.000 | 0.169      |
| E17 | 0.020 | 0.020 | 0.020 | 0.020 | 0.020 | 0.020 | 0.000 | 0.000 | 0.000 | 0.000 | 0.000 | 0.000 | 0.000 | 0.000 | 0.000 | 0.000 | 0.500 | 0.000 | 0.000 | 0.014      |
| E18 | 0.212 | 0.212 | 0.212 | 0.212 | 0.212 | 0.212 | 0.000 | 0.000 | 0.000 | 0.000 | 0.000 | 0.333 | 0.000 | 0.000 | 0.000 | 0.000 | 0.000 | 0.500 | 0.000 | 0.182      |
| E19 | 0.084 | 0.084 | 0.084 | 0.084 | 0.084 | 0.084 | 0.000 | 0.000 | 0.000 | 0.000 | 0.000 | 0.000 | 0.000 | 0.000 | 0.000 | 0.000 | 0.000 | 0.000 | 0.500 | 0.061      |

Table S38. Case 11's X Influence Matrix.

|     | E1 | E2 | E3 | E4 | E5 | E6 | E7 | E8 | E9 | E10 | E11 | E12 | E13 | E14 | E15 | E16 | E17 | E18 | E19 |
|-----|----|----|----|----|----|----|----|----|----|-----|-----|-----|-----|-----|-----|-----|-----|-----|-----|
| E1  | 3  | 0  | 0  | 0  | 0  | 0  | 0  | 0  | 0  | 1   | 0   | 0   | 1   | 0   | 0   | 1   | 1   | 1   | 0   |
| E2  | 0  | 3  | 0  | 0  | 0  | 0  | 0  | 0  | 1  | 0   | 0   | 0   | 0   | 1   | 0   | 0   | 0   | 1   | 0   |
| E3  | 0  | 0  | 3  | 0  | 0  | 0  | 1  | 0  | 1  | 0   | 3   | 1   | 1   | 0   | 1   | 0   | 0   | 1   | 2   |
| E4  | 0  | 0  | 0  | 3  | 0  | 0  | 0  | 0  | 0  | 1   | 0   | 0   | 0   | 0   | 1   | 1   | 1   | 0   | 0   |
| E5  | 0  | 0  | 0  | 0  | 3  | 0  | 0  | 1  | 0  | 0   | 0   | 0   | 1   | 0   | 1   | 1   | 1   | 0   | 1   |
| E6  | 0  | 0  | 0  | 0  | 0  | 3  | 1  | 0  | 1  | 0   | 0   | 1   | 0   | 0   | 0   | 0   | 0   | 1   | 0   |
| E7  | 0  | 0  | 0  | 0  | 0  | 0  | 4  | 0  | 0  | 0   | 0   | 0   | 0   | 0   | 0   | 0   | 0   | 0   | 0   |
| E8  | 0  | 0  | 0  | 0  | 0  | 0  | 0  | 4  | 0  | 0   | 0   | 0   | 0   | 0   | 0   | 0   | 0   | 0   | 0   |
| E9  | 0  | 0  | 0  | 0  | 0  | 0  | 0  | 0  | 4  | 0   | 0   | 0   | 0   | 0   | 0   | 0   | 0   | 0   | 0   |
| E10 | 0  | 0  | 0  | 0  | 0  | 0  | 0  | 0  | 0  | 4   | 0   | 0   | 0   | 0   | 4   | 0   | 0   | 0   | 0   |
| E11 | 0  | 0  | 0  | 0  | 0  | 0  | 0  | 0  | 0  | 0   | 4   | 0   | 0   | 0   | 0   | 0   | 0   | 0   | 0   |
| E12 | 1  | 1  | 1  | 1  | 1  | 1  | 0  | 0  | 0  | 0   | 0   | 4   | 0   | 0   | 0   | 0   | 0   | 0   | 0   |
| E13 | 0  | 0  | 0  | 0  | 0  | 0  | 0  | 0  | 0  | 0   | 0   | 0   | 4   | 0   | 0   | 0   | 0   | 0   | 0   |
| E14 | 0  | 0  | 0  | 0  | 0  | 0  | 0  | 0  | 0  | 0   | 0   | 0   | 0   | 4   | 0   | 0   | 0   | 0   | 0   |
| E15 | 0  | 0  | 0  | 0  | 0  | 0  | 0  | 0  | 0  | 4   | 0   | 0   | 0   | 0   | 4   | 0   | 0   | 0   | 0   |
| E16 | 4  | 4  | 4  | 4  | 4  | 4  | 0  | 0  | 0  | 0   | 0   | 0   | 0   | 0   | 0   | 4   | 0   | 0   | 0   |
| E17 | 0  | 0  | 0  | 0  | 0  | 0  | 0  | 0  | 0  | 0   | 0   | 0   | 0   | 0   | 0   | 0   | 4   | 0   | 0   |
| E18 | 4  | 4  | 4  | 4  | 4  | 4  | 0  | 0  | 0  | 0   | 0   | 4   | 0   | 0   | 0   | 0   | 0   | 4   | 0   |
| E19 | 1  | 1  | 1  | 1  | 1  | 1  | 0  | 0  | 0  | 0   | 0   | 0   | 0   | 0   | 0   | 0   | 0   | 0   | 4   |

Table S39. Case 11. Weighted Supermatrix and Priorities, according to procedure 1.

|     | E1    | E2    | E3    | E4    | E5    | E6    | E7    | E8    | E9    | E10   | E11   | E12   | E13   | E14   | E15   | E16   | E17   | E18   | E19   | Priorities |
|-----|-------|-------|-------|-------|-------|-------|-------|-------|-------|-------|-------|-------|-------|-------|-------|-------|-------|-------|-------|------------|
| E1  | 0.170 | 0.000 | 0.000 | 0.000 | 0.000 | 0.000 | 0.000 | 0.000 | 0.000 | 0.063 | 0.000 | 0.000 | 0.100 | 0.000 | 0.000 | 0.100 | 0.100 | 0.091 | 0.000 | 0.075      |
| E2  | 0.000 | 0.170 | 0.000 | 0.000 | 0.000 | 0.000 | 0.000 | 0.000 | 0.100 | 0.000 | 0.000 | 0.000 | 0.000 | 0.125 | 0.000 | 0.000 | 0.000 | 0.091 | 0.000 | 0.034      |
| E3  | 0.000 | 0.000 | 0.170 | 0.000 | 0.000 | 0.000 | 0.111 | 0.000 | 0.100 | 0.000 | 0.250 | 0.063 | 0.100 | 0.000 | 0.059 | 0.000 | 0.000 | 0.091 | 0.188 | 0.046      |
| E4  | 0.000 | 0.000 | 0.000 | 0.170 | 0.000 | 0.000 | 0.000 | 0.000 | 0.000 | 0.063 | 0.000 | 0.000 | 0.000 | 0.000 | 0.059 | 0.100 | 0.100 | 0.000 | 0.000 | 0.041      |
| E5  | 0.000 | 0.000 | 0.000 | 0.000 | 0.170 | 0.000 | 0.000 | 0.125 | 0.000 | 0.000 | 0.000 | 0.000 | 0.100 | 0.000 | 0.059 | 0.100 | 0.100 | 0.000 | 0.081 | 0.046      |
| E6  | 0.000 | 0.000 | 0.000 | 0.000 | 0.000 | 0.170 | 0.111 | 0.000 | 0.100 | 0.000 | 0.000 | 0.063 | 0.000 | 0.000 | 0.000 | 0.000 | 0.000 | 0.091 | 0.000 | 0.036      |
| E7  | 0.000 | 0.000 | 0.000 | 0.000 | 0.000 | 0.000 | 0.778 | 0.000 | 0.000 | 0.000 | 0.000 | 0.000 | 0.000 | 0.000 | 0.000 | 0.000 | 0.000 | 0.000 | 0.000 | 0.000      |
| E8  | 0.000 | 0.000 | 0.000 | 0.000 | 0.000 | 0.000 | 0.000 | 0.875 | 0.000 | 0.000 | 0.000 | 0.000 | 0.000 | 0.000 | 0.000 | 0.000 | 0.000 | 0.000 | 0.000 | 0.000      |
| E9  | 0.000 | 0.000 | 0.000 | 0.000 | 0.000 | 0.000 | 0.000 | 0.000 | 0.700 | 0.000 | 0.000 | 0.000 | 0.000 | 0.000 | 0.000 | 0.000 | 0.000 | 0.000 | 0.000 | 0.000      |
| E10 | 0.000 | 0.000 | 0.000 | 0.000 | 0.000 | 0.000 | 0.000 | 0.000 | 0.000 | 0.438 | 0.000 | 0.000 | 0.000 | 0.000 | 0.412 | 0.000 | 0.000 | 0.000 | 0.000 | 0.000      |
| E11 | 0.000 | 0.000 | 0.000 | 0.000 | 0.000 | 0.000 | 0.000 | 0.000 | 0.000 | 0.000 | 0.750 | 0.000 | 0.000 | 0.000 | 0.000 | 0.000 | 0.000 | 0.000 | 0.000 | 0.000      |
| E12 | 0.045 | 0.045 | 0.045 | 0.045 | 0.045 | 0.045 | 0.000 | 0.000 | 0.000 | 0.000 | 0.000 | 0.438 | 0.000 | 0.000 | 0.000 | 0.000 | 0.000 | 0.000 | 0.000 | 0.022      |
| E13 | 0.000 | 0.000 | 0.000 | 0.000 | 0.000 | 0.000 | 0.000 | 0.000 | 0.000 | 0.000 | 0.000 | 0.000 | 0.700 | 0.000 | 0.000 | 0.000 | 0.000 | 0.000 | 0.000 | 0.000      |
| E14 | 0.000 | 0.000 | 0.000 | 0.000 | 0.000 | 0.000 | 0.000 | 0.000 | 0.000 | 0.000 | 0.000 | 0.000 | 0.000 | 0.875 | 0.000 | 0.000 | 0.000 | 0.000 | 0.000 | 0.000      |
| E15 | 0.000 | 0.000 | 0.000 | 0.000 | 0.000 | 0.000 | 0.000 | 0.000 | 0.000 | 0.438 | 0.000 | 0.000 | 0.000 | 0.000 | 0.412 | 0.000 | 0.000 | 0.000 | 0.000 | 0.000      |
| E16 | 0.370 | 0.370 | 0.370 | 0.370 | 0.370 | 0.370 | 0.000 | 0.000 | 0.000 | 0.000 | 0.000 | 0.000 | 0.000 | 0.000 | 0.000 | 0.700 | 0.000 | 0.000 | 0.000 | 0.343      |
| E17 | 0.000 | 0.000 | 0.000 | 0.000 | 0.000 | 0.000 | 0.000 | 0.000 | 0.000 | 0.000 | 0.000 | 0.000 | 0.000 | 0.000 | 0.000 | 0.000 | 0.700 | 0.000 | 0.000 | 0.000      |
| E18 | 0.370 | 0.370 | 0.370 | 0.370 | 0.370 | 0.370 | 0.000 | 0.000 | 0.000 | 0.000 | 0.000 | 0.438 | 0.000 | 0.000 | 0.000 | 0.000 | 0.000 | 0.636 | 0.000 | 0.310      |
| E19 | 0.045 | 0.045 | 0.045 | 0.045 | 0.045 | 0.045 | 0.000 | 0.000 | 0.000 | 0.000 | 0.000 | 0.000 | 0.000 | 0.000 | 0.000 | 0.000 | 0.000 | 0.000 | 0.731 | 0.047      |

Table S40. Case 11. Weighted Supermatrix and Priorities, according to procedure 2.

|     | E1    | E2    | E3    | E4    | E5    | E6    | E7    | E8    | E9    | E10   | E11   | E12   | E13   | E14   | E15   | E16   | E17   | E18   | E19   | Priorities |
|-----|-------|-------|-------|-------|-------|-------|-------|-------|-------|-------|-------|-------|-------|-------|-------|-------|-------|-------|-------|------------|
| E1  | 0.150 | 0.021 | 0.021 | 0.021 | 0.021 | 0.021 | 0.031 | 0.034 | 0.029 | 0.068 | 0.030 | 0.024 | 0.084 | 0.034 | 0.023 | 0.084 | 0.084 | 0.078 | 0.029 | 0.052      |
| E2  | 0.021 | 0.150 | 0.021 | 0.021 | 0.021 | 0.021 | 0.031 | 0.034 | 0.084 | 0.024 | 0.030 | 0.024 | 0.029 | 0.098 | 0.023 | 0.029 | 0.029 | 0.078 | 0.029 | 0.043      |
| E3  | 0.021 | 0.021 | 0.150 | 0.021 | 0.021 | 0.021 | 0.091 | 0.034 | 0.084 | 0.024 | 0.203 | 0.068 | 0.084 | 0.034 | 0.064 | 0.029 | 0.029 | 0.078 | 0.146 | 0.063      |
| E4  | 0.021 | 0.021 | 0.021 | 0.150 | 0.021 | 0.021 | 0.031 | 0.034 | 0.029 | 0.068 | 0.030 | 0.024 | 0.029 | 0.034 | 0.064 | 0.084 | 0.084 | 0.027 | 0.029 | 0.044      |
| E5  | 0.021 | 0.021 | 0.021 | 0.021 | 0.150 | 0.021 | 0.031 | 0.098 | 0.029 | 0.024 | 0.030 | 0.024 | 0.084 | 0.034 | 0.064 | 0.084 | 0.084 | 0.027 | 0.082 | 0.050      |
| E6  | 0.021 | 0.021 | 0.021 | 0.021 | 0.021 | 0.150 | 0.091 | 0.034 | 0.084 | 0.024 | 0.030 | 0.068 | 0.029 | 0.034 | 0.023 | 0.029 | 0.029 | 0.078 | 0.029 | 0.045      |
| E7  | 0.021 | 0.021 | 0.021 | 0.021 | 0.021 | 0.021 | 0.319 | 0.034 | 0.029 | 0.024 | 0.030 | 0.024 | 0.029 | 0.034 | 0.023 | 0.029 | 0.029 | 0.027 | 0.029 | 0.037      |
| E8  | 0.021 | 0.021 | 0.021 | 0.021 | 0.021 | 0.021 | 0.031 | 0.326 | 0.029 | 0.024 | 0.030 | 0.024 | 0.029 | 0.034 | 0.023 | 0.029 | 0.029 | 0.027 | 0.029 | 0.037      |
| E9  | 0.021 | 0.021 | 0.021 | 0.021 | 0.021 | 0.021 | 0.031 | 0.034 | 0.314 | 0.024 | 0.030 | 0.024 | 0.029 | 0.034 | 0.023 | 0.029 | 0.029 | 0.027 | 0.029 | 0.036      |
| E10 | 0.021 | 0.021 | 0.021 | 0.021 | 0.021 | 0.021 | 0.031 | 0.034 | 0.029 | 0.248 | 0.030 | 0.024 | 0.029 | 0.034 | 0.245 | 0.029 | 0.029 | 0.027 | 0.029 | 0.047      |
| E11 | 0.021 | 0.021 | 0.021 | 0.021 | 0.021 | 0.021 | 0.031 | 0.034 | 0.029 | 0.024 | 0.288 | 0.024 | 0.029 | 0.034 | 0.023 | 0.029 | 0.029 | 0.027 | 0.029 | 0.035      |
| E12 | 0.056 | 0.056 | 0.056 | 0.056 | 0.056 | 0.056 | 0.031 | 0.034 | 0.029 | 0.024 | 0.030 | 0.248 | 0.029 | 0.034 | 0.023 | 0.029 | 0.029 | 0.027 | 0.029 | 0.047      |
| E13 | 0.021 | 0.021 | 0.021 | 0.021 | 0.021 | 0.021 | 0.031 | 0.034 | 0.029 | 0.024 | 0.030 | 0.024 | 0.314 | 0.034 | 0.023 | 0.029 | 0.029 | 0.027 | 0.029 | 0.036      |
| E14 | 0.021 | 0.021 | 0.021 | 0.021 | 0.021 | 0.021 | 0.031 | 0.034 | 0.029 | 0.024 | 0.030 | 0.024 | 0.029 | 0.326 | 0.023 | 0.029 | 0.029 | 0.027 | 0.029 | 0.037      |
| E15 | 0.021 | 0.021 | 0.021 | 0.021 | 0.021 | 0.021 | 0.031 | 0.034 | 0.029 | 0.248 | 0.030 | 0.024 | 0.029 | 0.034 | 0.245 | 0.029 | 0.029 | 0.027 | 0.029 | 0.047      |
| E16 | 0.223 | 0.223 | 0.223 | 0.223 | 0.223 | 0.223 | 0.031 | 0.034 | 0.029 | 0.024 | 0.030 | 0.024 | 0.029 | 0.034 | 0.023 | 0.314 | 0.029 | 0.027 | 0.029 | 0.121      |
| E17 | 0.021 | 0.021 | 0.021 | 0.021 | 0.021 | 0.021 | 0.031 | 0.034 | 0.029 | 0.024 | 0.030 | 0.024 | 0.029 | 0.034 | 0.023 | 0.029 | 0.314 | 0.027 | 0.029 | 0.036      |
| E18 | 0.223 | 0.223 | 0.223 | 0.223 | 0.223 | 0.223 | 0.031 | 0.034 | 0.029 | 0.024 | 0.030 | 0.248 | 0.029 | 0.034 | 0.023 | 0.029 | 0.029 | 0.309 | 0.029 | 0.135      |
| E19 | 0.056 | 0.056 | 0.056 | 0.056 | 0.056 | 0.056 | 0.031 | 0.034 | 0.029 | 0.024 | 0.030 | 0.024 | 0.029 | 0.034 | 0.023 | 0.029 | 0.029 | 0.027 | 0.304 | 0.050      |

Table S41. Case 12. Original Weighted Supermatrix and Priorities.

|    | E1    | E2    | E3    | E4    | E5    | E6    | Priorities |
|----|-------|-------|-------|-------|-------|-------|------------|
| E1 | 0.000 | 0.247 | 1.000 | 0.450 | 0.000 | 0.000 | 0.357      |
| E2 | 0.440 | 0.000 | 0.000 | 0.000 | 0.000 | 0.000 | 0.157      |
| E3 | 0.364 | 0.284 | 0.000 | 0.550 | 0.320 | 0.000 | 0.260      |
| E4 | 0.196 | 0.246 | 0.000 | 0.000 | 0.389 | 0.000 | 0.128      |
| E5 | 0.000 | 0.000 | 0.000 | 0.000 | 0.000 | 1.000 | 0.049      |
| E6 | 0.000 | 0.222 | 0.000 | 0.000 | 0.291 | 0.000 | 0.049      |

Table S42. Case 12's X Influence Matrix.

|    | E1 | E2 | E3 | E4 | E5 | E6 |
|----|----|----|----|----|----|----|
| E1 | 0  | 4  | 4  | 4  | 0  | 0  |
| E2 | 4  | 0  | 0  | 0  | 0  | 0  |
| E3 | 4  | 4  | 0  | 4  | 4  | 0  |
| E4 | 2  | 4  | 0  | 0  | 4  | 0  |
| E5 | 0  | 0  | 0  | 0  | 0  | 4  |
| E6 | 0  | 3  | 0  | 0  | 3  | 0  |

Table S43. Case 12. Weighted Supermatrix and Priorities, according to procedure 1.

|    | E1    | E2    | E3    | E4    | E5    | E6    | Priorities |
|----|-------|-------|-------|-------|-------|-------|------------|
| E1 | 0.000 | 0.300 | 1.000 | 0.500 | 0.000 | 0.000 | 0.392      |
| E2 | 0.455 | 0.000 | 0.000 | 0.000 | 0.000 | 0.000 | 0.178      |
| E3 | 0.455 | 0.300 | 0.000 | 0.500 | 0.429 | 0.000 | 0.290      |
| E4 | 0.091 | 0.300 | 0.000 | 0.000 | 0.429 | 0.000 | 0.098      |
| E5 | 0.000 | 0.000 | 0.000 | 0.000 | 0.000 | 1.000 | 0.021      |
| E6 | 0.000 | 0.100 | 0.000 | 0.000 | 0.143 | 0.000 | 0.021      |

Table S44. Case 12. Weighted Supermatrix and Priorities, according to procedure 2.

|    | E1    | E2    | E3    | E4    | E5    | E6    | Priorities |
|----|-------|-------|-------|-------|-------|-------|------------|
| E1 | 0.035 | 0.274 | 0.643 | 0.409 | 0.034 | 0.071 | 0.285      |
| E2 | 0.382 | 0.026 | 0.071 | 0.045 | 0.034 | 0.071 | 0.146      |
| E3 | 0.382 | 0.274 | 0.071 | 0.409 | 0.357 | 0.071 | 0.263      |
| E4 | 0.131 | 0.274 | 0.071 | 0.045 | 0.357 | 0.071 | 0.140      |
| E5 | 0.035 | 0.026 | 0.071 | 0.045 | 0.034 | 0.643 | 0.091      |
| E6 | 0.035 | 0.126 | 0.071 | 0.045 | 0.185 | 0.071 | 0.076      |

Table S45. Case 13. Original Weighted Supermatrix and Priorities.

|     | E1    | E2    | E3    | E4    | E5    | E6    | E7    | E8    | E9    | E10   | E11   | E12   | E13   | E14   | Priorities |
|-----|-------|-------|-------|-------|-------|-------|-------|-------|-------|-------|-------|-------|-------|-------|------------|
| E1  | 0.000 | 0.000 | 0.000 | 0.000 | 0.000 | 0.000 | 0.000 | 0.000 | 0.000 | 0.000 | 0.500 | 0.500 | 0.500 | 0.500 | 0.050      |
| E2  | 0.000 | 0.000 | 0.000 | 0.000 | 0.000 | 0.000 | 0.000 | 0.000 | 0.000 | 0.000 | 0.068 | 0.045 | 0.136 | 0.068 | 0.050      |
| E3  | 0.000 | 0.000 | 0.000 | 0.000 | 0.000 | 0.000 | 0.000 | 0.000 | 0.000 | 0.000 | 0.136 | 0.038 | 0.038 | 0.136 | 0.050      |
| E4  | 0.000 | 0.000 | 0.000 | 0.000 | 0.000 | 0.000 | 0.000 | 0.000 | 0.000 | 0.000 | 0.045 | 0.136 | 0.045 | 0.045 | 0.050      |
| E5  | 0.000 | 0.000 | 0.000 | 0.000 | 0.000 | 0.000 | 0.000 | 0.000 | 0.000 | 0.000 | 0.020 | 0.102 | 0.034 | 0.034 | 0.050      |
| E6  | 0.000 | 0.000 | 0.000 | 0.000 | 0.000 | 0.000 | 0.000 | 0.000 | 0.000 | 0.000 | 0.034 | 0.020 | 0.051 | 0.026 | 0.050      |
| E7  | 0.000 | 0.000 | 0.000 | 0.000 | 0.000 | 0.000 | 0.000 | 0.000 | 0.000 | 0.000 | 0.026 | 0.026 | 0.026 | 0.051 | 0.050      |
| E8  | 0.000 | 0.000 | 0.000 | 0.000 | 0.000 | 0.000 | 0.000 | 0.000 | 0.000 | 0.000 | 0.051 | 0.051 | 0.017 | 0.017 | 0.050      |
| E9  | 0.000 | 0.000 | 0.000 | 0.000 | 0.000 | 0.000 | 0.000 | 0.000 | 0.000 | 0.000 | 0.102 | 0.017 | 0.020 | 0.020 | 0.050      |
| E10 | 0.000 | 0.000 | 0.000 | 0.000 | 0.000 | 0.000 | 0.000 | 0.000 | 0.000 | 0.000 | 0.017 | 0.034 | 0.102 | 0.102 | 0.050      |
| E11 | 0.293 | 0.244 | 0.259 | 0.144 | 0.140 | 0.227 | 0.182 | 0.250 | 0.273 | 0.087 | 0.000 | 0.000 | 0.000 | 0.000 | 0.105      |
| E12 | 0.240 | 0.244 | 0.259 | 0.527 | 0.272 | 0.205 | 0.227 | 0.250 | 0.182 | 0.246 | 0.000 | 0.000 | 0.000 | 0.000 | 0.133      |
| E13 | 0.259 | 0.268 | 0.205 | 0.186 | 0.281 | 0.284 | 0.273 | 0.250 | 0.273 | 0.290 | 0.000 | 0.000 | 0.000 | 0.000 | 0.128      |
| E14 | 0.208 | 0.244 | 0.277 | 0.144 | 0.307 | 0.284 | 0.318 | 0.250 | 0.273 | 0.377 | 0.000 | 0.000 | 0.000 | 0.000 | 0.134      |

Table S46. Case 13's X Influence Matrix.

|     | E1 | E2 | E3 | E4 | E5 | E6 | E7 | E8 | E9 | E10 | E11 | E12 | E13 | E14 |
|-----|----|----|----|----|----|----|----|----|----|-----|-----|-----|-----|-----|
| E1  | 0  | 0  | 0  | 0  | 0  | 0  | 0  | 0  | 0  | 0   | 4   | 4   | 4   | 4   |
| E2  | 0  | 0  | 0  | 0  | 0  | 0  | 0  | 0  | 0  | 0   | 4   | 4   | 4   | 4   |
| E3  | 0  | 0  | 0  | 0  | 0  | 0  | 0  | 0  | 0  | 0   | 4   | 4   | 4   | 4   |
| E4  | 0  | 0  | 0  | 0  | 0  | 0  | 0  | 0  | 0  | 0   | 4   | 4   | 4   | 4   |
| E5  | 0  | 0  | 0  | 0  | 0  | 0  | 0  | 0  | 0  | 0   | 4   | 4   | 4   | 4   |
| E6  | 0  | 0  | 0  | 0  | 0  | 0  | 0  | 0  | 0  | 0   | 4   | 4   | 4   | 4   |
| E7  | 0  | 0  | 0  | 0  | 0  | 0  | 0  | 0  | 0  | 0   | 4   | 4   | 4   | 4   |
| E8  | 0  | 0  | 0  | 0  | 0  | 0  | 0  | 0  | 0  | 0   | 4   | 4   | 4   | 4   |
| E9  | 0  | 0  | 0  | 0  | 0  | 0  | 0  | 0  | 0  | 0   | 4   | 4   | 4   | 4   |
| E10 | 0  | 0  | 0  | 0  | 0  | 0  | 0  | 0  | 0  | 0   | 4   | 4   | 4   | 4   |
| E11 | 4  | 4  | 4  | 1  | 2  | 3  | 2  | 4  | 4  | 1   | 0   | 0   | 0   | 0   |
| E12 | 4  | 4  | 4  | 4  | 4  | 3  | 3  | 4  | 3  | 3   | 0   | 0   | 0   | 0   |
| E13 | 4  | 4  | 3  | 1  | 4  | 4  | 4  | 4  | 4  | 3   | 0   | 0   | 0   | 0   |
| E14 | 3  | 4  | 4  | 1  | 4  | 4  | 4  | 4  | 4  | 4   | 0   | 0   | 0   | 0   |

Table S47. Case 13. Weighted Supermatrix and Priorities, according to procedure 1.

|     | E1    | E2    | E3    | E4    | E5    | E6    | E7    | E8    | E9    | E10   | E11   | E12   | E13   | E14   | Priorities |
|-----|-------|-------|-------|-------|-------|-------|-------|-------|-------|-------|-------|-------|-------|-------|------------|
| E1  | 0.000 | 0.000 | 0.000 | 0.000 | 0.000 | 0.000 | 0.000 | 0.000 | 0.000 | 0.000 | 0.100 | 0.100 | 0.100 | 0.100 | 0.050      |
| E2  | 0.000 | 0.000 | 0.000 | 0.000 | 0.000 | 0.000 | 0.000 | 0.000 | 0.000 | 0.000 | 0.100 | 0.100 | 0.100 | 0.100 | 0.050      |
| E3  | 0.000 | 0.000 | 0.000 | 0.000 | 0.000 | 0.000 | 0.000 | 0.000 | 0.000 | 0.000 | 0.100 | 0.100 | 0.100 | 0.100 | 0.050      |
| E4  | 0.000 | 0.000 | 0.000 | 0.000 | 0.000 | 0.000 | 0.000 | 0.000 | 0.000 | 0.000 | 0.100 | 0.100 | 0.100 | 0.100 | 0.050      |
| E5  | 0.000 | 0.000 | 0.000 | 0.000 | 0.000 | 0.000 | 0.000 | 0.000 | 0.000 | 0.000 | 0.100 | 0.100 | 0.100 | 0.100 | 0.050      |
| E6  | 0.000 | 0.000 | 0.000 | 0.000 | 0.000 | 0.000 | 0.000 | 0.000 | 0.000 | 0.000 | 0.100 | 0.100 | 0.100 | 0.100 | 0.050      |
| E7  | 0.000 | 0.000 | 0.000 | 0.000 | 0.000 | 0.000 | 0.000 | 0.000 | 0.000 | 0.000 | 0.100 | 0.100 | 0.100 | 0.100 | 0.050      |
| E8  | 0.000 | 0.000 | 0.000 | 0.000 | 0.000 | 0.000 | 0.000 | 0.000 | 0.000 | 0.000 | 0.100 | 0.100 | 0.100 | 0.100 | 0.050      |
| E9  | 0.000 | 0.000 | 0.000 | 0.000 | 0.000 | 0.000 | 0.000 | 0.000 | 0.000 | 0.000 | 0.100 | 0.100 | 0.100 | 0.100 | 0.050      |
| E10 | 0.000 | 0.000 | 0.000 | 0.000 | 0.000 | 0.000 | 0.000 | 0.000 | 0.000 | 0.000 | 0.100 | 0.100 | 0.100 | 0.100 | 0.050      |
| E11 | 0.300 | 0.250 | 0.300 | 0.100 | 0.063 | 0.125 | 0.068 | 0.250 | 0.300 | 0.052 | 0.000 | 0.000 | 0.000 | 0.000 | 0.090      |
| E12 | 0.300 | 0.250 | 0.300 | 0.700 | 0.313 | 0.125 | 0.152 | 0.250 | 0.100 | 0.210 | 0.000 | 0.000 | 0.000 | 0.000 | 0.135      |
| E13 | 0.300 | 0.250 | 0.100 | 0.100 | 0.313 | 0.375 | 0.390 | 0.250 | 0.300 | 0.210 | 0.000 | 0.000 | 0.000 | 0.000 | 0.129      |
| E14 | 0.100 | 0.250 | 0.300 | 0.100 | 0.313 | 0.375 | 0.390 | 0.250 | 0.300 | 0.528 | 0.000 | 0.000 | 0.000 | 0.000 | 0.145      |

Table S48. Case 13. Weighted Supermatrix and Priorities, according to procedure 2.

|     | E1    | E2    | E3    | E4    | E5    | E6    | E7    | E8    | E9    | E10   | E11   | E12   | E13   | E14   | Priorities |
|-----|-------|-------|-------|-------|-------|-------|-------|-------|-------|-------|-------|-------|-------|-------|------------|
| E1  | 0.022 | 0.022 | 0.022 | 0.033 | 0.023 | 0.023 | 0.023 | 0.022 | 0.022 | 0.026 | 0.096 | 0.096 | 0.096 | 0.096 | 0.056      |
| E2  | 0.022 | 0.022 | 0.022 | 0.033 | 0.023 | 0.023 | 0.023 | 0.022 | 0.022 | 0.026 | 0.096 | 0.096 | 0.096 | 0.096 | 0.056      |
| E3  | 0.022 | 0.022 | 0.022 | 0.033 | 0.023 | 0.023 | 0.023 | 0.022 | 0.022 | 0.026 | 0.096 | 0.096 | 0.096 | 0.096 | 0.056      |
| E4  | 0.022 | 0.022 | 0.022 | 0.033 | 0.023 | 0.023 | 0.023 | 0.022 | 0.022 | 0.026 | 0.096 | 0.096 | 0.096 | 0.096 | 0.056      |
| E5  | 0.022 | 0.022 | 0.022 | 0.033 | 0.023 | 0.023 | 0.023 | 0.022 | 0.022 | 0.026 | 0.096 | 0.096 | 0.096 | 0.096 | 0.056      |
| E6  | 0.022 | 0.022 | 0.022 | 0.033 | 0.023 | 0.023 | 0.023 | 0.022 | 0.022 | 0.026 | 0.096 | 0.096 | 0.096 | 0.096 | 0.056      |
| E7  | 0.022 | 0.022 | 0.022 | 0.033 | 0.023 | 0.023 | 0.023 | 0.022 | 0.022 | 0.026 | 0.096 | 0.096 | 0.096 | 0.096 | 0.056      |
| E8  | 0.022 | 0.022 | 0.022 | 0.033 | 0.023 | 0.023 | 0.023 | 0.022 | 0.022 | 0.026 | 0.096 | 0.096 | 0.096 | 0.096 | 0.056      |
| E9  | 0.022 | 0.022 | 0.022 | 0.033 | 0.023 | 0.023 | 0.023 | 0.022 | 0.022 | 0.026 | 0.096 | 0.096 | 0.096 | 0.096 | 0.056      |
| E10 | 0.022 | 0.022 | 0.022 | 0.033 | 0.023 | 0.023 | 0.023 | 0.022 | 0.022 | 0.026 | 0.096 | 0.096 | 0.096 | 0.096 | 0.056      |
| E11 | 0.215 | 0.196 | 0.215 | 0.095 | 0.096 | 0.145 | 0.100 | 0.196 | 0.215 | 0.068 | 0.011 | 0.011 | 0.011 | 0.011 | 0.091      |
| E12 | 0.215 | 0.196 | 0.215 | 0.381 | 0.226 | 0.145 | 0.160 | 0.196 | 0.134 | 0.186 | 0.011 | 0.011 | 0.011 | 0.011 | 0.119      |
| E13 | 0.215 | 0.196 | 0.134 | 0.095 | 0.226 | 0.241 | 0.253 | 0.196 | 0.215 | 0.186 | 0.011 | 0.011 | 0.011 | 0.011 | 0.114      |
| E14 | 0.134 | 0.196 | 0.215 | 0.095 | 0.226 | 0.241 | 0.253 | 0.196 | 0.215 | 0.299 | 0.011 | 0.011 | 0.011 | 0.011 | 0.120      |

Table S49. Case 14. Original Weighted Supermatrix and Priorities.

|     | E1    | E2    | E3    | E4    | E5    | E6    | E7    | E8    | E9    | E10   | Priorities |
|-----|-------|-------|-------|-------|-------|-------|-------|-------|-------|-------|------------|
| E1  | 0.000 | 0.000 | 0.000 | 0.000 | 0.000 | 0.520 | 0.490 | 0.510 | 0.050 | 0.490 | 0.224      |
| E2  | 0.000 | 0.000 | 0.000 | 0.000 | 0.000 | 0.010 | 0.040 | 0.150 | 0.210 | 0.040 | 0.039      |
| E3  | 0.000 | 0.000 | 0.000 | 0.000 | 0.000 | 0.290 | 0.100 | 0.150 | 0.210 | 0.100 | 0.092      |
| E4  | 0.000 | 0.000 | 0.000 | 0.000 | 0.000 | 0.120 | 0.270 | 0.150 | 0.210 | 0.270 | 0.094      |
| E5  | 0.000 | 0.000 | 0.000 | 0.000 | 0.000 | 0.060 | 0.100 | 0.040 | 0.320 | 0.100 | 0.051      |
| E6  | 0.560 | 0.560 | 0.010 | 0.030 | 0.090 | 0.000 | 0.000 | 0.000 | 0.000 | 0.000 | 0.155      |
| E7  | 0.260 | 0.260 | 0.190 | 0.090 | 0.090 | 0.000 | 0.000 | 0.000 | 0.000 | 0.000 | 0.099      |
| E8  | 0.140 | 0.080 | 0.230 | 0.580 | 0.090 | 0.000 | 0.000 | 0.000 | 0.000 | 0.000 | 0.115      |
| E9  | 0.020 | 0.020 | 0.340 | 0.150 | 0.260 | 0.000 | 0.000 | 0.000 | 0.000 | 0.000 | 0.064      |
| E10 | 0.020 | 0.080 | 0.230 | 0.150 | 0.470 | 0.000 | 0.000 | 0.000 | 0.000 | 0.000 | 0.067      |

Table S50. Case 14's X Influence Matrix.

|     | E1 | E2 | E3 | E4 | E5 | E6 | E7 | E8 | E9 | E10 |
|-----|----|----|----|----|----|----|----|----|----|-----|
| E1  | 0  | 0  | 0  | 0  | 0  | 4  | 4  | 4  | 0  | 4   |
| E2  | 0  | 0  | 0  | 0  | 0  | 0  | 0  | 1  | 3  | 0   |
| E3  | 0  | 0  | 0  | 0  | 0  | 2  | 1  | 1  | 3  | 1   |
| E4  | 0  | 0  | 0  | 0  | 0  | 1  | 2  | 1  | 3  | 2   |
| E5  | 0  | 0  | 0  | 0  | 0  | 0  | 1  | 0  | 4  | 1   |
| E6  | 4  | 4  | 0  | 0  | 0  | 0  | 0  | 0  | 0  | 0   |
| E7  | 2  | 2  | 2  | 0  | 0  | 0  | 0  | 0  | 0  | 0   |
| E8  | 1  | 0  | 3  | 4  | 0  | 0  | 0  | 0  | 0  | 0   |
| E9  | 0  | 0  | 4  | 1  | 2  | 0  | 0  | 0  | 0  | 0   |
| E10 | 0  | 0  | 3  | 1  | 4  | 0  | 0  | 0  | 0  | 0   |

Table S51. Case 14. Weighted Supermatrix and Priorities, according to procedure 1.

|     | E1    | E2    | E3    | E4    | E5    | E6    | E7    | E8    | E9    | E10   | Priorities |
|-----|-------|-------|-------|-------|-------|-------|-------|-------|-------|-------|------------|
| E1  | 0.000 | 0.000 | 0.000 | 0.000 | 0.000 | 0.731 | 0.657 | 0.700 | 0.000 | 0.657 | 0.317      |
| E2  | 0.000 | 0.000 | 0.000 | 0.000 | 0.000 | 0.000 | 0.000 | 0.100 | 0.167 | 0.000 | 0.017      |
| E3  | 0.000 | 0.000 | 0.000 | 0.000 | 0.000 | 0.188 | 0.076 | 0.100 | 0.167 | 0.076 | 0.072      |
| E4  | 0.000 | 0.000 | 0.000 | 0.000 | 0.000 | 0.081 | 0.191 | 0.100 | 0.167 | 0.191 | 0.059      |
| E5  | 0.000 | 0.000 | 0.000 | 0.000 | 0.000 | 0.000 | 0.076 | 0.000 | 0.500 | 0.076 | 0.034      |
| E6  | 0.731 | 0.833 | 0.000 | 0.000 | 0.000 | 0.000 | 0.000 | 0.000 | 0.000 | 0.000 | 0.246      |
| E7  | 0.188 | 0.167 | 0.078 | 0.000 | 0.000 | 0.000 | 0.000 | 0.000 | 0.000 | 0.000 | 0.068      |
| E8  | 0.081 | 0.000 | 0.200 | 0.778 | 0.000 | 0.000 | 0.000 | 0.000 | 0.000 | 0.000 | 0.086      |
| E9  | 0.000 | 0.000 | 0.522 | 0.111 | 0.167 | 0.000 | 0.000 | 0.000 | 0.000 | 0.000 | 0.050      |
| E10 | 0.000 | 0.000 | 0.200 | 0.111 | 0.833 | 0.000 | 0.000 | 0.000 | 0.000 | 0.000 | 0.049      |

Table S52. Case 14. Weighted Supermatrix and Priorities, according to procedure 2.

|     | E1    | E2    | E3    | E4    | E5    | E6    | E7    | E8    | E9    | E10   | Priorities |
|-----|-------|-------|-------|-------|-------|-------|-------|-------|-------|-------|------------|
| E1  | 0.038 | 0.043 | 0.027 | 0.042 | 0.043 | 0.443 | 0.435 | 0.462 | 0.027 | 0.435 | 0.205      |
| E2  | 0.038 | 0.043 | 0.027 | 0.042 | 0.043 | 0.038 | 0.034 | 0.104 | 0.172 | 0.034 | 0.055      |
| E3  | 0.038 | 0.043 | 0.027 | 0.042 | 0.043 | 0.189 | 0.090 | 0.104 | 0.172 | 0.090 | 0.086      |
| E4  | 0.038 | 0.043 | 0.027 | 0.042 | 0.043 | 0.101 | 0.180 | 0.104 | 0.172 | 0.180 | 0.089      |
| E5  | 0.038 | 0.043 | 0.027 | 0.042 | 0.043 | 0.038 | 0.090 | 0.038 | 0.326 | 0.090 | 0.070      |
| E6  | 0.443 | 0.453 | 0.027 | 0.042 | 0.043 | 0.038 | 0.034 | 0.038 | 0.027 | 0.034 | 0.142      |
| E7  | 0.189 | 0.200 | 0.110 | 0.042 | 0.043 | 0.038 | 0.034 | 0.038 | 0.027 | 0.034 | 0.083      |
| E8  | 0.101 | 0.043 | 0.192 | 0.471 | 0.043 | 0.038 | 0.034 | 0.038 | 0.027 | 0.034 | 0.102      |
| E9  | 0.038 | 0.043 | 0.343 | 0.117 | 0.200 | 0.038 | 0.034 | 0.038 | 0.027 | 0.034 | 0.081      |
| E10 | 0.038 | 0.043 | 0.192 | 0.117 | 0.453 | 0.038 | 0.034 | 0.038 | 0.027 | 0.034 | 0.086      |

Table S53. Case 15. Original Weighted Supermatrix and Priorities.

|    | E1    | E2    | E3    | E4    | E5    | E6    | E7    | E8    | E9    | Priorities |
|----|-------|-------|-------|-------|-------|-------|-------|-------|-------|------------|
| E1 | 0.000 | 0.000 | 0.000 | 0.093 | 0.081 | 0.000 | 0.062 | 0.065 | 0.000 | 0.034      |
| E2 | 0.000 | 0.000 | 0.000 | 0.132 | 0.121 | 0.000 | 0.078 | 0.088 | 0.000 | 0.046      |
| E3 | 0.000 | 0.000 | 0.000 | 0.360 | 0.374 | 0.000 | 0.204 | 0.280 | 0.347 | 0.185      |
| E4 | 0.348 | 0.331 | 0.243 | 0.000 | 0.183 | 0.000 | 0.092 | 0.000 | 0.000 | 0.100      |
| E5 | 0.119 | 0.138 | 0.177 | 0.150 | 0.000 | 0.000 | 0.056 | 0.000 | 0.000 | 0.068      |
| E6 | 0.000 | 0.000 | 0.000 | 0.000 | 0.000 | 0.000 | 0.210 | 0.230 | 0.329 | 0.116      |
| E7 | 0.241 | 0.350 | 0.205 | 0.265 | 0.241 | 0.201 | 0.000 | 0.146 | 0.145 | 0.169      |
| E8 | 0.292 | 0.181 | 0.158 | 0.000 | 0.000 | 0.249 | 0.135 | 0.000 | 0.179 | 0.127      |
| E9 | 0.000 | 0.000 | 0.217 | 0.000 | 0.000 | 0.550 | 0.163 | 0.191 | 0.000 | 0.156      |

Table S54. Case 15's X Influence Matrix.

|    | E1 | E2 | E3 | E4 | E5 | E6 | E7 | E8 | E9 |
|----|----|----|----|----|----|----|----|----|----|
| E1 | 0  | 0  | 0  | 1  | 1  | 0  | 1  | 1  | 0  |
| E2 | 0  | 0  | 0  | 1  | 1  | 0  | 1  | 1  | 0  |
| E3 | 0  | 0  | 0  | 4  | 4  | 0  | 4  | 4  | 4  |
| E4 | 4  | 4  | 4  | 0  | 2  | 0  | 2  | 0  | 0  |
| E5 | 1  | 1  | 3  | 2  | 0  | 0  | 1  | 0  | 0  |
| E6 | 0  | 0  | 0  | 0  | 0  | 0  | 4  | 4  | 4  |
| E7 | 3  | 4  | 4  | 3  | 3  | 1  | 0  | 2  | 2  |
| E8 | 4  | 2  | 3  | 0  | 0  | 2  | 3  | 0  | 2  |
| E9 | 0  | 0  | 4  | 0  | 0  | 4  | 3  | 3  | 0  |



Table S55. Case 15. Weighted Supermatrix and Priorities, according to procedure 1.

|    | E1    | E2    | E3    | E4    | E5    | E6    | E7    | E8    | E9    | Priorities |
|----|-------|-------|-------|-------|-------|-------|-------|-------|-------|------------|
| E1 | 0.000 | 0.000 | 0.000 | 0.053 | 0.053 | 0.000 | 0.030 | 0.038 | 0.000 | 0.015      |
| E2 | 0.000 | 0.000 | 0.000 | 0.053 | 0.053 | 0.000 | 0.030 | 0.038 | 0.000 | 0.015      |
| E3 | 0.000 | 0.000 | 0.000 | 0.514 | 0.514 | 0.000 | 0.286 | 0.340 | 0.417 | 0.228      |
| E4 | 0.395 | 0.423 | 0.273 | 0.000 | 0.122 | 0.000 | 0.066 | 0.000 | 0.000 | 0.088      |
| E5 | 0.047 | 0.051 | 0.091 | 0.122 | 0.000 | 0.000 | 0.030 | 0.000 | 0.000 | 0.037      |
| E6 | 0.000 | 0.000 | 0.000 | 0.000 | 0.000 | 0.000 | 0.286 | 0.340 | 0.417 | 0.164      |
| E7 | 0.163 | 0.423 | 0.273 | 0.258 | 0.258 | 0.081 | 0.000 | 0.081 | 0.083 | 0.142      |
| E8 | 0.395 | 0.104 | 0.091 | 0.000 | 0.000 | 0.188 | 0.136 | 0.000 | 0.083 | 0.096      |
| E9 | 0.000 | 0.000 | 0.273 | 0.000 | 0.000 | 0.731 | 0.136 | 0.163 | 0.000 | 0.217      |

Table S56. Case 15. Weighted Supermatrix and Priorities, according to procedure 2.

|    | E1    | E2    | E3    | E4    | E5    | E6    | E7    | E8    | E9    | Priorities |
|----|-------|-------|-------|-------|-------|-------|-------|-------|-------|------------|
| E1 | 0.027 | 0.029 | 0.021 | 0.065 | 0.065 | 0.039 | 0.033 | 0.046 | 0.027 | 0.037      |
| E2 | 0.027 | 0.029 | 0.021 | 0.065 | 0.065 | 0.039 | 0.033 | 0.046 | 0.027 | 0.037      |
| E3 | 0.027 | 0.029 | 0.021 | 0.393 | 0.393 | 0.039 | 0.272 | 0.294 | 0.321 | 0.201      |
| E4 | 0.308 | 0.331 | 0.230 | 0.028 | 0.132 | 0.039 | 0.069 | 0.021 | 0.027 | 0.103      |
| E5 | 0.065 | 0.068 | 0.113 | 0.132 | 0.028 | 0.039 | 0.033 | 0.021 | 0.027 | 0.060      |
| E6 | 0.027 | 0.029 | 0.021 | 0.028 | 0.028 | 0.039 | 0.272 | 0.294 | 0.321 | 0.141      |
| E7 | 0.181 | 0.331 | 0.230 | 0.234 | 0.234 | 0.103 | 0.017 | 0.092 | 0.111 | 0.149      |
| E8 | 0.308 | 0.127 | 0.113 | 0.028 | 0.028 | 0.194 | 0.136 | 0.021 | 0.111 | 0.111      |
| E9 | 0.027 | 0.029 | 0.230 | 0.028 | 0.028 | 0.467 | 0.136 | 0.164 | 0.027 | 0.162      |

Table S57. Case 16. Original Weighted Supermatrix and Priorities.

|     | E1    | E2    | E3    | E4    | E5    | E6    | E7    | E8    | E9    | E10   | E11   | Priorities |
|-----|-------|-------|-------|-------|-------|-------|-------|-------|-------|-------|-------|------------|
| E1  | 0.000 | 0.000 | 0.000 | 0.000 | 0.000 | 0.000 | 0.450 | 0.450 | 0.450 | 0.438 | 0.450 | 0.179      |
| E2  | 0.000 | 0.000 | 0.000 | 0.000 | 0.000 | 0.000 | 0.050 | 0.050 | 0.050 | 0.063 | 0.050 | 0.021      |
| E3  | 0.000 | 0.000 | 0.000 | 0.389 | 0.045 | 0.056 | 0.231 | 0.231 | 0.231 | 0.231 | 0.231 | 0.142      |
| E4  | 0.000 | 0.000 | 0.389 | 0.000 | 0.045 | 0.056 | 0.115 | 0.115 | 0.115 | 0.115 | 0.115 | 0.109      |
| E5  | 0.000 | 0.000 | 0.056 | 0.056 | 0.000 | 0.389 | 0.039 | 0.039 | 0.039 | 0.039 | 0.039 | 0.063      |
| E6  | 0.000 | 0.000 | 0.056 | 0.056 | 0.409 | 0.000 | 0.115 | 0.115 | 0.115 | 0.115 | 0.115 | 0.086      |
| E7  | 0.135 | 0.167 | 0.182 | 0.100 | 0.050 | 0.063 | 0.000 | 0.000 | 0.000 | 0.000 | 0.000 | 0.073      |
| E8  | 0.430 | 0.167 | 0.091 | 0.050 | 0.200 | 0.250 | 0.000 | 0.000 | 0.000 | 0.000 | 0.000 | 0.133      |
| E9  | 0.045 | 0.167 | 0.091 | 0.200 | 0.050 | 0.063 | 0.000 | 0.000 | 0.000 | 0.000 | 0.000 | 0.055      |
| E10 | 0.255 | 0.333 | 0.091 | 0.100 | 0.100 | 0.063 | 0.000 | 0.000 | 0.000 | 0.000 | 0.000 | 0.088      |
| E11 | 0.135 | 0.167 | 0.045 | 0.050 | 0.100 | 0.063 | 0.000 | 0.000 | 0.000 | 0.000 | 0.000 | 0.051      |

Table S58. Case 16's X Influence Matrix.

|     | E1 | E2 | E3 | E4 | E5 | E6 | E7 | E8 | E9 | E10 | E11 |
|-----|----|----|----|----|----|----|----|----|----|-----|-----|
| E1  | 0  | 0  | 0  | 0  | 0  | 0  | 4  | 4  | 4  | 4   | 4   |
| E2  | 0  | 0  | 0  | 0  | 0  | 0  | 0  | 0  | 0  | 0   | 0   |
| E3  | 0  | 0  | 0  | 4  | 0  | 0  | 2  | 2  | 2  | 2   | 2   |
| E4  | 0  | 0  | 4  | 0  | 0  | 0  | 1  | 1  | 1  | 1   | 1   |
| E5  | 0  | 0  | 0  | 0  | 0  | 4  | 0  | 0  | 0  | 0   | 0   |
| E6  | 0  | 0  | 0  | 0  | 4  | 0  | 1  | 1  | 1  | 1   | 1   |
| E7  | 1  | 2  | 2  | 1  | 0  | 0  | 0  | 0  | 0  | 0   | 0   |
| E8  | 4  | 2  | 1  | 0  | 2  | 3  | 0  | 0  | 0  | 0   | 0   |
| E9  | 0  | 2  | 1  | 2  | 0  | 0  | 0  | 0  | 0  | 0   | 0   |
| E10 | 2  | 4  | 1  | 1  | 1  | 0  | 0  | 0  | 0  | 0   | 0   |
| E11 | 1  | 2  | 0  | 0  | 1  | 0  | 0  | 0  | 0  | 0   | 0   |

Table S59. Case 16. Weighted Supermatrix and Priorities, according to procedure 1.

|     | E1    | E2    | E3    | E4    | E5    | E6    | E7    | E8    | E9    | E10   | E11   | Priorities |
|-----|-------|-------|-------|-------|-------|-------|-------|-------|-------|-------|-------|------------|
| E1  | 0.000 | 0.000 | 0.000 | 0.000 | 0.000 | 0.000 | 0.657 | 0.657 | 0.657 | 0.657 | 0.657 | 0.250      |
| E2  | 0.000 | 0.000 | 0.000 | 0.000 | 0.000 | 0.000 | 0.000 | 0.000 | 0.000 | 0.000 | 0.000 | 0.000      |
| E3  | 0.000 | 0.000 | 0.000 | 0.657 | 0.000 | 0.000 | 0.191 | 0.191 | 0.191 | 0.191 | 0.191 | 0.151      |
| E4  | 0.000 | 0.000 | 0.598 | 0.000 | 0.000 | 0.000 | 0.076 | 0.076 | 0.076 | 0.076 | 0.076 | 0.119      |
| E5  | 0.000 | 0.000 | 0.000 | 0.000 | 0.000 | 0.750 | 0.000 | 0.000 | 0.000 | 0.000 | 0.000 | 0.043      |
| E6  | 0.000 | 0.000 | 0.000 | 0.000 | 0.657 | 0.000 | 0.076 | 0.076 | 0.076 | 0.076 | 0.076 | 0.057      |
| E7  | 0.076 | 0.111 | 0.187 | 0.076 | 0.000 | 0.000 | 0.000 | 0.000 | 0.000 | 0.000 | 0.000 | 0.056      |
| E8  | 0.657 | 0.111 | 0.071 | 0.000 | 0.191 | 0.250 | 0.000 | 0.000 | 0.000 | 0.000 | 0.000 | 0.197      |
| E9  | 0.000 | 0.111 | 0.071 | 0.191 | 0.000 | 0.000 | 0.000 | 0.000 | 0.000 | 0.000 | 0.000 | 0.034      |
| E10 | 0.191 | 0.556 | 0.071 | 0.076 | 0.076 | 0.000 | 0.000 | 0.000 | 0.000 | 0.000 | 0.000 | 0.071      |
| E11 | 0.076 | 0.111 | 0.000 | 0.000 | 0.076 | 0.000 | 0.000 | 0.000 | 0.000 | 0.000 | 0.000 | 0.022      |

Table S60. Case 16. Weighted Supermatrix and Priorities, according to procedure 2.

|     | E1    | E2    | E3    | E4    | E5    | E6    | E7    | E8    | E9    | E10   | E11   | Priorities |
|-----|-------|-------|-------|-------|-------|-------|-------|-------|-------|-------|-------|------------|
| E1  | 0.033 | 0.026 | 0.030 | 0.033 | 0.033 | 0.039 | 0.414 | 0.414 | 0.414 | 0.414 | 0.414 | 0.187      |
| E2  | 0.033 | 0.026 | 0.030 | 0.033 | 0.033 | 0.039 | 0.033 | 0.033 | 0.033 | 0.033 | 0.033 | 0.033      |
| E3  | 0.033 | 0.026 | 0.030 | 0.414 | 0.033 | 0.039 | 0.175 | 0.175 | 0.175 | 0.175 | 0.175 | 0.130      |
| E4  | 0.033 | 0.026 | 0.408 | 0.033 | 0.033 | 0.039 | 0.089 | 0.089 | 0.089 | 0.089 | 0.089 | 0.105      |
| E5  | 0.033 | 0.026 | 0.030 | 0.033 | 0.033 | 0.391 | 0.033 | 0.033 | 0.033 | 0.033 | 0.033 | 0.061      |
| E6  | 0.033 | 0.026 | 0.030 | 0.033 | 0.414 | 0.039 | 0.089 | 0.089 | 0.089 | 0.089 | 0.089 | 0.079      |
| E7  | 0.089 | 0.119 | 0.168 | 0.089 | 0.033 | 0.039 | 0.033 | 0.033 | 0.033 | 0.033 | 0.033 | 0.070      |
| E8  | 0.414 | 0.119 | 0.080 | 0.033 | 0.175 | 0.257 | 0.033 | 0.033 | 0.033 | 0.033 | 0.033 | 0.140      |
| E9  | 0.033 | 0.119 | 0.080 | 0.175 | 0.033 | 0.039 | 0.033 | 0.033 | 0.033 | 0.033 | 0.033 | 0.058      |
| E10 | 0.175 | 0.370 | 0.080 | 0.089 | 0.089 | 0.039 | 0.033 | 0.033 | 0.033 | 0.033 | 0.033 | 0.087      |
| E11 | 0.089 | 0.119 | 0.030 | 0.033 | 0.089 | 0.039 | 0.033 | 0.033 | 0.033 | 0.033 | 0.033 | 0.050      |

Table S61. Case 17. Original Weighted Supermatrix and Priorities.

|     | E1    | E2    | E3    | E4    | E5    | E6    | E7    | E8    | E9    | E10   | E11   | E12   | E13   | E14   | E15   | Priorities |
|-----|-------|-------|-------|-------|-------|-------|-------|-------|-------|-------|-------|-------|-------|-------|-------|------------|
| E1  | 0.000 | 0.063 | 0.009 | 0.023 | 0.022 | 0.007 | 0.027 | 0.008 | 0.013 | 0.026 | 0.014 | 0.014 | 0.024 | 0.048 | 0.051 | 0.022      |
| E2  | 0.066 | 0.000 | 0.066 | 0.006 | 0.008 | 0.064 | 0.015 | 0.022 | 0.026 | 0.013 | 0.067 | 0.026 | 0.052 | 0.018 | 0.010 | 0.037      |
| E3  | 0.009 | 0.013 | 0.000 | 0.063 | 0.062 | 0.021 | 0.050 | 0.062 | 0.053 | 0.053 | 0.007 | 0.047 | 0.011 | 0.021 | 0.027 | 0.030      |
| E4  | 0.128 | 0.085 | 0.125 | 0.000 | 0.205 | 0.325 | 0.000 | 0.000 | 0.410 | 0.000 | 0.000 | 0.000 | 0.000 | 0.000 | 0.000 | 0.093      |
| E5  | 0.076 | 0.084 | 0.054 | 0.077 | 0.000 | 0.000 | 0.000 | 0.000 | 0.000 | 0.000 | 0.000 | 0.000 | 0.000 | 0.000 | 0.000 | 0.014      |
| E6  | 0.087 | 0.146 | 0.135 | 0.538 | 0.410 | 0.000 | 0.410 | 0.077 | 0.137 | 0.000 | 0.000 | 0.000 | 0.011 | 0.015 | 0.000 | 0.107      |
| E7  | 0.075 | 0.043 | 0.046 | 0.000 | 0.000 | 0.086 | 0.000 | 0.538 | 0.000 | 0.615 | 0.000 | 0.000 | 0.026 | 0.034 | 0.000 | 0.050      |
| E8  | 0.043 | 0.033 | 0.025 | 0.000 | 0.000 | 0.205 | 0.205 | 0.000 | 0.068 | 0.000 | 0.000 | 0.000 | 0.042 | 0.016 | 0.023 | 0.047      |
| E9  | 0.137 | 0.151 | 0.124 | 0.000 | 0.000 | 0.000 | 0.000 | 0.000 | 0.000 | 0.000 | 0.243 | 0.243 | 0.112 | 0.140 | 0.179 | 0.112      |
| E10 | 0.045 | 0.049 | 0.082 | 0.000 | 0.000 | 0.000 | 0.000 | 0.000 | 0.000 | 0.000 | 0.000 | 0.000 | 0.051 | 0.038 | 0.040 | 0.013      |
| E11 | 0.154 | 0.098 | 0.151 | 0.292 | 0.292 | 0.292 | 0.292 | 0.292 | 0.042 | 0.292 | 0.000 | 0.286 | 0.000 | 0.268 | 0.586 | 0.229      |
| E12 | 0.077 | 0.051 | 0.019 | 0.000 | 0.000 | 0.000 | 0.000 | 0.000 | 0.250 | 0.000 | 0.054 | 0.000 | 0.000 | 0.134 | 0.084 | 0.059      |
| E13 | 0.029 | 0.025 | 0.033 | 0.000 | 0.000 | 0.000 | 0.000 | 0.000 | 0.000 | 0.000 | 0.100 | 0.058 | 0.000 | 0.268 | 0.000 | 0.039      |
| E14 | 0.027 | 0.056 | 0.052 | 0.000 | 0.000 | 0.000 | 0.000 | 0.000 | 0.000 | 0.000 | 0.113 | 0.134 | 0.000 | 0.000 | 0.000 | 0.038      |
| E15 | 0.047 | 0.103 | 0.079 | 0.000 | 0.000 | 0.000 | 0.000 | 0.000 | 0.000 | 0.000 | 0.402 | 0.190 | 0.000 | 0.000 | 0.000 | 0.110      |

Table S62. Case 17's X Influence Matrix.

|     | E1 | E2 | E3 | E4 | E5 | E6 | E7 | E8 | E9 | E10 | E11 | E12 | E13 | E14 | E15 |
|-----|----|----|----|----|----|----|----|----|----|-----|-----|-----|-----|-----|-----|
| E1  | 0  | 2  | 0  | 0  | 0  | 0  | 0  | 0  | 0  | 0   | 0   | 0   | 1   | 0   | 0   |
| E2  | 2  | 0  | 2  | 0  | 0  | 0  | 0  | 0  | 0  | 0   | 0   | 0   | 2   | 0   | 0   |
| E3  | 0  | 0  | 0  | 0  | 0  | 0  | 0  | 0  | 0  | 0   | 0   | 0   | 0   | 0   | 0   |
| E4  | 4  | 2  | 4  | 0  | 2  | 4  | 0  | 0  | 4  | 0   | 0   | 0   | 0   | 0   | 0   |
| E5  | 2  | 2  | 1  | 0  | 0  | 0  | 0  | 0  | 0  | 0   | 0   | 0   | 0   | 0   | 0   |
| E6  | 2  | 4  | 4  | 4  | 4  | 0  | 4  | 0  | 1  | 0   | 0   | 0   | 0   | 0   | 0   |
| E7  | 2  | 1  | 1  | 0  | 0  | 1  | 0  | 4  | 0  | 4   | 0   | 0   | 1   | 0   | 0   |
| E8  | 1  | 1  | 0  | 0  | 0  | 3  | 2  | 0  | 0  | 0   | 0   | 0   | 1   | 0   | 0   |
| E9  | 4  | 4  | 4  | 0  | 0  | 0  | 0  | 0  | 0  | 0   | 3   | 4   | 4   | 2   | 1   |
| E10 | 1  | 1  | 2  | 0  | 0  | 0  | 0  | 0  | 0  | 0   | 0   | 0   | 2   | 0   | 0   |
| E11 | 4  | 3  | 4  | 2  | 3  | 4  | 3  | 2  | 0  | 2   | 0   | 4   | 0   | 4   | 4   |
| E12 | 2  | 1  | 0  | 0  | 0  | 0  | 0  | 0  | 3  | 0   | 0   | 0   | 0   | 2   | 0   |
| E13 | 0  | 0  | 1  | 0  | 0  | 0  | 0  | 0  | 0  | 0   | 1   | 1   | 0   | 4   | 0   |
| E14 | 0  | 1  | 1  | 0  | 0  | 0  | 0  | 0  | 0  | 0   | 1   | 2   | 0   | 0   | 0   |
| E15 | 1  | 3  | 2  | 0  | 0  | 0  | 0  | 0  | 0  | 0   | 4   | 3   | 0   | 0   | 0   |

Table S63. Case 17. Weighted Supermatrix and Priorities, according to procedure 1.

|     | E1    | E2    | E3    | E4    | E5    | E6    | E7    | E8    | E9    | E10   | E11   | E12   | E13   | E14   | E15   | Priorities |
|-----|-------|-------|-------|-------|-------|-------|-------|-------|-------|-------|-------|-------|-------|-------|-------|------------|
| E1  | 0.000 | 0.057 | 0.000 | 0.000 | 0.000 | 0.000 | 0.000 | 0.000 | 0.000 | 0.000 | 0.000 | 0.000 | 0.057 | 0.000 | 0.000 | 0.002      |
| E2  | 0.054 | 0.000 | 0.051 | 0.000 | 0.000 | 0.000 | 0.000 | 0.000 | 0.000 | 0.000 | 0.000 | 0.000 | 0.150 | 0.000 | 0.000 | 0.004      |
| E3  | 0.000 | 0.000 | 0.000 | 0.000 | 0.000 | 0.000 | 0.000 | 0.000 | 0.000 | 0.000 | 0.000 | 0.000 | 0.000 | 0.000 | 0.000 | 0.000      |
| E4  | 0.221 | 0.057 | 0.190 | 0.000 | 0.105 | 0.395 | 0.000 | 0.000 | 0.649 | 0.000 | 0.000 | 0.000 | 0.000 | 0.000 | 0.000 | 0.141      |
| E5  | 0.054 | 0.057 | 0.022 | 0.000 | 0.000 | 0.000 | 0.000 | 0.000 | 0.000 | 0.000 | 0.000 | 0.000 | 0.000 | 0.000 | 0.000 | 0.000      |
| E6  | 0.054 | 0.234 | 0.190 | 0.833 | 0.637 | 0.000 | 0.637 | 0.000 | 0.072 | 0.000 | 0.000 | 0.000 | 0.000 | 0.000 | 0.000 | 0.152      |
| E7  | 0.054 | 0.024 | 0.022 | 0.000 | 0.000 | 0.047 | 0.000 | 0.833 | 0.000 | 0.833 | 0.000 | 0.000 | 0.057 | 0.000 | 0.000 | 0.038      |
| E8  | 0.022 | 0.024 | 0.000 | 0.000 | 0.000 | 0.163 | 0.105 | 0.000 | 0.000 | 0.000 | 0.000 | 0.000 | 0.057 | 0.000 | 0.000 | 0.030      |
| E9  | 0.221 | 0.234 | 0.190 | 0.000 | 0.000 | 0.000 | 0.000 | 0.000 | 0.000 | 0.000 | 0.282 | 0.362 | 0.529 | 0.083 | 0.125 | 0.124      |
| E10 | 0.022 | 0.024 | 0.051 | 0.000 | 0.000 | 0.000 | 0.000 | 0.000 | 0.000 | 0.000 | 0.000 | 0.000 | 0.150 | 0.000 | 0.000 | 0.004      |
| E11 | 0.221 | 0.122 | 0.190 | 0.167 | 0.258 | 0.395 | 0.258 | 0.167 | 0.000 | 0.167 | 0.000 | 0.362 | 0.000 | 0.417 | 0.875 | 0.260      |
| E12 | 0.054 | 0.024 | 0.000 | 0.000 | 0.000 | 0.000 | 0.000 | 0.000 | 0.279 | 0.000 | 0.000 | 0.000 | 0.000 | 0.083 | 0.000 | 0.037      |
| E13 | 0.000 | 0.000 | 0.022 | 0.000 | 0.000 | 0.000 | 0.000 | 0.000 | 0.000 | 0.000 | 0.067 | 0.039 | 0.000 | 0.417 | 0.000 | 0.027      |
| E14 | 0.000 | 0.024 | 0.022 | 0.000 | 0.000 | 0.000 | 0.000 | 0.000 | 0.000 | 0.000 | 0.067 | 0.076 | 0.000 | 0.000 | 0.000 | 0.020      |
| E15 | 0.022 | 0.122 | 0.051 | 0.000 | 0.000 | 0.000 | 0.000 | 0.000 | 0.000 | 0.000 | 0.583 | 0.161 | 0.000 | 0.000 | 0.000 | 0.158      |

Table S64. Case 17. Weighted Supermatrix and Priorities, according to procedure 2.

|     | E1    | E2    | E3    | E4    | E5    | E6    | E7    | E8    | E9    | E10   | E11   | E12   | E13   | E14   | E15   | Priorities |
|-----|-------|-------|-------|-------|-------|-------|-------|-------|-------|-------|-------|-------|-------|-------|-------|------------|
| E1  | 0.013 | 0.059 | 0.012 | 0.036 | 0.029 | 0.024 | 0.029 | 0.036 | 0.031 | 0.036 | 0.028 | 0.021 | 0.064 | 0.024 | 0.039 | 0.032      |
| E2  | 0.057 | 0.013 | 0.055 | 0.036 | 0.029 | 0.024 | 0.029 | 0.036 | 0.031 | 0.036 | 0.028 | 0.021 | 0.131 | 0.024 | 0.039 | 0.036      |
| E3  | 0.013 | 0.013 | 0.012 | 0.036 | 0.029 | 0.024 | 0.029 | 0.036 | 0.031 | 0.036 | 0.028 | 0.021 | 0.024 | 0.024 | 0.039 | 0.028      |
| E4  | 0.194 | 0.059 | 0.171 | 0.036 | 0.132 | 0.253 | 0.029 | 0.036 | 0.325 | 0.036 | 0.028 | 0.021 | 0.024 | 0.024 | 0.039 | 0.101      |
| E5  | 0.057 | 0.059 | 0.026 | 0.036 | 0.029 | 0.024 | 0.029 | 0.036 | 0.031 | 0.036 | 0.028 | 0.021 | 0.024 | 0.024 | 0.039 | 0.032      |
| E6  | 0.057 | 0.209 | 0.171 | 0.360 | 0.312 | 0.024 | 0.312 | 0.036 | 0.085 | 0.036 | 0.028 | 0.021 | 0.024 | 0.024 | 0.039 | 0.108      |
| E7  | 0.057 | 0.026 | 0.026 | 0.036 | 0.029 | 0.064 | 0.029 | 0.360 | 0.031 | 0.360 | 0.028 | 0.021 | 0.064 | 0.024 | 0.039 | 0.066      |
| E8  | 0.026 | 0.026 | 0.012 | 0.036 | 0.029 | 0.165 | 0.132 | 0.036 | 0.031 | 0.036 | 0.028 | 0.021 | 0.064 | 0.024 | 0.039 | 0.053      |
| E9  | 0.194 | 0.209 | 0.171 | 0.036 | 0.029 | 0.024 | 0.029 | 0.036 | 0.031 | 0.036 | 0.215 | 0.242 | 0.325 | 0.108 | 0.112 | 0.113      |
| E10 | 0.026 | 0.026 | 0.055 | 0.036 | 0.029 | 0.024 | 0.029 | 0.036 | 0.031 | 0.036 | 0.028 | 0.021 | 0.131 | 0.024 | 0.039 | 0.036      |
| E11 | 0.194 | 0.117 | 0.171 | 0.172 | 0.208 | 0.253 | 0.208 | 0.172 | 0.031 | 0.172 | 0.028 | 0.242 | 0.024 | 0.261 | 0.381 | 0.162      |
| E12 | 0.057 | 0.026 | 0.012 | 0.036 | 0.029 | 0.024 | 0.029 | 0.036 | 0.221 | 0.036 | 0.028 | 0.021 | 0.024 | 0.108 | 0.039 | 0.055      |
| E13 | 0.013 | 0.013 | 0.026 | 0.036 | 0.029 | 0.024 | 0.029 | 0.036 | 0.031 | 0.036 | 0.077 | 0.054 | 0.024 | 0.261 | 0.039 | 0.048      |
| E14 | 0.013 | 0.026 | 0.026 | 0.036 | 0.029 | 0.024 | 0.029 | 0.036 | 0.031 | 0.036 | 0.077 | 0.096 | 0.024 | 0.024 | 0.039 | 0.041      |
| E15 | 0.026 | 0.117 | 0.055 | 0.036 | 0.029 | 0.024 | 0.029 | 0.036 | 0.031 | 0.036 | 0.319 | 0.154 | 0.024 | 0.024 | 0.039 | 0.088      |

Table S65. Case 18. Original Weighted Supermatrix and Priorities.

|     | E1    | E2    | E3    | E4    | E5    | E6    | E7    | E8    | E9    | E10   | E11   | E12   | E13   | E14   | E15   | E16   | E17   | E18   | E19   | E20   | E21   | E22   | E23   | Priorities |
|-----|-------|-------|-------|-------|-------|-------|-------|-------|-------|-------|-------|-------|-------|-------|-------|-------|-------|-------|-------|-------|-------|-------|-------|------------|
| E1  | 0.140 | 0.110 | 0.120 | 0.090 | 0.100 | 0.150 | 0.100 | 0.000 | 0.000 | 0.000 | 0.000 | 0.000 | 0.000 | 0.000 | 0.000 | 0.000 | 0.000 | 0.000 | 0.000 | 0.000 | 0.000 | 0.000 | 0.000 | 0.037      |
| E2  | 0.090 | 0.120 | 0.100 | 0.160 | 0.080 | 0.070 | 0.080 | 0.000 | 0.000 | 0.000 | 0.000 | 0.000 | 0.000 | 0.000 | 0.000 | 0.000 | 0.000 | 0.000 | 0.000 | 0.000 | 0.000 | 0.000 | 0.000 | 0.029      |
| E3  | 0.220 | 0.180 | 0.150 | 0.190 | 0.190 | 0.210 | 0.170 | 0.000 | 0.000 | 0.000 | 0.000 | 0.000 | 0.000 | 0.000 | 0.000 | 0.000 | 0.000 | 0.000 | 0.000 | 0.000 | 0.000 | 0.000 | 0.000 | 0.057      |
| E4  | 0.110 | 0.100 | 0.150 | 0.140 | 0.120 | 0.100 | 0.150 | 0.000 | 0.000 | 0.000 | 0.000 | 0.000 | 0.000 | 0.000 | 0.000 | 0.000 | 0.000 | 0.000 | 0.000 | 0.000 | 0.000 | 0.000 | 0.000 | 0.037      |
| E5  | 0.100 | 0.070 | 0.060 | 0.050 | 0.080 | 0.090 | 0.050 | 0.000 | 0.000 | 0.000 | 0.000 | 0.000 | 0.000 | 0.000 | 0.000 | 0.000 | 0.000 | 0.000 | 0.000 | 0.000 | 0.000 | 0.000 | 0.000 | 0.022      |
| E6  | 0.240 | 0.290 | 0.280 | 0.300 | 0.290 | 0.270 | 0.350 | 0.000 | 0.000 | 0.000 | 0.000 | 0.000 | 0.000 | 0.000 | 0.000 | 0.000 | 0.000 | 0.000 | 0.000 | 0.000 | 0.000 | 0.000 | 0.000 | 0.086      |
| E7  | 0.110 | 0.120 | 0.130 | 0.080 | 0.140 | 0.120 | 0.100 | 0.000 | 0.000 | 0.000 | 0.000 | 0.000 | 0.000 | 0.000 | 0.000 | 0.000 | 0.000 | 0.000 | 0.000 | 0.000 | 0.000 | 0.000 | 0.000 | 0.035      |
| E8  | 0.000 | 0.000 | 0.000 | 0.000 | 0.000 | 0.000 | 0.000 | 0.330 | 0.230 | 0.330 | 0.240 | 0.100 | 0.200 | 0.040 | 0.000 | 0.000 | 0.040 | 0.000 | 0.000 | 0.000 | 0.000 | 0.000 | 0.000 | 0.070      |
| E9  | 0.000 | 0.000 | 0.000 | 0.000 | 0.000 | 0.000 | 0.000 | 0.090 | 0.120 | 0.100 | 0.110 | 0.060 | 0.120 | 0.040 | 0.000 | 0.000 | 0.030 | 0.000 | 0.000 | 0.000 | 0.000 | 0.000 | 0.000 | 0.028      |
| E10 | 0.000 | 0.000 | 0.000 | 0.000 | 0.000 | 0.000 | 0.000 | 0.190 | 0.180 | 0.220 | 0.330 | 0.180 | 0.320 | 0.040 | 0.000 | 0.000 | 0.030 | 0.000 | 0.000 | 0.000 | 0.000 | 0.000 | 0.000 | 0.062      |
| E11 | 0.000 | 0.000 | 0.000 | 0.000 | 0.000 | 0.000 | 0.000 | 0.070 | 0.060 | 0.100 | 0.080 | 0.060 | 0.100 | 0.040 | 0.000 | 0.000 | 0.040 | 0.000 | 0.000 | 0.000 | 0.000 | 0.000 | 0.000 | 0.024      |
| E12 | 0.000 | 0.000 | 0.000 | 0.000 | 0.000 | 0.000 | 0.000 | 0.210 | 0.340 | 0.180 | 0.180 | 0.070 | 0.190 | 0.170 | 0.000 | 0.000 | 0.130 | 0.000 | 0.000 | 0.000 | 0.000 | 0.000 | 0.000 | 0.062      |
| E13 | 0.000 | 0.000 | 0.000 | 0.000 | 0.000 | 0.000 | 0.000 | 0.120 | 0.080 | 0.080 | 0.070 | 0.040 | 0.070 | 0.050 | 0.000 | 0.000 | 0.030 | 0.000 | 0.000 | 0.000 | 0.000 | 0.000 | 0.000 | 0.025      |
| E14 | 0.000 | 0.000 | 0.000 | 0.000 | 0.000 | 0.000 | 0.000 | 0.000 | 0.000 | 0.000 | 0.000 | 0.260 | 0.000 | 0.250 | 0.500 | 0.000 | 0.180 | 0.000 | 0.000 | 0.000 | 0.000 | 0.000 | 0.000 | 0.052      |
| E15 | 0.000 | 0.000 | 0.000 | 0.000 | 0.000 | 0.000 | 0.000 | 0.000 | 0.000 | 0.000 | 0.000 | 0.040 | 0.000 | 0.250 | 0.500 | 0.000 | 0.030 | 0.000 | 0.000 | 0.000 | 0.000 | 0.000 | 0.000 | 0.034      |
| E16 | 0.000 | 0.000 | 0.000 | 0.000 | 0.000 | 0.000 | 0.000 | 0.000 | 0.000 | 0.000 | 0.000 | 0.030 | 0.000 | 0.010 | 0.000 | 0.400 | 0.200 | 0.500 | 0.000 | 0.000 | 0.000 | 0.000 | 0.000 | 0.047      |
| E17 | 0.000 | 0.000 | 0.000 | 0.000 | 0.000 | 0.000 | 0.000 | 0.000 | 0.000 | 0.000 | 0.000 | 0.150 | 0.000 | 0.080 | 0.000 | 0.200 | 0.100 | 0.250 | 0.000 | 0.000 | 0.000 | 0.000 | 0.000 | 0.036      |
| E18 | 0.000 | 0.000 | 0.000 | 0.000 | 0.000 | 0.000 | 0.000 | 0.000 | 0.000 | 0.000 | 0.000 | 0.030 | 0.000 | 0.010 | 0.000 | 0.400 | 0.200 | 0.250 | 0.000 | 0.000 | 0.000 | 0.000 | 0.000 | 0.038      |
| E19 | 0.000 | 0.000 | 0.000 | 0.000 | 0.000 | 0.000 | 0.000 | 0.000 | 0.000 | 0.000 | 0.000 | 0.000 | 0.000 | 0.000 | 0.000 | 0.000 | 0.000 | 0.000 | 0.170 | 0.250 | 0.340 | 0.370 | 0.250 | 0.059      |
| E20 | 0.000 | 0.000 | 0.000 | 0.000 | 0.000 | 0.000 | 0.000 | 0.000 | 0.000 | 0.000 | 0.000 | 0.000 | 0.000 | 0.000 | 0.000 | 0.000 | 0.000 | 0.000 | 0.290 | 0.260 | 0.280 | 0.200 | 0.170 | 0.053      |
| E21 | 0.000 | 0.000 | 0.000 | 0.000 | 0.000 | 0.000 | 0.000 | 0.000 | 0.000 | 0.000 | 0.000 | 0.000 | 0.000 | 0.000 | 0.000 | 0.000 | 0.000 | 0.000 | 0.120 | 0.100 | 0.100 | 0.100 | 0.090 | 0.023      |
| E22 | 0.000 | 0.000 | 0.000 | 0.000 | 0.000 | 0.000 | 0.000 | 0.000 | 0.000 | 0.000 | 0.000 | 0.000 | 0.000 | 0.000 | 0.000 | 0.000 | 0.000 | 0.000 | 0.320 | 0.290 | 0.180 | 0.230 | 0.400 | 0.061      |
| E23 | 0.000 | 0.000 | 0.000 | 0.000 | 0.000 | 0.000 | 0.000 | 0.000 | 0.000 | 0.000 | 0.000 | 0.000 | 0.000 | 0.000 | 0.000 | 0.000 | 0.000 | 0.000 | 0.100 | 0.110 | 0.100 | 0.100 | 0.090 | 0.022      |

Table S66. Case 18's X Influence Matrix.

|     | E1 | E2 | E3 | E4 | E5 | E6 | E7 | E8 | E9 | E10 | E11 | E12 | E13 | E14 | E15 | E16 | E17 | E18 | E19 | E20 | E21 | E22 | E23 |
|-----|----|----|----|----|----|----|----|----|----|-----|-----|-----|-----|-----|-----|-----|-----|-----|-----|-----|-----|-----|-----|
| E1  | 2  | 1  | 2  | 1  | 1  | 2  | 1  | 0  | 0  | 0   | 0   | 0   | 0   | 0   | 0   | 0   | 0   | 0   | 0   | 0   | 0   | 0   | 0   |
| E2  | 1  | 2  | 1  | 2  | 1  | 1  | 1  | 0  | 0  | 0   | 0   | 0   | 0   | 0   | 0   | 0   | 0   | 0   | 0   | 0   | 0   | 0   | 0   |
| E3  | 4  | 3  | 2  | 3  | 3  | 3  | 2  | 0  | 0  | 0   | 0   | 0   | 0   | 0   | 0   | 0   | 0   | 0   | 0   | 0   | 0   | 0   | 0   |
| E4  | 2  | 1  | 2  | 2  | 2  | 1  | 2  | 0  | 0  | 0   | 0   | 0   | 0   | 0   | 0   | 0   | 0   | 0   | 0   | 0   | 0   | 0   | 0   |
| E5  | 2  | 1  | 1  | 0  | 1  | 1  | 0  | 0  | 0  | 0   | 0   | 0   | 0   | 0   | 0   | 0   | 0   | 0   | 0   | 0   | 0   | 0   | 0   |
| E6  | 4  | 4  | 4  | 4  | 4  | 4  | 4  | 0  | 0  | 0   | 0   | 0   | 0   | 0   | 0   | 0   | 0   | 0   | 0   | 0   | 0   | 0   | 0   |
| E7  | 2  | 2  | 2  | 1  | 2  | 2  | 1  | 0  | 0  | 0   | 0   | 0   | 0   | 0   | 0   | 0   | 0   | 0   | 0   | 0   | 0   | 0   | 0   |
| E8  | 0  | 0  | 0  | 0  | 0  | 0  | 0  | 4  | 3  | 4   | 3   | 1   | 3   | 0   | 0   | 0   | 1   | 0   | 0   | 0   | 0   | 0   | 0   |
| E9  | 0  | 0  | 0  | 0  | 0  | 0  | 0  | 1  | 1  | 1   | 1   | 1   | 1   | 0   | 0   | 0   | 0   | 0   | 0   | 0   | 0   | 0   | 0   |
| E10 | 0  | 0  | 0  | 0  | 0  | 0  | 0  | 2  | 2  | 3   | 4   | 3   | 4   | 0   | 0   | 0   | 0   | 0   | 0   | 0   | 0   | 0   | 0   |
| E11 | 0  | 0  | 0  | 0  | 0  | 0  | 0  | 1  | 0  | 1   | 1   | 1   | 1   | 0   | 0   | 0   | 1   | 0   | 0   | 0   | 0   | 0   | 0   |
| E12 | 0  | 0  | 0  | 0  | 0  | 0  | 0  | 3  | 4  | 2   | 2   | 1   | 2   | 3   | 0   | 0   | 3   | 0   | 0   | 0   | 0   | 0   | 0   |
| E13 | 0  | 0  | 0  | 0  | 0  | 0  | 0  | 1  | 1  | 1   | 1   | 0   | 1   | 1   | 0   | 0   | 0   | 0   | 0   | 0   | 0   | 0   | 0   |
| E14 | 0  | 0  | 0  | 0  | 0  | 0  | 0  | 0  | 0  | 0   | 0   | 4   | 0   | 4   | 4   | 0   | 4   | 0   | 0   | 0   | 0   | 0   | 0   |
| E15 | 0  | 0  | 0  | 0  | 0  | 0  | 0  | 0  | 0  | 0   | 0   | 0   | 0   | 4   | 4   | 0   | 0   | 0   | 0   | 0   | 0   | 0   | 0   |
| E16 | 0  | 0  | 0  | 0  | 0  | 0  | 0  | 0  | 0  | 0   | 0   | 0   | 0   | 0   | 0   | 4   | 4   | 4   | 0   | 0   | 0   | 0   | 0   |
| E17 | 0  | 0  | 0  | 0  | 0  | 0  | 0  | 0  | 0  | 0   | 0   | 2   | 0   | 1   | 0   | 2   | 2   | 2   | 0   | 0   | 0   | 0   | 0   |
| E18 | 0  | 0  | 0  | 0  | 0  | 0  | 0  | 0  | 0  | 0   | 0   | 0   | 0   | 0   | 0   | 4   | 4   | 2   | 0   | 0   | 0   | 0   | 0   |
| E19 | 0  | 0  | 0  | 0  | 0  | 0  | 0  | 0  | 0  | 0   | 0   | 0   | 0   | 0   | 0   | 0   | 0   | 0   | 2   | 4   | 4   | 4   | 3   |
| E20 | 0  | 0  | 0  | 0  | 0  | 0  | 0  | 0  | 0  | 0   | 0   | 0   | 0   | 0   | 0   | 0   | 0   | 0   | 4   | 4   | 4   | 2   | 2   |
| E21 | 0  | 0  | 0  | 0  | 0  | 0  | 0  | 0  | 0  | 0   | 0   | 0   | 0   | 0   | 0   | 0   | 0   | 0   | 1   | 1   | 1   | 1   | 1   |
| E22 | 0  | 0  | 0  | 0  | 0  | 0  | 0  | 0  | 0  | 0   | 0   | 0   | 0   | 0   | 0   | 0   | 0   | 0   | 4   | 4   | 2   | 3   | 4   |
| E23 | 0  | 0  | 0  | 0  | 0  | 0  | 0  | 0  | 0  | 0   | 0   | 0   | 0   | 0   | 0   | 0   | 0   | 0   | 1   | 1   | 1   | 1   | 1   |

Table S67. Case 18. Weighted Supermatrix and Priorities, according to procedure 1.

|     | E1    | E2    | E3    | E4    | E5    | E6    | E7    | E8    | E9    | E10   | E11   | E12   | E13   | E14   | E15   | E16   | E17   | E18   | E19   | E20   | E21   | E22   | E23   | Priorities |
|-----|-------|-------|-------|-------|-------|-------|-------|-------|-------|-------|-------|-------|-------|-------|-------|-------|-------|-------|-------|-------|-------|-------|-------|------------|
| E1  | 0.074 | 0.043 | 0.112 | 0.044 | 0.043 | 0.106 | 0.057 | 0.000 | 0.000 | 0.000 | 0.000 | 0.000 | 0.000 | 0.000 | 0.000 | 0.000 | 0.000 | 0.000 | 0.000 | 0.000 | 0.000 | 0.000 | 0.000 | 0.027      |
| E2  | 0.032 | 0.106 | 0.042 | 0.105 | 0.043 | 0.043 | 0.057 | 0.000 | 0.000 | 0.000 | 0.000 | 0.000 | 0.000 | 0.000 | 0.000 | 0.000 | 0.000 | 0.000 | 0.000 | 0.000 | 0.000 | 0.000 | 0.000 | 0.016      |
| E3  | 0.335 | 0.230 | 0.112 | 0.238 | 0.230 | 0.230 | 0.150 | 0.000 | 0.000 | 0.000 | 0.000 | 0.000 | 0.000 | 0.000 | 0.000 | 0.000 | 0.000 | 0.000 | 0.000 | 0.000 | 0.000 | 0.000 | 0.000 | 0.063      |
| E4  | 0.074 | 0.043 | 0.112 | 0.105 | 0.106 | 0.043 | 0.150 | 0.000 | 0.000 | 0.000 | 0.000 | 0.000 | 0.000 | 0.000 | 0.000 | 0.000 | 0.000 | 0.000 | 0.000 | 0.000 | 0.000 | 0.000 | 0.000 | 0.024      |
| E5  | 0.074 | 0.043 | 0.042 | 0.000 | 0.043 | 0.043 | 0.000 | 0.000 | 0.000 | 0.000 | 0.000 | 0.000 | 0.000 | 0.000 | 0.000 | 0.000 | 0.000 | 0.000 | 0.000 | 0.000 | 0.000 | 0.000 | 0.000 | 0.012      |
| E6  | 0.335 | 0.430 | 0.466 | 0.463 | 0.430 | 0.430 | 0.529 | 0.000 | 0.000 | 0.000 | 0.000 | 0.000 | 0.000 | 0.000 | 0.000 | 0.000 | 0.000 | 0.000 | 0.000 | 0.000 | 0.000 | 0.000 | 0.000 | 0.134      |
| E7  | 0.074 | 0.106 | 0.112 | 0.044 | 0.106 | 0.106 | 0.057 | 0.000 | 0.000 | 0.000 | 0.000 | 0.000 | 0.000 | 0.000 | 0.000 | 0.000 | 0.000 | 0.000 | 0.000 | 0.000 | 0.000 | 0.000 | 0.000 | 0.029      |
| E8  | 0.000 | 0.000 | 0.000 | 0.000 | 0.000 | 0.000 | 0.000 | 0.474 | 0.258 | 0.474 | 0.251 | 0.049 | 0.251 | 0.000 | 0.000 | 0.000 | 0.029 | 0.000 | 0.000 | 0.000 | 0.000 | 0.000 | 0.000 | 0.052      |
| E9  | 0.000 | 0.000 | 0.000 | 0.000 | 0.000 | 0.000 | 0.000 | 0.051 | 0.053 | 0.051 | 0.051 | 0.049 | 0.051 | 0.000 | 0.000 | 0.000 | 0.000 | 0.000 | 0.000 | 0.000 | 0.000 | 0.000 | 0.000 | 0.008      |
| E10 | 0.000 | 0.000 | 0.000 | 0.000 | 0.000 | 0.000 | 0.000 | 0.123 | 0.122 | 0.251 | 0.474 | 0.242 | 0.474 | 0.000 | 0.000 | 0.000 | 0.000 | 0.000 | 0.000 | 0.000 | 0.000 | 0.000 | 0.000 | 0.037      |
| E11 | 0.000 | 0.000 | 0.000 | 0.000 | 0.000 | 0.000 | 0.000 | 0.051 | 0.000 | 0.051 | 0.051 | 0.049 | 0.051 | 0.000 | 0.000 | 0.000 | 0.029 | 0.000 | 0.000 | 0.000 | 0.000 | 0.000 | 0.000 | 0.009      |
| E12 | 0.000 | 0.000 | 0.000 | 0.000 | 0.000 | 0.000 | 0.000 | 0.251 | 0.514 | 0.123 | 0.123 | 0.049 | 0.123 | 0.170 | 0.000 | 0.000 | 0.118 | 0.000 | 0.000 | 0.000 | 0.000 | 0.000 | 0.000 | 0.047      |
| E13 | 0.000 | 0.000 | 0.000 | 0.000 | 0.000 | 0.000 | 0.000 | 0.051 | 0.053 | 0.051 | 0.051 | 0.000 | 0.051 | 0.045 | 0.000 | 0.000 | 0.000 | 0.000 | 0.000 | 0.000 | 0.000 | 0.000 | 0.000 | 0.011      |
| E14 | 0.000 | 0.000 | 0.000 | 0.000 | 0.000 | 0.000 | 0.000 | 0.000 | 0.000 | 0.000 | 0.000 | 0.440 | 0.000 | 0.370 | 0.500 | 0.000 | 0.255 | 0.000 | 0.000 | 0.000 | 0.000 | 0.000 | 0.000 | 0.103      |
| E15 | 0.000 | 0.000 | 0.000 | 0.000 | 0.000 | 0.000 | 0.000 | 0.000 | 0.000 | 0.000 | 0.000 | 0.000 | 0.000 | 0.370 | 0.500 | 0.000 | 0.000 | 0.000 | 0.000 | 0.000 | 0.000 | 0.000 | 0.000 | 0.076      |
| E16 | 0.000 | 0.000 | 0.000 | 0.000 | 0.000 | 0.000 | 0.000 | 0.000 | 0.000 | 0.000 | 0.000 | 0.000 | 0.000 | 0.000 | 0.000 | 0.455 | 0.255 | 0.714 | 0.000 | 0.000 | 0.000 | 0.000 | 0.000 | 0.068      |
| E17 | 0.000 | 0.000 | 0.000 | 0.000 | 0.000 | 0.000 | 0.000 | 0.000 | 0.000 | 0.000 | 0.000 | 0.123 | 0.000 | 0.045 | 0.000 | 0.091 | 0.060 | 0.143 | 0.000 | 0.000 | 0.000 | 0.000 | 0.000 | 0.024      |
| E18 | 0.000 | 0.000 | 0.000 | 0.000 | 0.000 | 0.000 | 0.000 | 0.000 | 0.000 | 0.000 | 0.000 | 0.000 | 0.000 | 0.000 | 0.000 | 0.455 | 0.255 | 0.143 | 0.000 | 0.000 | 0.000 | 0.000 | 0.000 | 0.043      |
| E19 | 0.000 | 0.000 | 0.000 | 0.000 | 0.000 | 0.000 | 0.000 | 0.000 | 0.000 | 0.000 | 0.000 | 0.000 | 0.000 | 0.000 | 0.000 | 0.000 | 0.000 | 0.000 | 0.110 | 0.304 | 0.397 | 0.514 | 0.258 | 0.068      |
| E20 | 0.000 | 0.000 | 0.000 | 0.000 | 0.000 | 0.000 | 0.000 | 0.000 | 0.000 | 0.000 | 0.000 | 0.000 | 0.000 | 0.000 | 0.000 | 0.000 | 0.000 | 0.000 | 0.397 | 0.304 | 0.397 | 0.122 | 0.122 | 0.059      |
| E21 | 0.000 | 0.000 | 0.000 | 0.000 | 0.000 | 0.000 | 0.000 | 0.000 | 0.000 | 0.000 | 0.000 | 0.000 | 0.000 | 0.000 | 0.000 | 0.000 | 0.000 | 0.000 | 0.048 | 0.043 | 0.048 | 0.053 | 0.053 | 0.011      |
| E22 | 0.000 | 0.000 | 0.000 | 0.000 | 0.000 | 0.000 | 0.000 | 0.000 | 0.000 | 0.000 | 0.000 | 0.000 | 0.000 | 0.000 | 0.000 | 0.000 | 0.000 | 0.000 | 0.397 | 0.304 | 0.110 | 0.258 | 0.514 | 0.069      |
| E23 | 0.000 | 0.000 | 0.000 | 0.000 | 0.000 | 0.000 | 0.000 | 0.000 | 0.000 | 0.000 | 0.000 | 0.000 | 0.000 | 0.000 | 0.000 | 0.000 | 0.000 | 0.000 | 0.048 | 0.043 | 0.048 | 0.053 | 0.053 | 0.011      |

Table S68. Case 18. Weighted Supermatrix and Priorities, according to procedure 2.

|     | E1    | E2    | E3    | E4    | E5    | E6    | E7    | E8    | E9    | E10   | E11   | E12   | E13   | E14   | E15   | E16   | E17   | E18   | E19   | E20   | E21   | E22   | E23   | Priorities |
|-----|-------|-------|-------|-------|-------|-------|-------|-------|-------|-------|-------|-------|-------|-------|-------|-------|-------|-------|-------|-------|-------|-------|-------|------------|
| E1  | 0.077 | 0.049 | 0.094 | 0.052 | 0.049 | 0.093 | 0.058 | 0.020 | 0.021 | 0.020 | 0.020 | 0.019 | 0.020 | 0.019 | 0.026 | 0.023 | 0.015 | 0.025 | 0.020 | 0.019 | 0.020 | 0.021 | 0.021 | 0.038      |
| E2  | 0.042 | 0.093 | 0.049 | 0.095 | 0.049 | 0.049 | 0.058 | 0.020 | 0.021 | 0.020 | 0.020 | 0.019 | 0.020 | 0.019 | 0.026 | 0.023 | 0.015 | 0.025 | 0.020 | 0.019 | 0.020 | 0.021 | 0.021 | 0.033      |
| E3  | 0.195 | 0.152 | 0.094 | 0.154 | 0.152 | 0.152 | 0.111 | 0.020 | 0.021 | 0.020 | 0.020 | 0.019 | 0.020 | 0.019 | 0.026 | 0.023 | 0.015 | 0.025 | 0.020 | 0.019 | 0.020 | 0.021 | 0.021 | 0.060      |
| E4  | 0.077 | 0.049 | 0.094 | 0.095 | 0.093 | 0.049 | 0.111 | 0.020 | 0.021 | 0.020 | 0.020 | 0.019 | 0.020 | 0.019 | 0.026 | 0.023 | 0.015 | 0.025 | 0.020 | 0.019 | 0.020 | 0.021 | 0.021 | 0.039      |
| E5  | 0.077 | 0.049 | 0.049 | 0.019 | 0.049 | 0.049 | 0.021 | 0.020 | 0.021 | 0.020 | 0.020 | 0.019 | 0.020 | 0.019 | 0.026 | 0.023 | 0.015 | 0.025 | 0.020 | 0.019 | 0.020 | 0.021 | 0.021 | 0.028      |
| E6  | 0.195 | 0.225 | 0.234 | 0.227 | 0.225 | 0.225 | 0.249 | 0.020 | 0.021 | 0.020 | 0.020 | 0.019 | 0.020 | 0.019 | 0.026 | 0.023 | 0.015 | 0.025 | 0.020 | 0.019 | 0.020 | 0.021 | 0.021 | 0.088      |
| E7  | 0.077 | 0.093 | 0.094 | 0.052 | 0.093 | 0.093 | 0.058 | 0.020 | 0.021 | 0.020 | 0.020 | 0.019 | 0.020 | 0.019 | 0.026 | 0.023 | 0.015 | 0.025 | 0.020 | 0.019 | 0.020 | 0.021 | 0.021 | 0.041      |
| E8  | 0.016 | 0.018 | 0.018 | 0.019 | 0.018 | 0.018 | 0.021 | 0.233 | 0.163 | 0.233 | 0.161 | 0.052 | 0.161 | 0.019 | 0.026 | 0.023 | 0.039 | 0.025 | 0.020 | 0.019 | 0.020 | 0.021 | 0.021 | 0.059      |
| E9  | 0.016 | 0.018 | 0.018 | 0.019 | 0.018 | 0.018 | 0.021 | 0.055 | 0.058 | 0.055 | 0.055 | 0.052 | 0.055 | 0.019 | 0.026 | 0.023 | 0.015 | 0.025 | 0.020 | 0.019 | 0.020 | 0.021 | 0.021 | 0.029      |
| E10 | 0.016 | 0.018 | 0.018 | 0.019 | 0.018 | 0.018 | 0.021 | 0.103 | 0.106 | 0.161 | 0.233 | 0.158 | 0.233 | 0.019 | 0.026 | 0.023 | 0.015 | 0.025 | 0.020 | 0.019 | 0.020 | 0.021 | 0.021 | 0.055      |
| E11 | 0.016 | 0.018 | 0.018 | 0.019 | 0.018 | 0.018 | 0.021 | 0.055 | 0.021 | 0.055 | 0.055 | 0.052 | 0.055 | 0.019 | 0.026 | 0.023 | 0.039 | 0.025 | 0.020 | 0.019 | 0.020 | 0.021 | 0.021 | 0.028      |
| E12 | 0.016 | 0.018 | 0.018 | 0.019 | 0.018 | 0.018 | 0.021 | 0.161 | 0.236 | 0.103 | 0.103 | 0.052 | 0.103 | 0.140 | 0.026 | 0.023 | 0.110 | 0.025 | 0.020 | 0.019 | 0.020 | 0.021 | 0.021 | 0.055      |
| E13 | 0.016 | 0.018 | 0.018 | 0.019 | 0.018 | 0.018 | 0.021 | 0.055 | 0.058 | 0.055 | 0.055 | 0.019 | 0.055 | 0.053 | 0.026 | 0.023 | 0.015 | 0.025 | 0.020 | 0.019 | 0.020 | 0.021 | 0.021 | 0.029      |
| E14 | 0.016 | 0.018 | 0.018 | 0.019 | 0.018 | 0.018 | 0.021 | 0.020 | 0.021 | 0.020 | 0.020 | 0.231 | 0.020 | 0.203 | 0.231 | 0.023 | 0.167 | 0.025 | 0.020 | 0.019 | 0.020 | 0.021 | 0.021 | 0.054      |
| E15 | 0.016 | 0.018 | 0.018 | 0.019 | 0.018 | 0.018 | 0.021 | 0.020 | 0.021 | 0.020 | 0.020 | 0.019 | 0.020 | 0.203 | 0.231 | 0.023 | 0.015 | 0.025 | 0.020 | 0.019 | 0.020 | 0.021 | 0.021 | 0.037      |
| E16 | 0.016 | 0.018 | 0.018 | 0.019 | 0.018 | 0.018 | 0.021 | 0.020 | 0.021 | 0.020 | 0.020 | 0.019 | 0.020 | 0.019 | 0.026 | 0.219 | 0.167 | 0.258 | 0.020 | 0.019 | 0.020 | 0.021 | 0.021 | 0.042      |
| E17 | 0.016 | 0.018 | 0.018 | 0.019 | 0.018 | 0.018 | 0.021 | 0.020 | 0.021 | 0.020 | 0.020 | 0.100 | 0.020 | 0.053 | 0.026 | 0.107 | 0.070 | 0.121 | 0.020 | 0.019 | 0.020 | 0.021 | 0.021 | 0.035      |
| E18 | 0.016 | 0.018 | 0.018 | 0.019 | 0.018 | 0.018 | 0.021 | 0.020 | 0.021 | 0.020 | 0.020 | 0.019 | 0.020 | 0.019 | 0.026 | 0.219 | 0.167 | 0.121 | 0.020 | 0.019 | 0.020 | 0.021 | 0.021 | 0.037      |
| E19 | 0.016 | 0.018 | 0.018 | 0.019 | 0.018 | 0.018 | 0.021 | 0.020 | 0.021 | 0.020 | 0.020 | 0.019 | 0.020 | 0.019 | 0.026 | 0.023 | 0.015 | 0.025 | 0.100 | 0.186 | 0.214 | 0.236 | 0.163 | 0.053      |
| E20 | 0.016 | 0.018 | 0.018 | 0.019 | 0.018 | 0.018 | 0.021 | 0.020 | 0.021 | 0.020 | 0.020 | 0.019 | 0.020 | 0.019 | 0.026 | 0.023 | 0.015 | 0.025 | 0.214 | 0.186 | 0.214 | 0.106 | 0.106 | 0.051      |
| E21 | 0.016 | 0.018 | 0.018 | 0.019 | 0.018 | 0.018 | 0.021 | 0.020 | 0.021 | 0.020 | 0.020 | 0.019 | 0.020 | 0.019 | 0.026 | 0.023 | 0.015 | 0.025 | 0.056 | 0.052 | 0.056 | 0.058 | 0.058 | 0.027      |
| E22 | 0.016 | 0.018 | 0.018 | 0.019 | 0.018 | 0.018 | 0.021 | 0.020 | 0.021 | 0.020 | 0.020 | 0.019 | 0.020 | 0.019 | 0.026 | 0.023 | 0.015 | 0.025 | 0.214 | 0.186 | 0.100 | 0.163 | 0.236 | 0.054      |
| E23 | 0.016 | 0.018 | 0.018 | 0.019 | 0.018 | 0.018 | 0.021 | 0.020 | 0.021 | 0.020 | 0.020 | 0.019 | 0.020 | 0.019 | 0.026 | 0.023 | 0.015 | 0.025 | 0.056 | 0.052 | 0.056 | 0.058 | 0.058 | 0.027      |



Table S69. Case 19. Original Weighted Supermatrix and Priorities.

[illegible]

Table S70. Case 19's X Influence Matrix.

|     | E1 | E2 | E3 | E4 | E5 | E6 | E7 | E8 | E9 | E10 | E11 | E12 |
|-----|----|----|----|----|----|----|----|----|----|-----|-----|-----|
| E1  | 0  | 0  | 0  | 0  | 4  | 4  | 4  | 4  | 4  | 2   | 1   | 2   |
| E2  | 0  | 0  | 0  | 0  | 3  | 2  | 2  | 3  | 2  | 3   | 3   | 4   |
| E3  | 0  | 0  | 0  | 0  | 2  | 2  | 1  | 2  | 4  | 3   | 4   | 4   |
| E4  | 0  | 0  | 0  | 0  | 1  | 0  | 1  | 1  | 4  | 4   | 4   | 3   |
| E5  | 1  | 3  | 4  | 2  | 0  | 0  | 0  | 0  | 0  | 0   | 0   | 0   |
| E6  | 2  | 2  | 3  | 1  | 0  | 0  | 0  | 0  | 0  | 0   | 0   | 0   |
| E7  | 1  | 2  | 1  | 2  | 0  | 0  | 0  | 0  | 0  | 0   | 0   | 0   |
| E8  | 3  | 4  | 2  | 2  | 0  | 0  | 0  | 0  | 0  | 0   | 0   | 0   |
| E9  | 4  | 2  | 2  | 0  | 0  | 0  | 0  | 0  | 0  | 0   | 0   | 0   |
| E10 | 0  | 1  | 1  | 0  | 0  | 0  | 0  | 0  | 0  | 0   | 0   | 0   |
| E11 | 0  | 0  | 0  | 4  | 0  | 0  | 0  | 0  | 0  | 0   | 0   | 0   |
| E12 | 0  | 0  | 2  | 2  | 0  | 0  | 0  | 0  | 0  | 0   | 0   | 0   |

Table S71. Case 19. Weighted Supermatrix and Priorities, according to procedure 1.

[illegible]

Table S72. Case 19. Weighted Supermatrix and Priorities, according to procedure 2.

|     | E1    | E2    | E3    | E4    | E5    | E6    | E7    | E8    | E9    | E10   | E11   | E12   | Priorities |
|-----|-------|-------|-------|-------|-------|-------|-------|-------|-------|-------|-------|-------|------------|
| E1  | 0.026 | 0.022 | 0.021 | 0.024 | 0.346 | 0.385 | 0.395 | 0.346 | 0.238 | 0.109 | 0.065 | 0.101 | 0.159      |
| E2  | 0.026 | 0.022 | 0.021 | 0.024 | 0.220 | 0.157 | 0.170 | 0.220 | 0.097 | 0.185 | 0.174 | 0.269 | 0.109      |
| E3  | 0.026 | 0.022 | 0.021 | 0.024 | 0.133 | 0.157 | 0.088 | 0.133 | 0.238 | 0.185 | 0.277 | 0.269 | 0.107      |
| E4  | 0.026 | 0.022 | 0.021 | 0.024 | 0.073 | 0.034 | 0.088 | 0.073 | 0.238 | 0.314 | 0.277 | 0.165 | 0.086      |
| E5  | 0.066 | 0.193 | 0.318 | 0.114 | 0.028 | 0.034 | 0.032 | 0.028 | 0.024 | 0.026 | 0.026 | 0.024 | 0.090      |
| E6  | 0.128 | 0.101 | 0.191 | 0.055 | 0.028 | 0.034 | 0.032 | 0.028 | 0.024 | 0.026 | 0.026 | 0.024 | 0.072      |
| E7  | 0.066 | 0.101 | 0.047 | 0.114 | 0.028 | 0.034 | 0.032 | 0.028 | 0.024 | 0.026 | 0.026 | 0.024 | 0.051      |
| E8  | 0.216 | 0.320 | 0.098 | 0.114 | 0.028 | 0.034 | 0.032 | 0.028 | 0.024 | 0.026 | 0.026 | 0.024 | 0.105      |
| E9  | 0.341 | 0.101 | 0.098 | 0.024 | 0.028 | 0.034 | 0.032 | 0.028 | 0.024 | 0.026 | 0.026 | 0.024 | 0.093      |
| E10 | 0.026 | 0.051 | 0.047 | 0.024 | 0.028 | 0.034 | 0.032 | 0.028 | 0.024 | 0.026 | 0.026 | 0.024 | 0.032      |
| E11 | 0.026 | 0.022 | 0.021 | 0.348 | 0.028 | 0.034 | 0.032 | 0.028 | 0.024 | 0.026 | 0.026 | 0.024 | 0.054      |
| E12 | 0.026 | 0.022 | 0.098 | 0.114 | 0.028 | 0.034 | 0.032 | 0.028 | 0.024 | 0.026 | 0.026 | 0.024 | 0.042      |

Table S73. Case 20. Original Weighted Supermatrix and Priorities.

|     | E1    | E2    | E3    | E4    | E5    | E6    | E7    | E8    | E9    | E10   | E11   | E12   | E13   | E14   | E15   | E16   | E17   | E18   | E19   | E20   |
|-----|-------|-------|-------|-------|-------|-------|-------|-------|-------|-------|-------|-------|-------|-------|-------|-------|-------|-------|-------|-------|
| E1  | 0.000 | 0.000 | 0.000 | 0.000 | 0.000 | 0.000 | 0.000 | 0.000 | 0.000 | 0.000 | 0.000 | 0.000 | 0.000 | 0.000 | 0.000 | 0.000 | 0.000 | 0.000 | 0.000 | 0.000 |
| E2  | 0.000 | 0.000 | 0.000 | 0.000 | 0.000 | 0.000 | 0.000 | 0.000 | 0.000 | 0.000 | 0.000 | 0.000 | 0.000 | 0.000 | 0.000 | 0.000 | 0.000 | 0.000 | 0.000 | 0.000 |
| E3  | 0.000 | 0.000 | 0.000 | 0.000 | 0.000 | 0.000 | 0.000 | 0.000 | 0.000 | 0.000 | 0.000 | 0.000 | 0.000 | 0.000 | 0.000 | 0.000 | 0.000 | 0.000 | 0.000 | 0.000 |
| E4  | 0.000 | 0.000 | 0.000 | 0.000 | 0.000 | 0.000 | 0.000 | 0.000 | 0.000 | 0.000 | 0.000 | 0.000 | 0.000 | 0.000 | 0.000 | 0.000 | 0.000 | 0.000 | 0.000 | 0.000 |
| E5  | 0.000 | 0.000 | 0.000 | 0.000 | 0.000 | 0.000 | 0.000 | 0.000 | 0.000 | 0.000 | 0.000 | 0.000 | 0.000 | 0.000 | 0.000 | 0.000 | 0.000 | 0.000 | 0.000 | 0.000 |
| E6  | 0.000 | 0.020 | 0.030 | 0.010 | 0.010 | 0.000 | 0.000 | 0.000 | 0.000 | 0.000 | 0.000 | 0.000 | 0.000 | 0.000 | 0.000 | 0.000 | 0.000 | 0.000 | 0.000 | 0.000 |
| E7  | 0.000 | 0.010 | 0.010 | 0.060 | 0.030 | 0.000 | 0.000 | 0.000 | 0.000 | 0.000 | 0.000 | 0.000 | 0.000 | 0.000 | 0.000 | 0.000 | 0.000 | 0.000 | 0.000 | 0.000 |
| E8  | 0.000 | 0.090 | 0.120 | 0.100 | 0.120 | 0.000 | 0.000 | 0.000 | 0.000 | 0.000 | 0.000 | 0.000 | 0.000 | 0.000 | 0.000 | 0.000 | 0.000 | 0.000 | 0.000 | 0.000 |
| E9  | 0.000 | 0.020 | 0.000 | 0.000 | 0.000 | 0.000 | 0.000 | 0.000 | 0.000 | 0.000 | 0.000 | 0.000 | 0.000 | 0.000 | 0.000 | 0.000 | 0.000 | 0.000 | 0.000 | 0.000 |
| E10 | 0.000 | 0.050 | 0.000 | 0.000 | 0.000 | 0.000 | 0.000 | 0.000 | 0.000 | 0.000 | 0.000 | 0.000 | 0.000 | 0.000 | 0.000 | 0.000 | 0.000 | 0.000 | 0.000 | 0.000 |
| E11 | 0.000 | 0.170 | 0.000 | 0.000 | 0.000 | 0.000 | 0.000 | 0.000 | 0.000 | 0.000 | 0.000 | 0.000 | 0.000 | 0.000 | 0.000 | 0.000 | 0.000 | 0.000 | 0.000 | 0.000 |
| E12 | 0.000 | 0.000 | 0.000 | 0.000 | 0.000 | 0.000 | 0.000 | 0.000 | 0.040 | 0.040 | 0.000 | 0.000 | 0.000 | 0.000 | 0.000 | 0.000 | 0.000 | 0.000 | 0.000 | 0.000 |
| E13 | 0.000 | 0.000 | 0.000 | 0.000 | 0.000 | 0.000 | 0.000 | 0.000 | 0.130 | 0.130 | 0.000 | 0.000 | 0.000 | 0.000 | 0.000 | 0.000 | 0.000 | 0.000 | 0.000 | 0.000 |
| E14 | 0.000 | 0.000 | 0.000 | 0.000 | 0.000 | 0.000 | 0.360 | 0.030 | 0.000 | 0.000 | 0.000 | 0.110 | 0.050 | 0.000 | 0.000 | 0.000 | 0.000 | 0.000 | 0.000 | 0.000 |
| E15 | 0.000 | 0.000 | 0.000 | 0.000 | 0.000 | 0.000 | 0.200 | 0.270 | 0.000 | 0.000 | 0.000 | 0.070 | 0.150 | 0.000 | 0.000 | 0.000 | 0.000 | 0.000 | 0.000 | 0.000 |
| E16 | 0.000 | 0.000 | 0.000 | 0.000 | 0.000 | 0.000 | 0.140 | 0.180 | 0.000 | 0.000 | 0.000 | 0.040 | 0.010 | 0.000 | 0.000 | 0.000 | 0.000 | 0.000 | 0.000 | 0.000 |
| E17 | 0.000 | 0.000 | 0.000 | 0.000 | 0.000 | 0.000 | 0.040 | 0.070 | 0.000 | 0.000 | 0.000 | 0.010 | 0.020 | 0.000 | 0.000 | 0.000 | 0.000 | 0.000 | 0.000 | 0.000 |
| E18 | 0.000 | 0.000 | 0.000 | 0.000 | 0.000 | 0.000 | 0.000 | 0.000 | 0.000 | 0.000 | 0.000 | 0.030 | 0.030 | 0.070 | 0.060 | 0.030 | 0.000 | 0.000 | 0.000 | 0.000 |
| E19 | 0.000 | 0.000 | 0.000 | 0.000 | 0.000 | 0.000 | 0.000 | 0.000 | 0.000 | 0.000 | 0.000 | 0.010 | 0.020 | 0.030 | 0.030 | 0.130 | 0.000 | 0.000 | 0.000 | 0.000 |
| E20 | 0.000 | 0.000 | 0.000 | 0.000 | 0.000 | 0.000 | 0.000 | 0.000 | 0.000 | 0.000 | 0.000 | 0.010 | 0.010 | 0.010 | 0.010 | 0.010 | 0.000 | 0.000 | 0.000 | 0.000 |
| E21 | 0.000 | 0.000 | 0.000 | 0.000 | 0.000 | 0.000 | 0.000 | 0.000 | 0.000 | 0.000 | 0.000 | 0.070 | 0.070 | 0.140 | 0.140 | 0.080 | 0.000 | 0.000 | 0.000 | 0.000 |
| E22 | 0.000 | 0.000 | 0.000 | 0.000 | 0.000 | 0.000 | 0.000 | 0.000 | 0.000 | 0.000 | 0.000 | 0.000 | 0.000 | 0.000 | 0.000 | 0.000 | 0.000 | 0.000 | 0.000 | 0.000 |
| E23 | 0.000 | 0.000 | 0.000 | 0.000 | 0.000 | 0.000 | 0.000 | 0.000 | 0.000 | 0.000 | 0.000 | 0.000 | 0.000 | 0.000 | 0.000 | 0.000 | 0.000 | 0.000 | 0.000 | 0.000 |
| E24 | 0.000 | 0.000 | 0.000 | 0.000 | 0.000 | 0.000 | 0.000 | 0.010 | 0.000 | 0.000 | 0.000 | 0.000 | 0.000 | 0.000 | 0.000 | 0.000 | 0.000 | 0.000 | 0.000 | 0.000 |
| E25 | 0.000 | 0.000 | 0.000 | 0.000 | 0.000 | 0.000 | 0.000 | 0.000 | 0.000 | 0.000 | 0.000 | 0.000 | 0.000 | 0.000 | 0.000 | 0.000 | 0.000 | 0.000 | 0.000 | 0.000 |
| E26 | 0.000 | 0.000 | 0.000 | 0.000 | 0.000 | 0.000 | 0.000 | 0.020 | 0.000 | 0.000 | 0.000 | 0.000 | 0.000 | 0.000 | 0.000 | 0.000 | 0.000 | 0.000 | 0.000 | 0.000 |
| E27 | 0.000 | 0.000 | 0.000 | 0.000 | 0.000 | 0.000 | 0.040 | 0.030 | 0.000 | 0.000 | 0.000 | 0.000 | 0.000 | 0.000 | 0.000 | 0.000 | 0.000 | 0.000 | 0.000 | 0.000 |
| E28 | 0.000 | 0.000 | 0.000 | 0.000 | 0.000 | 0.000 | 0.000 | 0.000 | 0.000 | 0.000 | 0.000 | 0.000 | 0.000 | 0.000 | 0.000 | 0.000 | 0.000 | 0.000 | 0.000 | 0.000 |
| E29 | 0.000 | 0.000 | 0.000 | 0.000 | 0.000 | 0.000 | 0.020 | 0.010 | 0.000 | 0.000 | 0.000 | 0.000 | 0.000 | 0.000 | 0.000 | 0.000 | 0.000 | 0.000 | 0.000 | 0.000 |
| E30 | 0.000 | 0.000 | 0.000 | 0.000 | 0.000 | 0.000 | 0.040 | 0.030 | 0.000 | 0.000 | 0.000 | 0.000 | 0.000 | 0.000 | 0.000 | 0.000 | 0.000 | 0.000 | 0.000 | 0.000 |
| E31 | 0.000 | 0.000 | 0.000 | 0.000 | 0.000 | 0.000 | 0.020 | 0.020 | 0.000 | 0.000 | 0.000 | 0.000 | 0.000 | 0.000 | 0.000 | 0.000 | 0.000 | 0.000 | 0.000 | 0.000 |
| E32 | 0.000 | 0.000 | 0.000 | 0.000 | 0.000 | 0.000 | 0.010 | 0.010 | 0.000 | 0.000 | 0.000 | 0.000 | 0.000 | 0.000 | 0.000 | 0.000 | 0.000 | 0.000 | 0.000 | 0.000 |
| E33 | 0.000 | 0.000 | 0.000 | 0.000 | 0.000 | 0.000 | 0.010 | 0.010 | 0.000 | 0.000 | 0.000 | 0.000 | 0.000 | 0.000 | 0.000 | 0.000 | 0.000 | 0.000 | 0.000 | 0.000 |
| E34 | 0.000 | 0.000 | 0.000 | 0.000 | 0.000 | 0.000 | 0.040 | 0.040 | 0.000 | 0.000 | 0.000 | 0.000 | 0.000 | 0.000 | 0.000 | 0.000 | 0.000 | 0.000 | 0.000 | 0.000 |
| E35 | 0.620 | 0.130 | 0.460 | 0.210 | 0.100 | 0.650 | 0.050 | 0.060 | 0.220 | 0.450 | 0.120 | 0.420 | 0.060 | 0.440 | 0.120 | 0.090 | 0.300 | 0.650 | 0.190 | 0.310 |
| E36 | 0.290 | 0.470 | 0.200 | 0.130 | 0.060 | 0.230 | 0.030 | 0.160 | 0.530 | 0.250 | 0.230 | 0.080 | 0.460 | 0.250 | 0.400 | 0.150 | 0.160 | 0.230 | 0.720 | 0.110 |
| E37 | 0.090 | 0.050 | 0.180 | 0.490 | 0.670 | 0.120 | 0.020 | 0.030 | 0.090 | 0.140 | 0.650 | 0.150 | 0.130 | 0.060 | 0.220 | 0.510 | 0.540 | 0.120 | 0.080 | 0.580 |

Table S73. Case 20. Original Weighted Supermatrix and Priorities (continued).

|     | E21   | E22   | E23   | E24   | E25   | E26   | E27   | E28   | E29   | E30   | E31   | E32   | E33   | E34   | E35   | E36   | E37   | Priorities |
|-----|-------|-------|-------|-------|-------|-------|-------|-------|-------|-------|-------|-------|-------|-------|-------|-------|-------|------------|
| E1  | 0.000 | 0.000 | 0.000 | 0.000 | 0.000 | 0.000 | 0.000 | 0.000 | 0.000 | 0.000 | 0.000 | 0.000 | 0.000 | 0.000 | 0.020 | 0.040 | 0.000 | 0.010      |
| E2  | 0.000 | 0.000 | 0.000 | 0.000 | 0.000 | 0.000 | 0.000 | 0.000 | 0.000 | 0.000 | 0.000 | 0.000 | 0.000 | 0.000 | 0.010 | 0.130 | 0.000 | 0.020      |
| E3  | 0.000 | 0.000 | 0.000 | 0.000 | 0.000 | 0.000 | 0.000 | 0.000 | 0.000 | 0.000 | 0.000 | 0.000 | 0.000 | 0.000 | 0.030 | 0.060 | 0.010 | 0.010      |
| E4  | 0.000 | 0.000 | 0.000 | 0.000 | 0.000 | 0.000 | 0.000 | 0.000 | 0.000 | 0.000 | 0.000 | 0.000 | 0.000 | 0.000 | 0.000 | 0.020 | 0.010 | 0.000      |
| E5  | 0.000 | 0.000 | 0.000 | 0.000 | 0.000 | 0.000 | 0.000 | 0.000 | 0.000 | 0.000 | 0.000 | 0.000 | 0.000 | 0.000 | 0.000 | 0.010 | 0.020 | 0.000      |
| E6  | 0.000 | 0.000 | 0.000 | 0.000 | 0.000 | 0.000 | 0.000 | 0.000 | 0.000 | 0.000 | 0.000 | 0.000 | 0.000 | 0.000 | 0.010 | 0.050 | 0.000 | 0.010      |
| E7  | 0.000 | 0.000 | 0.000 | 0.000 | 0.000 | 0.000 | 0.000 | 0.000 | 0.000 | 0.000 | 0.000 | 0.000 | 0.000 | 0.000 | 0.000 | 0.020 | 0.000 | 0.000      |
| E8  | 0.000 | 0.000 | 0.000 | 0.000 | 0.000 | 0.000 | 0.000 | 0.000 | 0.000 | 0.000 | 0.000 | 0.000 | 0.000 | 0.000 | 0.000 | 0.190 | 0.010 | 0.030      |
| E9  | 0.000 | 0.000 | 0.000 | 0.000 | 0.000 | 0.000 | 0.000 | 0.000 | 0.000 | 0.000 | 0.000 | 0.000 | 0.000 | 0.000 | 0.040 | 0.110 | 0.010 | 0.020      |
| E10 | 0.000 | 0.000 | 0.000 | 0.000 | 0.000 | 0.000 | 0.000 | 0.000 | 0.000 | 0.000 | 0.000 | 0.000 | 0.000 | 0.000 | 0.070 | 0.050 | 0.000 | 0.020      |
| E11 | 0.000 | 0.000 | 0.000 | 0.000 | 0.000 | 0.000 | 0.000 | 0.000 | 0.000 | 0.000 | 0.000 | 0.000 | 0.000 | 0.000 | 0.010 | 0.020 | 0.010 | 0.010      |
| E12 | 0.000 | 0.000 | 0.000 | 0.000 | 0.000 | 0.000 | 0.000 | 0.000 | 0.000 | 0.000 | 0.000 | 0.000 | 0.000 | 0.000 | 0.190 | 0.020 | 0.090 | 0.050      |
| E13 | 0.000 | 0.000 | 0.000 | 0.000 | 0.000 | 0.000 | 0.000 | 0.000 | 0.000 | 0.000 | 0.000 | 0.000 | 0.000 | 0.000 | 0.060 | 0.080 | 0.040 | 0.030      |
| E14 | 0.000 | 0.000 | 0.000 | 0.000 | 0.000 | 0.000 | 0.000 | 0.000 | 0.000 | 0.000 | 0.000 | 0.000 | 0.000 | 0.000 | 0.120 | 0.030 | 0.000 | 0.030      |
| E15 | 0.000 | 0.000 | 0.000 | 0.000 | 0.000 | 0.000 | 0.000 | 0.000 | 0.000 | 0.000 | 0.000 | 0.000 | 0.000 | 0.000 | 0.080 | 0.050 | 0.020 | 0.040      |
| E16 | 0.000 | 0.000 | 0.000 | 0.000 | 0.000 | 0.000 | 0.000 | 0.000 | 0.000 | 0.000 | 0.000 | 0.000 | 0.000 | 0.000 | 0.030 | 0.010 | 0.040 | 0.020      |
| E17 | 0.000 | 0.000 | 0.000 | 0.000 | 0.000 | 0.000 | 0.000 | 0.000 | 0.000 | 0.000 | 0.000 | 0.000 | 0.000 | 0.000 | 0.020 | 0.010 | 0.010 | 0.010      |
| E18 | 0.000 | 0.000 | 0.000 | 0.000 | 0.000 | 0.000 | 0.000 | 0.000 | 0.000 | 0.000 | 0.000 | 0.000 | 0.000 | 0.000 | 0.090 | 0.020 | 0.000 | 0.030      |
| E19 | 0.000 | 0.000 | 0.000 | 0.000 | 0.000 | 0.000 | 0.000 | 0.000 | 0.000 | 0.000 | 0.000 | 0.000 | 0.000 | 0.000 | 0.070 | 0.030 | 0.010 | 0.020      |
| E20 | 0.000 | 0.000 | 0.000 | 0.000 | 0.000 | 0.000 | 0.000 | 0.000 | 0.000 | 0.000 | 0.000 | 0.000 | 0.000 | 0.000 | 0.030 | 0.000 | 0.020 | 0.010      |
| E21 | 0.000 | 0.000 | 0.000 | 0.000 | 0.000 | 0.000 | 0.000 | 0.000 | 0.000 | 0.000 | 0.000 | 0.000 | 0.000 | 0.000 | 0.010 | 0.000 | 0.010 | 0.020      |
| E22 | 0.000 | 0.000 | 0.170 | 0.170 | 0.170 | 0.170 | 0.170 | 0.170 | 0.170 | 0.170 | 0.170 | 0.170 | 0.170 | 0.170 | 0.030 | 0.020 | 0.220 | 0.050      |
| E23 | 0.000 | 0.070 | 0.000 | 0.000 | 0.000 | 0.000 | 0.000 | 0.000 | 0.000 | 0.000 | 0.000 | 0.000 | 0.000 | 0.000 | 0.020 | 0.010 | 0.080 | 0.020      |
| E24 | 0.000 | 0.030 | 0.000 | 0.000 | 0.000 | 0.000 | 0.000 | 0.000 | 0.000 | 0.000 | 0.000 | 0.000 | 0.000 | 0.000 | 0.010 | 0.000 | 0.110 | 0.020      |
| E25 | 0.000 | 0.010 | 0.000 | 0.000 | 0.000 | 0.000 | 0.000 | 0.000 | 0.000 | 0.000 | 0.000 | 0.000 | 0.000 | 0.000 | 0.000 | 0.000 | 0.010 | 0.000      |
| E26 | 0.000 | 0.010 | 0.000 | 0.000 | 0.000 | 0.000 | 0.000 | 0.000 | 0.000 | 0.000 | 0.000 | 0.000 | 0.000 | 0.000 | 0.000 | 0.010 | 0.020 | 0.010      |
| E27 | 0.000 | 0.020 | 0.000 | 0.000 | 0.000 | 0.000 | 0.000 | 0.000 | 0.000 | 0.000 | 0.000 | 0.000 | 0.000 | 0.000 | 0.000 | 0.010 | 0.020 | 0.010      |
| E28 | 0.000 | 0.050 | 0.000 | 0.000 | 0.000 | 0.000 | 0.000 | 0.000 | 0.000 | 0.000 | 0.000 | 0.000 | 0.000 | 0.000 | 0.010 | 0.010 | 0.700 | 0.010      |
| E29 | 0.000 | 0.020 | 0.000 | 0.000 | 0.000 | 0.000 | 0.000 | 0.000 | 0.000 | 0.000 | 0.000 | 0.000 | 0.000 | 0.000 | 0.000 | 0.000 | 0.040 | 0.010      |
| E30 | 0.000 | 0.060 | 0.000 | 0.000 | 0.000 | 0.000 | 0.000 | 0.000 | 0.000 | 0.000 | 0.000 | 0.000 | 0.000 | 0.000 | 0.010 | 0.000 | 0.020 | 0.010      |
| E31 | 0.000 | 0.050 | 0.000 | 0.000 | 0.000 | 0.000 | 0.000 | 0.000 | 0.000 | 0.000 | 0.000 | 0.000 | 0.000 | 0.000 | 0.000 | 0.000 | 0.030 | 0.010      |
| E32 | 0.000 | 0.010 | 0.000 | 0.000 | 0.000 | 0.000 | 0.000 | 0.000 | 0.000 | 0.000 | 0.000 | 0.000 | 0.000 | 0.000 | 0.000 | 0.000 | 0.010 | 0.000      |
| E33 | 0.000 | 0.010 | 0.000 | 0.000 | 0.000 | 0.000 | 0.000 | 0.000 | 0.000 | 0.000 | 0.000 | 0.000 | 0.000 | 0.000 | 0.000 | 0.000 | 0.000 | 0.000      |
| E34 | 0.000 | 0.010 | 0.000 | 0.000 | 0.000 | 0.000 | 0.000 | 0.000 | 0.000 | 0.000 | 0.000 | 0.000 | 0.000 | 0.000 | 0.000 | 0.000 | 0.030 | 0.010      |
| E35 | 0.240 | 0.470 | 0.520 | 0.160 | 0.190 | 0.150 | 0.260 | 0.660 | 0.210 | 0.140 | 0.100 | 0.060 | 0.000 | 0.000 | 0.000 | 0.000 | 0.000 | 0.170      |
| E36 | 0.140 | 0.130 | 0.200 | 0.070 | 0.540 | 0.060 | 0.090 | 0.110 | 0.080 | 0.080 | 0.190 | 0.110 | 0.000 | 0.000 | 0.000 | 0.000 | 0.000 | 0.140      |
| E37 | 0.620 | 0.050 | 0.110 | 0.600 | 0.100 | 0.620 | 0.480 | 0.060 | 0.540 | 0.610 | 0.540 | 0.660 | 0.000 | 0.000 | 0.000 | 0.000 | 0.000 | 0.130      |

Table S74. Case 20's X Influence Matrix.

|     | E1 | E2 | E3 | E4 | E5 | E6 | E7 | E8 | E9 | E10 | E11 | E12 | E13 | E14 | E15 | E16 | E17 | E18 | E19 | E20 |
|-----|----|----|----|----|----|----|----|----|----|-----|-----|-----|-----|-----|-----|-----|-----|-----|-----|-----|
| E1  | 0  | 0  | 0  | 0  | 0  | 0  | 0  | 0  | 0  | 0   | 0   | 0   | 0   | 0   | 0   | 0   | 0   | 0   | 0   | 0   |
| E2  | 0  | 0  | 0  | 0  | 0  | 0  | 0  | 0  | 0  | 0   | 0   | 0   | 0   | 0   | 0   | 0   | 0   | 0   | 0   | 0   |
| E3  | 0  | 0  | 0  | 0  | 0  | 0  | 0  | 0  | 0  | 0   | 0   | 0   | 0   | 0   | 0   | 0   | 0   | 0   | 0   | 0   |
| E4  | 0  | 0  | 0  | 0  | 0  | 0  | 0  | 0  | 0  | 0   | 0   | 0   | 0   | 0   | 0   | 0   | 0   | 0   | 0   | 0   |
| E5  | 0  | 0  | 0  | 0  | 0  | 0  | 0  | 0  | 0  | 0   | 0   | 0   | 0   | 0   | 0   | 0   | 0   | 0   | 0   | 0   |
| E6  | 0  | 0  | 0  | 0  | 0  | 0  | 0  | 0  | 0  | 0   | 0   | 0   | 0   | 0   | 0   | 0   | 0   | 0   | 0   | 0   |
| E7  | 0  | 0  | 0  | 0  | 0  | 0  | 0  | 0  | 0  | 0   | 0   | 0   | 0   | 0   | 0   | 0   | 0   | 0   | 0   | 0   |
| E8  | 0  | 0  | 1  | 1  | 0  | 0  | 0  | 0  | 0  | 0   | 0   | 0   | 0   | 0   | 0   | 0   | 0   | 0   | 0   | 0   |
| E9  | 0  | 0  | 0  | 0  | 0  | 0  | 0  | 0  | 0  | 0   | 0   | 0   | 0   | 0   | 0   | 0   | 0   | 0   | 0   | 0   |
| E10 | 0  | 0  | 0  | 0  | 0  | 0  | 0  | 0  | 0  | 0   | 0   | 0   | 0   | 0   | 0   | 0   | 0   | 0   | 0   | 0   |
| E11 | 0  | 1  | 0  | 0  | 0  | 0  | 0  | 0  | 0  | 0   | 0   | 0   | 0   | 0   | 0   | 0   | 0   | 0   | 0   | 0   |
| E12 | 0  | 0  | 0  | 0  | 0  | 0  | 0  | 0  | 0  | 0   | 0   | 0   | 0   | 0   | 0   | 0   | 0   | 0   | 0   | 0   |
| E13 | 0  | 0  | 0  | 0  | 0  | 0  | 0  | 0  | 1  | 1   | 0   | 0   | 0   | 0   | 0   | 0   | 0   | 0   | 0   | 0   |
| E14 | 0  | 0  | 0  | 0  | 0  | 0  | 4  | 0  | 0  | 0   | 0   | 1   | 0   | 0   | 0   | 0   | 0   | 0   | 0   | 0   |
| E15 | 0  | 0  | 0  | 0  | 0  | 0  | 2  | 4  | 0  | 0   | 0   | 0   | 1   | 0   | 0   | 0   | 0   | 0   | 0   | 0   |
| E16 | 0  | 0  | 0  | 0  | 0  | 0  | 1  | 3  | 0  | 0   | 0   | 0   | 0   | 0   | 0   | 0   | 0   | 0   | 0   | 0   |
| E17 | 0  | 0  | 0  | 0  | 0  | 0  | 0  | 1  | 0  | 0   | 0   | 0   | 0   | 0   | 0   | 0   | 0   | 0   | 0   | 0   |
| E18 | 0  | 0  | 0  | 0  | 0  | 0  | 0  | 0  | 0  | 0   | 0   | 0   | 0   | 0   | 0   | 0   | 0   | 0   | 0   | 0   |
| E19 | 0  | 0  | 0  | 0  | 0  | 0  | 0  | 0  | 0  | 0   | 0   | 0   | 0   | 0   | 0   | 1   | 0   | 0   | 0   | 0   |
| E20 | 0  | 0  | 0  | 0  | 0  | 0  | 0  | 0  | 0  | 0   | 0   | 0   | 0   | 0   | 0   | 0   | 0   | 0   | 0   | 0   |
| E21 | 0  | 0  | 0  | 0  | 0  | 0  | 0  | 0  | 0  | 0   | 0   | 0   | 0   | 1   | 1   | 0   | 0   | 0   | 0   | 0   |
| E22 | 0  | 0  | 0  | 0  | 0  | 0  | 0  | 0  | 0  | 0   | 0   | 0   | 0   | 0   | 0   | 0   | 0   | 0   | 0   | 0   |
| E23 | 0  | 0  | 0  | 0  | 0  | 0  | 0  | 0  | 0  | 0   | 0   | 0   | 0   | 0   | 0   | 0   | 0   | 0   | 0   | 0   |
| E24 | 0  | 0  | 0  | 0  | 0  | 0  | 0  | 0  | 0  | 0   | 0   | 0   | 0   | 0   | 0   | 0   | 0   | 0   | 0   | 0   |
| E25 | 0  | 0  | 0  | 0  | 0  | 0  | 0  | 0  | 0  | 0   | 0   | 0   | 0   | 0   | 0   | 0   | 0   | 0   | 0   | 0   |
| E26 | 0  | 0  | 0  | 0  | 0  | 0  | 0  | 0  | 0  | 0   | 0   | 0   | 0   | 0   | 0   | 0   | 0   | 0   | 0   | 0   |
| E27 | 0  | 0  | 0  | 0  | 0  | 0  | 0  | 0  | 0  | 0   | 0   | 0   | 0   | 0   | 0   | 0   | 0   | 0   | 0   | 0   |
| E28 | 0  | 0  | 0  | 0  | 0  | 0  | 0  | 0  | 0  | 0   | 0   | 0   | 0   | 0   | 0   | 0   | 0   | 0   | 0   | 0   |
| E29 | 0  | 0  | 0  | 0  | 0  | 0  | 0  | 0  | 0  | 0   | 0   | 0   | 0   | 0   | 0   | 0   | 0   | 0   | 0   | 0   |
| E30 | 0  | 0  | 0  | 0  | 0  | 0  | 0  | 0  | 0  | 0   | 0   | 0   | 0   | 0   | 0   | 0   | 0   | 0   | 0   | 0   |
| E31 | 0  | 0  | 0  | 0  | 0  | 0  | 0  | 0  | 0  | 0   | 0   | 0   | 0   | 0   | 0   | 0   | 0   | 0   | 0   | 0   |
| E32 | 0  | 0  | 0  | 0  | 0  | 0  | 0  | 0  | 0  | 0   | 0   | 0   | 0   | 0   | 0   | 0   | 0   | 0   | 0   | 0   |
| E33 | 0  | 0  | 0  | 0  | 0  | 0  | 0  | 0  | 0  | 0   | 0   | 0   | 0   | 0   | 0   | 0   | 0   | 0   | 0   | 0   |
| E34 | 0  | 0  | 0  | 0  | 0  | 0  | 0  | 0  | 0  | 0   | 0   | 0   | 0   | 0   | 0   | 0   | 0   | 0   | 0   | 0   |
| E35 | 4  | 1  | 4  | 2  | 0  | 4  | 0  | 1  | 2  | 4   | 0   | 4   | 0   | 4   | 1   | 0   | 2   | 4   | 1   | 2   |
| E36 | 2  | 4  | 2  | 1  | 0  | 1  | 0  | 2  | 4  | 2   | 1   | 0   | 4   | 2   | 4   | 1   | 1   | 1   | 4   | 0   |
| E37 | 0  | 0  | 1  | 4  | 4  | 0  | 0  | 0  | 0  | 1   | 4   | 1   | 1   | 0   | 2   | 4   | 4   | 0   | 0   | 4   |

Table S74. Case 20's X Influence Matrix (continued).

|     | E21 | E22 | E23 | E24 | E25 | E26 | E27 | E28 | E29 | E30 | E31 | E32 | E33 | E34 | E35 | E36 | E37 |
|-----|-----|-----|-----|-----|-----|-----|-----|-----|-----|-----|-----|-----|-----|-----|-----|-----|-----|
| E1  | 0   | 0   | 0   | 0   | 0   | 0   | 0   | 0   | 0   | 0   | 0   | 0   | 0   | 0   | 0   | 1   | 0   |
| E2  | 0   | 0   | 0   | 0   | 0   | 0   | 0   | 0   | 0   | 0   | 0   | 0   | 0   | 0   | 0   | 3   | 0   |
| E3  | 0   | 0   | 0   | 0   | 0   | 0   | 0   | 0   | 0   | 0   | 0   | 0   | 0   | 0   | 0   | 1   | 0   |
| E4  | 0   | 0   | 0   | 0   | 0   | 0   | 0   | 0   | 0   | 0   | 0   | 0   | 0   | 0   | 0   | 0   | 0   |
| E5  | 0   | 0   | 0   | 0   | 0   | 0   | 0   | 0   | 0   | 0   | 0   | 0   | 0   | 0   | 0   | 0   | 0   |
| E6  | 0   | 0   | 0   | 0   | 0   | 0   | 0   | 0   | 0   | 0   | 0   | 0   | 0   | 0   | 0   | 1   | 0   |
| E7  | 0   | 0   | 0   | 0   | 0   | 0   | 0   | 0   | 0   | 0   | 0   | 0   | 0   | 0   | 0   | 0   | 0   |
| E8  | 0   | 0   | 0   | 0   | 0   | 0   | 0   | 0   | 0   | 0   | 0   | 0   | 0   | 0   | 0   | 4   | 0   |
| E9  | 0   | 0   | 0   | 0   | 0   | 0   | 0   | 0   | 0   | 0   | 0   | 0   | 0   | 0   | 1   | 2   | 0   |
| E10 | 0   | 0   | 0   | 0   | 0   | 0   | 0   | 0   | 0   | 0   | 0   | 0   | 0   | 0   | 1   | 1   | 0   |
| E11 | 0   | 0   | 0   | 0   | 0   | 0   | 0   | 0   | 0   | 0   | 0   | 0   | 0   | 0   | 0   | 0   | 0   |
| E12 | 0   | 0   | 0   | 0   | 0   | 0   | 0   | 0   | 0   | 0   | 0   | 0   | 0   | 0   | 4   | 0   | 0   |
| E13 | 0   | 0   | 0   | 0   | 0   | 0   | 0   | 0   | 0   | 0   | 0   | 0   | 0   | 0   | 1   | 2   | 0   |
| E14 | 0   | 0   | 0   | 0   | 0   | 0   | 0   | 0   | 0   | 0   | 0   | 0   | 0   | 0   | 3   | 0   | 0   |
| E15 | 0   | 0   | 0   | 0   | 0   | 0   | 0   | 0   | 0   | 0   | 0   | 0   | 0   | 0   | 2   | 1   | 0   |
| E16 | 0   | 0   | 0   | 0   | 0   | 0   | 0   | 0   | 0   | 0   | 0   | 0   | 0   | 0   | 0   | 0   | 0   |
| E17 | 0   | 0   | 0   | 0   | 0   | 0   | 0   | 0   | 0   | 0   | 0   | 0   | 0   | 0   | 0   | 0   | 0   |
| E18 | 0   | 0   | 0   | 0   | 0   | 0   | 0   | 0   | 0   | 0   | 0   | 0   | 0   | 0   | 2   | 0   | 0   |
| E19 | 0   | 0   | 0   | 0   | 0   | 0   | 0   | 0   | 0   | 0   | 0   | 0   | 0   | 0   | 1   | 0   | 0   |
| E20 | 0   | 0   | 0   | 0   | 0   | 0   | 0   | 0   | 0   | 0   | 0   | 0   | 0   | 0   | 0   | 0   | 0   |
| E21 | 0   | 0   | 0   | 0   | 0   | 0   | 0   | 0   | 0   | 0   | 0   | 0   | 0   | 0   | 0   | 0   | 0   |
| E22 | 0   | 0   | 1   | 1   | 1   | 1   | 1   | 1   | 1   | 1   | 1   | 1   | 4   | 4   | 0   | 0   | 1   |
| E23 | 0   | 0   | 0   | 0   | 0   | 0   | 0   | 0   | 0   | 0   | 0   | 0   | 0   | 0   | 0   | 0   | 0   |
| E24 | 0   | 0   | 0   | 0   | 0   | 0   | 0   | 0   | 0   | 0   | 0   | 0   | 0   | 0   | 0   | 0   | 0   |
| E25 | 0   | 0   | 0   | 0   | 0   | 0   | 0   | 0   | 0   | 0   | 0   | 0   | 0   | 0   | 0   | 0   | 0   |
| E26 | 0   | 0   | 0   | 0   | 0   | 0   | 0   | 0   | 0   | 0   | 0   | 0   | 0   | 0   | 0   | 0   | 0   |
| E27 | 0   | 0   | 0   | 0   | 0   | 0   | 0   | 0   | 0   | 0   | 0   | 0   | 0   | 0   | 0   | 0   | 0   |
| E28 | 0   | 0   | 0   | 0   | 0   | 0   | 0   | 0   | 0   | 0   | 0   | 0   | 0   | 0   | 0   | 0   | 4   |
| E29 | 0   | 0   | 0   | 0   | 0   | 0   | 0   | 0   | 0   | 0   | 0   | 0   | 0   | 0   | 0   | 0   | 0   |
| E30 | 0   | 0   | 0   | 0   | 0   | 0   | 0   | 0   | 0   | 0   | 0   | 0   | 0   | 0   | 0   | 0   | 0   |
| E31 | 0   | 0   | 0   | 0   | 0   | 0   | 0   | 0   | 0   | 0   | 0   | 0   | 0   | 0   | 0   | 0   | 0   |
| E32 | 0   | 0   | 0   | 0   | 0   | 0   | 0   | 0   | 0   | 0   | 0   | 0   | 0   | 0   | 0   | 0   | 0   |
| E33 | 0   | 0   | 0   | 0   | 0   | 0   | 0   | 0   | 0   | 0   | 0   | 0   | 0   | 0   | 0   | 0   | 0   |
| E34 | 0   | 0   | 0   | 0   | 0   | 0   | 0   | 0   | 0   | 0   | 0   | 0   | 0   | 0   | 0   | 0   | 0   |
| E35 | 1   | 4   | 4   | 1   | 1   | 1   | 2   | 4   | 1   | 1   | 0   | 0   | 0   | 0   | 0   | 0   | 0   |
| E36 | 1   | 1   | 1   | 0   | 4   | 0   | 0   | 0   | 0   | 0   | 1   | 0   | 0   | 0   | 0   | 0   | 0   |
| E37 | 4   | 0   | 1   | 4   | 0   | 4   | 4   | 0   | 4   | 4   | 4   | 4   | 0   | 0   | 0   | 0   | 0   |

Table S75. Case 20. Weighted Supermatrix and Priorities, according to procedure 1.

[illegible]

Table S75. Case 20. Weighted Supermatrix and Priorities, according to procedure 1 (continued).

|     | E21   | E22   | E23   | E24   | E25   | E26   | E27   | E28   | E29   | E30   | E31   | E32   | E33   | E34   | E35   | E36   | E37   | Priorities |
|-----|-------|-------|-------|-------|-------|-------|-------|-------|-------|-------|-------|-------|-------|-------|-------|-------|-------|------------|
| E1  | 0.000 | 0.000 | 0.000 | 0.000 | 0.000 | 0.000 | 0.000 | 0.000 | 0.000 | 0.000 | 0.000 | 0.000 | 0.000 | 0.000 | 0.000 | 0.040 | 0.000 | 0.006      |
| E2  | 0.000 | 0.000 | 0.000 | 0.000 | 0.000 | 0.000 | 0.000 | 0.000 | 0.000 | 0.000 | 0.000 | 0.000 | 0.000 | 0.000 | 0.000 | 0.214 | 0.000 | 0.034      |
| E3  | 0.000 | 0.000 | 0.000 | 0.000 | 0.000 | 0.000 | 0.000 | 0.000 | 0.000 | 0.000 | 0.000 | 0.000 | 0.000 | 0.000 | 0.000 | 0.040 | 0.000 | 0.006      |
| E4  | 0.000 | 0.000 | 0.000 | 0.000 | 0.000 | 0.000 | 0.000 | 0.000 | 0.000 | 0.000 | 0.000 | 0.000 | 0.000 | 0.000 | 0.000 | 0.000 | 0.000 | 0.000      |
| E5  | 0.000 | 0.000 | 0.000 | 0.000 | 0.000 | 0.000 | 0.000 | 0.000 | 0.000 | 0.000 | 0.000 | 0.000 | 0.000 | 0.000 | 0.000 | 0.000 | 0.000 | 0.000      |
| E6  | 0.000 | 0.000 | 0.000 | 0.000 | 0.000 | 0.000 | 0.000 | 0.000 | 0.000 | 0.000 | 0.000 | 0.000 | 0.000 | 0.000 | 0.000 | 0.040 | 0.000 | 0.006      |
| E7  | 0.000 | 0.000 | 0.000 | 0.000 | 0.000 | 0.000 | 0.000 | 0.000 | 0.000 | 0.000 | 0.000 | 0.000 | 0.000 | 0.000 | 0.000 | 0.000 | 0.000 | 0.000      |
| E8  | 0.000 | 0.000 | 0.000 | 0.000 | 0.000 | 0.000 | 0.000 | 0.000 | 0.000 | 0.000 | 0.000 | 0.000 | 0.000 | 0.000 | 0.000 | 0.378 | 0.000 | 0.060      |
| E9  | 0.000 | 0.000 | 0.000 | 0.000 | 0.000 | 0.000 | 0.000 | 0.000 | 0.000 | 0.000 | 0.000 | 0.000 | 0.000 | 0.000 | 0.041 | 0.104 | 0.000 | 0.026      |
| E10 | 0.000 | 0.000 | 0.000 | 0.000 | 0.000 | 0.000 | 0.000 | 0.000 | 0.000 | 0.000 | 0.000 | 0.000 | 0.000 | 0.000 | 0.041 | 0.040 | 0.000 | 0.016      |
| E11 | 0.000 | 0.000 | 0.000 | 0.000 | 0.000 | 0.000 | 0.000 | 0.000 | 0.000 | 0.000 | 0.000 | 0.000 | 0.000 | 0.000 | 0.000 | 0.000 | 0.000 | 0.004      |
| E12 | 0.000 | 0.000 | 0.000 | 0.000 | 0.000 | 0.000 | 0.000 | 0.000 | 0.000 | 0.000 | 0.000 | 0.000 | 0.000 | 0.000 | 0.402 | 0.000 | 0.000 | 0.098      |
| E13 | 0.000 | 0.000 | 0.000 | 0.000 | 0.000 | 0.000 | 0.000 | 0.000 | 0.000 | 0.000 | 0.000 | 0.000 | 0.000 | 0.000 | 0.041 | 0.104 | 0.000 | 0.030      |
| E14 | 0.000 | 0.000 | 0.000 | 0.000 | 0.000 | 0.000 | 0.000 | 0.000 | 0.000 | 0.000 | 0.000 | 0.000 | 0.000 | 0.000 | 0.222 | 0.000 | 0.000 | 0.065      |
| E15 | 0.000 | 0.000 | 0.000 | 0.000 | 0.000 | 0.000 | 0.000 | 0.000 | 0.000 | 0.000 | 0.000 | 0.000 | 0.000 | 0.000 | 0.105 | 0.040 | 0.000 | 0.066      |
| E16 | 0.000 | 0.000 | 0.000 | 0.000 | 0.000 | 0.000 | 0.000 | 0.000 | 0.000 | 0.000 | 0.000 | 0.000 | 0.000 | 0.000 | 0.000 | 0.000 | 0.000 | 0.015      |
| E17 | 0.000 | 0.000 | 0.000 | 0.000 | 0.000 | 0.000 | 0.000 | 0.000 | 0.000 | 0.000 | 0.000 | 0.000 | 0.000 | 0.000 | 0.000 | 0.000 | 0.000 | 0.003      |
| E18 | 0.000 | 0.000 | 0.000 | 0.000 | 0.000 | 0.000 | 0.000 | 0.000 | 0.000 | 0.000 | 0.000 | 0.000 | 0.000 | 0.000 | 0.105 | 0.000 | 0.000 | 0.026      |
| E19 | 0.000 | 0.000 | 0.000 | 0.000 | 0.000 | 0.000 | 0.000 | 0.000 | 0.000 | 0.000 | 0.000 | 0.000 | 0.000 | 0.000 | 0.041 | 0.000 | 0.000 | 0.012      |
| E20 | 0.000 | 0.000 | 0.000 | 0.000 | 0.000 | 0.000 | 0.000 | 0.000 | 0.000 | 0.000 | 0.000 | 0.000 | 0.000 | 0.000 | 0.000 | 0.000 | 0.000 | 0.000      |
| E21 | 0.000 | 0.000 | 0.000 | 0.000 | 0.000 | 0.000 | 0.000 | 0.000 | 0.000 | 0.000 | 0.000 | 0.000 | 0.000 | 0.000 | 0.000 | 0.000 | 0.000 | 0.010      |
| E22 | 0.000 | 0.000 | 0.100 | 0.111 | 0.111 | 0.111 | 0.081 | 0.125 | 0.111 | 0.111 | 0.111 | 0.125 | 1.000 | 1.000 | 0.000 | 0.000 | 0.125 | 0.013      |
| E23 | 0.000 | 0.000 | 0.000 | 0.000 | 0.000 | 0.000 | 0.000 | 0.000 | 0.000 | 0.000 | 0.000 | 0.000 | 0.000 | 0.000 | 0.000 | 0.000 | 0.000 | 0.000      |
| E24 | 0.000 | 0.000 | 0.000 | 0.000 | 0.000 | 0.000 | 0.000 | 0.000 | 0.000 | 0.000 | 0.000 | 0.000 | 0.000 | 0.000 | 0.000 | 0.000 | 0.000 | 0.000      |
| E25 | 0.000 | 0.000 | 0.000 | 0.000 | 0.000 | 0.000 | 0.000 | 0.000 | 0.000 | 0.000 | 0.000 | 0.000 | 0.000 | 0.000 | 0.000 | 0.000 | 0.000 | 0.000      |
| E26 | 0.000 | 0.000 | 0.000 | 0.000 | 0.000 | 0.000 | 0.000 | 0.000 | 0.000 | 0.000 | 0.000 | 0.000 | 0.000 | 0.000 | 0.000 | 0.000 | 0.000 | 0.000      |
| E27 | 0.000 | 0.000 | 0.000 | 0.000 | 0.000 | 0.000 | 0.000 | 0.000 | 0.000 | 0.000 | 0.000 | 0.000 | 0.000 | 0.000 | 0.000 | 0.000 | 0.000 | 0.000      |
| E28 | 0.000 | 0.000 | 0.000 | 0.000 | 0.000 | 0.000 | 0.000 | 0.000 | 0.000 | 0.000 | 0.000 | 0.000 | 0.000 | 0.000 | 0.000 | 0.000 | 0.875 | 0.047      |
| E29 | 0.000 | 0.000 | 0.000 | 0.000 | 0.000 | 0.000 | 0.000 | 0.000 | 0.000 | 0.000 | 0.000 | 0.000 | 0.000 | 0.000 | 0.000 | 0.000 | 0.000 | 0.000      |
| E30 | 0.000 | 0.000 | 0.000 | 0.000 | 0.000 | 0.000 | 0.000 | 0.000 | 0.000 | 0.000 | 0.000 | 0.000 | 0.000 | 0.000 | 0.000 | 0.000 | 0.000 | 0.000      |
| E31 | 0.000 | 0.000 | 0.000 | 0.000 | 0.000 | 0.000 | 0.000 | 0.000 | 0.000 | 0.000 | 0.000 | 0.000 | 0.000 | 0.000 | 0.000 | 0.000 | 0.000 | 0.000      |
| E32 | 0.000 | 0.000 | 0.000 | 0.000 | 0.000 | 0.000 | 0.000 | 0.000 | 0.000 | 0.000 | 0.000 | 0.000 | 0.000 | 0.000 | 0.000 | 0.000 | 0.000 | 0.000      |
| E33 | 0.000 | 0.000 | 0.000 | 0.000 | 0.000 | 0.000 | 0.000 | 0.000 | 0.000 | 0.000 | 0.000 | 0.000 | 0.000 | 0.000 | 0.000 | 0.000 | 0.000 | 0.000      |
| E34 | 0.000 | 0.000 | 0.000 | 0.000 | 0.000 | 0.000 | 0.000 | 0.000 | 0.000 | 0.000 | 0.000 | 0.000 | 0.000 | 0.000 | 0.000 | 0.000 | 0.000 | 0.000      |
| E35 | 0.111 | 0.875 | 0.700 | 0.111 | 0.111 | 0.111 | 0.188 | 0.875 | 0.111 | 0.111 | 0.000 | 0.000 | 0.000 | 0.000 | 0.000 | 0.000 | 0.000 | 0.245      |
| E36 | 0.111 | 0.125 | 0.100 | 0.000 | 0.778 | 0.000 | 0.000 | 0.000 | 0.000 | 0.000 | 0.111 | 0.000 | 0.000 | 0.000 | 0.000 | 0.000 | 0.000 | 0.156      |
| E37 | 0.778 | 0.000 | 0.100 | 0.778 | 0.000 | 0.778 | 0.731 | 0.000 | 0.778 | 0.778 | 0.778 | 0.875 | 0.000 | 0.000 | 0.000 | 0.000 | 0.000 | 0.054      |



Table S76. Case 20. Weighted Supermatrix and Priorities, according to procedure 2.

[illegible]

Table S76. Case 20. Weighted Supermatrix and Priorities, according to procedure 2 (continue).

|     | E21   | E22   | E23   | E24   | E25   | E26   | E27   | E28   | E29   | E30   | E31   | E32   | E33   | E34   | E35   | E36   | E37   | Priorities |
|-----|-------|-------|-------|-------|-------|-------|-------|-------|-------|-------|-------|-------|-------|-------|-------|-------|-------|------------|
| E1  | 0.020 | 0.021 | 0.019 | 0.020 | 0.020 | 0.020 | 0.019 | 0.021 | 0.020 | 0.020 | 0.020 | 0.021 | 0.022 | 0.022 | 0.014 | 0.039 | 0.021 | 0.021      |
| E2  | 0.020 | 0.021 | 0.019 | 0.020 | 0.020 | 0.020 | 0.019 | 0.021 | 0.020 | 0.020 | 0.020 | 0.021 | 0.022 | 0.022 | 0.014 | 0.114 | 0.021 | 0.026      |
| E3  | 0.020 | 0.021 | 0.019 | 0.020 | 0.020 | 0.020 | 0.019 | 0.021 | 0.020 | 0.020 | 0.020 | 0.021 | 0.022 | 0.022 | 0.014 | 0.039 | 0.021 | 0.021      |
| E4  | 0.020 | 0.021 | 0.019 | 0.020 | 0.020 | 0.020 | 0.019 | 0.021 | 0.020 | 0.020 | 0.020 | 0.021 | 0.022 | 0.022 | 0.014 | 0.014 | 0.021 | 0.019      |
| E5  | 0.020 | 0.021 | 0.019 | 0.020 | 0.020 | 0.020 | 0.019 | 0.021 | 0.020 | 0.020 | 0.020 | 0.021 | 0.022 | 0.022 | 0.014 | 0.014 | 0.021 | 0.019      |
| E6  | 0.020 | 0.021 | 0.019 | 0.020 | 0.020 | 0.020 | 0.019 | 0.021 | 0.020 | 0.020 | 0.020 | 0.021 | 0.022 | 0.022 | 0.014 | 0.039 | 0.021 | 0.021      |
| E7  | 0.020 | 0.021 | 0.019 | 0.020 | 0.020 | 0.020 | 0.019 | 0.021 | 0.020 | 0.020 | 0.020 | 0.021 | 0.022 | 0.022 | 0.014 | 0.014 | 0.021 | 0.019      |
| E8  | 0.020 | 0.021 | 0.019 | 0.020 | 0.020 | 0.020 | 0.019 | 0.021 | 0.020 | 0.020 | 0.020 | 0.021 | 0.022 | 0.022 | 0.014 | 0.162 | 0.021 | 0.030      |
| E9  | 0.020 | 0.021 | 0.019 | 0.020 | 0.020 | 0.020 | 0.019 | 0.021 | 0.020 | 0.020 | 0.020 | 0.021 | 0.022 | 0.022 | 0.040 | 0.073 | 0.021 | 0.025      |
| E10 | 0.020 | 0.021 | 0.019 | 0.020 | 0.020 | 0.020 | 0.019 | 0.021 | 0.020 | 0.020 | 0.020 | 0.021 | 0.022 | 0.022 | 0.040 | 0.039 | 0.021 | 0.023      |
| E11 | 0.020 | 0.021 | 0.019 | 0.020 | 0.020 | 0.020 | 0.019 | 0.021 | 0.020 | 0.020 | 0.020 | 0.021 | 0.022 | 0.022 | 0.014 | 0.014 | 0.021 | 0.020      |
| E12 | 0.020 | 0.021 | 0.019 | 0.020 | 0.020 | 0.020 | 0.019 | 0.021 | 0.020 | 0.020 | 0.020 | 0.021 | 0.022 | 0.022 | 0.163 | 0.014 | 0.021 | 0.031      |
| E13 | 0.020 | 0.021 | 0.019 | 0.020 | 0.020 | 0.020 | 0.019 | 0.021 | 0.020 | 0.020 | 0.020 | 0.021 | 0.022 | 0.022 | 0.040 | 0.073 | 0.021 | 0.027      |
| E14 | 0.020 | 0.021 | 0.019 | 0.020 | 0.020 | 0.020 | 0.019 | 0.021 | 0.020 | 0.020 | 0.020 | 0.021 | 0.022 | 0.022 | 0.115 | 0.014 | 0.021 | 0.032      |
| E15 | 0.020 | 0.021 | 0.019 | 0.020 | 0.020 | 0.020 | 0.019 | 0.021 | 0.020 | 0.020 | 0.020 | 0.021 | 0.022 | 0.022 | 0.074 | 0.039 | 0.021 | 0.033      |
| E16 | 0.020 | 0.021 | 0.019 | 0.020 | 0.020 | 0.020 | 0.019 | 0.021 | 0.020 | 0.020 | 0.020 | 0.021 | 0.022 | 0.022 | 0.014 | 0.014 | 0.021 | 0.023      |
| E17 | 0.020 | 0.021 | 0.019 | 0.020 | 0.020 | 0.020 | 0.019 | 0.021 | 0.020 | 0.020 | 0.020 | 0.021 | 0.022 | 0.022 | 0.014 | 0.014 | 0.021 | 0.020      |
| E18 | 0.020 | 0.021 | 0.019 | 0.020 | 0.020 | 0.020 | 0.019 | 0.021 | 0.020 | 0.020 | 0.020 | 0.021 | 0.022 | 0.022 | 0.074 | 0.014 | 0.021 | 0.024      |
| E19 | 0.020 | 0.021 | 0.019 | 0.020 | 0.020 | 0.020 | 0.019 | 0.021 | 0.020 | 0.020 | 0.020 | 0.021 | 0.022 | 0.022 | 0.040 | 0.014 | 0.021 | 0.022      |
| E20 | 0.020 | 0.021 | 0.019 | 0.020 | 0.020 | 0.020 | 0.019 | 0.021 | 0.020 | 0.020 | 0.020 | 0.021 | 0.022 | 0.022 | 0.014 | 0.014 | 0.021 | 0.019      |
| E21 | 0.020 | 0.021 | 0.019 | 0.020 | 0.020 | 0.020 | 0.019 | 0.021 | 0.020 | 0.020 | 0.020 | 0.021 | 0.022 | 0.022 | 0.014 | 0.014 | 0.021 | 0.022      |
| E22 | 0.020 | 0.021 | 0.057 | 0.060 | 0.060 | 0.060 | 0.056 | 0.062 | 0.060 | 0.060 | 0.060 | 0.062 | 0.200 | 0.200 | 0.014 | 0.014 | 0.062 | 0.037      |
| E23 | 0.020 | 0.021 | 0.019 | 0.020 | 0.020 | 0.020 | 0.019 | 0.021 | 0.020 | 0.020 | 0.020 | 0.021 | 0.022 | 0.022 | 0.014 | 0.014 | 0.021 | 0.019      |
| E24 | 0.020 | 0.021 | 0.019 | 0.020 | 0.020 | 0.020 | 0.019 | 0.021 | 0.020 | 0.020 | 0.020 | 0.021 | 0.022 | 0.022 | 0.014 | 0.014 | 0.021 | 0.019      |
| E25 | 0.020 | 0.021 | 0.019 | 0.020 | 0.020 | 0.020 | 0.019 | 0.021 | 0.020 | 0.020 | 0.020 | 0.021 | 0.022 | 0.022 | 0.014 | 0.014 | 0.021 | 0.019      |
| E26 | 0.020 | 0.021 | 0.019 | 0.020 | 0.020 | 0.020 | 0.019 | 0.021 | 0.020 | 0.020 | 0.020 | 0.021 | 0.022 | 0.022 | 0.014 | 0.014 | 0.021 | 0.019      |
| E27 | 0.020 | 0.021 | 0.019 | 0.020 | 0.020 | 0.020 | 0.019 | 0.021 | 0.020 | 0.020 | 0.020 | 0.021 | 0.022 | 0.022 | 0.014 | 0.014 | 0.021 | 0.019      |
| E28 | 0.020 | 0.021 | 0.019 | 0.020 | 0.020 | 0.020 | 0.019 | 0.021 | 0.020 | 0.020 | 0.020 | 0.021 | 0.022 | 0.022 | 0.014 | 0.014 | 0.197 | 0.032      |
| E29 | 0.020 | 0.021 | 0.019 | 0.020 | 0.020 | 0.020 | 0.019 | 0.021 | 0.020 | 0.020 | 0.020 | 0.021 | 0.022 | 0.022 | 0.014 | 0.014 | 0.021 | 0.019      |
| E30 | 0.020 | 0.021 | 0.019 | 0.020 | 0.020 | 0.020 | 0.019 | 0.021 | 0.020 | 0.020 | 0.020 | 0.021 | 0.022 | 0.022 | 0.014 | 0.014 | 0.021 | 0.019      |
| E31 | 0.020 | 0.021 | 0.019 | 0.020 | 0.020 | 0.020 | 0.019 | 0.021 | 0.020 | 0.020 | 0.020 | 0.021 | 0.022 | 0.022 | 0.014 | 0.014 | 0.021 | 0.019      |
| E32 | 0.020 | 0.021 | 0.019 | 0.020 | 0.020 | 0.020 | 0.019 | 0.021 | 0.020 | 0.020 | 0.020 | 0.021 | 0.022 | 0.022 | 0.014 | 0.014 | 0.021 | 0.019      |
| E33 | 0.020 | 0.021 | 0.019 | 0.020 | 0.020 | 0.020 | 0.019 | 0.021 | 0.020 | 0.020 | 0.020 | 0.021 | 0.022 | 0.022 | 0.014 | 0.014 | 0.021 | 0.019      |
| E34 | 0.020 | 0.021 | 0.019 | 0.020 | 0.020 | 0.020 | 0.019 | 0.021 | 0.020 | 0.020 | 0.020 | 0.021 | 0.022 | 0.022 | 0.014 | 0.014 | 0.021 | 0.019      |
| E35 | 0.060 | 0.197 | 0.192 | 0.060 | 0.060 | 0.060 | 0.097 | 0.197 | 0.060 | 0.060 | 0.020 | 0.021 | 0.022 | 0.022 | 0.014 | 0.014 | 0.021 | 0.081      |
| E36 | 0.060 | 0.062 | 0.057 | 0.020 | 0.195 | 0.020 | 0.019 | 0.021 | 0.020 | 0.020 | 0.060 | 0.021 | 0.022 | 0.022 | 0.014 | 0.014 | 0.021 | 0.064      |
| E37 | 0.195 | 0.021 | 0.057 | 0.195 | 0.020 | 0.195 | 0.189 | 0.021 | 0.195 | 0.195 | 0.195 | 0.197 | 0.022 | 0.022 | 0.014 | 0.014 | 0.021 | 0.075      |

Table S77. Case 21. Original Weighted Supermatrix and Priorities.

|     | E1    | E2    | E3    | E4    | E5    | E6    | E7    | E8    | E9    | E10   | E11   | E12   | E13   | Priorities |
|-----|-------|-------|-------|-------|-------|-------|-------|-------|-------|-------|-------|-------|-------|------------|
| E1  | 0.000 | 0.000 | 0.000 | 0.025 | 0.039 | 0.249 | 0.147 | 0.096 | 0.013 | 0.028 | 0.187 | 0.077 | 0.194 | 0.082      |
| E2  | 0.000 | 0.000 | 0.000 | 0.080 | 0.103 | 0.654 | 0.040 | 0.003 | 0.061 | 0.011 | 0.007 | 0.229 | 0.114 | 0.100      |
| E3  | 0.000 | 0.000 | 0.000 | 0.127 | 0.090 | 0.095 | 0.045 | 0.228 | 0.035 | 0.069 | 0.082 | 0.034 | 0.033 | 0.054      |
| E4  | 0.047 | 0.082 | 0.050 | 0.000 | 0.000 | 0.000 | 0.000 | 0.000 | 0.000 | 0.000 | 0.000 | 0.000 | 0.081 | 0.025      |
| E5  | 0.089 | 0.035 | 0.063 | 0.000 | 0.000 | 0.000 | 0.000 | 0.000 | 0.211 | 0.211 | 0.658 | 0.658 | 0.122 | 0.191      |
| E6  | 0.027 | 0.037 | 0.035 | 0.000 | 0.000 | 0.000 | 0.000 | 0.645 | 0.000 | 0.000 | 0.000 | 0.000 | 0.111 | 0.040      |
| E7  | 0.042 | 0.047 | 0.051 | 0.000 | 0.000 | 0.000 | 0.000 | 0.000 | 0.000 | 0.000 | 0.000 | 0.000 | 0.214 | 0.038      |
| E8  | 0.045 | 0.049 | 0.051 | 0.000 | 0.000 | 0.000 | 0.000 | 0.000 | 0.000 | 0.000 | 0.000 | 0.000 | 0.129 | 0.028      |
| E9  | 0.000 | 0.144 | 0.136 | 0.000 | 0.061 | 0.000 | 0.000 | 0.000 | 0.000 | 0.000 | 0.000 | 0.000 | 0.000 | 0.033      |
| E10 | 0.185 | 0.105 | 0.189 | 0.000 | 0.159 | 0.000 | 0.000 | 0.000 | 0.000 | 0.000 | 0.000 | 0.000 | 0.000 | 0.067      |
| E11 | 0.165 | 0.150 | 0.185 | 0.000 | 0.086 | 0.000 | 0.000 | 0.000 | 0.679 | 0.374 | 0.000 | 0.000 | 0.000 | 0.103      |
| E12 | 0.157 | 0.229 | 0.178 | 0.767 | 0.179 | 0.000 | 0.000 | 0.000 | 0.000 | 0.142 | 0.000 | 0.000 | 0.000 | 0.109      |
| E13 | 0.242 | 0.121 | 0.060 | 0.000 | 0.281 | 0.000 | 0.767 | 0.000 | 0.000 | 0.163 | 0.000 | 0.000 | 0.000 | 0.129      |

Table S78. Case 21's X Influence Matrix.

|     | E1 | E2 | E3 | E4 | E5 | E6 | E7 | E8 | E9 | E10 | E11 | E12 | E13 |
|-----|----|----|----|----|----|----|----|----|----|-----|-----|-----|-----|
| E1  | 0  | 0  | 0  | 0  | 0  | 1  | 0  | 0  | 0  | 0   | 1   | 0   | 4   |
| E2  | 0  | 0  | 0  | 0  | 1  | 4  | 0  | 0  | 0  | 0   | 0   | 1   | 2   |
| E3  | 0  | 0  | 0  | 0  | 1  | 0  | 0  | 1  | 0  | 0   | 0   | 0   | 0   |
| E4  | 0  | 1  | 1  | 0  | 0  | 0  | 0  | 0  | 0  | 0   | 0   | 0   | 1   |
| E5  | 1  | 0  | 1  | 0  | 0  | 0  | 0  | 0  | 1  | 2   | 4   | 4   | 2   |
| E6  | 0  | 0  | 0  | 0  | 0  | 0  | 0  | 4  | 0  | 0   | 0   | 0   | 2   |
| E7  | 0  | 1  | 1  | 0  | 0  | 0  | 0  | 0  | 0  | 0   | 0   | 0   | 4   |
| E8  | 0  | 1  | 1  | 0  | 0  | 0  | 0  | 0  | 0  | 0   | 0   | 0   | 3   |
| E9  | 0  | 3  | 3  | 0  | 1  | 0  | 0  | 0  | 0  | 0   | 0   | 0   | 0   |
| E10 | 3  | 2  | 4  | 0  | 2  | 0  | 0  | 0  | 0  | 0   | 0   | 0   | 0   |
| E11 | 3  | 3  | 4  | 0  | 1  | 0  | 0  | 0  | 4  | 4   | 0   | 0   | 0   |
| E12 | 3  | 4  | 4  | 4  | 3  | 0  | 0  | 0  | 0  | 1   | 0   | 0   | 0   |
| E13 | 4  | 2  | 1  | 0  | 4  | 0  | 4  | 0  | 0  | 2   | 0   | 0   | 0   |

Table S79. Case 21. Weighted Supermatrix and Priorities, according to procedure 1.

|     | E1    | E2    | E3    | E4    | E5    | E6    | E7    | E8    | E9    | E10   | E11   | E12   | E13   | Priorities |
|-----|-------|-------|-------|-------|-------|-------|-------|-------|-------|-------|-------|-------|-------|------------|
| E1  | 0.000 | 0.000 | 0.000 | 0.000 | 0.000 | 0.125 | 0.000 | 0.000 | 0.000 | 0.000 | 0.125 | 0.000 | 0.314 | 0.082      |
| E2  | 0.000 | 0.000 | 0.000 | 0.000 | 0.049 | 0.875 | 0.000 | 0.000 | 0.000 | 0.000 | 0.000 | 0.125 | 0.064 | 0.074      |
| E3  | 0.000 | 0.000 | 0.000 | 0.000 | 0.049 | 0.000 | 0.000 | 0.125 | 0.000 | 0.000 | 0.000 | 0.000 | 0.000 | 0.014      |
| E4  | 0.000 | 0.035 | 0.031 | 0.000 | 0.000 | 0.000 | 0.000 | 0.000 | 0.000 | 0.000 | 0.000 | 0.000 | 0.030 | 0.009      |
| E5  | 0.041 | 0.000 | 0.031 | 0.000 | 0.000 | 0.000 | 0.000 | 0.000 | 0.125 | 0.151 | 0.875 | 0.875 | 0.064 | 0.200      |
| E6  | 0.000 | 0.000 | 0.000 | 0.000 | 0.000 | 0.000 | 0.000 | 0.875 | 0.000 | 0.000 | 0.000 | 0.000 | 0.064 | 0.043      |
| E7  | 0.000 | 0.035 | 0.031 | 0.000 | 0.000 | 0.000 | 0.000 | 0.000 | 0.000 | 0.000 | 0.000 | 0.000 | 0.314 | 0.068      |
| E8  | 0.000 | 0.035 | 0.031 | 0.000 | 0.000 | 0.000 | 0.000 | 0.000 | 0.000 | 0.000 | 0.000 | 0.000 | 0.151 | 0.034      |
| E9  | 0.000 | 0.183 | 0.125 | 0.000 | 0.049 | 0.000 | 0.000 | 0.000 | 0.000 | 0.000 | 0.000 | 0.000 | 0.000 | 0.025      |
| E10 | 0.171 | 0.082 | 0.240 | 0.000 | 0.123 | 0.000 | 0.000 | 0.000 | 0.000 | 0.000 | 0.000 | 0.000 | 0.000 | 0.048      |
| E11 | 0.171 | 0.183 | 0.240 | 0.000 | 0.049 | 0.000 | 0.000 | 0.000 | 0.875 | 0.635 | 0.000 | 0.000 | 0.000 | 0.093      |
| E12 | 0.171 | 0.367 | 0.240 | 1.000 | 0.242 | 0.000 | 0.000 | 0.000 | 0.000 | 0.062 | 0.000 | 0.000 | 0.000 | 0.105      |
| E13 | 0.447 | 0.082 | 0.031 | 0.000 | 0.440 | 0.000 | 1.000 | 0.000 | 0.000 | 0.151 | 0.000 | 0.000 | 0.000 | 0.206      |

Table S80. Case 21. Weighted Supermatrix and Priorities, according to procedure 2.

|     | E1    | E2    | E3    | E4    | E5    | E6    | E7    | E8    | E9    | E10   | E11   | E12   | E13   | Priorities |
|-----|-------|-------|-------|-------|-------|-------|-------|-------|-------|-------|-------|-------|-------|------------|
| E1  | 0.023 | 0.018 | 0.016 | 0.048 | 0.022 | 0.120 | 0.048 | 0.042 | 0.042 | 0.030 | 0.120 | 0.042 | 0.243 | 0.074      |
| E2  | 0.023 | 0.018 | 0.016 | 0.048 | 0.056 | 0.416 | 0.048 | 0.042 | 0.042 | 0.030 | 0.042 | 0.120 | 0.076 | 0.074      |
| E3  | 0.023 | 0.018 | 0.016 | 0.048 | 0.056 | 0.042 | 0.048 | 0.120 | 0.042 | 0.030 | 0.042 | 0.042 | 0.018 | 0.040      |
| E4  | 0.023 | 0.042 | 0.036 | 0.048 | 0.022 | 0.042 | 0.048 | 0.042 | 0.042 | 0.030 | 0.042 | 0.042 | 0.039 | 0.037      |
| E5  | 0.056 | 0.018 | 0.036 | 0.048 | 0.022 | 0.042 | 0.048 | 0.042 | 0.120 | 0.147 | 0.416 | 0.416 | 0.076 | 0.136      |
| E6  | 0.023 | 0.018 | 0.016 | 0.048 | 0.022 | 0.042 | 0.048 | 0.416 | 0.042 | 0.030 | 0.042 | 0.042 | 0.076 | 0.058      |
| E7  | 0.023 | 0.042 | 0.036 | 0.048 | 0.022 | 0.042 | 0.048 | 0.042 | 0.042 | 0.030 | 0.042 | 0.042 | 0.243 | 0.063      |
| E8  | 0.023 | 0.042 | 0.036 | 0.048 | 0.022 | 0.042 | 0.048 | 0.042 | 0.042 | 0.030 | 0.042 | 0.042 | 0.142 | 0.050      |
| E9  | 0.023 | 0.163 | 0.125 | 0.048 | 0.056 | 0.042 | 0.048 | 0.042 | 0.042 | 0.030 | 0.042 | 0.042 | 0.018 | 0.051      |
| E10 | 0.160 | 0.087 | 0.211 | 0.048 | 0.119 | 0.042 | 0.048 | 0.042 | 0.042 | 0.030 | 0.042 | 0.042 | 0.018 | 0.068      |
| E11 | 0.160 | 0.163 | 0.211 | 0.048 | 0.056 | 0.042 | 0.048 | 0.042 | 0.416 | 0.362 | 0.042 | 0.042 | 0.018 | 0.107      |
| E12 | 0.160 | 0.284 | 0.211 | 0.429 | 0.203 | 0.042 | 0.048 | 0.042 | 0.042 | 0.078 | 0.042 | 0.042 | 0.018 | 0.111      |
| E13 | 0.283 | 0.087 | 0.036 | 0.048 | 0.321 | 0.042 | 0.429 | 0.042 | 0.042 | 0.147 | 0.042 | 0.042 | 0.018 | 0.129      |

Table S81. Case 22. Original Weighted Supermatrix and Priorities.

|     | E1    | E2    | E3    | E4    | E5    | E6    | E7    | E8    | E9    | E10   | E11   | E12   | E13   | E14   | E15   | Priorities |
|-----|-------|-------|-------|-------|-------|-------|-------|-------|-------|-------|-------|-------|-------|-------|-------|------------|
| E1  | 0.000 | 0.000 | 0.000 | 0.020 | 0.020 | 0.040 | 0.050 | 0.050 | 0.050 | 0.040 | 0.030 | 0.040 | 0.050 | 0.060 | 0.030 | 0.025      |
| E2  | 0.000 | 0.000 | 0.000 | 0.170 | 0.120 | 0.120 | 0.150 | 0.350 | 0.260 | 0.120 | 0.110 | 0.150 | 0.180 | 0.120 | 0.190 | 0.111      |
| E3  | 0.000 | 0.000 | 0.000 | 0.100 | 0.250 | 0.240 | 0.310 | 0.160 | 0.270 | 0.250 | 0.270 | 0.340 | 0.420 | 0.250 | 0.390 | 0.194      |
| E4  | 0.290 | 0.130 | 0.130 | 0.000 | 0.000 | 0.180 | 0.240 | 0.120 | 0.070 | 0.140 | 0.160 | 0.070 | 0.100 | 0.090 | 0.110 | 0.116      |
| E5  | 0.100 | 0.040 | 0.030 | 0.000 | 0.000 | 0.040 | 0.050 | 0.040 | 0.070 | 0.050 | 0.020 | 0.010 | 0.020 | 0.030 | 0.020 | 0.028      |
| E6  | 0.060 | 0.030 | 0.030 | 0.020 | 0.010 | 0.000 | 0.000 | 0.000 | 0.040 | 0.040 | 0.040 | 0.040 | 0.020 | 0.030 | 0.030 | 0.025      |
| E7  | 0.130 | 0.120 | 0.110 | 0.070 | 0.050 | 0.000 | 0.000 | 0.000 | 0.100 | 0.130 | 0.130 | 0.140 | 0.080 | 0.110 | 0.080 | 0.085      |
| E8  | 0.030 | 0.020 | 0.020 | 0.010 | 0.010 | 0.000 | 0.000 | 0.000 | 0.020 | 0.020 | 0.020 | 0.020 | 0.010 | 0.020 | 0.010 | 0.014      |
| E9  | 0.010 | 0.020 | 0.070 | 0.010 | 0.010 | 0.010 | 0.010 | 0.010 | 0.000 | 0.000 | 0.000 | 0.000 | 0.010 | 0.080 | 0.040 | 0.027      |
| E10 | 0.010 | 0.040 | 0.020 | 0.050 | 0.030 | 0.020 | 0.010 | 0.020 | 0.000 | 0.000 | 0.000 | 0.000 | 0.030 | 0.080 | 0.040 | 0.027      |
| E11 | 0.040 | 0.080 | 0.040 | 0.110 | 0.080 | 0.050 | 0.030 | 0.030 | 0.000 | 0.000 | 0.000 | 0.000 | 0.060 | 0.080 | 0.040 | 0.051      |
| E12 | 0.010 | 0.030 | 0.020 | 0.050 | 0.030 | 0.020 | 0.010 | 0.020 | 0.000 | 0.000 | 0.000 | 0.000 | 0.020 | 0.080 | 0.040 | 0.025      |
| E13 | 0.140 | 0.220 | 0.240 | 0.180 | 0.240 | 0.140 | 0.070 | 0.060 | 0.060 | 0.100 | 0.110 | 0.090 | 0.000 | 0.000 | 0.000 | 0.124      |
| E14 | 0.040 | 0.040 | 0.050 | 0.040 | 0.040 | 0.030 | 0.010 | 0.020 | 0.020 | 0.020 | 0.020 | 0.020 | 0.000 | 0.000 | 0.000 | 0.025      |
| E15 | 0.140 | 0.230 | 0.250 | 0.180 | 0.110 | 0.120 | 0.070 | 0.130 | 0.060 | 0.100 | 0.100 | 0.000 | 0.000 | 0.000 | 0.000 | 0.123      |

Table S82. Case 22's X Influence Matrix.

|     | E1 | E2 | E3 | E4 | E5 | E6 | E7 | E8 | E9 | E10 | E11 | E12 | E13 | E14 | E15 |
|-----|----|----|----|----|----|----|----|----|----|-----|-----|-----|-----|-----|-----|
| E1  | 0  | 0  | 0  | 0  | 0  | 0  | 0  | 0  | 0  | 0   | 0   | 0   | 0   | 1   | 0   |
| E2  | 0  | 0  | 0  | 4  | 2  | 2  | 2  | 4  | 4  | 2   | 2   | 2   | 2   | 2   | 2   |
| E3  | 0  | 0  | 0  | 2  | 4  | 4  | 4  | 2  | 4  | 4   | 4   | 4   | 4   | 4   | 4   |
| E4  | 4  | 2  | 2  | 0  | 0  | 3  | 3  | 1  | 1  | 2   | 2   | 1   | 1   | 1   | 1   |
| E5  | 1  | 0  | 0  | 0  | 0  | 0  | 0  | 0  | 1  | 1   | 0   | 0   | 0   | 0   | 0   |
| E6  | 1  | 0  | 0  | 0  | 0  | 0  | 0  | 0  | 0  | 0   | 0   | 0   | 0   | 0   | 0   |
| E7  | 2  | 2  | 2  | 1  | 1  | 0  | 0  | 0  | 1  | 2   | 2   | 2   | 0   | 2   | 1   |
| E8  | 0  | 0  | 0  | 0  | 0  | 0  | 0  | 0  | 0  | 0   | 0   | 0   | 0   | 0   | 0   |
| E9  | 0  | 0  | 1  | 0  | 0  | 0  | 0  | 0  | 0  | 0   | 0   | 0   | 0   | 1   | 0   |
| E10 | 0  | 0  | 0  | 1  | 0  | 0  | 0  | 0  | 0  | 0   | 0   | 0   | 0   | 1   | 0   |
| E11 | 0  | 1  | 0  | 3  | 1  | 1  | 0  | 0  | 0  | 0   | 0   | 0   | 0   | 1   | 0   |
| E12 | 0  | 0  | 0  | 1  | 0  | 0  | 0  | 0  | 0  | 0   | 0   | 0   | 0   | 1   | 0   |
| E13 | 2  | 4  | 4  | 4  | 4  | 2  | 1  | 0  | 1  | 2   | 2   | 1   | 0   | 0   | 0   |
| E14 | 0  | 0  | 1  | 1  | 0  | 0  | 0  | 0  | 0  | 0   | 0   | 0   | 0   | 0   | 0   |
| E15 | 2  | 4  | 4  | 4  | 2  | 2  | 1  | 1  | 1  | 2   | 1   | 0   | 0   | 0   | 0   |

Table S83. Case 22. Weighted Supermatrix and Priorities, according to procedure 1.

|     | E1    | E2    | E3    | E4    | E5    | E6    | E7    | E8    | E9    | E10   | E11   | E12   | E13   | E14   | E15   | Priorities |
|-----|-------|-------|-------|-------|-------|-------|-------|-------|-------|-------|-------|-------|-------|-------|-------|------------|
| E1  | 0.000 | 0.000 | 0.000 | 0.000 | 0.000 | 0.000 | 0.000 | 0.000 | 0.000 | 0.000 | 0.000 | 0.000 | 0.000 | 0.050 | 0.000 | 0.001      |
| E2  | 0.000 | 0.000 | 0.000 | 0.235 | 0.094 | 0.092 | 0.122 | 0.657 | 0.368 | 0.101 | 0.113 | 0.153 | 0.188 | 0.138 | 0.191 | 0.109      |
| E3  | 0.000 | 0.000 | 0.000 | 0.063 | 0.365 | 0.456 | 0.514 | 0.191 | 0.368 | 0.459 | 0.505 | 0.576 | 0.731 | 0.427 | 0.657 | 0.318      |
| E4  | 0.515 | 0.091 | 0.094 | 0.000 | 0.000 | 0.229 | 0.258 | 0.076 | 0.053 | 0.101 | 0.113 | 0.059 | 0.081 | 0.050 | 0.076 | 0.089      |
| E5  | 0.049 | 0.000 | 0.000 | 0.000 | 0.000 | 0.000 | 0.000 | 0.000 | 0.053 | 0.038 | 0.000 | 0.000 | 0.000 | 0.000 | 0.000 | 0.001      |
| E6  | 0.049 | 0.000 | 0.000 | 0.000 | 0.000 | 0.000 | 0.000 | 0.000 | 0.000 | 0.000 | 0.000 | 0.000 | 0.000 | 0.000 | 0.000 | 0.000      |
| E7  | 0.129 | 0.091 | 0.094 | 0.028 | 0.040 | 0.000 | 0.000 | 0.000 | 0.053 | 0.101 | 0.113 | 0.153 | 0.000 | 0.138 | 0.076 | 0.062      |
| E8  | 0.000 | 0.000 | 0.000 | 0.000 | 0.000 | 0.000 | 0.000 | 0.000 | 0.000 | 0.000 | 0.000 | 0.000 | 0.000 | 0.000 | 0.000 | 0.000      |
| E9  | 0.000 | 0.000 | 0.040 | 0.000 | 0.000 | 0.000 | 0.000 | 0.000 | 0.000 | 0.000 | 0.000 | 0.000 | 0.000 | 0.050 | 0.000 | 0.014      |
| E10 | 0.000 | 0.000 | 0.000 | 0.028 | 0.000 | 0.000 | 0.000 | 0.000 | 0.000 | 0.000 | 0.000 | 0.000 | 0.000 | 0.050 | 0.000 | 0.003      |
| E11 | 0.000 | 0.042 | 0.000 | 0.120 | 0.040 | 0.040 | 0.000 | 0.000 | 0.000 | 0.000 | 0.000 | 0.000 | 0.000 | 0.050 | 0.000 | 0.016      |
| E12 | 0.000 | 0.000 | 0.000 | 0.028 | 0.000 | 0.000 | 0.000 | 0.000 | 0.000 | 0.000 | 0.000 | 0.000 | 0.000 | 0.050 | 0.000 | 0.003      |
| E13 | 0.129 | 0.388 | 0.365 | 0.235 | 0.365 | 0.092 | 0.053 | 0.000 | 0.053 | 0.101 | 0.113 | 0.059 | 0.000 | 0.000 | 0.000 | 0.186      |
| E14 | 0.000 | 0.000 | 0.040 | 0.028 | 0.000 | 0.000 | 0.000 | 0.000 | 0.000 | 0.000 | 0.000 | 0.000 | 0.000 | 0.000 | 0.000 | 0.015      |
| E15 | 0.129 | 0.388 | 0.365 | 0.235 | 0.094 | 0.092 | 0.053 | 0.076 | 0.053 | 0.101 | 0.044 | 0.000 | 0.000 | 0.000 | 0.000 | 0.184      |

Table S84. Case 22. Weighted Supermatrix and Priorities, according to procedure 2.

|     | E1    | E2    | E3    | E4    | E5    | E6    | E7    | E8    | E9    | E10   | E11   | E12   | E13   | E14   | E15   | Priorities |
|-----|-------|-------|-------|-------|-------|-------|-------|-------|-------|-------|-------|-------|-------|-------|-------|------------|
| E1  | 0.023 | 0.022 | 0.021 | 0.015 | 0.021 | 0.021 | 0.025 | 0.030 | 0.022 | 0.020 | 0.022 | 0.026 | 0.033 | 0.053 | 0.030 | 0.025      |
| E2  | 0.023 | 0.022 | 0.021 | 0.196 | 0.100 | 0.099 | 0.122 | 0.347 | 0.269 | 0.098 | 0.109 | 0.135 | 0.163 | 0.122 | 0.157 | 0.114      |
| E3  | 0.023 | 0.022 | 0.021 | 0.069 | 0.255 | 0.284 | 0.303 | 0.157 | 0.269 | 0.298 | 0.307 | 0.329 | 0.353 | 0.317 | 0.347 | 0.194      |
| E4  | 0.315 | 0.104 | 0.100 | 0.015 | 0.021 | 0.179 | 0.199 | 0.083 | 0.058 | 0.098 | 0.109 | 0.070 | 0.091 | 0.053 | 0.083 | 0.098      |
| E5  | 0.059 | 0.022 | 0.021 | 0.015 | 0.021 | 0.021 | 0.025 | 0.030 | 0.058 | 0.048 | 0.022 | 0.026 | 0.033 | 0.020 | 0.030 | 0.027      |
| E6  | 0.059 | 0.022 | 0.021 | 0.015 | 0.021 | 0.021 | 0.025 | 0.030 | 0.022 | 0.020 | 0.022 | 0.026 | 0.033 | 0.020 | 0.030 | 0.025      |
| E7  | 0.119 | 0.104 | 0.100 | 0.034 | 0.052 | 0.021 | 0.025 | 0.030 | 0.058 | 0.098 | 0.109 | 0.135 | 0.033 | 0.122 | 0.083 | 0.074      |
| E8  | 0.023 | 0.022 | 0.021 | 0.015 | 0.021 | 0.021 | 0.025 | 0.030 | 0.022 | 0.020 | 0.022 | 0.026 | 0.033 | 0.020 | 0.030 | 0.024      |
| E9  | 0.023 | 0.022 | 0.052 | 0.015 | 0.021 | 0.021 | 0.025 | 0.030 | 0.022 | 0.020 | 0.022 | 0.026 | 0.033 | 0.053 | 0.030 | 0.031      |
| E10 | 0.023 | 0.022 | 0.021 | 0.034 | 0.021 | 0.021 | 0.025 | 0.030 | 0.022 | 0.020 | 0.022 | 0.026 | 0.033 | 0.053 | 0.030 | 0.027      |
| E11 | 0.023 | 0.056 | 0.021 | 0.117 | 0.052 | 0.052 | 0.025 | 0.030 | 0.022 | 0.020 | 0.022 | 0.026 | 0.033 | 0.053 | 0.030 | 0.040      |
| E12 | 0.023 | 0.022 | 0.021 | 0.034 | 0.021 | 0.021 | 0.025 | 0.030 | 0.022 | 0.020 | 0.022 | 0.026 | 0.033 | 0.053 | 0.030 | 0.027      |
| E13 | 0.119 | 0.257 | 0.255 | 0.196 | 0.255 | 0.099 | 0.065 | 0.030 | 0.058 | 0.098 | 0.109 | 0.070 | 0.033 | 0.020 | 0.030 | 0.135      |
| E14 | 0.023 | 0.022 | 0.052 | 0.034 | 0.021 | 0.021 | 0.025 | 0.030 | 0.022 | 0.020 | 0.022 | 0.026 | 0.033 | 0.020 | 0.030 | 0.032      |
| E15 | 0.119 | 0.257 | 0.255 | 0.196 | 0.100 | 0.099 | 0.065 | 0.083 | 0.058 | 0.098 | 0.055 | 0.026 | 0.033 | 0.020 | 0.030 | 0.129      |

Table S85. Case 23. Original Weighted Supermatrix and Priorities.

|     | E1    | E2    | E3    | E4    | E5    | E6    | E7    | E8    | E9    | E10   | E11   | E12   | Priorities |
|-----|-------|-------|-------|-------|-------|-------|-------|-------|-------|-------|-------|-------|------------|
| E1  | 0.000 | 0.333 | 0.800 | 0.000 | 0.000 | 0.000 | 0.000 | 0.000 | 0.000 | 0.000 | 0.000 | 0.000 | 0.102      |
| E2  | 0.111 | 0.000 | 0.200 | 0.000 | 0.000 | 0.000 | 0.000 | 0.000 | 0.000 | 0.000 | 0.000 | 0.000 | 0.034      |
| E3  | 0.889 | 0.667 | 0.000 | 0.000 | 0.000 | 0.000 | 0.000 | 0.000 | 0.000 | 0.000 | 0.000 | 0.000 | 0.114      |
| E4  | 0.000 | 0.000 | 0.000 | 0.000 | 0.889 | 0.143 | 0.000 | 0.000 | 0.000 | 0.000 | 0.000 | 0.000 | 0.100      |
| E5  | 0.000 | 0.000 | 0.000 | 0.667 | 0.000 | 0.857 | 0.000 | 0.000 | 0.000 | 0.000 | 0.000 | 0.000 | 0.105      |
| E6  | 0.000 | 0.000 | 0.000 | 0.333 | 0.111 | 0.000 | 0.000 | 0.000 | 0.000 | 0.000 | 0.000 | 0.000 | 0.045      |
| E7  | 0.000 | 0.000 | 0.000 | 0.000 | 0.000 | 0.000 | 0.000 | 0.200 | 0.667 | 0.000 | 0.000 | 0.000 | 0.075      |
| E8  | 0.000 | 0.000 | 0.000 | 0.000 | 0.000 | 0.000 | 0.833 | 0.000 | 0.333 | 0.000 | 0.000 | 0.000 | 0.090      |
| E9  | 0.000 | 0.000 | 0.000 | 0.000 | 0.000 | 0.000 | 0.167 | 0.800 | 0.000 | 0.000 | 0.000 | 0.000 | 0.085      |
| E10 | 0.000 | 0.000 | 0.000 | 0.000 | 0.000 | 0.000 | 0.000 | 0.000 | 0.000 | 0.000 | 0.333 | 0.800 | 0.102      |
| E11 | 0.000 | 0.000 | 0.000 | 0.000 | 0.000 | 0.000 | 0.000 | 0.000 | 0.000 | 0.111 | 0.000 | 0.200 | 0.034      |
| E12 | 0.000 | 0.000 | 0.000 | 0.000 | 0.000 | 0.000 | 0.000 | 0.000 | 0.000 | 0.889 | 0.667 | 0.000 | 0.114      |

Table S86. Case 23's X Influence Matrix.

|     | E1 | E2 | E3 | E4 | E5 | E6 | E7 | E8 | E9 | E10 | E11 | E12 |
|-----|----|----|----|----|----|----|----|----|----|-----|-----|-----|
| E1  | 0  | 2  | 4  | 0  | 0  | 0  | 0  | 0  | 0  | 0   | 0   | 0   |
| E2  | 0  | 0  | 1  | 0  | 0  | 0  | 0  | 0  | 0  | 0   | 0   | 0   |
| E3  | 4  | 4  | 0  | 0  | 0  | 0  | 0  | 0  | 0  | 0   | 0   | 0   |
| E4  | 0  | 0  | 0  | 0  | 4  | 0  | 0  | 0  | 0  | 0   | 0   | 0   |
| E5  | 0  | 0  | 0  | 4  | 0  | 4  | 0  | 0  | 0  | 0   | 0   | 0   |
| E6  | 0  | 0  | 0  | 2  | 0  | 0  | 0  | 0  | 0  | 0   | 0   | 0   |
| E7  | 0  | 0  | 0  | 0  | 0  | 0  | 0  | 1  | 4  | 0   | 0   | 0   |
| E8  | 0  | 0  | 0  | 0  | 0  | 0  | 4  | 0  | 2  | 0   | 0   | 0   |
| E9  | 0  | 0  | 0  | 0  | 0  | 0  | 1  | 4  | 0  | 0   | 0   | 0   |
| E10 | 0  | 0  | 0  | 0  | 0  | 0  | 0  | 0  | 0  | 0   | 2   | 4   |
| E11 | 0  | 0  | 0  | 0  | 0  | 0  | 0  | 0  | 0  | 0   | 0   | 1   |
| E12 | 0  | 0  | 0  | 0  | 0  | 0  | 0  | 0  | 0  | 4   | 4   | 0   |

Table S87. Case 23. Weighted Supermatrix and Priorities, according to procedure 1.

|     | E1    | E2    | E3    | E4    | E5    | E6    | E7    | E8    | E9    | E10   | E11   | E12   | Priorities |
|-----|-------|-------|-------|-------|-------|-------|-------|-------|-------|-------|-------|-------|------------|
| E1  | 0.000 | 0.167 | 0.875 | 0.000 | 0.000 | 0.000 | 0.000 | 0.000 | 0.000 | 0.000 | 0.000 | 0.000 | 0.111      |
| E2  | 0.000 | 0.000 | 0.125 | 0.000 | 0.000 | 0.000 | 0.000 | 0.000 | 0.000 | 0.000 | 0.000 | 0.000 | 0.015      |
| E3  | 1.000 | 0.833 | 0.000 | 0.000 | 0.000 | 0.000 | 0.000 | 0.000 | 0.000 | 0.000 | 0.000 | 0.000 | 0.124      |
| E4  | 0.000 | 0.000 | 0.000 | 0.000 | 1.000 | 0.000 | 0.000 | 0.000 | 0.000 | 0.000 | 0.000 | 0.000 | 0.115      |
| E5  | 0.000 | 0.000 | 0.000 | 0.833 | 0.000 | 1.000 | 0.000 | 0.000 | 0.000 | 0.000 | 0.000 | 0.000 | 0.115      |
| E6  | 0.000 | 0.000 | 0.000 | 0.167 | 0.000 | 0.000 | 0.000 | 0.000 | 0.000 | 0.000 | 0.000 | 0.000 | 0.019      |
| E7  | 0.000 | 0.000 | 0.000 | 0.000 | 0.000 | 0.000 | 0.000 | 0.125 | 0.833 | 0.000 | 0.000 | 0.000 | 0.081      |
| E8  | 0.000 | 0.000 | 0.000 | 0.000 | 0.000 | 0.000 | 0.875 | 0.000 | 0.167 | 0.000 | 0.000 | 0.000 | 0.085      |
| E9  | 0.000 | 0.000 | 0.000 | 0.000 | 0.000 | 0.000 | 0.125 | 0.875 | 0.000 | 0.000 | 0.000 | 0.000 | 0.084      |
| E10 | 0.000 | 0.000 | 0.000 | 0.000 | 0.000 | 0.000 | 0.000 | 0.000 | 0.000 | 0.000 | 0.167 | 0.875 | 0.111      |
| E11 | 0.000 | 0.000 | 0.000 | 0.000 | 0.000 | 0.000 | 0.000 | 0.000 | 0.000 | 0.000 | 0.000 | 0.125 | 0.015      |
| E12 | 0.000 | 0.000 | 0.000 | 0.000 | 0.000 | 0.000 | 0.000 | 0.000 | 0.000 | 1.000 | 0.833 | 0.000 | 0.124      |

Table S88. Case 23. Weighted Supermatrix and Priorities, according to procedure 2.

|     | E1    | E2    | E3    | E4    | E5    | E6    | E7    | E8    | E9    | E10   | E11   | E12   | Priorities |
|-----|-------|-------|-------|-------|-------|-------|-------|-------|-------|-------|-------|-------|------------|
| E1  | 0.050 | 0.188 | 0.436 | 0.040 | 0.050 | 0.050 | 0.044 | 0.044 | 0.040 | 0.050 | 0.040 | 0.044 | 0.093      |
| E2  | 0.050 | 0.040 | 0.125 | 0.040 | 0.050 | 0.050 | 0.044 | 0.044 | 0.040 | 0.050 | 0.040 | 0.044 | 0.053      |
| E3  | 0.450 | 0.411 | 0.044 | 0.040 | 0.050 | 0.050 | 0.044 | 0.044 | 0.040 | 0.050 | 0.040 | 0.044 | 0.102      |
| E4  | 0.050 | 0.040 | 0.044 | 0.040 | 0.450 | 0.050 | 0.044 | 0.044 | 0.040 | 0.050 | 0.040 | 0.044 | 0.085      |
| E5  | 0.050 | 0.040 | 0.044 | 0.411 | 0.050 | 0.450 | 0.044 | 0.044 | 0.040 | 0.050 | 0.040 | 0.044 | 0.099      |
| E6  | 0.050 | 0.040 | 0.044 | 0.188 | 0.050 | 0.050 | 0.044 | 0.044 | 0.040 | 0.050 | 0.040 | 0.044 | 0.057      |
| E7  | 0.050 | 0.040 | 0.044 | 0.040 | 0.050 | 0.050 | 0.044 | 0.125 | 0.411 | 0.050 | 0.040 | 0.044 | 0.085      |
| E8  | 0.050 | 0.040 | 0.044 | 0.040 | 0.050 | 0.050 | 0.436 | 0.044 | 0.188 | 0.050 | 0.040 | 0.044 | 0.091      |
| E9  | 0.050 | 0.040 | 0.044 | 0.040 | 0.050 | 0.050 | 0.125 | 0.436 | 0.040 | 0.050 | 0.040 | 0.044 | 0.088      |
| E10 | 0.050 | 0.040 | 0.044 | 0.040 | 0.050 | 0.050 | 0.044 | 0.044 | 0.040 | 0.050 | 0.188 | 0.436 | 0.093      |
| E11 | 0.050 | 0.040 | 0.044 | 0.040 | 0.050 | 0.050 | 0.044 | 0.044 | 0.040 | 0.050 | 0.040 | 0.125 | 0.053      |
| E12 | 0.050 | 0.040 | 0.044 | 0.040 | 0.050 | 0.050 | 0.044 | 0.044 | 0.040 | 0.450 | 0.411 | 0.044 | 0.102      |

Table S89. Case 24. Original Weighted Supermatrix and Priorities.

|     | E1    | E2    | E3    | E4    | E5    | E6    | E7    | E8    | E9    | E10   | E11   | E12   | E13   | E14   | E15   | Priorities |
|-----|-------|-------|-------|-------|-------|-------|-------|-------|-------|-------|-------|-------|-------|-------|-------|------------|
| E1  | 0.000 | 0.075 | 0.195 | 0.220 | 0.000 | 0.000 | 0.000 | 0.000 | 0.000 | 0.000 | 0.000 | 0.000 | 0.000 | 0.000 | 0.000 | 0.043      |
| E2  | 0.088 | 0.000 | 0.088 | 0.087 | 0.000 | 0.000 | 0.000 | 0.000 | 0.000 | 0.000 | 0.000 | 0.000 | 0.000 | 0.000 | 0.000 | 0.022      |
| E3  | 0.717 | 0.747 | 0.000 | 0.693 | 0.000 | 0.000 | 0.000 | 0.000 | 0.000 | 0.000 | 0.000 | 0.000 | 0.000 | 0.000 | 0.000 | 0.110      |
| E4  | 0.195 | 0.178 | 0.717 | 0.000 | 0.000 | 0.000 | 0.000 | 0.000 | 0.000 | 0.000 | 0.000 | 0.000 | 0.000 | 0.000 | 0.000 | 0.091      |
| E5  | 0.000 | 0.000 | 0.000 | 0.000 | 0.000 | 0.484 | 0.511 | 0.085 | 0.000 | 0.000 | 0.000 | 0.000 | 0.000 | 0.000 | 0.000 | 0.080      |
| E6  | 0.000 | 0.000 | 0.000 | 0.000 | 0.625 | 0.000 | 0.373 | 0.714 | 0.000 | 0.000 | 0.000 | 0.000 | 0.000 | 0.000 | 0.000 | 0.095      |
| E7  | 0.000 | 0.000 | 0.000 | 0.000 | 0.284 | 0.349 | 0.000 | 0.201 | 0.000 | 0.000 | 0.000 | 0.000 | 0.000 | 0.000 | 0.000 | 0.062      |
| E8  | 0.000 | 0.000 | 0.000 | 0.000 | 0.092 | 0.168 | 0.117 | 0.000 | 0.000 | 0.000 | 0.000 | 0.000 | 0.000 | 0.000 | 0.000 | 0.030      |
| E9  | 0.000 | 0.000 | 0.000 | 0.000 | 0.000 | 0.000 | 0.000 | 0.000 | 0.000 | 0.138 | 0.609 | 0.594 | 0.000 | 0.000 | 0.000 | 0.084      |
| E10 | 0.000 | 0.000 | 0.000 | 0.000 | 0.000 | 0.000 | 0.000 | 0.000 | 0.218 | 0.000 | 0.311 | 0.312 | 0.000 | 0.000 | 0.000 | 0.057      |
| E11 | 0.000 | 0.000 | 0.000 | 0.000 | 0.000 | 0.000 | 0.000 | 0.000 | 0.725 | 0.696 | 0.000 | 0.094 | 0.000 | 0.000 | 0.000 | 0.103      |
| E12 | 0.000 | 0.000 | 0.000 | 0.000 | 0.000 | 0.000 | 0.000 | 0.000 | 0.057 | 0.166 | 0.080 | 0.000 | 0.000 | 0.000 | 0.000 | 0.023      |
| E13 | 0.000 | 0.000 | 0.000 | 0.000 | 0.000 | 0.000 | 0.000 | 0.000 | 0.000 | 0.000 | 0.000 | 0.000 | 0.000 | 0.875 | 0.833 | 0.092      |
| E14 | 0.000 | 0.000 | 0.000 | 0.000 | 0.000 | 0.000 | 0.000 | 0.000 | 0.000 | 0.000 | 0.000 | 0.000 | 0.143 | 0.000 | 0.167 | 0.027      |
| E15 | 0.000 | 0.000 | 0.000 | 0.000 | 0.000 | 0.000 | 0.000 | 0.000 | 0.000 | 0.000 | 0.000 | 0.000 | 0.857 | 0.125 | 0.000 | 0.082      |



Table S90. Case 24's X Influence Matrix.

|     | E1 | E2 | E3 | E4 | E5 | E6 | E7 | E8 | E9 | E10 | E11 | E12 | E13 | E14 | E15 |
|-----|----|----|----|----|----|----|----|----|----|-----|-----|-----|-----|-----|-----|
| E1  | 0  | 0  | 1  | 1  | 0  | 0  | 0  | 0  | 0  | 0   | 0   | 0   | 0   | 0   | 0   |
| E2  | 0  | 0  | 0  | 0  | 0  | 0  | 0  | 0  | 0  | 0   | 0   | 0   | 0   | 0   | 0   |
| E3  | 4  | 4  | 0  | 4  | 0  | 0  | 0  | 0  | 0  | 0   | 0   | 0   | 0   | 0   | 0   |
| E4  | 1  | 1  | 4  | 0  | 0  | 0  | 0  | 0  | 0  | 0   | 0   | 0   | 0   | 0   | 0   |
| E5  | 0  | 0  | 0  | 0  | 0  | 4  | 4  | 0  | 0  | 0   | 0   | 0   | 0   | 0   | 0   |
| E6  | 0  | 0  | 0  | 0  | 4  | 0  | 3  | 4  | 0  | 0   | 0   | 0   | 0   | 0   | 0   |
| E7  | 0  | 0  | 0  | 0  | 2  | 3  | 0  | 1  | 0  | 0   | 0   | 0   | 0   | 0   | 0   |
| E8  | 0  | 0  | 0  | 0  | 0  | 1  | 1  | 0  | 0  | 0   | 0   | 0   | 0   | 0   | 0   |
| E9  | 0  | 0  | 0  | 0  | 0  | 0  | 0  | 0  | 0  | 0   | 4   | 4   | 0   | 0   | 0   |
| E10 | 0  | 0  | 0  | 0  | 0  | 0  | 0  | 0  | 1  | 0   | 2   | 2   | 0   | 0   | 0   |
| E11 | 0  | 0  | 0  | 0  | 0  | 0  | 0  | 0  | 4  | 4   | 0   | 0   | 0   | 0   | 0   |
| E12 | 0  | 0  | 0  | 0  | 0  | 0  | 0  | 0  | 0  | 1   | 0   | 0   | 0   | 0   | 0   |
| E13 | 0  | 0  | 0  | 0  | 0  | 0  | 0  | 0  | 0  | 0   | 0   | 0   | 0   | 4   | 4   |
| E14 | 0  | 0  | 0  | 0  | 0  | 0  | 0  | 0  | 0  | 0   | 0   | 0   | 0   | 0   | 1   |
| E15 | 0  | 0  | 0  | 0  | 0  | 0  | 0  | 0  | 0  | 0   | 0   | 0   | 4   | 0   | 0   |

Table S91. Case 24. Weighted Supermatrix and Priorities, according to procedure 1.

|     | E1    | E2    | E3    | E4    | E5    | E6    | E7    | E8    | E9    | E10   | E11   | E12   | E13   | E14   | E15   | Priorities |
|-----|-------|-------|-------|-------|-------|-------|-------|-------|-------|-------|-------|-------|-------|-------|-------|------------|
| E1  | 0.000 | 0.000 | 0.125 | 0.125 | 0.000 | 0.000 | 0.000 | 0.000 | 0.000 | 0.000 | 0.000 | 0.000 | 0.000 | 0.000 | 0.000 | 0.030      |
| E2  | 0.000 | 0.000 | 0.000 | 0.000 | 0.000 | 0.000 | 0.000 | 0.000 | 0.000 | 0.000 | 0.000 | 0.000 | 0.000 | 0.000 | 0.000 | 0.000      |
| E3  | 0.875 | 0.875 | 0.000 | 0.875 | 0.000 | 0.000 | 0.000 | 0.000 | 0.000 | 0.000 | 0.000 | 0.000 | 0.000 | 0.000 | 0.000 | 0.124      |
| E4  | 0.125 | 0.125 | 0.875 | 0.000 | 0.000 | 0.000 | 0.000 | 0.000 | 0.000 | 0.000 | 0.000 | 0.000 | 0.000 | 0.000 | 0.000 | 0.113      |
| E5  | 0.000 | 0.000 | 0.000 | 0.000 | 0.000 | 0.649 | 0.649 | 0.000 | 0.000 | 0.000 | 0.000 | 0.000 | 0.000 | 0.000 | 0.000 | 0.101      |
| E6  | 0.000 | 0.000 | 0.000 | 0.000 | 0.833 | 0.000 | 0.279 | 0.875 | 0.000 | 0.000 | 0.000 | 0.000 | 0.000 | 0.000 | 0.000 | 0.107      |
| E7  | 0.000 | 0.000 | 0.000 | 0.000 | 0.167 | 0.279 | 0.000 | 0.125 | 0.000 | 0.000 | 0.000 | 0.000 | 0.000 | 0.000 | 0.000 | 0.048      |
| E8  | 0.000 | 0.000 | 0.000 | 0.000 | 0.000 | 0.072 | 0.072 | 0.000 | 0.000 | 0.000 | 0.000 | 0.000 | 0.000 | 0.000 | 0.000 | 0.011      |
| E9  | 0.000 | 0.000 | 0.000 | 0.000 | 0.000 | 0.000 | 0.000 | 0.000 | 0.000 | 0.000 | 0.833 | 0.833 | 0.000 | 0.000 | 0.000 | 0.106      |
| E10 | 0.000 | 0.000 | 0.000 | 0.000 | 0.000 | 0.000 | 0.000 | 0.000 | 0.125 | 0.000 | 0.167 | 0.167 | 0.000 | 0.000 | 0.000 | 0.034      |
| E11 | 0.000 | 0.000 | 0.000 | 0.000 | 0.000 | 0.000 | 0.000 | 0.000 | 0.875 | 0.875 | 0.000 | 0.000 | 0.000 | 0.000 | 0.000 | 0.122      |
| E12 | 0.000 | 0.000 | 0.000 | 0.000 | 0.000 | 0.000 | 0.000 | 0.000 | 0.000 | 0.125 | 0.000 | 0.000 | 0.000 | 0.000 | 0.000 | 0.004      |
| E13 | 0.000 | 0.000 | 0.000 | 0.000 | 0.000 | 0.000 | 0.000 | 0.000 | 0.000 | 0.000 | 0.000 | 0.000 | 0.000 | 1.000 | 0.875 | 0.094      |
| E14 | 0.000 | 0.000 | 0.000 | 0.000 | 0.000 | 0.000 | 0.000 | 0.000 | 0.000 | 0.000 | 0.000 | 0.000 | 0.000 | 0.000 | 0.125 | 0.012      |
| E15 | 0.000 | 0.000 | 0.000 | 0.000 | 0.000 | 0.000 | 0.000 | 0.000 | 0.000 | 0.000 | 0.000 | 0.000 | 1.000 | 0.000 | 0.000 | 0.094      |

Table S92. Case 24. Weighted Supermatrix and Priorities, according to procedure 2.

|     | E1    | E2    | E3    | E4    | E5    | E6    | E7    | E8    | E9    | E10   | E11   | E12   | E13   | E14   | E15   | Priorities |
|-----|-------|-------|-------|-------|-------|-------|-------|-------|-------|-------|-------|-------|-------|-------|-------|------------|
| E1  | 0.039 | 0.039 | 0.112 | 0.112 | 0.036 | 0.031 | 0.031 | 0.039 | 0.039 | 0.039 | 0.036 | 0.036 | 0.043 | 0.043 | 0.039 | 0.050      |
| E2  | 0.039 | 0.039 | 0.039 | 0.039 | 0.036 | 0.031 | 0.031 | 0.039 | 0.039 | 0.039 | 0.036 | 0.036 | 0.043 | 0.043 | 0.039 | 0.038      |
| E3  | 0.381 | 0.381 | 0.039 | 0.381 | 0.036 | 0.031 | 0.031 | 0.039 | 0.039 | 0.039 | 0.036 | 0.036 | 0.043 | 0.043 | 0.039 | 0.093      |
| E4  | 0.112 | 0.112 | 0.381 | 0.039 | 0.036 | 0.031 | 0.031 | 0.039 | 0.039 | 0.039 | 0.036 | 0.036 | 0.043 | 0.043 | 0.039 | 0.076      |
| E5  | 0.039 | 0.039 | 0.039 | 0.039 | 0.036 | 0.325 | 0.325 | 0.039 | 0.039 | 0.039 | 0.036 | 0.036 | 0.043 | 0.043 | 0.039 | 0.086      |
| E6  | 0.039 | 0.039 | 0.039 | 0.039 | 0.360 | 0.031 | 0.221 | 0.381 | 0.039 | 0.039 | 0.036 | 0.036 | 0.043 | 0.043 | 0.039 | 0.095      |
| E7  | 0.039 | 0.039 | 0.039 | 0.039 | 0.172 | 0.221 | 0.031 | 0.112 | 0.039 | 0.039 | 0.036 | 0.036 | 0.043 | 0.043 | 0.039 | 0.071      |
| E8  | 0.039 | 0.039 | 0.039 | 0.039 | 0.036 | 0.085 | 0.085 | 0.039 | 0.039 | 0.039 | 0.036 | 0.036 | 0.043 | 0.043 | 0.039 | 0.046      |
| E9  | 0.039 | 0.039 | 0.039 | 0.039 | 0.036 | 0.031 | 0.031 | 0.039 | 0.039 | 0.039 | 0.360 | 0.360 | 0.043 | 0.043 | 0.039 | 0.079      |
| E10 | 0.039 | 0.039 | 0.039 | 0.039 | 0.036 | 0.031 | 0.031 | 0.039 | 0.112 | 0.039 | 0.172 | 0.172 | 0.043 | 0.043 | 0.039 | 0.061      |
| E11 | 0.039 | 0.039 | 0.039 | 0.039 | 0.036 | 0.031 | 0.031 | 0.039 | 0.381 | 0.381 | 0.036 | 0.036 | 0.043 | 0.043 | 0.039 | 0.085      |
| E12 | 0.039 | 0.039 | 0.039 | 0.039 | 0.036 | 0.031 | 0.031 | 0.039 | 0.039 | 0.112 | 0.036 | 0.036 | 0.043 | 0.043 | 0.039 | 0.042      |
| E13 | 0.039 | 0.039 | 0.039 | 0.039 | 0.036 | 0.031 | 0.031 | 0.039 | 0.039 | 0.039 | 0.036 | 0.036 | 0.043 | 0.391 | 0.381 | 0.074      |
| E14 | 0.039 | 0.039 | 0.039 | 0.039 | 0.036 | 0.031 | 0.031 | 0.039 | 0.039 | 0.039 | 0.036 | 0.036 | 0.043 | 0.043 | 0.112 | 0.042      |
| E15 | 0.039 | 0.039 | 0.039 | 0.039 | 0.036 | 0.031 | 0.031 | 0.039 | 0.039 | 0.039 | 0.036 | 0.036 | 0.391 | 0.043 | 0.039 | 0.063      |

Table S93. Case 25. Original Weighted Supermatrix and Priorities.

|     | E1    | E2    | E3    | E4    | E5    | E6    | E7    | E8    | E9    | E10   | E11   | E12   | E13   | E14   | E15   | E16   | E17   | E18   | Priorities |
|-----|-------|-------|-------|-------|-------|-------|-------|-------|-------|-------|-------|-------|-------|-------|-------|-------|-------|-------|------------|
| E1  | 0.027 | 0.024 | 0.044 | 0.040 | 0.025 | 0.028 | 0.028 | 0.046 | 0.019 | 0.163 | 0.021 | 0.034 | 0.043 | 0.000 | 0.028 | 0.053 | 0.021 | 0.056 | 0.031      |
| E2  | 0.085 | 0.072 | 0.107 | 0.081 | 0.054 | 0.059 | 0.110 | 0.050 | 0.065 | 0.054 | 0.042 | 0.045 | 0.051 | 0.000 | 0.119 | 0.060 | 0.084 | 0.082 | 0.068      |
| E3  | 0.066 | 0.048 | 0.065 | 0.045 | 0.040 | 0.048 | 0.044 | 0.217 | 0.093 | 0.042 | 0.041 | 0.044 | 0.057 | 0.000 | 0.030 | 0.052 | 0.064 | 0.050 | 0.045      |
| E4  | 0.058 | 0.129 | 0.045 | 0.111 | 0.149 | 0.132 | 0.067 | 0.046 | 0.041 | 0.054 | 0.113 | 0.043 | 0.064 | 0.000 | 0.070 | 0.095 | 0.093 | 0.051 | 0.077      |
| E5  | 0.045 | 0.023 | 0.034 | 0.038 | 0.039 | 0.021 | 0.036 | 0.046 | 0.023 | 0.054 | 0.022 | 0.087 | 0.042 | 0.000 | 0.036 | 0.032 | 0.028 | 0.045 | 0.037      |
| E6  | 0.049 | 0.056 | 0.056 | 0.038 | 0.040 | 0.059 | 0.055 | 0.052 | 0.026 | 0.066 | 0.038 | 0.033 | 0.052 | 0.000 | 0.039 | 0.047 | 0.030 | 0.041 | 0.040      |
| E7  | 0.082 | 0.061 | 0.063 | 0.061 | 0.065 | 0.067 | 0.074 | 0.042 | 0.067 | 0.066 | 0.056 | 0.049 | 0.057 | 0.000 | 0.078 | 0.062 | 0.080 | 0.075 | 0.060      |
| E8  | 0.000 | 0.000 | 0.000 | 0.000 | 0.000 | 0.000 | 0.000 | 0.000 | 0.000 | 0.000 | 0.000 | 0.000 | 0.000 | 0.000 | 0.000 | 0.000 | 0.000 | 0.000 | 0.000      |
| E9  | 0.000 | 0.000 | 0.000 | 0.000 | 0.000 | 0.000 | 0.000 | 0.000 | 0.000 | 0.000 | 0.000 | 0.000 | 0.000 | 0.000 | 0.000 | 0.000 | 0.000 | 0.000 | 0.000      |
| E10 | 0.000 | 0.000 | 0.000 | 0.000 | 0.000 | 0.000 | 0.000 | 0.000 | 0.333 | 0.000 | 0.000 | 0.000 | 0.000 | 0.000 | 0.000 | 0.000 | 0.000 | 0.000 | 0.000      |
| E11 | 0.010 | 0.041 | 0.046 | 0.053 | 0.030 | 0.041 | 0.041 | 0.000 | 0.000 | 0.000 | 0.000 | 0.000 | 0.062 | 0.098 | 0.133 | 0.133 | 0.167 | 0.050 | 0.065      |
| E12 | 0.051 | 0.020 | 0.015 | 0.008 | 0.030 | 0.020 | 0.020 | 0.000 | 0.000 | 0.000 | 0.000 | 0.000 | 0.310 | 0.488 | 0.067 | 0.067 | 0.033 | 0.150 | 0.105      |
| E13 | 0.093 | 0.125 | 0.140 | 0.093 | 0.093 | 0.140 | 0.140 | 0.000 | 0.000 | 0.000 | 0.167 | 0.267 | 0.143 | 0.000 | 0.160 | 0.100 | 0.133 | 0.050 | 0.133      |
| E14 | 0.093 | 0.062 | 0.047 | 0.093 | 0.093 | 0.047 | 0.047 | 0.000 | 0.000 | 0.000 | 0.167 | 0.067 | 0.000 | 0.226 | 0.040 | 0.100 | 0.067 | 0.150 | 0.080      |
| E15 | 0.136 | 0.078 | 0.168 | 0.032 | 0.085 | 0.068 | 0.132 | 0.100 | 0.130 | 0.123 | 0.075 | 0.156 | 0.029 | 0.101 | 0.109 | 0.059 | 0.103 | 0.103 | 0.092      |
| E16 | 0.068 | 0.061 | 0.056 | 0.125 | 0.085 | 0.068 | 0.058 | 0.200 | 0.057 | 0.123 | 0.045 | 0.057 | 0.024 | 0.016 | 0.018 | 0.022 | 0.014 | 0.014 | 0.045      |
| E17 | 0.068 | 0.167 | 0.068 | 0.137 | 0.085 | 0.136 | 0.107 | 0.100 | 0.106 | 0.149 | 0.172 | 0.057 | 0.041 | 0.060 | 0.063 | 0.107 | 0.073 | 0.073 | 0.089      |
| E18 | 0.068 | 0.033 | 0.048 | 0.045 | 0.085 | 0.068 | 0.041 | 0.100 | 0.041 | 0.105 | 0.041 | 0.064 | 0.024 | 0.011 | 0.010 | 0.012 | 0.009 | 0.009 | 0.034      |



Table S96. Case 25. Weighted Supermatrix and Priorities, according to procedure 2.

|     | E1    | E2    | E3    | E4    | E5    | E6    | E7    | E8    | E9    | E10   | E11   | E12   | E13   | E14   | E15   | E16   | E17   | E18   | Priorities |
|-----|-------|-------|-------|-------|-------|-------|-------|-------|-------|-------|-------|-------|-------|-------|-------|-------|-------|-------|------------|
| E1  | 0.022 | 0.015 | 0.032 | 0.023 | 0.012 | 0.024 | 0.012 | 0.038 | 0.030 | 0.185 | 0.013 | 0.023 | 0.028 | 0.028 | 0.013 | 0.023 | 0.015 | 0.029 | 0.025      |
| E2  | 0.106 | 0.079 | 0.133 | 0.052 | 0.026 | 0.053 | 0.112 | 0.038 | 0.030 | 0.028 | 0.031 | 0.023 | 0.028 | 0.028 | 0.113 | 0.049 | 0.068 | 0.067 | 0.056      |
| E3  | 0.049 | 0.036 | 0.032 | 0.023 | 0.026 | 0.024 | 0.026 | 0.221 | 0.086 | 0.028 | 0.031 | 0.023 | 0.028 | 0.028 | 0.013 | 0.023 | 0.034 | 0.029 | 0.032      |
| E4  | 0.049 | 0.143 | 0.032 | 0.167 | 0.221 | 0.176 | 0.059 | 0.038 | 0.030 | 0.028 | 0.112 | 0.023 | 0.078 | 0.028 | 0.061 | 0.099 | 0.068 | 0.029 | 0.080      |
| E5  | 0.022 | 0.015 | 0.032 | 0.023 | 0.026 | 0.011 | 0.026 | 0.038 | 0.030 | 0.028 | 0.013 | 0.064 | 0.028 | 0.028 | 0.029 | 0.023 | 0.015 | 0.029 | 0.027      |
| E6  | 0.022 | 0.036 | 0.032 | 0.023 | 0.026 | 0.053 | 0.026 | 0.038 | 0.030 | 0.057 | 0.031 | 0.023 | 0.028 | 0.028 | 0.029 | 0.023 | 0.015 | 0.029 | 0.028      |
| E7  | 0.106 | 0.036 | 0.032 | 0.052 | 0.063 | 0.053 | 0.059 | 0.015 | 0.030 | 0.057 | 0.031 | 0.023 | 0.028 | 0.028 | 0.061 | 0.049 | 0.068 | 0.067 | 0.045      |
| E8  | 0.011 | 0.015 | 0.013 | 0.011 | 0.012 | 0.011 | 0.012 | 0.015 | 0.030 | 0.013 | 0.013 | 0.023 | 0.028 | 0.028 | 0.013 | 0.011 | 0.015 | 0.013 | 0.017      |
| E9  | 0.011 | 0.015 | 0.013 | 0.011 | 0.012 | 0.011 | 0.012 | 0.015 | 0.030 | 0.013 | 0.013 | 0.023 | 0.028 | 0.028 | 0.013 | 0.011 | 0.015 | 0.013 | 0.017      |
| E10 | 0.011 | 0.015 | 0.013 | 0.011 | 0.012 | 0.011 | 0.012 | 0.015 | 0.325 | 0.013 | 0.013 | 0.023 | 0.028 | 0.028 | 0.013 | 0.011 | 0.015 | 0.013 | 0.022      |
| E11 | 0.011 | 0.036 | 0.032 | 0.023 | 0.026 | 0.024 | 0.026 | 0.015 | 0.030 | 0.013 | 0.013 | 0.023 | 0.078 | 0.078 | 0.192 | 0.180 | 0.226 | 0.029 | 0.077      |
| E12 | 0.022 | 0.015 | 0.013 | 0.011 | 0.026 | 0.011 | 0.012 | 0.015 | 0.030 | 0.013 | 0.013 | 0.023 | 0.310 | 0.310 | 0.061 | 0.049 | 0.015 | 0.203 | 0.091      |
| E13 | 0.106 | 0.143 | 0.211 | 0.095 | 0.129 | 0.176 | 0.191 | 0.015 | 0.030 | 0.013 | 0.180 | 0.299 | 0.144 | 0.028 | 0.192 | 0.099 | 0.134 | 0.029 | 0.143      |
| E14 | 0.106 | 0.036 | 0.032 | 0.095 | 0.129 | 0.024 | 0.026 | 0.015 | 0.030 | 0.013 | 0.180 | 0.064 | 0.028 | 0.144 | 0.029 | 0.099 | 0.068 | 0.203 | 0.074      |
| E15 | 0.199 | 0.079 | 0.211 | 0.023 | 0.063 | 0.053 | 0.191 | 0.082 | 0.086 | 0.105 | 0.066 | 0.132 | 0.028 | 0.078 | 0.113 | 0.049 | 0.134 | 0.125 | 0.091      |
| E16 | 0.049 | 0.036 | 0.032 | 0.167 | 0.063 | 0.053 | 0.059 | 0.221 | 0.030 | 0.105 | 0.031 | 0.064 | 0.028 | 0.028 | 0.013 | 0.011 | 0.015 | 0.013 | 0.048      |
| E17 | 0.049 | 0.234 | 0.077 | 0.167 | 0.063 | 0.176 | 0.112 | 0.082 | 0.086 | 0.185 | 0.180 | 0.064 | 0.028 | 0.028 | 0.029 | 0.180 | 0.068 | 0.067 | 0.094      |
| E18 | 0.049 | 0.015 | 0.032 | 0.023 | 0.063 | 0.053 | 0.026 | 0.082 | 0.030 | 0.105 | 0.031 | 0.064 | 0.028 | 0.028 | 0.013 | 0.011 | 0.015 | 0.013 | 0.031      |

Table S97. Case 26. Original Weighted Supermatrix and Priorities.

|    | E1    | E2    | E3    | E4    | E5    | E6    | E7    | E8    | E9    | Priorities |
|----|-------|-------|-------|-------|-------|-------|-------|-------|-------|------------|
| E1 | 0.000 | 0.000 | 0.000 | 0.000 | 0.554 | 0.429 | 0.150 | 0.600 | 0.370 | 0.229      |
| E2 | 0.000 | 0.000 | 0.000 | 0.000 | 0.221 | 0.266 | 0.050 | 0.200 | 0.345 | 0.113      |
| E3 | 0.000 | 0.000 | 0.000 | 0.000 | 0.111 | 0.189 | 0.026 | 0.100 | 0.185 | 0.061      |
| E4 | 0.000 | 0.000 | 0.000 | 0.000 | 0.115 | 0.116 | 0.024 | 0.100 | 0.100 | 0.049      |
| E5 | 0.400 | 0.375 | 0.375 | 0.250 | 0.000 | 0.000 | 0.188 | 0.000 | 0.000 | 0.193      |
| E6 | 0.100 | 0.125 | 0.125 | 0.250 | 0.000 | 0.000 | 0.063 | 0.000 | 0.000 | 0.065      |
| E7 | 0.324 | 0.214 | 0.333 | 0.167 | 0.000 | 0.000 | 0.000 | 0.000 | 0.000 | 0.127      |
| E8 | 0.061 | 0.071 | 0.083 | 0.167 | 0.000 | 0.000 | 0.250 | 0.000 | 0.000 | 0.067      |
| E9 | 0.115 | 0.214 | 0.083 | 0.167 | 0.000 | 0.000 | 0.250 | 0.000 | 0.000 | 0.096      |

Table S98. Case 26's X Influence Matrix.

|    | E1 | E2 | E3 | E4 | E5 | E6 | E7 | E8 | E9 |
|----|----|----|----|----|----|----|----|----|----|
| E1 | 0  | 0  | 0  | 0  | 4  | 4  | 2  | 4  | 4  |
| E2 | 0  | 0  | 0  | 0  | 1  | 3  | 1  | 1  | 4  |
| E3 | 0  | 0  | 0  | 0  | 0  | 2  | 0  | 0  | 2  |
| E4 | 0  | 0  | 0  | 0  | 1  | 1  | 0  | 0  | 1  |
| E5 | 4  | 4  | 4  | 4  | 0  | 0  | 3  | 0  | 0  |
| E6 | 1  | 1  | 1  | 4  | 0  | 0  | 1  | 0  | 0  |
| E7 | 4  | 2  | 4  | 3  | 0  | 0  | 0  | 0  | 0  |
| E8 | 0  | 0  | 1  | 3  | 0  | 0  | 4  | 0  | 0  |
| E9 | 1  | 2  | 1  | 3  | 0  | 0  | 4  | 0  | 0  |

Table S99. Case 26. Weighted Supermatrix and Priorities, according to procedure 1.

|    | E1    | E2    | E3    | E4    | E5    | E6    | E7    | E8    | E9    | Priorities |
|----|-------|-------|-------|-------|-------|-------|-------|-------|-------|------------|
| E1 | 0.000 | 0.000 | 0.000 | 0.000 | 0.778 | 0.565 | 0.081 | 0.875 | 0.423 | 0.300      |
| E2 | 0.000 | 0.000 | 0.000 | 0.000 | 0.111 | 0.262 | 0.038 | 0.125 | 0.423 | 0.086      |
| E3 | 0.000 | 0.000 | 0.000 | 0.000 | 0.000 | 0.118 | 0.000 | 0.000 | 0.104 | 0.014      |
| E4 | 0.000 | 0.000 | 0.000 | 0.000 | 0.111 | 0.055 | 0.000 | 0.000 | 0.051 | 0.032      |
| E5 | 0.438 | 0.635 | 0.412 | 0.333 | 0.000 | 0.000 | 0.163 | 0.000 | 0.000 | 0.228      |
| E6 | 0.063 | 0.062 | 0.059 | 0.333 | 0.000 | 0.000 | 0.038 | 0.000 | 0.000 | 0.041      |
| E7 | 0.438 | 0.151 | 0.412 | 0.111 | 0.000 | 0.000 | 0.000 | 0.000 | 0.000 | 0.154      |
| E8 | 0.000 | 0.000 | 0.059 | 0.111 | 0.000 | 0.000 | 0.340 | 0.000 | 0.000 | 0.057      |
| E9 | 0.063 | 0.151 | 0.059 | 0.111 | 0.000 | 0.000 | 0.340 | 0.000 | 0.000 | 0.088      |

Table S100. Case 26. Weighted Supermatrix and Priorities, according to procedure 2.

|    | E1    | E2    | E3    | E4    | E5    | E6    | E7    | E8    | E9    | Priorities |
|----|-------|-------|-------|-------|-------|-------|-------|-------|-------|------------|
| E1 | 0.031 | 0.033 | 0.028 | 0.022 | 0.498 | 0.397 | 0.092 | 0.511 | 0.331 | 0.220      |
| E2 | 0.031 | 0.033 | 0.028 | 0.022 | 0.120 | 0.239 | 0.046 | 0.139 | 0.331 | 0.102      |
| E3 | 0.031 | 0.033 | 0.028 | 0.022 | 0.044 | 0.138 | 0.021 | 0.050 | 0.127 | 0.050      |
| E4 | 0.031 | 0.033 | 0.028 | 0.022 | 0.120 | 0.073 | 0.021 | 0.050 | 0.068 | 0.054      |
| E5 | 0.345 | 0.439 | 0.340 | 0.267 | 0.044 | 0.030 | 0.164 | 0.050 | 0.029 | 0.192      |
| E6 | 0.078 | 0.080 | 0.069 | 0.267 | 0.044 | 0.030 | 0.046 | 0.050 | 0.029 | 0.067      |
| E7 | 0.345 | 0.158 | 0.340 | 0.127 | 0.044 | 0.030 | 0.021 | 0.050 | 0.029 | 0.136      |
| E8 | 0.031 | 0.033 | 0.069 | 0.127 | 0.044 | 0.030 | 0.294 | 0.050 | 0.029 | 0.078      |
| E9 | 0.078 | 0.158 | 0.069 | 0.127 | 0.044 | 0.030 | 0.294 | 0.050 | 0.029 | 0.101      |

Table S101. Case 27. Original Weighted Supermatrix and Priorities.

|     | E1    | E2    | E3    | E4    | E5    | E6    | E7    | E8    | E9    | E10   | E11   | E12   | Priorities |
|-----|-------|-------|-------|-------|-------|-------|-------|-------|-------|-------|-------|-------|------------|
| E1  | 0.000 | 0.000 | 0.000 | 0.000 | 0.000 | 0.000 | 0.000 | 0.070 | 0.107 | 0.127 | 0.106 | 0.184 | 0.055      |
| E2  | 0.000 | 0.000 | 0.000 | 0.000 | 0.000 | 0.000 | 0.000 | 0.217 | 0.255 | 0.071 | 0.059 | 0.073 | 0.063      |
| E3  | 0.000 | 0.000 | 0.000 | 0.000 | 0.000 | 0.000 | 0.000 | 0.034 | 0.039 | 0.422 | 0.250 | 0.382 | 0.104      |
| E4  | 0.000 | 0.000 | 0.000 | 0.000 | 0.000 | 0.000 | 0.000 | 0.037 | 0.058 | 0.241 | 0.042 | 0.124 | 0.039      |
| E5  | 0.000 | 0.000 | 0.000 | 0.000 | 0.000 | 0.000 | 0.000 | 0.272 | 0.175 | 0.032 | 0.322 | 0.041 | 0.108      |
| E6  | 0.000 | 0.000 | 0.000 | 0.000 | 0.000 | 0.000 | 0.000 | 0.144 | 0.187 | 0.051 | 0.196 | 0.150 | 0.078      |
| E7  | 0.000 | 0.000 | 0.000 | 0.000 | 0.000 | 0.000 | 0.000 | 0.227 | 0.180 | 0.057 | 0.026 | 0.046 | 0.052      |
| E8  | 0.251 | 0.488 | 0.058 | 0.121 | 0.276 | 0.274 | 0.520 | 0.000 | 0.000 | 0.000 | 0.000 | 0.000 | 0.134      |
| E9  | 0.099 | 0.196 | 0.087 | 0.088 | 0.092 | 0.091 | 0.171 | 0.000 | 0.000 | 0.000 | 0.000 | 0.000 | 0.056      |
| E10 | 0.111 | 0.053 | 0.223 | 0.372 | 0.040 | 0.053 | 0.092 | 0.000 | 0.000 | 0.000 | 0.000 | 0.000 | 0.061      |
| E11 | 0.351 | 0.164 | 0.412 | 0.217 | 0.518 | 0.456 | 0.086 | 0.000 | 0.000 | 0.000 | 0.000 | 0.000 | 0.177      |
| E12 | 0.188 | 0.099 | 0.220 | 0.202 | 0.073 | 0.125 | 0.130 | 0.000 | 0.000 | 0.000 | 0.000 | 0.000 | 0.072      |

Table S102. Case 27's X Influence Matrix.

|     | E1 | E2 | E3 | E4 | E5 | E6 | E7 | E8 | E9 | E10 | E11 | E12 |
|-----|----|----|----|----|----|----|----|----|----|-----|-----|-----|
| E1  | 0  | 0  | 0  | 0  | 0  | 0  | 0  | 1  | 2  | 1   | 1   | 2   |
| E2  | 0  | 0  | 0  | 0  | 0  | 0  | 0  | 3  | 4  | 0   | 0   | 0   |
| E3  | 0  | 0  | 0  | 0  | 0  | 0  | 0  | 0  | 0  | 4   | 3   | 4   |
| E4  | 0  | 0  | 0  | 0  | 0  | 0  | 0  | 0  | 1  | 2   | 0   | 1   |
| E5  | 0  | 0  | 0  | 0  | 0  | 0  | 0  | 4  | 3  | 0   | 4   | 0   |
| E6  | 0  | 0  | 0  | 0  | 0  | 0  | 0  | 2  | 3  | 0   | 3   | 1   |
| E7  | 0  | 0  | 0  | 0  | 0  | 0  | 0  | 4  | 3  | 0   | 0   | 0   |
| E8  | 3  | 4  | 0  | 1  | 2  | 3  | 4  | 0  | 0  | 0   | 0   | 0   |
| E9  | 1  | 2  | 1  | 1  | 0  | 1  | 1  | 0  | 0  | 0   | 0   | 0   |
| E10 | 1  | 0  | 2  | 4  | 0  | 0  | 0  | 0  | 0  | 0   | 0   | 0   |
| E11 | 4  | 1  | 4  | 2  | 4  | 4  | 0  | 0  | 0  | 0   | 0   | 0   |
| E12 | 2  | 1  | 2  | 2  | 0  | 1  | 1  | 0  | 0  | 0   | 0   | 0   |

Table S103. Case 27. Weighted Supermatrix and Priorities, according to procedure 1.

|     | E1    | E2    | E3    | E4    | E5    | E6    | E7    | E8    | E9    | E10   | E11   | E12   | Priorities |
|-----|-------|-------|-------|-------|-------|-------|-------|-------|-------|-------|-------|-------|------------|
| E1  | 0.000 | 0.000 | 0.000 | 0.000 | 0.000 | 0.000 | 0.000 | 0.039 | 0.068 | 0.081 | 0.052 | 0.191 | 0.030      |
| E2  | 0.000 | 0.000 | 0.000 | 0.000 | 0.000 | 0.000 | 0.000 | 0.161 | 0.403 | 0.000 | 0.000 | 0.000 | 0.029      |
| E3  | 0.000 | 0.000 | 0.000 | 0.000 | 0.000 | 0.000 | 0.000 | 0.000 | 0.000 | 0.731 | 0.210 | 0.657 | 0.100      |
| E4  | 0.000 | 0.000 | 0.000 | 0.000 | 0.000 | 0.000 | 0.000 | 0.000 | 0.035 | 0.188 | 0.000 | 0.076 | 0.007      |
| E5  | 0.000 | 0.000 | 0.000 | 0.000 | 0.000 | 0.000 | 0.000 | 0.362 | 0.165 | 0.000 | 0.528 | 0.000 | 0.207      |
| E6  | 0.000 | 0.000 | 0.000 | 0.000 | 0.000 | 0.000 | 0.000 | 0.076 | 0.165 | 0.000 | 0.210 | 0.076 | 0.079      |
| E7  | 0.000 | 0.000 | 0.000 | 0.000 | 0.000 | 0.000 | 0.000 | 0.362 | 0.165 | 0.000 | 0.000 | 0.000 | 0.048      |
| E8  | 0.258 | 0.657 | 0.000 | 0.059 | 0.167 | 0.282 | 0.778 | 0.000 | 0.000 | 0.000 | 0.000 | 0.000 | 0.122      |
| E9  | 0.053 | 0.191 | 0.062 | 0.059 | 0.000 | 0.067 | 0.111 | 0.000 | 0.000 | 0.000 | 0.000 | 0.000 | 0.025      |
| E10 | 0.053 | 0.000 | 0.151 | 0.576 | 0.000 | 0.000 | 0.000 | 0.000 | 0.000 | 0.000 | 0.000 | 0.000 | 0.021      |
| E11 | 0.514 | 0.076 | 0.635 | 0.153 | 0.833 | 0.583 | 0.000 | 0.000 | 0.000 | 0.000 | 0.000 | 0.000 | 0.300      |
| E12 | 0.122 | 0.076 | 0.151 | 0.153 | 0.000 | 0.067 | 0.111 | 0.000 | 0.000 | 0.000 | 0.000 | 0.000 | 0.033      |

Table S104. Case 27. Weighted Supermatrix and Priorities, according to procedure 2.

|     | E1    | E2    | E3    | E4    | E5    | E6    | E7    | E8    | E9    | E10   | E11   | E12   | Priorities |
|-----|-------|-------|-------|-------|-------|-------|-------|-------|-------|-------|-------|-------|------------|
| E1  | 0.026 | 0.032 | 0.030 | 0.028 | 0.040 | 0.030 | 0.039 | 0.054 | 0.085 | 0.097 | 0.070 | 0.170 | 0.057      |
| E2  | 0.026 | 0.032 | 0.030 | 0.028 | 0.040 | 0.030 | 0.039 | 0.161 | 0.285 | 0.036 | 0.027 | 0.032 | 0.063      |
| E3  | 0.026 | 0.032 | 0.030 | 0.028 | 0.040 | 0.030 | 0.039 | 0.022 | 0.020 | 0.402 | 0.194 | 0.395 | 0.103      |
| E4  | 0.026 | 0.032 | 0.030 | 0.028 | 0.040 | 0.030 | 0.039 | 0.022 | 0.047 | 0.178 | 0.027 | 0.088 | 0.044      |
| E5  | 0.026 | 0.032 | 0.030 | 0.028 | 0.040 | 0.030 | 0.039 | 0.266 | 0.154 | 0.036 | 0.323 | 0.032 | 0.116      |
| E6  | 0.026 | 0.032 | 0.030 | 0.028 | 0.040 | 0.030 | 0.039 | 0.097 | 0.154 | 0.036 | 0.194 | 0.088 | 0.078      |
| E7  | 0.026 | 0.032 | 0.030 | 0.028 | 0.040 | 0.030 | 0.039 | 0.266 | 0.154 | 0.036 | 0.027 | 0.032 | 0.068      |
| E8  | 0.216 | 0.395 | 0.030 | 0.072 | 0.188 | 0.235 | 0.426 | 0.022 | 0.020 | 0.036 | 0.027 | 0.032 | 0.125      |
| E9  | 0.066 | 0.170 | 0.079 | 0.072 | 0.040 | 0.081 | 0.111 | 0.022 | 0.020 | 0.036 | 0.027 | 0.032 | 0.057      |
| E10 | 0.066 | 0.032 | 0.150 | 0.373 | 0.040 | 0.030 | 0.039 | 0.022 | 0.020 | 0.036 | 0.027 | 0.032 | 0.060      |
| E11 | 0.341 | 0.088 | 0.378 | 0.144 | 0.411 | 0.360 | 0.039 | 0.022 | 0.020 | 0.036 | 0.027 | 0.032 | 0.162      |
| E12 | 0.128 | 0.088 | 0.150 | 0.144 | 0.040 | 0.081 | 0.111 | 0.022 | 0.020 | 0.036 | 0.027 | 0.032 | 0.066      |

Table S105. Case 28. Original Weighted Supermatrix and Priorities.

|     | E1    | E2    | E3    | E4    | E5    | E6    | E7    | E8    | E9    | E10   | Priorities |
|-----|-------|-------|-------|-------|-------|-------|-------|-------|-------|-------|------------|
| E1  | 0.000 | 0.000 | 0.000 | 0.066 | 0.029 | 0.167 | 0.124 | 0.244 | 0.242 | 0.050 | 0.085      |
| E2  | 0.190 | 0.000 | 0.000 | 0.022 | 0.125 | 0.265 | 0.196 | 0.687 | 0.385 | 0.080 | 0.184      |
| E3  | 0.032 | 0.222 | 0.000 | 0.147 | 0.013 | 0.035 | 0.031 | 0.069 | 0.102 | 0.013 | 0.066      |
| E4  | 0.019 | 0.019 | 0.024 | 0.000 | 0.000 | 0.000 | 0.000 | 0.000 | 0.000 | 0.000 | 0.007      |
| E5  | 0.130 | 0.130 | 0.167 | 0.000 | 0.000 | 0.000 | 0.000 | 0.000 | 0.000 | 0.000 | 0.046      |
| E6  | 0.026 | 0.026 | 0.034 | 0.412 | 0.042 | 0.000 | 0.400 | 0.000 | 0.109 | 0.857 | 0.223      |
| E7  | 0.159 | 0.159 | 0.204 | 0.000 | 0.250 | 0.000 | 0.000 | 0.000 | 0.000 | 0.000 | 0.068      |
| E8  | 0.190 | 0.190 | 0.245 | 0.000 | 0.292 | 0.000 | 0.250 | 0.000 | 0.163 | 0.000 | 0.099      |
| E9  | 0.032 | 0.032 | 0.041 | 0.000 | 0.000 | 0.000 | 0.000 | 0.000 | 0.000 | 0.000 | 0.011      |
| E10 | 0.222 | 0.222 | 0.286 | 0.353 | 0.250 | 0.533 | 0.000 | 0.000 | 0.000 | 0.000 | 0.211      |

Table S106. Case 28's X Influence Matrix.

|     | E1 | E2 | E3 | E4 | E5 | E6 | E7 | E8 | E9 | E10 |
|-----|----|----|----|----|----|----|----|----|----|-----|
| E1  | 0  | 0  | 0  | 0  | 0  | 1  | 1  | 1  | 3  | 0   |
| E2  | 4  | 0  | 0  | 0  | 2  | 2  | 2  | 4  | 4  | 0   |
| E3  | 0  | 4  | 0  | 1  | 0  | 0  | 0  | 0  | 1  | 0   |
| E4  | 0  | 0  | 0  | 0  | 0  | 0  | 0  | 0  | 0  | 0   |
| E5  | 2  | 2  | 2  | 0  | 0  | 0  | 0  | 0  | 0  | 0   |
| E6  | 0  | 0  | 0  | 4  | 0  | 0  | 4  | 0  | 1  | 4   |
| E7  | 3  | 3  | 3  | 0  | 4  | 0  | 0  | 0  | 0  | 0   |
| E8  | 4  | 4  | 4  | 0  | 4  | 0  | 3  | 0  | 2  | 0   |
| E9  | 0  | 0  | 0  | 0  | 0  | 0  | 0  | 0  | 0  | 0   |
| E10 | 4  | 4  | 4  | 4  | 4  | 4  | 0  | 0  | 0  | 0   |

Table S107. Case 28. Weighted Supermatrix and Priorities, according to procedure 1.

|     | E1    | E2    | E3    | E4    | E5    | E6    | E7    | E8    | E9    | E10   | Priorities |
|-----|-------|-------|-------|-------|-------|-------|-------|-------|-------|-------|------------|
| E1  | 0.000 | 0.000 | 0.000 | 0.000 | 0.000 | 0.081 | 0.055 | 0.125 | 0.258 | 0.000 | 0.039      |
| E2  | 0.281 | 0.000 | 0.000 | 0.000 | 0.063 | 0.188 | 0.118 | 0.875 | 0.514 | 0.000 | 0.148      |
| E3  | 0.000 | 0.281 | 0.000 | 0.067 | 0.000 | 0.000 | 0.000 | 0.000 | 0.053 | 0.000 | 0.042      |
| E4  | 0.000 | 0.000 | 0.000 | 0.000 | 0.000 | 0.000 | 0.000 | 0.000 | 0.000 | 0.000 | 0.000      |
| E5  | 0.051 | 0.051 | 0.068 | 0.000 | 0.000 | 0.000 | 0.000 | 0.000 | 0.000 | 0.000 | 0.012      |
| E6  | 0.000 | 0.000 | 0.000 | 0.467 | 0.000 | 0.000 | 0.565 | 0.000 | 0.053 | 1.000 | 0.333      |
| E7  | 0.107 | 0.107 | 0.152 | 0.000 | 0.313 | 0.000 | 0.000 | 0.000 | 0.000 | 0.000 | 0.030      |
| E8  | 0.281 | 0.281 | 0.390 | 0.000 | 0.313 | 0.000 | 0.262 | 0.000 | 0.122 | 0.000 | 0.080      |
| E9  | 0.000 | 0.000 | 0.000 | 0.000 | 0.000 | 0.000 | 0.000 | 0.000 | 0.000 | 0.000 | 0.000      |
| E10 | 0.281 | 0.281 | 0.390 | 0.467 | 0.313 | 0.731 | 0.000 | 0.000 | 0.000 | 0.000 | 0.316      |

Table S108. Case 28. Weighted Supermatrix and Priorities, according to procedure 2.

|     | E1    | E2    | E3    | E4    | E5    | E6    | E7    | E8    | E9    | E10   | Priorities |
|-----|-------|-------|-------|-------|-------|-------|-------|-------|-------|-------|------------|
| E1  | 0.021 | 0.021 | 0.025 | 0.034 | 0.025 | 0.101 | 0.074 | 0.134 | 0.228 | 0.056 | 0.069      |
| E2  | 0.231 | 0.021 | 0.025 | 0.034 | 0.097 | 0.189 | 0.137 | 0.483 | 0.373 | 0.056 | 0.159      |
| E3  | 0.021 | 0.231 | 0.025 | 0.088 | 0.025 | 0.038 | 0.030 | 0.048 | 0.066 | 0.056 | 0.073      |
| E4  | 0.021 | 0.021 | 0.025 | 0.034 | 0.025 | 0.038 | 0.030 | 0.048 | 0.027 | 0.056 | 0.036      |
| E5  | 0.075 | 0.075 | 0.101 | 0.034 | 0.025 | 0.038 | 0.030 | 0.048 | 0.027 | 0.056 | 0.054      |
| E6  | 0.021 | 0.021 | 0.025 | 0.338 | 0.025 | 0.038 | 0.378 | 0.048 | 0.066 | 0.500 | 0.163      |
| E7  | 0.127 | 0.127 | 0.169 | 0.034 | 0.252 | 0.038 | 0.030 | 0.048 | 0.027 | 0.056 | 0.083      |
| E8  | 0.231 | 0.231 | 0.289 | 0.034 | 0.252 | 0.038 | 0.233 | 0.048 | 0.131 | 0.056 | 0.136      |
| E9  | 0.021 | 0.021 | 0.025 | 0.034 | 0.025 | 0.038 | 0.030 | 0.048 | 0.027 | 0.056 | 0.036      |
| E10 | 0.231 | 0.231 | 0.289 | 0.338 | 0.252 | 0.443 | 0.030 | 0.048 | 0.027 | 0.056 | 0.192      |

Table S109. Case 29. Original Weighted Supermatrix and Priorities.

|     | E1    | E2    | E3    | E4    | E5    | E6    | E7    | E8    | E9    | E10   | E11   | E12   | E13   | Priorities |
|-----|-------|-------|-------|-------|-------|-------|-------|-------|-------|-------|-------|-------|-------|------------|
| E1  | 0.000 | 0.000 | 0.000 | 0.000 | 0.000 | 0.000 | 0.000 | 0.000 | 0.000 | 0.164 | 0.000 | 0.038 | 0.066 | 0.022      |
| E2  | 0.137 | 0.000 | 0.038 | 0.018 | 0.000 | 0.000 | 0.216 | 0.000 | 0.000 | 0.151 | 0.048 | 0.000 | 0.000 | 0.061      |
| E3  | 0.595 | 0.086 | 0.000 | 0.078 | 0.000 | 0.000 | 0.000 | 0.000 | 0.000 | 0.180 | 0.158 | 0.122 | 0.140 | 0.061      |
| E4  | 0.269 | 0.034 | 0.081 | 0.000 | 0.000 | 0.000 | 0.256 | 0.000 | 0.000 | 0.000 | 0.000 | 0.000 | 0.000 | 0.058      |
| E5  | 0.000 | 0.000 | 0.000 | 0.000 | 0.000 | 0.059 | 0.216 | 0.000 | 0.000 | 0.000 | 0.000 | 0.000 | 0.000 | 0.045      |
| E6  | 0.000 | 0.089 | 0.094 | 0.069 | 0.071 | 0.000 | 0.313 | 0.082 | 0.259 | 0.000 | 0.000 | 0.293 | 0.000 | 0.128      |
| E7  | 0.000 | 0.347 | 0.342 | 0.281 | 0.155 | 0.168 | 0.000 | 0.335 | 0.435 | 0.000 | 0.000 | 0.127 | 0.000 | 0.175      |
| E8  | 0.000 | 0.181 | 0.197 | 0.142 | 0.104 | 0.104 | 0.000 | 0.000 | 0.139 | 0.205 | 0.000 | 0.210 | 0.288 | 0.109      |
| E9  | 0.000 | 0.000 | 0.000 | 0.000 | 0.000 | 0.281 | 0.000 | 0.111 | 0.000 | 0.300 | 0.284 | 0.000 | 0.255 | 0.098      |
| E10 | 0.000 | 0.264 | 0.247 | 0.215 | 0.281 | 0.000 | 0.000 | 0.073 | 0.167 | 0.000 | 0.258 | 0.210 | 0.000 | 0.104      |
| E11 | 0.000 | 0.000 | 0.000 | 0.000 | 0.182 | 0.182 | 0.000 | 0.000 | 0.000 | 0.000 | 0.000 | 0.000 | 0.077 | 0.034      |
| E12 | 0.000 | 0.000 | 0.000 | 0.105 | 0.206 | 0.206 | 0.000 | 0.163 | 0.000 | 0.000 | 0.144 | 0.000 | 0.174 | 0.070      |
| E13 | 0.000 | 0.000 | 0.000 | 0.092 | 0.000 | 0.000 | 0.000 | 0.236 | 0.000 | 0.000 | 0.107 | 0.000 | 0.000 | 0.035      |

Table S110. Case 29's X Influence Matrix.

|     | E1 | E2 | E3 | E4 | E5 | E6 | E7 | E8 | E9 | E10 | E11 | E12 | E13 |
|-----|----|----|----|----|----|----|----|----|----|-----|-----|-----|-----|
| E1  | 0  | 0  | 0  | 0  | 0  | 0  | 0  | 0  | 0  | 2   | 0   | 0   | 1   |
| E2  | 1  | 0  | 0  | 0  | 0  | 0  | 3  | 0  | 0  | 2   | 0   | 0   | 0   |
| E3  | 4  | 1  | 0  | 1  | 0  | 0  | 0  | 0  | 0  | 3   | 2   | 2   | 2   |
| E4  | 2  | 0  | 1  | 0  | 0  | 0  | 4  | 0  | 0  | 0   | 0   | 0   | 0   |
| E5  | 0  | 0  | 0  | 0  | 0  | 1  | 3  | 0  | 0  | 0   | 0   | 0   | 0   |
| E6  | 0  | 1  | 1  | 1  | 1  | 0  | 4  | 1  | 2  | 0   | 0   | 4   | 0   |
| E7  | 0  | 4  | 4  | 4  | 2  | 2  | 0  | 4  | 4  | 0   | 0   | 2   | 0   |
| E8  | 0  | 2  | 2  | 2  | 1  | 1  | 0  | 0  | 1  | 3   | 0   | 3   | 4   |
| E9  | 0  | 0  | 0  | 0  | 0  | 4  | 0  | 1  | 0  | 4   | 4   | 0   | 4   |
| E10 | 0  | 3  | 3  | 3  | 4  | 0  | 0  | 1  | 1  | 0   | 4   | 3   | 0   |
| E11 | 0  | 0  | 0  | 0  | 3  | 3  | 0  | 0  | 0  | 0   | 0   | 0   | 1   |
| E12 | 0  | 0  | 0  | 1  | 3  | 3  | 0  | 2  | 0  | 0   | 2   | 0   | 3   |
| E13 | 0  | 0  | 0  | 1  | 0  | 0  | 0  | 3  | 0  | 0   | 1   | 0   | 0   |

Table S111. Case 29. Weighted Supermatrix and Priorities, according to procedure 1.



|     | E1    | E2    | E3    | E4    | E5    | E6    | E7    | E8    | E9    | E10   | E11   | E12   | E13   | Priorities |
|-----|-------|-------|-------|-------|-------|-------|-------|-------|-------|-------|-------|-------|-------|------------|
| E1  | 0.000 | 0.000 | 0.000 | 0.000 | 0.000 | 0.000 | 0.000 | 0.000 | 0.000 | 0.073 | 0.000 | 0.000 | 0.038 | 0.008      |
| E2  | 0.081 | 0.000 | 0.000 | 0.000 | 0.000 | 0.000 | 0.125 | 0.000 | 0.000 | 0.073 | 0.000 | 0.000 | 0.000 | 0.035      |
| E3  | 0.731 | 0.053 | 0.000 | 0.049 | 0.000 | 0.000 | 0.000 | 0.000 | 0.000 | 0.194 | 0.091 | 0.073 | 0.081 | 0.040      |
| E4  | 0.188 | 0.000 | 0.053 | 0.000 | 0.000 | 0.000 | 0.375 | 0.000 | 0.000 | 0.000 | 0.000 | 0.000 | 0.000 | 0.087      |
| E5  | 0.000 | 0.000 | 0.000 | 0.000 | 0.000 | 0.041 | 0.125 | 0.000 | 0.000 | 0.000 | 0.000 | 0.000 | 0.000 | 0.034      |
| E6  | 0.000 | 0.053 | 0.053 | 0.049 | 0.041 | 0.000 | 0.375 | 0.051 | 0.191 | 0.000 | 0.000 | 0.466 | 0.000 | 0.149      |
| E7  | 0.000 | 0.514 | 0.514 | 0.440 | 0.090 | 0.090 | 0.000 | 0.474 | 0.657 | 0.000 | 0.000 | 0.073 | 0.000 | 0.222      |
| E8  | 0.000 | 0.122 | 0.122 | 0.123 | 0.041 | 0.041 | 0.000 | 0.000 | 0.076 | 0.194 | 0.000 | 0.194 | 0.340 | 0.076      |
| E9  | 0.000 | 0.000 | 0.000 | 0.000 | 0.000 | 0.430 | 0.000 | 0.051 | 0.000 | 0.466 | 0.388 | 0.000 | 0.340 | 0.135      |
| E10 | 0.000 | 0.258 | 0.258 | 0.242 | 0.430 | 0.000 | 0.000 | 0.051 | 0.076 | 0.000 | 0.388 | 0.194 | 0.000 | 0.095      |
| E11 | 0.000 | 0.000 | 0.000 | 0.000 | 0.199 | 0.199 | 0.000 | 0.000 | 0.000 | 0.000 | 0.000 | 0.000 | 0.038 | 0.037      |
| E12 | 0.000 | 0.000 | 0.000 | 0.049 | 0.199 | 0.199 | 0.000 | 0.123 | 0.000 | 0.000 | 0.091 | 0.000 | 0.163 | 0.057      |
| E13 | 0.000 | 0.000 | 0.000 | 0.049 | 0.000 | 0.000 | 0.000 | 0.251 | 0.000 | 0.000 | 0.042 | 0.000 | 0.000 | 0.025      |

Table S112. Case 29. Weighted Supermatrix and Priorities, according to procedure 2.

|     | E1    | E2    | E3    | E4    | E5    | E6    | E7    | E8    | E9    | E10   | E11   | E12   | E13   | Priorities |
|-----|-------|-------|-------|-------|-------|-------|-------|-------|-------|-------|-------|-------|-------|------------|
| E1  | 0.035 | 0.026 | 0.026 | 0.022 | 0.022 | 0.022 | 0.023 | 0.024 | 0.032 | 0.095 | 0.023 | 0.022 | 0.049 | 0.033      |
| E2  | 0.095 | 0.026 | 0.026 | 0.022 | 0.022 | 0.022 | 0.147 | 0.024 | 0.032 | 0.095 | 0.023 | 0.022 | 0.020 | 0.054      |
| E3  | 0.384 | 0.066 | 0.026 | 0.056 | 0.022 | 0.022 | 0.023 | 0.024 | 0.032 | 0.170 | 0.106 | 0.095 | 0.094 | 0.068      |
| E4  | 0.173 | 0.026 | 0.066 | 0.022 | 0.022 | 0.022 | 0.248 | 0.024 | 0.032 | 0.022 | 0.023 | 0.022 | 0.020 | 0.068      |
| E5  | 0.035 | 0.026 | 0.026 | 0.022 | 0.022 | 0.053 | 0.147 | 0.024 | 0.032 | 0.022 | 0.023 | 0.022 | 0.020 | 0.048      |
| E6  | 0.035 | 0.066 | 0.066 | 0.056 | 0.053 | 0.022 | 0.248 | 0.061 | 0.166 | 0.022 | 0.023 | 0.291 | 0.020 | 0.106      |
| E7  | 0.035 | 0.327 | 0.327 | 0.321 | 0.101 | 0.101 | 0.023 | 0.324 | 0.377 | 0.022 | 0.023 | 0.095 | 0.020 | 0.162      |
| E8  | 0.035 | 0.126 | 0.126 | 0.119 | 0.053 | 0.053 | 0.023 | 0.024 | 0.086 | 0.170 | 0.023 | 0.170 | 0.255 | 0.090      |
| E9  | 0.035 | 0.026 | 0.026 | 0.022 | 0.022 | 0.294 | 0.023 | 0.061 | 0.032 | 0.291 | 0.274 | 0.022 | 0.255 | 0.107      |
| E10 | 0.035 | 0.210 | 0.210 | 0.203 | 0.294 | 0.022 | 0.023 | 0.061 | 0.086 | 0.022 | 0.274 | 0.170 | 0.020 | 0.104      |
| E11 | 0.035 | 0.026 | 0.026 | 0.022 | 0.174 | 0.174 | 0.023 | 0.024 | 0.032 | 0.022 | 0.023 | 0.022 | 0.049 | 0.049      |
| E12 | 0.035 | 0.026 | 0.026 | 0.056 | 0.174 | 0.174 | 0.023 | 0.122 | 0.032 | 0.022 | 0.106 | 0.022 | 0.156 | 0.069      |
| E13 | 0.035 | 0.026 | 0.026 | 0.056 | 0.022 | 0.022 | 0.023 | 0.206 | 0.032 | 0.022 | 0.057 | 0.022 | 0.020 | 0.045      |

Table S113. Case 30. Original Weighted Supermatrix and Priorities.

|     | E1    | E2    | E3    | E4    | E5    | E6    | E7    | E8    | E9    | E10   | E11   | E12   | E13   | E14   | E15   | E16   | E17   | E18   | Priorities |
|-----|-------|-------|-------|-------|-------|-------|-------|-------|-------|-------|-------|-------|-------|-------|-------|-------|-------|-------|------------|
| E1  | 0.000 | 0.000 | 0.177 | 0.177 | 0.176 | 0.175 | 0.132 | 0.132 | 0.134 | 0.133 | 0.133 | 0.132 | 0.132 | 0.131 | 0.000 | 0.000 | 0.000 | 0.000 | 0.106      |
| E2  | 0.000 | 0.000 | 0.159 | 0.159 | 0.160 | 0.161 | 0.122 | 0.122 | 0.120 | 0.121 | 0.121 | 0.122 | 0.122 | 0.123 | 0.000 | 0.000 | 0.000 | 0.000 | 0.097      |
| E3  | 0.130 | 0.129 | 0.075 | 0.088 | 0.088 | 0.087 | 0.067 | 0.069 | 0.068 | 0.069 | 0.068 | 0.068 | 0.068 | 0.067 | 0.000 | 0.000 | 0.000 | 0.000 | 0.079      |
| E4  | 0.128 | 0.127 | 0.087 | 0.073 | 0.086 | 0.086 | 0.065 | 0.066 | 0.067 | 0.067 | 0.066 | 0.067 | 0.066 | 0.066 | 0.000 | 0.000 | 0.000 | 0.000 | 0.077      |
| E5  | 0.121 | 0.121 | 0.081 | 0.081 | 0.069 | 0.081 | 0.063 | 0.062 | 0.063 | 0.063 | 0.063 | 0.063 | 0.062 | 0.062 | 0.000 | 0.000 | 0.000 | 0.000 | 0.073      |
| E6  | 0.120 | 0.121 | 0.078 | 0.078 | 0.078 | 0.068 | 0.063 | 0.061 | 0.060 | 0.060 | 0.061 | 0.062 | 0.062 | 0.064 | 0.000 | 0.000 | 0.000 | 0.000 | 0.072      |
| E7  | 0.064 | 0.065 | 0.043 | 0.042 | 0.043 | 0.044 | 0.028 | 0.032 | 0.031 | 0.031 | 0.032 | 0.031 | 0.032 | 0.033 | 0.124 | 0.125 | 0.124 | 0.127 | 0.051      |
| E8  | 0.070 | 0.070 | 0.049 | 0.048 | 0.048 | 0.048 | 0.035 | 0.031 | 0.033 | 0.034 | 0.034 | 0.034 | 0.034 | 0.035 | 0.137 | 0.139 | 0.137 | 0.139 | 0.055      |
| E9  | 0.054 | 0.053 | 0.038 | 0.038 | 0.038 | 0.037 | 0.027 | 0.026 | 0.024 | 0.028 | 0.028 | 0.028 | 0.026 | 0.026 | 0.106 | 0.108 | 0.107 | 0.106 | 0.043      |
| E10 | 0.073 | 0.072 | 0.052 | 0.051 | 0.051 | 0.049 | 0.036 | 0.036 | 0.037 | 0.032 | 0.037 | 0.037 | 0.036 | 0.036 | 0.146 | 0.147 | 0.145 | 0.145 | 0.058      |
| E11 | 0.071 | 0.070 | 0.048 | 0.048 | 0.048 | 0.048 | 0.035 | 0.035 | 0.036 | 0.035 | 0.031 | 0.036 | 0.034 | 0.034 | 0.140 | 0.138 | 0.142 | 0.139 | 0.056      |
| E12 | 0.074 | 0.074 | 0.051 | 0.051 | 0.051 | 0.051 | 0.037 | 0.037 | 0.038 | 0.038 | 0.038 | 0.033 | 0.037 | 0.036 | 0.149 | 0.148 | 0.149 | 0.147 | 0.059      |
| E13 | 0.042 | 0.042 | 0.028 | 0.028 | 0.028 | 0.029 | 0.022 | 0.021 | 0.021 | 0.021 | 0.021 | 0.021 | 0.019 | 0.024 | 0.087 | 0.086 | 0.086 | 0.086 | 0.034      |
| E14 | 0.053 | 0.054 | 0.035 | 0.035 | 0.035 | 0.037 | 0.028 | 0.028 | 0.026 | 0.027 | 0.026 | 0.026 | 0.031 | 0.023 | 0.110 | 0.108 | 0.110 | 0.110 | 0.043      |
| E15 | 0.000 | 0.000 | 0.000 | 0.000 | 0.000 | 0.000 | 0.067 | 0.067 | 0.067 | 0.068 | 0.068 | 0.068 | 0.068 | 0.068 | 0.000 | 0.000 | 0.000 | 0.000 | 0.027      |
| E16 | 0.000 | 0.000 | 0.000 | 0.000 | 0.000 | 0.000 | 0.055 | 0.055 | 0.055 | 0.056 | 0.054 | 0.055 | 0.055 | 0.054 | 0.000 | 0.000 | 0.000 | 0.000 | 0.022      |
| E17 | 0.000 | 0.000 | 0.000 | 0.000 | 0.000 | 0.000 | 0.062 | 0.062 | 0.063 | 0.062 | 0.063 | 0.063 | 0.061 | 0.062 | 0.000 | 0.000 | 0.000 | 0.000 | 0.025      |
| E18 | 0.000 | 0.000 | 0.000 | 0.000 | 0.000 | 0.000 | 0.058 | 0.057 | 0.056 | 0.056 | 0.056 | 0.056 | 0.057 | 0.056 | 0.000 | 0.000 | 0.000 | 0.000 | 0.023      |

Table S114. Case 30's X Influence Matrix.

|     | E1 | E2 | E3 | E4 | E5 | E6 | E7 | E8 | E9 | E10 | E11 | E12 | E13 | E14 | E15 | E16 | E17 | E18 |
|-----|----|----|----|----|----|----|----|----|----|-----|-----|-----|-----|-----|-----|-----|-----|-----|
| E1  | 0  | 0  | 4  | 4  | 4  | 4  | 4  | 4  | 4  | 4   | 4   | 4   | 4   | 4   | 0   | 0   | 0   | 0   |
| E2  | 0  | 0  | 4  | 4  | 4  | 4  | 4  | 4  | 4  | 4   | 4   | 4   | 4   | 4   | 0   | 0   | 0   | 0   |
| E3  | 4  | 4  | 2  | 2  | 2  | 2  | 2  | 2  | 2  | 2   | 2   | 2   | 2   | 2   | 0   | 0   | 0   | 0   |
| E4  | 4  | 4  | 2  | 2  | 2  | 2  | 2  | 2  | 2  | 2   | 2   | 2   | 2   | 2   | 0   | 0   | 0   | 0   |
| E5  | 4  | 4  | 2  | 2  | 1  | 2  | 2  | 2  | 2  | 2   | 2   | 2   | 2   | 2   | 0   | 0   | 0   | 0   |
| E6  | 4  | 4  | 2  | 2  | 2  | 1  | 2  | 2  | 2  | 2   | 2   | 2   | 2   | 2   | 0   | 0   | 0   | 0   |
| E7  | 2  | 2  | 1  | 1  | 1  | 1  | 1  | 1  | 1  | 1   | 1   | 1   | 1   | 1   | 4   | 4   | 4   | 4   |
| E8  | 2  | 2  | 1  | 1  | 1  | 1  | 1  | 1  | 1  | 1   | 1   | 1   | 1   | 1   | 4   | 4   | 4   | 4   |
| E9  | 2  | 2  | 1  | 1  | 1  | 1  | 1  | 0  | 0  | 1   | 1   | 1   | 0   | 0   | 3   | 3   | 3   | 3   |
| E10 | 2  | 2  | 1  | 1  | 1  | 1  | 1  | 1  | 1  | 1   | 1   | 1   | 1   | 1   | 4   | 4   | 4   | 4   |
| E11 | 2  | 2  | 1  | 1  | 1  | 1  | 1  | 1  | 1  | 1   | 1   | 1   | 1   | 1   | 4   | 4   | 4   | 4   |
| E12 | 2  | 2  | 1  | 1  | 1  | 1  | 1  | 1  | 1  | 1   | 1   | 1   | 1   | 1   | 4   | 4   | 4   | 4   |
| E13 | 1  | 1  | 0  | 0  | 0  | 0  | 0  | 0  | 0  | 0   | 0   | 0   | 0   | 0   | 2   | 2   | 2   | 2   |
| E14 | 2  | 2  | 0  | 0  | 0  | 1  | 1  | 1  | 0  | 1   | 0   | 0   | 1   | 0   | 3   | 3   | 3   | 3   |
| E15 | 0  | 0  | 0  | 0  | 0  | 0  | 2  | 2  | 2  | 2   | 2   | 2   | 2   | 2   | 0   | 0   | 0   | 0   |
| E16 | 0  | 0  | 0  | 0  | 0  | 0  | 2  | 2  | 2  | 2   | 2   | 2   | 2   | 2   | 0   | 0   | 0   | 0   |
| E17 | 0  | 0  | 0  | 0  | 0  | 0  | 2  | 2  | 2  | 2   | 2   | 2   | 2   | 2   | 0   | 0   | 0   | 0   |
| E18 | 0  | 0  | 0  | 0  | 0  | 0  | 2  | 2  | 2  | 2   | 2   | 2   | 2   | 2   | 0   | 0   | 0   | 0   |

Table S115. Case 30. Weighted Supermatrix and Priorities, according to procedure 1.

|     | E1    | E2    | E3    | E4    | E5    | E6    | E7    | E8    | E9    | E10   | E11   | E12   | E13   | E14   | E15   | E16   | E17   | E18   | Priorities |
|-----|-------|-------|-------|-------|-------|-------|-------|-------|-------|-------|-------|-------|-------|-------|-------|-------|-------|-------|------------|
| E1  | 0.000 | 0.000 | 0.264 | 0.264 | 0.269 | 0.259 | 0.209 | 0.217 | 0.224 | 0.209 | 0.217 | 0.217 | 0.217 | 0.224 | 0.000 | 0.000 | 0.000 | 0.000 | 0.156      |
| E2  | 0.000 | 0.000 | 0.264 | 0.264 | 0.269 | 0.259 | 0.209 | 0.217 | 0.224 | 0.209 | 0.217 | 0.217 | 0.217 | 0.224 | 0.000 | 0.000 | 0.000 | 0.000 | 0.156      |
| E3  | 0.179 | 0.179 | 0.075 | 0.075 | 0.082 | 0.081 | 0.055 | 0.055 | 0.056 | 0.055 | 0.055 | 0.055 | 0.055 | 0.056 | 0.000 | 0.000 | 0.000 | 0.000 | 0.100      |
| E4  | 0.179 | 0.179 | 0.075 | 0.075 | 0.082 | 0.081 | 0.055 | 0.055 | 0.056 | 0.055 | 0.055 | 0.055 | 0.055 | 0.056 | 0.000 | 0.000 | 0.000 | 0.000 | 0.100      |
| E5  | 0.179 | 0.179 | 0.075 | 0.075 | 0.031 | 0.081 | 0.055 | 0.055 | 0.056 | 0.055 | 0.055 | 0.055 | 0.055 | 0.056 | 0.000 | 0.000 | 0.000 | 0.000 | 0.095      |
| E6  | 0.179 | 0.179 | 0.075 | 0.075 | 0.082 | 0.030 | 0.055 | 0.055 | 0.056 | 0.055 | 0.055 | 0.055 | 0.055 | 0.056 | 0.000 | 0.000 | 0.000 | 0.000 | 0.095      |
| E7  | 0.038 | 0.038 | 0.028 | 0.028 | 0.031 | 0.030 | 0.020 | 0.021 | 0.021 | 0.020 | 0.021 | 0.021 | 0.021 | 0.021 | 0.169 | 0.169 | 0.169 | 0.169 | 0.037      |
| E8  | 0.038 | 0.038 | 0.028 | 0.028 | 0.031 | 0.030 | 0.020 | 0.021 | 0.021 | 0.020 | 0.021 | 0.021 | 0.021 | 0.021 | 0.169 | 0.169 | 0.169 | 0.169 | 0.037      |
| E9  | 0.038 | 0.038 | 0.028 | 0.028 | 0.031 | 0.030 | 0.020 | 0.000 | 0.000 | 0.020 | 0.021 | 0.021 | 0.000 | 0.000 | 0.061 | 0.061 | 0.061 | 0.061 | 0.030      |
| E10 | 0.038 | 0.038 | 0.028 | 0.028 | 0.031 | 0.030 | 0.020 | 0.021 | 0.021 | 0.020 | 0.021 | 0.021 | 0.021 | 0.021 | 0.169 | 0.169 | 0.169 | 0.169 | 0.037      |
| E11 | 0.038 | 0.038 | 0.028 | 0.028 | 0.031 | 0.030 | 0.020 | 0.021 | 0.021 | 0.020 | 0.021 | 0.021 | 0.021 | 0.021 | 0.169 | 0.169 | 0.169 | 0.169 | 0.037      |
| E12 | 0.038 | 0.038 | 0.028 | 0.028 | 0.031 | 0.030 | 0.020 | 0.021 | 0.021 | 0.020 | 0.021 | 0.021 | 0.021 | 0.021 | 0.169 | 0.169 | 0.169 | 0.169 | 0.037      |
| E13 | 0.017 | 0.017 | 0.000 | 0.000 | 0.000 | 0.000 | 0.000 | 0.000 | 0.000 | 0.000 | 0.000 | 0.000 | 0.000 | 0.000 | 0.030 | 0.030 | 0.030 | 0.030 | 0.007      |
| E14 | 0.038 | 0.038 | 0.000 | 0.000 | 0.000 | 0.030 | 0.020 | 0.021 | 0.000 | 0.020 | 0.000 | 0.000 | 0.021 | 0.000 | 0.061 | 0.061 | 0.061 | 0.061 | 0.020      |
| E15 | 0.000 | 0.000 | 0.000 | 0.000 | 0.000 | 0.000 | 0.055 | 0.055 | 0.056 | 0.055 | 0.055 | 0.055 | 0.055 | 0.056 | 0.000 | 0.000 | 0.000 | 0.000 | 0.014      |
| E16 | 0.000 | 0.000 | 0.000 | 0.000 | 0.000 | 0.000 | 0.055 | 0.055 | 0.056 | 0.055 | 0.055 | 0.055 | 0.055 | 0.056 | 0.000 | 0.000 | 0.000 | 0.000 | 0.014      |
| E17 | 0.000 | 0.000 | 0.000 | 0.000 | 0.000 | 0.000 | 0.055 | 0.055 | 0.056 | 0.055 | 0.055 | 0.055 | 0.055 | 0.056 | 0.000 | 0.000 | 0.000 | 0.000 | 0.014      |
| E18 | 0.000 | 0.000 | 0.000 | 0.000 | 0.000 | 0.000 | 0.055 | 0.055 | 0.056 | 0.055 | 0.055 | 0.055 | 0.055 | 0.056 | 0.000 | 0.000 | 0.000 | 0.000 | 0.014      |

Table S116. Case 30. Weighted Supermatrix and Priorities, according to procedure 2.

|     | E1    | E2    | E3    | E4    | E5    | E6    | E7    | E8    | E9    | E10   | E11   | E12   | E13   | E14   | E15   | E16   | E17   | E18   | Priorities |
|-----|-------|-------|-------|-------|-------|-------|-------|-------|-------|-------|-------|-------|-------|-------|-------|-------|-------|-------|------------|
| E1  | 0.011 | 0.011 | 0.215 | 0.215 | 0.219 | 0.219 | 0.202 | 0.202 | 0.202 | 0.202 | 0.202 | 0.202 | 0.202 | 0.202 | 0.013 | 0.013 | 0.013 | 0.013 | 0.136      |
| E2  | 0.011 | 0.011 | 0.215 | 0.215 | 0.219 | 0.219 | 0.202 | 0.202 | 0.202 | 0.202 | 0.202 | 0.202 | 0.202 | 0.202 | 0.013 | 0.013 | 0.013 | 0.013 | 0.136      |
| E3  | 0.153 | 0.153 | 0.074 | 0.074 | 0.079 | 0.078 | 0.055 | 0.055 | 0.056 | 0.055 | 0.055 | 0.055 | 0.055 | 0.056 | 0.013 | 0.013 | 0.013 | 0.013 | 0.084      |
| E4  | 0.153 | 0.153 | 0.074 | 0.074 | 0.079 | 0.078 | 0.055 | 0.055 | 0.056 | 0.055 | 0.055 | 0.055 | 0.055 | 0.056 | 0.013 | 0.013 | 0.013 | 0.013 | 0.084      |
| E5  | 0.153 | 0.153 | 0.074 | 0.074 | 0.034 | 0.078 | 0.055 | 0.055 | 0.056 | 0.055 | 0.055 | 0.055 | 0.055 | 0.056 | 0.013 | 0.013 | 0.013 | 0.013 | 0.081      |
| E6  | 0.153 | 0.153 | 0.074 | 0.074 | 0.079 | 0.033 | 0.055 | 0.055 | 0.056 | 0.055 | 0.055 | 0.055 | 0.055 | 0.056 | 0.013 | 0.013 | 0.013 | 0.013 | 0.081      |
| E7  | 0.043 | 0.043 | 0.032 | 0.032 | 0.034 | 0.033 | 0.021 | 0.022 | 0.023 | 0.021 | 0.022 | 0.022 | 0.022 | 0.023 | 0.135 | 0.135 | 0.135 | 0.135 | 0.043      |
| E8  | 0.043 | 0.043 | 0.032 | 0.032 | 0.034 | 0.033 | 0.021 | 0.022 | 0.023 | 0.021 | 0.022 | 0.022 | 0.022 | 0.023 | 0.135 | 0.135 | 0.135 | 0.135 | 0.043      |
| E9  | 0.043 | 0.043 | 0.032 | 0.032 | 0.034 | 0.033 | 0.021 | 0.011 | 0.011 | 0.021 | 0.022 | 0.022 | 0.011 | 0.011 | 0.076 | 0.076 | 0.076 | 0.076 | 0.035      |
| E10 | 0.043 | 0.043 | 0.032 | 0.032 | 0.034 | 0.033 | 0.021 | 0.022 | 0.023 | 0.021 | 0.022 | 0.022 | 0.022 | 0.023 | 0.135 | 0.135 | 0.135 | 0.135 | 0.043      |
| E11 | 0.043 | 0.043 | 0.032 | 0.032 | 0.034 | 0.033 | 0.021 | 0.022 | 0.023 | 0.021 | 0.022 | 0.022 | 0.022 | 0.023 | 0.135 | 0.135 | 0.135 | 0.135 | 0.043      |
| E12 | 0.043 | 0.043 | 0.032 | 0.032 | 0.034 | 0.033 | 0.021 | 0.022 | 0.023 | 0.021 | 0.022 | 0.022 | 0.022 | 0.023 | 0.135 | 0.135 | 0.135 | 0.135 | 0.043      |
| E13 | 0.022 | 0.022 | 0.014 | 0.014 | 0.014 | 0.014 | 0.010 | 0.011 | 0.011 | 0.010 | 0.011 | 0.011 | 0.011 | 0.011 | 0.047 | 0.047 | 0.047 | 0.047 | 0.018      |
| E14 | 0.043 | 0.043 | 0.014 | 0.014 | 0.014 | 0.033 | 0.021 | 0.022 | 0.011 | 0.021 | 0.011 | 0.011 | 0.022 | 0.011 | 0.076 | 0.076 | 0.076 | 0.076 | 0.030      |
| E15 | 0.011 | 0.011 | 0.014 | 0.014 | 0.014 | 0.014 | 0.055 | 0.055 | 0.056 | 0.055 | 0.055 | 0.055 | 0.055 | 0.056 | 0.013 | 0.013 | 0.013 | 0.013 | 0.025      |
| E16 | 0.011 | 0.011 | 0.014 | 0.014 | 0.014 | 0.014 | 0.055 | 0.055 | 0.056 | 0.055 | 0.055 | 0.055 | 0.055 | 0.056 | 0.013 | 0.013 | 0.013 | 0.013 | 0.025      |
| E17 | 0.011 | 0.011 | 0.014 | 0.014 | 0.014 | 0.014 | 0.055 | 0.055 | 0.056 | 0.055 | 0.055 | 0.055 | 0.055 | 0.056 | 0.013 | 0.013 | 0.013 | 0.013 | 0.025      |
| E18 | 0.011 | 0.011 | 0.014 | 0.014 | 0.014 | 0.014 | 0.055 | 0.055 | 0.056 | 0.055 | 0.055 | 0.055 | 0.055 | 0.056 | 0.013 | 0.013 | 0.013 | 0.013 | 0.025      |

Table S117. Case 31. Original Weighted Supermatrix and Priorities.

|     | E1    | E2    | E3    | E4    | E5    | E6    | E7    | E8    | E9    | E10   | E11   | E12   | E13   | E14   | E15   | E16   | E17   | E18   | E19   | E20   | E21   | Priorities |
|-----|-------|-------|-------|-------|-------|-------|-------|-------|-------|-------|-------|-------|-------|-------|-------|-------|-------|-------|-------|-------|-------|------------|
| E1  | 0.000 | 0.000 | 0.000 | 0.000 | 0.000 | 0.000 | 0.000 | 0.031 | 0.053 | 0.066 | 0.070 | 0.162 | 0.061 | 0.038 | 0.062 | 0.057 | 0.019 | 0.119 | 0.056 | 0.026 | 0.026 | 0.063      |
| E2  | 0.000 | 0.000 | 0.000 | 0.000 | 0.000 | 0.000 | 0.000 | 0.028 | 0.010 | 0.065 | 0.047 | 0.015 | 0.051 | 0.063 | 0.103 | 0.080 | 0.027 | 0.040 | 0.019 | 0.019 | 0.011 | 0.024      |
| E3  | 0.000 | 0.000 | 0.000 | 0.000 | 0.000 | 0.000 | 0.000 | 0.019 | 0.010 | 0.070 | 0.114 | 0.013 | 0.051 | 0.089 | 0.145 | 0.057 | 0.045 | 0.040 | 0.019 | 0.019 | 0.009 | 0.028      |
| E4  | 0.000 | 0.000 | 0.000 | 0.000 | 0.000 | 0.000 | 0.000 | 0.020 | 0.023 | 0.065 | 0.043 | 0.034 | 0.068 | 0.063 | 0.103 | 0.034 | 0.027 | 0.071 | 0.006 | 0.011 | 0.011 | 0.028      |
| E5  | 0.000 | 0.000 | 0.000 | 0.000 | 0.000 | 0.000 | 0.000 | 0.034 | 0.023 | 0.052 | 0.082 | 0.162 | 0.073 | 0.038 | 0.062 | 0.057 | 0.015 | 0.119 | 0.056 | 0.026 | 0.026 | 0.061      |
| E6  | 0.000 | 0.000 | 0.000 | 0.000 | 0.000 | 0.000 | 0.000 | 0.019 | 0.024 | 0.065 | 0.039 | 0.034 | 0.067 | 0.063 | 0.103 | 0.080 | 0.027 | 0.071 | 0.019 | 0.019 | 0.011 | 0.030      |
| E7  | 0.000 | 0.000 | 0.000 | 0.000 | 0.000 | 0.000 | 0.000 | 0.016 | 0.023 | 0.062 | 0.049 | 0.025 | 0.073 | 0.089 | 0.145 | 0.080 | 0.045 | 0.040 | 0.031 | 0.019 | 0.016 | 0.030      |
| E8  | 0.154 | 0.215 | 0.123 | 0.154 | 0.215 | 0.123 | 0.123 | 0.000 | 0.000 | 0.042 | 0.056 | 0.042 | 0.113 | 0.169 | 0.276 | 0.127 | 0.147 | 0.000 | 0.589 | 0.000 | 0.315 | 0.094      |
| E9  | 0.154 | 0.092 | 0.185 | 0.154 | 0.092 | 0.185 | 0.185 | 0.000 | 0.000 | 0.127 | 0.113 | 0.127 | 0.056 | 0.000 | 0.000 | 0.042 | 0.442 | 0.000 | 0.000 | 0.000 | 0.000 | 0.091      |
| E10 | 0.059 | 0.082 | 0.102 | 0.067 | 0.062 | 0.067 | 0.061 | 0.000 | 0.000 | 0.000 | 0.000 | 0.179 | 0.291 | 0.000 | 0.000 | 0.000 | 0.000 | 0.000 | 0.000 | 0.000 | 0.000 | 0.072      |
| E11 | 0.063 | 0.062 | 0.052 | 0.056 | 0.073 | 0.066 | 0.035 | 0.000 | 0.000 | 0.000 | 0.000 | 0.102 | 0.097 | 0.000 | 0.000 | 0.000 | 0.000 | 0.000 | 0.000 | 0.000 | 0.000 | 0.044      |
| E12 | 0.186 | 0.033 | 0.027 | 0.071 | 0.185 | 0.063 | 0.032 | 0.833 | 0.833 | 0.291 | 0.291 | 0.000 | 0.000 | 0.000 | 0.000 | 0.387 | 0.000 | 0.000 | 0.000 | 0.000 | 0.000 | 0.229      |
| E13 | 0.041 | 0.050 | 0.043 | 0.113 | 0.038 | 0.055 | 0.050 | 0.000 | 0.000 | 0.097 | 0.097 | 0.059 | 0.000 | 0.000 | 0.000 | 0.000 | 0.000 | 0.000 | 0.000 | 0.280 | 0.000 | 0.045      |
| E14 | 0.041 | 0.048 | 0.163 | 0.058 | 0.040 | 0.035 | 0.108 | 0.000 | 0.000 | 0.000 | 0.000 | 0.000 | 0.000 | 0.387 | 0.000 | 0.000 | 0.000 | 0.000 | 0.000 | 0.321 | 0.094 | 0.040      |
| E15 | 0.038 | 0.044 | 0.041 | 0.053 | 0.037 | 0.039 | 0.034 | 0.000 | 0.000 | 0.000 | 0.000 | 0.000 | 0.000 | 0.000 | 0.000 | 0.000 | 0.000 | 0.000 | 0.000 | 0.123 | 0.310 | 0.016      |
| E16 | 0.043 | 0.152 | 0.042 | 0.052 | 0.036 | 0.146 | 0.151 | 0.000 | 0.000 | 0.000 | 0.000 | 0.048 | 0.000 | 0.000 | 0.000 | 0.000 | 0.000 | 0.000 | 0.000 | 0.000 | 0.171 | 0.033      |
| E17 | 0.017 | 0.088 | 0.066 | 0.031 | 0.017 | 0.055 | 0.092 | 0.000 | 0.000 | 0.000 | 0.000 | 0.000 | 0.000 | 0.000 | 0.000 | 0.000 | 0.000 | 0.000 | 0.000 | 0.068 | 0.000 | 0.013      |
| E18 | 0.039 | 0.038 | 0.041 | 0.036 | 0.039 | 0.047 | 0.037 | 0.000 | 0.000 | 0.000 | 0.000 | 0.000 | 0.000 | 0.000 | 0.000 | 0.000 | 0.000 | 0.000 | 0.000 | 0.027 | 0.000 | 0.011      |
| E19 | 0.080 | 0.021 | 0.036 | 0.110 | 0.080 | 0.030 | 0.022 | 0.000 | 0.000 | 0.000 | 0.000 | 0.000 | 0.000 | 0.000 | 0.000 | 0.000 | 0.000 | 0.000 | 0.000 | 0.043 | 0.000 | 0.017      |
| E20 | 0.036 | 0.050 | 0.063 | 0.027 | 0.036 | 0.060 | 0.033 | 0.000 | 0.000 | 0.000 | 0.000 | 0.000 | 0.000 | 0.000 | 0.000 | 0.000 | 0.205 | 0.500 | 0.205 | 0.000 | 0.000 | 0.023      |
| E21 | 0.051 | 0.025 | 0.017 | 0.018 | 0.051 | 0.030 | 0.039 | 0.000 | 0.000 | 0.000 | 0.000 | 0.000 | 0.000 | 0.000 | 0.000 | 0.000 | 0.000 | 0.000 | 0.000 | 0.000 | 0.000 | 0.010      |

Table S118. Case 31's X Influence Matrix.

[illegible]

Table S119. Case 31. Weighted Supermatrix and Priorities, according to procedure 1.

|     | E1    | E2    | E3    | E4    | E5    | E6    | E7    | E8    | E9    | E10   | E11   | E12   | E13   | E14   | E15   | E16   | E17   | E18   | E19   | E20   | E21   | Priorities |
|-----|-------|-------|-------|-------|-------|-------|-------|-------|-------|-------|-------|-------|-------|-------|-------|-------|-------|-------|-------|-------|-------|------------|
| E1  | 0.000 | 0.000 | 0.000 | 0.000 | 0.000 | 0.000 | 0.000 | 0.000 | 0.000 | 0.057 | 0.083 | 0.244 | 0.071 | 0.000 | 0.052 | 0.000 | 0.000 | 0.111 | 0.000 | 0.000 | 0.000 | 0.091      |
| E2  | 0.000 | 0.000 | 0.000 | 0.000 | 0.000 | 0.000 | 0.000 | 0.000 | 0.000 | 0.057 | 0.000 | 0.000 | 0.000 | 0.000 | 0.052 | 0.091 | 0.000 | 0.000 | 0.000 | 0.000 | 0.000 | 0.008      |
| E3  | 0.000 | 0.000 | 0.000 | 0.000 | 0.000 | 0.000 | 0.000 | 0.000 | 0.000 | 0.057 | 0.083 | 0.000 | 0.000 | 0.076 | 0.142 | 0.000 | 0.000 | 0.000 | 0.000 | 0.000 | 0.000 | 0.012      |
| E4  | 0.000 | 0.000 | 0.000 | 0.000 | 0.000 | 0.000 | 0.000 | 0.000 | 0.000 | 0.057 | 0.000 | 0.000 | 0.071 | 0.000 | 0.052 | 0.000 | 0.000 | 0.000 | 0.000 | 0.000 | 0.000 | 0.008      |
| E5  | 0.000 | 0.000 | 0.000 | 0.000 | 0.000 | 0.000 | 0.000 | 0.000 | 0.000 | 0.000 | 0.083 | 0.244 | 0.071 | 0.000 | 0.052 | 0.000 | 0.000 | 0.111 | 0.000 | 0.000 | 0.000 | 0.085      |
| E6  | 0.000 | 0.000 | 0.000 | 0.000 | 0.000 | 0.000 | 0.000 | 0.000 | 0.000 | 0.057 | 0.000 | 0.000 | 0.071 | 0.000 | 0.052 | 0.091 | 0.000 | 0.000 | 0.000 | 0.000 | 0.000 | 0.010      |
| E7  | 0.000 | 0.000 | 0.000 | 0.000 | 0.000 | 0.000 | 0.000 | 0.000 | 0.000 | 0.057 | 0.000 | 0.000 | 0.071 | 0.076 | 0.142 | 0.091 | 0.000 | 0.000 | 0.000 | 0.000 | 0.000 | 0.013      |
| E8  | 0.227 | 0.357 | 0.154 | 0.237 | 0.355 | 0.183 | 0.153 | 0.000 | 0.000 | 0.000 | 0.000 | 0.029 | 0.071 | 0.191 | 0.456 | 0.091 | 0.081 | 0.000 | 0.875 | 0.000 | 0.423 | 0.097      |
| E9  | 0.227 | 0.102 | 0.269 | 0.237 | 0.111 | 0.324 | 0.287 | 0.000 | 0.000 | 0.159 | 0.083 | 0.119 | 0.000 | 0.000 | 0.000 | 0.000 | 0.731 | 0.000 | 0.000 | 0.000 | 0.000 | 0.103      |
| E10 | 0.030 | 0.039 | 0.083 | 0.062 | 0.045 | 0.039 | 0.031 | 0.000 | 0.000 | 0.000 | 0.000 | 0.244 | 0.500 | 0.000 | 0.000 | 0.000 | 0.000 | 0.000 | 0.000 | 0.000 | 0.000 | 0.102      |
| E11 | 0.030 | 0.039 | 0.032 | 0.025 | 0.045 | 0.039 | 0.000 | 0.000 | 0.000 | 0.000 | 0.000 | 0.062 | 0.071 | 0.000 | 0.000 | 0.000 | 0.000 | 0.000 | 0.000 | 0.000 | 0.000 | 0.030      |
| E12 | 0.227 | 0.000 | 0.000 | 0.062 | 0.355 | 0.039 | 0.000 | 1.000 | 1.000 | 0.444 | 0.583 | 0.000 | 0.000 | 0.000 | 0.000 | 0.636 | 0.000 | 0.000 | 0.000 | 0.000 | 0.000 | 0.327      |
| E13 | 0.030 | 0.039 | 0.032 | 0.125 | 0.000 | 0.039 | 0.031 | 0.000 | 0.000 | 0.057 | 0.083 | 0.029 | 0.000 | 0.000 | 0.000 | 0.000 | 0.000 | 0.000 | 0.000 | 0.438 | 0.000 | 0.026      |
| E14 | 0.030 | 0.039 | 0.269 | 0.025 | 0.000 | 0.000 | 0.074 | 0.000 | 0.000 | 0.000 | 0.000 | 0.000 | 0.000 | 0.657 | 0.000 | 0.000 | 0.000 | 0.000 | 0.000 | 0.438 | 0.051 | 0.030      |
| E15 | 0.030 | 0.039 | 0.032 | 0.025 | 0.000 | 0.039 | 0.000 | 0.000 | 0.000 | 0.000 | 0.000 | 0.000 | 0.000 | 0.000 | 0.000 | 0.000 | 0.000 | 0.000 | 0.000 | 0.063 | 0.423 | 0.007      |
| E16 | 0.030 | 0.207 | 0.032 | 0.025 | 0.000 | 0.183 | 0.287 | 0.000 | 0.000 | 0.000 | 0.000 | 0.029 | 0.000 | 0.000 | 0.000 | 0.000 | 0.000 | 0.000 | 0.000 | 0.000 | 0.104 | 0.021      |
| E17 | 0.000 | 0.102 | 0.032 | 0.025 | 0.000 | 0.039 | 0.074 | 0.000 | 0.000 | 0.000 | 0.000 | 0.000 | 0.000 | 0.000 | 0.000 | 0.000 | 0.000 | 0.000 | 0.000 | 0.063 | 0.000 | 0.003      |
| E18 | 0.030 | 0.000 | 0.032 | 0.025 | 0.000 | 0.039 | 0.031 | 0.000 | 0.000 | 0.000 | 0.000 | 0.000 | 0.000 | 0.000 | 0.000 | 0.000 | 0.000 | 0.000 | 0.000 | 0.000 | 0.000 | 0.004      |
| E19 | 0.077 | 0.000 | 0.000 | 0.125 | 0.045 | 0.000 | 0.000 | 0.000 | 0.000 | 0.000 | 0.000 | 0.000 | 0.000 | 0.000 | 0.000 | 0.000 | 0.000 | 0.000 | 0.000 | 0.000 | 0.000 | 0.012      |
| E20 | 0.000 | 0.039 | 0.032 | 0.000 | 0.000 | 0.039 | 0.000 | 0.000 | 0.000 | 0.000 | 0.000 | 0.000 | 0.000 | 0.000 | 0.000 | 0.000 | 0.188 | 0.778 | 0.125 | 0.000 | 0.000 | 0.006      |
| E21 | 0.030 | 0.000 | 0.000 | 0.000 | 0.045 | 0.000 | 0.031 | 0.000 | 0.000 | 0.000 | 0.000 | 0.000 | 0.000 | 0.000 | 0.000 | 0.000 | 0.000 | 0.000 | 0.000 | 0.000 | 0.000 | 0.007      |

Table S120. Case 31. Weighted Supermatrix and Priorities, according to procedure 2.

|     | E1    | E2    | E3    | E4    | E5    | E6    | E7    | E8    | E9    | E10   | E11   | E12   | E13   | E14   | E15   | E16   | E17   | E18   | E19   | E20   | E21   | Priorities |
|-----|-------|-------|-------|-------|-------|-------|-------|-------|-------|-------|-------|-------|-------|-------|-------|-------|-------|-------|-------|-------|-------|------------|
| E1  | 0.013 | 0.016 | 0.014 | 0.012 | 0.019 | 0.015 | 0.015 | 0.034 | 0.034 | 0.055 | 0.070 | 0.172 | 0.063 | 0.026 | 0.053 | 0.026 | 0.028 | 0.086 | 0.032 | 0.023 | 0.022 | 0.052      |
| E2  | 0.013 | 0.016 | 0.014 | 0.012 | 0.019 | 0.015 | 0.015 | 0.034 | 0.034 | 0.055 | 0.024 | 0.015 | 0.022 | 0.026 | 0.053 | 0.075 | 0.028 | 0.029 | 0.032 | 0.023 | 0.022 | 0.028      |
| E3  | 0.013 | 0.016 | 0.014 | 0.012 | 0.019 | 0.015 | 0.015 | 0.034 | 0.034 | 0.055 | 0.070 | 0.015 | 0.022 | 0.073 | 0.110 | 0.026 | 0.028 | 0.029 | 0.032 | 0.023 | 0.022 | 0.032      |
| E4  | 0.013 | 0.016 | 0.014 | 0.012 | 0.019 | 0.015 | 0.015 | 0.034 | 0.034 | 0.055 | 0.024 | 0.015 | 0.063 | 0.026 | 0.053 | 0.026 | 0.028 | 0.029 | 0.032 | 0.023 | 0.022 | 0.028      |
| E5  | 0.013 | 0.016 | 0.014 | 0.012 | 0.019 | 0.015 | 0.015 | 0.034 | 0.034 | 0.020 | 0.070 | 0.172 | 0.063 | 0.026 | 0.053 | 0.026 | 0.028 | 0.086 | 0.032 | 0.023 | 0.022 | 0.049      |
| E6  | 0.013 | 0.016 | 0.014 | 0.012 | 0.019 | 0.015 | 0.015 | 0.034 | 0.034 | 0.055 | 0.024 | 0.015 | 0.063 | 0.026 | 0.053 | 0.075 | 0.028 | 0.029 | 0.032 | 0.023 | 0.022 | 0.030      |
| E7  | 0.013 | 0.016 | 0.014 | 0.012 | 0.019 | 0.015 | 0.015 | 0.034 | 0.034 | 0.055 | 0.024 | 0.015 | 0.063 | 0.073 | 0.110 | 0.075 | 0.028 | 0.029 | 0.032 | 0.023 | 0.022 | 0.034      |
| E8  | 0.179 | 0.232 | 0.129 | 0.181 | 0.220 | 0.145 | 0.127 | 0.034 | 0.034 | 0.020 | 0.024 | 0.037 | 0.063 | 0.134 | 0.259 | 0.075 | 0.079 | 0.029 | 0.304 | 0.023 | 0.227 | 0.099      |
| E9  | 0.179 | 0.090 | 0.197 | 0.181 | 0.098 | 0.224 | 0.195 | 0.034 | 0.034 | 0.117 | 0.070 | 0.111 | 0.022 | 0.026 | 0.020 | 0.026 | 0.285 | 0.029 | 0.032 | 0.023 | 0.022 | 0.089      |
| E10 | 0.034 | 0.043 | 0.078 | 0.063 | 0.051 | 0.041 | 0.038 | 0.034 | 0.034 | 0.020 | 0.024 | 0.172 | 0.279 | 0.026 | 0.020 | 0.026 | 0.028 | 0.029 | 0.032 | 0.023 | 0.022 | 0.063      |
| E11 | 0.034 | 0.043 | 0.037 | 0.030 | 0.051 | 0.041 | 0.015 | 0.034 | 0.034 | 0.020 | 0.024 | 0.070 | 0.063 | 0.026 | 0.020 | 0.026 | 0.028 | 0.029 | 0.032 | 0.023 | 0.022 | 0.037      |
| E12 | 0.179 | 0.016 | 0.014 | 0.063 | 0.220 | 0.041 | 0.015 | 0.310 | 0.310 | 0.265 | 0.285 | 0.015 | 0.022 | 0.026 | 0.020 | 0.289 | 0.028 | 0.029 | 0.032 | 0.023 | 0.022 | 0.132      |
| E13 | 0.034 | 0.043 | 0.037 | 0.111 | 0.019 | 0.041 | 0.038 | 0.034 | 0.034 | 0.055 | 0.070 | 0.037 | 0.022 | 0.026 | 0.020 | 0.026 | 0.028 | 0.029 | 0.032 | 0.235 | 0.022 | 0.044      |
| E14 | 0.034 | 0.043 | 0.197 | 0.030 | 0.019 | 0.015 | 0.075 | 0.034 | 0.034 | 0.020 | 0.024 | 0.015 | 0.022 | 0.281 | 0.020 | 0.026 | 0.028 | 0.029 | 0.032 | 0.235 | 0.061 | 0.056      |
| E15 | 0.034 | 0.043 | 0.037 | 0.030 | 0.019 | 0.041 | 0.015 | 0.034 | 0.034 | 0.020 | 0.024 | 0.015 | 0.022 | 0.026 | 0.020 | 0.026 | 0.028 | 0.029 | 0.032 | 0.066 | 0.227 | 0.033      |
| E16 | 0.034 | 0.154 | 0.037 | 0.030 | 0.019 | 0.145 | 0.195 | 0.034 | 0.034 | 0.020 | 0.024 | 0.037 | 0.022 | 0.026 | 0.020 | 0.026 | 0.028 | 0.029 | 0.032 | 0.023 | 0.107 | 0.044      |
| E17 | 0.013 | 0.090 | 0.037 | 0.030 | 0.019 | 0.041 | 0.075 | 0.034 | 0.034 | 0.020 | 0.024 | 0.015 | 0.022 | 0.026 | 0.020 | 0.026 | 0.028 | 0.029 | 0.032 | 0.066 | 0.022 | 0.030      |
| E18 | 0.034 | 0.016 | 0.037 | 0.030 | 0.019 | 0.041 | 0.038 | 0.034 | 0.034 | 0.020 | 0.024 | 0.015 | 0.022 | 0.026 | 0.020 | 0.026 | 0.028 | 0.029 | 0.032 | 0.023 | 0.022 | 0.026      |
| E19 | 0.074 | 0.016 | 0.014 | 0.111 | 0.051 | 0.015 | 0.015 | 0.034 | 0.034 | 0.020 | 0.024 | 0.015 | 0.022 | 0.026 | 0.020 | 0.026 | 0.028 | 0.029 | 0.032 | 0.023 | 0.022 | 0.030      |
| E20 | 0.013 | 0.043 | 0.037 | 0.012 | 0.019 | 0.041 | 0.015 | 0.034 | 0.034 | 0.020 | 0.024 | 0.015 | 0.022 | 0.026 | 0.020 | 0.026 | 0.138 | 0.298 | 0.093 | 0.023 | 0.022 | 0.037      |
| E21 | 0.034 | 0.016 | 0.014 | 0.012 | 0.051 | 0.015 | 0.038 | 0.034 | 0.034 | 0.020 | 0.024 | 0.015 | 0.022 | 0.026 | 0.020 | 0.026 | 0.028 | 0.029 | 0.032 | 0.023 | 0.022 | 0.026      |

Table S121. Case 32. Original Weighted Supermatrix and Priorities.

[illegible]



Table S122. Case 32's X Influence Matrix.

[illegible]

Table S123. Case 32. Weighted Supermatrix and Priorities, according to procedure 1.

[illegible]

Table S124. Case 32. Weighted Supermatrix and Priorities, according to procedure 2.

|     | E1    | E2    | E3    | E4    | E5    | E6    | E7    | E8    | E9    | E10   | E11   | E12   | E13   | E14   | E15   | E16   | E17   | E18   | E19   | E20   | E21   | E22   | E23   | E24   | Priorities |
|-----|-------|-------|-------|-------|-------|-------|-------|-------|-------|-------|-------|-------|-------|-------|-------|-------|-------|-------|-------|-------|-------|-------|-------|-------|------------|
| E1  | 0.009 | 0.010 | 0.011 | 0.008 | 0.025 | 0.013 | 0.030 | 0.049 | 0.033 | 0.040 | 0.028 | 0.024 | 0.024 | 0.057 | 0.016 | 0.022 | 0.056 | 0.056 | 0.069 | 0.065 | 0.058 | 0.062 | 0.061 | 0.027 | 0.030      |
| E2  | 0.009 | 0.010 | 0.011 | 0.008 | 0.093 | 0.114 | 0.065 | 0.091 | 0.070 | 0.071 | 0.059 | 0.086 | 0.091 | 0.108 | 0.042 | 0.078 | 0.201 | 0.201 | 0.124 | 0.171 | 0.211 | 0.218 | 0.163 | 0.079 | 0.080      |
| E3  | 0.009 | 0.010 | 0.011 | 0.008 | 0.157 | 0.185 | 0.125 | 0.155 | 0.200 | 0.125 | 0.191 | 0.143 | 0.155 | 0.108 | 0.226 | 0.137 | 0.201 | 0.201 | 0.256 | 0.240 | 0.211 | 0.218 | 0.233 | 0.271 | 0.131      |
| E4  | 0.009 | 0.010 | 0.011 | 0.008 | 0.051 | 0.032 | 0.065 | 0.049 | 0.033 | 0.071 | 0.028 | 0.047 | 0.049 | 0.057 | 0.042 | 0.041 | 0.140 | 0.140 | 0.069 | 0.065 | 0.101 | 0.062 | 0.107 | 0.079 | 0.048      |
| E5  | 0.043 | 0.025 | 0.028 | 0.072 | 0.010 | 0.032 | 0.065 | 0.049 | 0.070 | 0.040 | 0.059 | 0.047 | 0.049 | 0.108 | 0.042 | 0.041 | 0.020 | 0.020 | 0.024 | 0.023 | 0.021 | 0.022 | 0.022 | 0.027 | 0.042      |
| E6  | 0.021 | 0.025 | 0.028 | 0.018 | 0.051 | 0.013 | 0.030 | 0.024 | 0.070 | 0.021 | 0.059 | 0.024 | 0.024 | 0.017 | 0.016 | 0.041 | 0.020 | 0.020 | 0.024 | 0.023 | 0.021 | 0.022 | 0.022 | 0.027 | 0.032      |
| E7  | 0.074 | 0.056 | 0.063 | 0.126 | 0.157 | 0.114 | 0.012 | 0.155 | 0.129 | 0.071 | 0.059 | 0.086 | 0.049 | 0.108 | 0.091 | 0.137 | 0.020 | 0.020 | 0.024 | 0.023 | 0.021 | 0.022 | 0.022 | 0.027 | 0.071      |
| E8  | 0.009 | 0.025 | 0.011 | 0.008 | 0.025 | 0.032 | 0.030 | 0.010 | 0.033 | 0.021 | 0.012 | 0.010 | 0.024 | 0.017 | 0.016 | 0.010 | 0.020 | 0.020 | 0.024 | 0.023 | 0.021 | 0.022 | 0.022 | 0.027 | 0.020      |
| E9  | 0.127 | 0.164 | 0.179 | 0.126 | 0.093 | 0.114 | 0.196 | 0.091 | 0.013 | 0.125 | 0.120 | 0.143 | 0.155 | 0.108 | 0.091 | 0.137 | 0.020 | 0.020 | 0.024 | 0.023 | 0.021 | 0.022 | 0.022 | 0.027 | 0.106      |
| E10 | 0.021 | 0.025 | 0.028 | 0.038 | 0.025 | 0.032 | 0.065 | 0.024 | 0.033 | 0.009 | 0.059 | 0.047 | 0.091 | 0.057 | 0.042 | 0.078 | 0.020 | 0.020 | 0.024 | 0.023 | 0.021 | 0.022 | 0.022 | 0.027 | 0.037      |
| E11 | 0.127 | 0.056 | 0.063 | 0.072 | 0.093 | 0.065 | 0.065 | 0.091 | 0.070 | 0.125 | 0.012 | 0.143 | 0.091 | 0.057 | 0.091 | 0.010 | 0.020 | 0.020 | 0.024 | 0.023 | 0.021 | 0.022 | 0.022 | 0.027 | 0.062      |
| E12 | 0.021 | 0.025 | 0.028 | 0.038 | 0.025 | 0.032 | 0.030 | 0.024 | 0.033 | 0.040 | 0.059 | 0.010 | 0.049 | 0.032 | 0.042 | 0.041 | 0.020 | 0.020 | 0.024 | 0.023 | 0.021 | 0.022 | 0.022 | 0.027 | 0.031      |
| E13 | 0.074 | 0.056 | 0.063 | 0.038 | 0.051 | 0.065 | 0.065 | 0.049 | 0.070 | 0.125 | 0.059 | 0.047 | 0.010 | 0.057 | 0.042 | 0.078 | 0.020 | 0.020 | 0.024 | 0.023 | 0.021 | 0.022 | 0.022 | 0.027 | 0.052      |
| E14 | 0.009 | 0.025 | 0.028 | 0.018 | 0.025 | 0.032 | 0.030 | 0.024 | 0.013 | 0.021 | 0.059 | 0.024 | 0.024 | 0.008 | 0.042 | 0.041 | 0.020 | 0.020 | 0.024 | 0.023 | 0.021 | 0.022 | 0.022 | 0.027 | 0.025      |
| E15 | 0.009 | 0.010 | 0.011 | 0.018 | 0.025 | 0.013 | 0.012 | 0.024 | 0.013 | 0.009 | 0.028 | 0.024 | 0.024 | 0.017 | 0.016 | 0.022 | 0.020 | 0.020 | 0.024 | 0.023 | 0.021 | 0.022 | 0.022 | 0.027 | 0.017      |
| E16 | 0.009 | 0.010 | 0.011 | 0.008 | 0.010 | 0.013 | 0.012 | 0.010 | 0.013 | 0.009 | 0.012 | 0.010 | 0.010 | 0.017 | 0.016 | 0.010 | 0.020 | 0.020 | 0.024 | 0.023 | 0.021 | 0.022 | 0.022 | 0.027 | 0.013      |
| E17 | 0.127 | 0.101 | 0.063 | 0.126 | 0.010 | 0.013 | 0.012 | 0.010 | 0.013 | 0.009 | 0.012 | 0.010 | 0.010 | 0.008 | 0.016 | 0.010 | 0.020 | 0.020 | 0.024 | 0.023 | 0.021 | 0.022 | 0.022 | 0.027 | 0.036      |
| E18 | 0.127 | 0.164 | 0.179 | 0.126 | 0.010 | 0.013 | 0.012 | 0.010 | 0.013 | 0.009 | 0.012 | 0.010 | 0.010 | 0.008 | 0.016 | 0.010 | 0.020 | 0.020 | 0.024 | 0.023 | 0.021 | 0.022 | 0.022 | 0.027 | 0.057      |
| E19 | 0.021 | 0.025 | 0.028 | 0.018 | 0.010 | 0.013 | 0.012 | 0.010 | 0.013 | 0.009 | 0.012 | 0.010 | 0.010 | 0.008 | 0.016 | 0.010 | 0.020 | 0.020 | 0.024 | 0.023 | 0.021 | 0.022 | 0.022 | 0.027 | 0.017      |
| E20 | 0.021 | 0.025 | 0.028 | 0.038 | 0.010 | 0.013 | 0.012 | 0.010 | 0.013 | 0.009 | 0.012 | 0.010 | 0.010 | 0.008 | 0.016 | 0.010 | 0.020 | 0.020 | 0.024 | 0.023 | 0.021 | 0.022 | 0.022 | 0.027 | 0.018      |
| E21 | 0.074 | 0.101 | 0.063 | 0.038 | 0.010 | 0.013 | 0.012 | 0.010 | 0.013 | 0.009 | 0.012 | 0.010 | 0.010 | 0.008 | 0.016 | 0.010 | 0.020 | 0.020 | 0.024 | 0.023 | 0.021 | 0.022 | 0.022 | 0.027 | 0.031      |
| E22 | 0.021 | 0.010 | 0.011 | 0.018 | 0.010 | 0.013 | 0.012 | 0.010 | 0.013 | 0.009 | 0.012 | 0.010 | 0.010 | 0.008 | 0.016 | 0.010 | 0.020 | 0.020 | 0.024 | 0.023 | 0.021 | 0.022 | 0.022 | 0.027 | 0.014      |
| E23 | 0.009 | 0.010 | 0.011 | 0.008 | 0.010 | 0.013 | 0.012 | 0.010 | 0.013 | 0.009 | 0.012 | 0.010 | 0.010 | 0.008 | 0.016 | 0.010 | 0.020 | 0.020 | 0.024 | 0.023 | 0.021 | 0.022 | 0.022 | 0.027 | 0.013      |
| E24 | 0.021 | 0.025 | 0.028 | 0.018 | 0.010 | 0.013 | 0.012 | 0.010 | 0.013 | 0.009 | 0.012 | 0.010 | 0.010 | 0.008 | 0.016 | 0.010 | 0.020 | 0.020 | 0.024 | 0.023 | 0.021 | 0.022 | 0.022 | 0.027 | 0.017      |

Table S125. Case 33. Original Weighted Supermatrix and Priorities.

|    | E1    | E2    | E3    | E4    | E5    | E6    | E7    | E8    | Priorities |
|----|-------|-------|-------|-------|-------|-------|-------|-------|------------|
| E1 | 0.000 | 0.000 | 0.000 | 0.000 | 0.067 | 0.121 | 0.216 | 0.583 | 0.145      |
| E2 | 0.000 | 0.000 | 0.000 | 0.000 | 0.183 | 0.055 | 0.049 | 0.063 | 0.034      |
| E3 | 0.000 | 0.000 | 0.000 | 0.000 | 0.064 | 0.257 | 0.095 | 0.129 | 0.074      |
| E4 | 0.000 | 0.000 | 0.000 | 0.000 | 0.686 | 0.567 | 0.640 | 0.226 | 0.247      |
| E5 | 0.044 | 0.630 | 0.052 | 0.050 | 0.000 | 0.000 | 0.000 | 0.000 | 0.047      |
| E6 | 0.114 | 0.039 | 0.428 | 0.325 | 0.000 | 0.000 | 0.000 | 0.000 | 0.138      |
| E7 | 0.255 | 0.165 | 0.260 | 0.312 | 0.000 | 0.000 | 0.000 | 0.000 | 0.158      |
| E8 | 0.588 | 0.166 | 0.261 | 0.313 | 0.000 | 0.000 | 0.000 | 0.000 | 0.157      |

Table S126. Case 33's X Influence Matrix.

|    | E1 | E2 | E3 | E4 | E5 | E6 | E7 | E8 |
|----|----|----|----|----|----|----|----|----|
| E1 | 0  | 0  | 0  | 0  | 0  | 1  | 1  | 4  |
| E2 | 0  | 0  | 0  | 0  | 1  | 0  | 0  | 0  |
| E3 | 0  | 0  | 0  | 0  | 0  | 2  | 0  | 1  |
| E4 | 0  | 0  | 0  | 0  | 4  | 4  | 4  | 1  |
| E5 | 0  | 4  | 0  | 0  | 0  | 0  | 0  | 0  |
| E6 | 0  | 0  | 4  | 4  | 0  | 0  | 0  | 0  |
| E7 | 2  | 1  | 3  | 4  | 0  | 0  | 0  | 0  |
| E8 | 4  | 1  | 3  | 4  | 0  | 0  | 0  | 0  |

Table S127. Case 33. Weighted Supermatrix and Priorities, according to procedure 1.

|    | E1    | E2    | E3    | E4    | E5    | E6    | E7    | E8    | Priorities |
|----|-------|-------|-------|-------|-------|-------|-------|-------|------------|
| E1 | 0.000 | 0.000 | 0.000 | 0.000 | 0.000 | 0.081 | 0.125 | 0.778 | 0.241      |
| E2 | 0.000 | 0.000 | 0.000 | 0.000 | 0.125 | 0.000 | 0.000 | 0.000 | 0.000      |
| E3 | 0.000 | 0.000 | 0.000 | 0.000 | 0.000 | 0.188 | 0.000 | 0.111 | 0.050      |
| E4 | 0.000 | 0.000 | 0.000 | 0.000 | 0.875 | 0.731 | 0.875 | 0.111 | 0.209      |
| E5 | 0.000 | 0.778 | 0.000 | 0.000 | 0.000 | 0.000 | 0.000 | 0.000 | 0.000      |
| E6 | 0.000 | 0.000 | 0.600 | 0.333 | 0.000 | 0.000 | 0.000 | 0.000 | 0.100      |
| E7 | 0.167 | 0.111 | 0.200 | 0.333 | 0.000 | 0.000 | 0.000 | 0.000 | 0.120      |
| E8 | 0.833 | 0.111 | 0.200 | 0.333 | 0.000 | 0.000 | 0.000 | 0.000 | 0.281      |

Table S128. Case 33. Weighted Supermatrix and Priorities, according to procedure 2.

|    | E1    | E2    | E3    | E4    | E5    | E6    | E7    | E8    | Priorities |
|----|-------|-------|-------|-------|-------|-------|-------|-------|------------|
| E1 | 0.047 | 0.045 | 0.034 | 0.031 | 0.052 | 0.104 | 0.144 | 0.528 | 0.151      |
| E2 | 0.047 | 0.045 | 0.034 | 0.031 | 0.144 | 0.041 | 0.052 | 0.045 | 0.049      |
| E3 | 0.047 | 0.045 | 0.034 | 0.031 | 0.052 | 0.199 | 0.052 | 0.123 | 0.076      |
| E4 | 0.047 | 0.045 | 0.034 | 0.031 | 0.542 | 0.494 | 0.542 | 0.123 | 0.213      |
| E5 | 0.047 | 0.528 | 0.034 | 0.031 | 0.052 | 0.041 | 0.052 | 0.045 | 0.066      |
| E6 | 0.047 | 0.045 | 0.397 | 0.281 | 0.052 | 0.041 | 0.052 | 0.045 | 0.123      |
| E7 | 0.212 | 0.123 | 0.216 | 0.281 | 0.052 | 0.041 | 0.052 | 0.045 | 0.138      |
| E8 | 0.506 | 0.123 | 0.216 | 0.281 | 0.052 | 0.041 | 0.052 | 0.045 | 0.183      |

Table S129. Case 34. Original Weighted Supermatrix and Priorities.

|     | E1    | E2    | E3    | E4    | E5    | E6    | E7    | E8    | E9    | E10   | E11   | E12   | E13   | E14   | E15   | E16   | E17   | Priorities |
|-----|-------|-------|-------|-------|-------|-------|-------|-------|-------|-------|-------|-------|-------|-------|-------|-------|-------|------------|
| E1  | 0.047 | 0.057 | 0.057 | 0.057 | 0.057 | 0.055 | 0.055 | 0.055 | 0.056 | 0.055 | 0.055 | 0.056 | 0.054 | 0.054 | 0.054 | 0.053 | 0.055 | 0.055      |
| E2  | 0.064 | 0.054 | 0.066 | 0.065 | 0.066 | 0.064 | 0.063 | 0.062 | 0.064 | 0.064 | 0.064 | 0.063 | 0.061 | 0.063 | 0.063 | 0.063 | 0.061 | 0.063      |
| E3  | 0.066 | 0.065 | 0.055 | 0.066 | 0.066 | 0.065 | 0.063 | 0.063 | 0.065 | 0.065 | 0.063 | 0.064 | 0.062 | 0.062 | 0.064 | 0.063 | 0.065 | 0.064      |
| E4  | 0.065 | 0.065 | 0.066 | 0.055 | 0.064 | 0.064 | 0.063 | 0.064 | 0.064 | 0.064 | 0.064 | 0.065 | 0.062 | 0.063 | 0.064 | 0.064 | 0.065 | 0.064      |
| E5  | 0.064 | 0.063 | 0.063 | 0.062 | 0.053 | 0.062 | 0.061 | 0.061 | 0.063 | 0.062 | 0.061 | 0.062 | 0.060 | 0.062 | 0.062 | 0.062 | 0.062 | 0.061      |
| E6  | 0.064 | 0.065 | 0.065 | 0.065 | 0.065 | 0.055 | 0.064 | 0.064 | 0.064 | 0.065 | 0.065 | 0.064 | 0.063 | 0.063 | 0.065 | 0.064 | 0.065 | 0.064      |
| E7  | 0.056 | 0.057 | 0.057 | 0.057 | 0.057 | 0.057 | 0.049 | 0.058 | 0.057 | 0.056 | 0.058 | 0.057 | 0.058 | 0.059 | 0.057 | 0.055 | 0.057 | 0.057      |
| E8  | 0.056 | 0.056 | 0.056 | 0.056 | 0.055 | 0.057 | 0.058 | 0.049 | 0.057 | 0.056 | 0.058 | 0.059 | 0.060 | 0.060 | 0.057 | 0.057 | 0.057 | 0.057      |
| E9  | 0.067 | 0.066 | 0.067 | 0.067 | 0.067 | 0.067 | 0.065 | 0.065 | 0.057 | 0.066 | 0.065 | 0.066 | 0.067 | 0.066 | 0.067 | 0.066 | 0.067 | 0.066      |
| E10 | 0.059 | 0.059 | 0.060 | 0.058 | 0.060 | 0.059 | 0.060 | 0.059 | 0.060 | 0.051 | 0.059 | 0.059 | 0.061 | 0.060 | 0.060 | 0.059 | 0.060 | 0.059      |
| E11 | 0.063 | 0.061 | 0.060 | 0.061 | 0.061 | 0.061 | 0.062 | 0.063 | 0.061 | 0.063 | 0.053 | 0.062 | 0.063 | 0.063 | 0.063 | 0.062 | 0.061 | 0.061      |
| E12 | 0.058 | 0.057 | 0.056 | 0.057 | 0.056 | 0.057 | 0.058 | 0.058 | 0.056 | 0.056 | 0.057 | 0.049 | 0.058 | 0.056 | 0.056 | 0.057 | 0.056 | 0.056      |
| E13 | 0.051 | 0.053 | 0.051 | 0.052 | 0.051 | 0.052 | 0.054 | 0.055 | 0.054 | 0.054 | 0.054 | 0.055 | 0.046 | 0.056 | 0.054 | 0.054 | 0.052 | 0.053      |
| E14 | 0.052 | 0.054 | 0.054 | 0.054 | 0.055 | 0.055 | 0.055 | 0.056 | 0.054 | 0.055 | 0.055 | 0.053 | 0.056 | 0.047 | 0.055 | 0.056 | 0.055 | 0.054      |
| E15 | 0.054 | 0.054 | 0.054 | 0.054 | 0.054 | 0.056 | 0.056 | 0.056 | 0.056 | 0.056 | 0.055 | 0.054 | 0.056 | 0.055 | 0.047 | 0.056 | 0.054 | 0.055      |
| E16 | 0.059 | 0.059 | 0.059 | 0.060 | 0.059 | 0.059 | 0.059 | 0.059 | 0.059 | 0.060 | 0.059 | 0.058 | 0.059 | 0.059 | 0.058 | 0.050 | 0.062 | 0.059      |
| E17 | 0.055 | 0.054 | 0.054 | 0.054 | 0.053 | 0.054 | 0.055 | 0.055 | 0.055 | 0.055 | 0.054 | 0.054 | 0.054 | 0.053 | 0.054 | 0.057 | 0.046 | 0.054      |

Table S130. Case 34's X Influence Matrix.

[illegible]



[illegible][illegible]

Table S135. Case 35. Weighted Supermatrix and Priorities, according to procedure 1.

|     | E1    | E2    | E3    | E4    | E5    | E6    | E7    | E8    | E9    | E10   | E11   | E12   | E13   | Priorities |
|-----|-------|-------|-------|-------|-------|-------|-------|-------|-------|-------|-------|-------|-------|------------|
| E1  | 0.076 | 0.059 | 0.070 | 0.027 | 0.049 | 0.136 | 0.191 | 0.000 | 0.034 | 0.037 | 0.140 | 0.000 | 0.060 | 0.066      |
| E2  | 0.076 | 0.059 | 0.070 | 0.063 | 0.000 | 0.000 | 0.076 | 0.565 | 0.152 | 0.174 | 0.140 | 0.000 | 0.060 | 0.139      |
| E3  | 0.076 | 0.059 | 0.070 | 0.244 | 0.211 | 0.136 | 0.076 | 0.055 | 0.152 | 0.174 | 0.140 | 0.063 | 0.060 | 0.116      |
| E4  | 0.288 | 0.294 | 0.027 | 0.244 | 0.479 | 0.286 | 0.000 | 0.000 | 0.000 | 0.174 | 0.140 | 0.532 | 0.491 | 0.173      |
| E5  | 0.000 | 0.059 | 0.272 | 0.063 | 0.000 | 0.066 | 0.000 | 0.000 | 0.019 | 0.071 | 0.029 | 0.000 | 0.269 | 0.061      |
| E6  | 0.030 | 0.000 | 0.027 | 0.027 | 0.000 | 0.030 | 0.000 | 0.118 | 0.152 | 0.021 | 0.140 | 0.000 | 0.060 | 0.038      |
| E7  | 0.030 | 0.000 | 0.000 | 0.000 | 0.000 | 0.000 | 0.657 | 0.262 | 0.152 | 0.000 | 0.016 | 0.063 | 0.000 | 0.139      |
| E8  | 0.288 | 0.294 | 0.272 | 0.244 | 0.049 | 0.000 | 0.000 | 0.000 | 0.034 | 0.000 | 0.140 | 0.278 | 0.000 | 0.146      |
| E9  | 0.030 | 0.000 | 0.027 | 0.027 | 0.211 | 0.286 | 0.000 | 0.000 | 0.000 | 0.174 | 0.029 | 0.000 | 0.000 | 0.039      |
| E10 | 0.000 | 0.059 | 0.027 | 0.063 | 0.000 | 0.030 | 0.000 | 0.000 | 0.152 | 0.000 | 0.029 | 0.063 | 0.000 | 0.031      |
| E11 | 0.000 | 0.000 | 0.000 | 0.000 | 0.000 | 0.030 | 0.000 | 0.000 | 0.152 | 0.174 | 0.061 | 0.000 | 0.000 | 0.013      |
| E12 | 0.076 | 0.059 | 0.070 | 0.000 | 0.000 | 0.000 | 0.000 | 0.000 | 0.000 | 0.000 | 0.000 | 0.000 | 0.000 | 0.021      |
| E13 | 0.030 | 0.059 | 0.070 | 0.000 | 0.000 | 0.000 | 0.000 | 0.000 | 0.000 | 0.000 | 0.000 | 0.000 | 0.000 | 0.018      |

Table S136. Case 35. Weighted Supermatrix and Priorities, according to procedure 2.

|     | E1    | E2    | E3    | E4    | E5    | E6    | E7    | E8    | E9    | E10   | E11   | E12   | E13   | Priorities |
|-----|-------|-------|-------|-------|-------|-------|-------|-------|-------|-------|-------|-------|-------|------------|
| E1  | 0.078 | 0.064 | 0.071 | 0.032 | 0.063 | 0.132 | 0.166 | 0.028 | 0.043 | 0.049 | 0.133 | 0.027 | 0.067 | 0.067      |
| E2  | 0.078 | 0.064 | 0.071 | 0.068 | 0.024 | 0.017 | 0.086 | 0.332 | 0.140 | 0.154 | 0.133 | 0.027 | 0.067 | 0.108      |
| E3  | 0.078 | 0.064 | 0.071 | 0.213 | 0.186 | 0.132 | 0.086 | 0.072 | 0.140 | 0.154 | 0.133 | 0.073 | 0.067 | 0.116      |
| E4  | 0.254 | 0.246 | 0.029 | 0.213 | 0.306 | 0.234 | 0.032 | 0.028 | 0.013 | 0.154 | 0.133 | 0.340 | 0.336 | 0.158      |
| E5  | 0.016 | 0.064 | 0.250 | 0.068 | 0.024 | 0.074 | 0.032 | 0.028 | 0.024 | 0.082 | 0.033 | 0.027 | 0.219 | 0.074      |
| E6  | 0.033 | 0.015 | 0.029 | 0.032 | 0.024 | 0.037 | 0.032 | 0.131 | 0.140 | 0.028 | 0.133 | 0.027 | 0.067 | 0.054      |
| E7  | 0.033 | 0.015 | 0.014 | 0.015 | 0.024 | 0.017 | 0.377 | 0.214 | 0.140 | 0.014 | 0.018 | 0.073 | 0.025 | 0.083      |
| E8  | 0.254 | 0.246 | 0.250 | 0.213 | 0.063 | 0.017 | 0.032 | 0.028 | 0.043 | 0.014 | 0.133 | 0.223 | 0.025 | 0.135      |
| E9  | 0.033 | 0.015 | 0.029 | 0.032 | 0.186 | 0.234 | 0.032 | 0.028 | 0.013 | 0.154 | 0.033 | 0.027 | 0.025 | 0.056      |
| E10 | 0.016 | 0.064 | 0.029 | 0.068 | 0.024 | 0.037 | 0.032 | 0.028 | 0.140 | 0.014 | 0.033 | 0.073 | 0.025 | 0.045      |
| E11 | 0.016 | 0.015 | 0.014 | 0.015 | 0.024 | 0.037 | 0.032 | 0.028 | 0.140 | 0.154 | 0.064 | 0.027 | 0.025 | 0.036      |
| E12 | 0.078 | 0.064 | 0.071 | 0.015 | 0.024 | 0.017 | 0.032 | 0.028 | 0.013 | 0.014 | 0.011 | 0.027 | 0.025 | 0.035      |
| E13 | 0.033 | 0.064 | 0.071 | 0.015 | 0.024 | 0.017 | 0.032 | 0.028 | 0.013 | 0.014 | 0.011 | 0.027 | 0.025 | 0.032      |



Table S137. Case 36. Original Weighted Supermatrix and Priorities.

|    | E1    | E2    | E3    | E4    | E5    | E6    | E7    | E8    | E9    | Priorities |
|----|-------|-------|-------|-------|-------|-------|-------|-------|-------|------------|
| E1 | 0.103 | 0.134 | 0.133 | 0.130 | 0.130 | 0.132 | 0.128 | 0.131 | 0.129 | 0.127      |
| E2 | 0.127 | 0.098 | 0.128 | 0.129 | 0.128 | 0.127 | 0.123 | 0.125 | 0.122 | 0.123      |
| E3 | 0.121 | 0.118 | 0.090 | 0.117 | 0.117 | 0.116 | 0.117 | 0.111 | 0.117 | 0.114      |
| E4 | 0.122 | 0.122 | 0.122 | 0.096 | 0.128 | 0.129 | 0.126 | 0.123 | 0.123 | 0.121      |
| E5 | 0.109 | 0.108 | 0.111 | 0.106 | 0.085 | 0.101 | 0.105 | 0.106 | 0.108 | 0.105      |
| E6 | 0.092 | 0.092 | 0.090 | 0.100 | 0.088 | 0.072 | 0.094 | 0.096 | 0.095 | 0.091      |
| E7 | 0.117 | 0.118 | 0.124 | 0.118 | 0.117 | 0.120 | 0.092 | 0.124 | 0.125 | 0.117      |
| E8 | 0.111 | 0.115 | 0.106 | 0.106 | 0.111 | 0.106 | 0.113 | 0.088 | 0.106 | 0.107      |
| E9 | 0.100 | 0.095 | 0.097 | 0.099 | 0.095 | 0.097 | 0.103 | 0.096 | 0.076 | 0.096      |

Table S138. Case 36's X Influence Matrix.

|    | E1 | E2 | E3 | E4 | E5 | E6 | E7 | E8 | E9 |
|----|----|----|----|----|----|----|----|----|----|
| E1 | 4  | 4  | 4  | 4  | 4  | 4  | 4  | 4  | 4  |
| E2 | 4  | 3  | 4  | 4  | 4  | 4  | 4  | 4  | 4  |
| E3 | 4  | 4  | 3  | 4  | 4  | 4  | 4  | 4  | 4  |
| E4 | 4  | 4  | 4  | 3  | 4  | 4  | 4  | 4  | 4  |
| E5 | 4  | 4  | 4  | 4  | 3  | 3  | 4  | 4  | 4  |
| E6 | 3  | 3  | 3  | 3  | 3  | 2  | 3  | 3  | 3  |
| E7 | 4  | 4  | 4  | 4  | 4  | 4  | 3  | 4  | 4  |
| E8 | 4  | 4  | 3  | 4  | 4  | 4  | 4  | 3  | 4  |
| E9 | 3  | 3  | 3  | 3  | 3  | 3  | 4  | 3  | 2  |

Table S139. Case 36. Weighted Supermatrix and Priorities, according to procedure 1.

|    | E1    | E2    | E3    | E4    | E5    | E6    | E7    | E8    | E9    | Priorities |
|----|-------|-------|-------|-------|-------|-------|-------|-------|-------|------------|
| E1 | 0.130 | 0.143 | 0.158 | 0.143 | 0.143 | 0.145 | 0.130 | 0.143 | 0.132 | 0.141      |
| E2 | 0.130 | 0.048 | 0.158 | 0.143 | 0.143 | 0.145 | 0.130 | 0.143 | 0.132 | 0.129      |
| E3 | 0.130 | 0.143 | 0.053 | 0.143 | 0.143 | 0.145 | 0.130 | 0.143 | 0.132 | 0.127      |
| E4 | 0.130 | 0.143 | 0.158 | 0.048 | 0.143 | 0.145 | 0.130 | 0.143 | 0.132 | 0.129      |
| E5 | 0.130 | 0.143 | 0.158 | 0.143 | 0.048 | 0.052 | 0.130 | 0.143 | 0.132 | 0.125      |
| E6 | 0.043 | 0.048 | 0.053 | 0.048 | 0.048 | 0.026 | 0.043 | 0.048 | 0.048 | 0.046      |
| E7 | 0.130 | 0.143 | 0.158 | 0.143 | 0.143 | 0.145 | 0.043 | 0.143 | 0.132 | 0.130      |
| E8 | 0.130 | 0.143 | 0.053 | 0.143 | 0.143 | 0.145 | 0.130 | 0.048 | 0.132 | 0.116      |
| E9 | 0.043 | 0.048 | 0.053 | 0.048 | 0.048 | 0.052 | 0.130 | 0.048 | 0.025 | 0.057      |

Table S140. Case 36. Weighted Supermatrix and Priorities, according to procedure 2.

|    | E1    | E2    | E3    | E4    | E5    | E6    | E7    | E8    | E9    | Priorities |
|----|-------|-------|-------|-------|-------|-------|-------|-------|-------|------------|
| E1 | 0.130 | 0.143 | 0.158 | 0.143 | 0.143 | 0.145 | 0.130 | 0.143 | 0.132 | 0.141      |
| E2 | 0.130 | 0.048 | 0.158 | 0.143 | 0.143 | 0.145 | 0.130 | 0.143 | 0.132 | 0.129      |
| E3 | 0.130 | 0.143 | 0.053 | 0.143 | 0.143 | 0.145 | 0.130 | 0.143 | 0.132 | 0.127      |
| E4 | 0.130 | 0.143 | 0.158 | 0.048 | 0.143 | 0.145 | 0.130 | 0.143 | 0.132 | 0.129      |
| E5 | 0.130 | 0.143 | 0.158 | 0.143 | 0.048 | 0.052 | 0.130 | 0.143 | 0.132 | 0.125      |
| E6 | 0.043 | 0.048 | 0.053 | 0.048 | 0.048 | 0.026 | 0.043 | 0.048 | 0.048 | 0.046      |
| E7 | 0.130 | 0.143 | 0.158 | 0.143 | 0.143 | 0.145 | 0.043 | 0.143 | 0.132 | 0.130      |
| E8 | 0.130 | 0.143 | 0.053 | 0.143 | 0.143 | 0.145 | 0.130 | 0.048 | 0.132 | 0.116      |
| E9 | 0.043 | 0.048 | 0.053 | 0.048 | 0.048 | 0.052 | 0.130 | 0.048 | 0.025 | 0.057      |

Table S141. Case 37. Original Weighted Supermatrix and Priorities.

|     | E1    | E2    | E3    | E4    | E5    | E6    | E7    | E8    | E9    | E10   | E11   | E12   | E13   | E14   | E15   | E16   | E17   | E18   | Priorities |
|-----|-------|-------|-------|-------|-------|-------|-------|-------|-------|-------|-------|-------|-------|-------|-------|-------|-------|-------|------------|
| E1  | 0.057 | 0.093 | 0.091 | 0.084 | 0.111 | 0.090 | 0.076 | 0.078 | 0.090 | 0.078 | 0.084 | 0.082 | 0.078 | 0.079 | 0.070 | 0.072 | 0.075 | 0.069 | 0.080      |
| E2  | 0.066 | 0.044 | 0.066 | 0.062 | 0.055 | 0.057 | 0.049 | 0.056 | 0.062 | 0.062 | 0.058 | 0.054 | 0.071 | 0.059 | 0.075 | 0.058 | 0.062 | 0.069 | 0.060      |
| E3  | 0.067 | 0.067 | 0.043 | 0.062 | 0.054 | 0.061 | 0.066 | 0.071 | 0.053 | 0.056 | 0.057 | 0.054 | 0.063 | 0.054 | 0.057 | 0.058 | 0.061 | 0.055 | 0.059      |
| E4  | 0.043 | 0.049 | 0.038 | 0.030 | 0.041 | 0.056 | 0.038 | 0.044 | 0.041 | 0.039 | 0.045 | 0.047 | 0.043 | 0.038 | 0.047 | 0.047 | 0.042 | 0.057 | 0.044      |
| E5  | 0.026 | 0.024 | 0.029 | 0.026 | 0.020 | 0.023 | 0.031 | 0.018 | 0.018 | 0.025 | 0.020 | 0.024 | 0.021 | 0.024 | 0.027 | 0.031 | 0.030 | 0.032 | 0.025      |
| E6  | 0.063 | 0.045 | 0.055 | 0.058 | 0.042 | 0.037 | 0.059 | 0.052 | 0.054 | 0.058 | 0.054 | 0.058 | 0.044 | 0.065 | 0.045 | 0.054 | 0.049 | 0.038 | 0.053      |
| E7  | 0.062 | 0.049 | 0.044 | 0.056 | 0.065 | 0.048 | 0.039 | 0.074 | 0.069 | 0.054 | 0.056 | 0.057 | 0.058 | 0.058 | 0.055 | 0.055 | 0.057 | 0.056 | 0.056      |
| E8  | 0.050 | 0.060 | 0.071 | 0.053 | 0.034 | 0.052 | 0.043 | 0.039 | 0.054 | 0.051 | 0.053 | 0.045 | 0.056 | 0.050 | 0.054 | 0.056 | 0.055 | 0.053 | 0.052      |
| E9  | 0.070 | 0.071 | 0.068 | 0.064 | 0.053 | 0.076 | 0.064 | 0.069 | 0.047 | 0.079 | 0.064 | 0.069 | 0.064 | 0.065 | 0.066 | 0.065 | 0.065 | 0.066 | 0.066      |
| E10 | 0.065 | 0.070 | 0.068 | 0.064 | 0.072 | 0.069 | 0.075 | 0.069 | 0.065 | 0.049 | 0.078 | 0.069 | 0.065 | 0.065 | 0.066 | 0.066 | 0.065 | 0.066 | 0.067      |
| E11 | 0.064 | 0.062 | 0.060 | 0.075 | 0.089 | 0.068 | 0.080 | 0.049 | 0.064 | 0.067 | 0.049 | 0.068 | 0.064 | 0.069 | 0.066 | 0.065 | 0.065 | 0.066 | 0.065      |
| E12 | 0.078 | 0.072 | 0.070 | 0.071 | 0.056 | 0.078 | 0.077 | 0.070 | 0.075 | 0.073 | 0.075 | 0.054 | 0.061 | 0.078 | 0.064 | 0.074 | 0.071 | 0.067 | 0.071      |
| E13 | 0.045 | 0.047 | 0.043 | 0.043 | 0.052 | 0.043 | 0.047 | 0.052 | 0.052 | 0.048 | 0.045 | 0.051 | 0.031 | 0.046 | 0.049 | 0.052 | 0.044 | 0.063 | 0.047      |
| E14 | 0.048 | 0.049 | 0.045 | 0.049 | 0.055 | 0.040 | 0.053 | 0.050 | 0.050 | 0.063 | 0.057 | 0.049 | 0.048 | 0.036 | 0.057 | 0.052 | 0.056 | 0.047 | 0.050      |
| E15 | 0.033 | 0.034 | 0.030 | 0.035 | 0.031 | 0.034 | 0.030 | 0.030 | 0.030 | 0.032 | 0.034 | 0.041 | 0.043 | 0.033 | 0.023 | 0.040 | 0.042 | 0.040 | 0.035      |
| E16 | 0.063 | 0.059 | 0.061 | 0.063 | 0.066 | 0.065 | 0.069 | 0.066 | 0.075 | 0.070 | 0.072 | 0.069 | 0.072 | 0.075 | 0.074 | 0.050 | 0.067 | 0.057 | 0.066      |
| E17 | 0.065 | 0.063 | 0.069 | 0.062 | 0.058 | 0.059 | 0.067 | 0.069 | 0.064 | 0.067 | 0.070 | 0.063 | 0.066 | 0.069 | 0.066 | 0.062 | 0.044 | 0.072 | 0.064      |
| E18 | 0.034 | 0.042 | 0.048 | 0.043 | 0.047 | 0.047 | 0.038 | 0.044 | 0.034 | 0.028 | 0.028 | 0.046 | 0.051 | 0.037 | 0.041 | 0.044 | 0.050 | 0.026 | 0.040      |

Table S142. Case 37's X Influence Matrix.

|     | E1 | E2 | E3 | E4 | E5 | E6 | E7 | E8 | E9 | E10 | E11 | E12 | E13 | E14 | E15 | E16 | E17 | E18 |
|-----|----|----|----|----|----|----|----|----|----|-----|-----|-----|-----|-----|-----|-----|-----|-----|
| E1  | 3  | 4  | 4  | 4  | 4  | 4  | 4  | 4  | 4  | 4   | 4   | 4   | 4   | 4   | 4   | 4   | 4   | 4   |
| E2  | 4  | 2  | 3  | 3  | 2  | 3  | 3  | 3  | 3  | 3   | 3   | 3   | 4   | 3   | 4   | 3   | 4   | 4   |
| E3  | 4  | 3  | 2  | 3  | 2  | 3  | 4  | 4  | 2  | 3   | 3   | 3   | 4   | 3   | 3   | 3   | 4   | 3   |
| E4  | 2  | 2  | 2  | 1  | 1  | 3  | 2  | 2  | 2  | 2   | 2   | 2   | 2   | 2   | 3   | 3   | 2   | 3   |
| E5  | 1  | 1  | 1  | 1  | 0  | 1  | 1  | 1  | 1  | 1   | 1   | 1   | 1   | 1   | 1   | 2   | 2   | 2   |
| E6  | 4  | 2  | 3  | 3  | 1  | 2  | 3  | 3  | 3  | 3   | 3   | 3   | 2   | 4   | 3   | 3   | 3   | 2   |
| E7  | 3  | 2  | 2  | 3  | 2  | 2  | 2  | 4  | 3  | 3   | 3   | 3   | 3   | 3   | 3   | 3   | 3   | 3   |
| E8  | 3  | 3  | 3  | 3  | 1  | 2  | 2  | 2  | 3  | 3   | 3   | 2   | 3   | 3   | 3   | 3   | 3   | 3   |
| E9  | 4  | 3  | 3  | 3  | 2  | 4  | 4  | 4  | 2  | 4   | 3   | 4   | 4   | 4   | 4   | 4   | 4   | 4   |
| E10 | 4  | 3  | 3  | 3  | 3  | 3  | 4  | 4  | 3  | 3   | 4   | 4   | 4   | 4   | 4   | 4   | 4   | 4   |
| E11 | 4  | 3  | 3  | 4  | 4  | 3  | 4  | 3  | 3  | 4   | 2   | 4   | 4   | 4   | 4   | 4   | 4   | 4   |
| E12 | 4  | 3  | 3  | 4  | 2  | 4  | 4  | 4  | 4  | 4   | 4   | 3   | 3   | 4   | 4   | 4   | 4   | 4   |
| E13 | 2  | 2  | 2  | 2  | 2  | 2  | 2  | 3  | 2  | 3   | 2   | 3   | 1   | 2   | 3   | 3   | 2   | 4   |
| E14 | 3  | 2  | 2  | 2  | 2  | 2  | 3  | 3  | 2  | 3   | 3   | 2   | 3   | 2   | 3   | 3   | 3   | 3   |
| E15 | 2  | 1  | 1  | 2  | 1  | 1  | 1  | 1  | 1  | 2   | 2   | 2   | 2   | 2   | 1   | 2   | 2   | 2   |
| E16 | 4  | 3  | 3  | 3  | 2  | 3  | 4  | 4  | 4  | 4   | 4   | 4   | 4   | 4   | 4   | 3   | 4   | 3   |
| E17 | 4  | 3  | 3  | 3  | 2  | 3  | 4  | 4  | 3  | 4   | 4   | 3   | 4   | 4   | 4   | 4   | 2   | 4   |
| E18 | 2  | 2  | 2  | 2  | 2  | 2  | 2  | 2  | 1  | 1   | 1   | 2   | 3   | 2   | 2   | 2   | 3   | 1   |

Table S143. Case 37. Weighted Supermatrix and Priorities, according to procedure 1.

|     | E1    | E2    | E3    | E4    | E5    | E6    | E7    | E8    | E9    | E10   | E11   | E12   | E13   | E14   | E15   | E16   | E17   | E18   | Priorities |
|-----|-------|-------|-------|-------|-------|-------|-------|-------|-------|-------|-------|-------|-------|-------|-------|-------|-------|-------|------------|
| E1  | 0.035 | 0.173 | 0.169 | 0.134 | 0.195 | 0.139 | 0.095 | 0.093 | 0.139 | 0.104 | 0.114 | 0.114 | 0.093 | 0.094 | 0.091 | 0.103 | 0.092 | 0.091 | 0.109      |
| E2  | 0.087 | 0.028 | 0.072 | 0.054 | 0.043 | 0.060 | 0.041 | 0.037 | 0.060 | 0.040 | 0.047 | 0.046 | 0.093 | 0.039 | 0.091 | 0.038 | 0.092 | 0.091 | 0.058      |
| E3  | 0.087 | 0.076 | 0.027 | 0.054 | 0.043 | 0.060 | 0.095 | 0.093 | 0.025 | 0.040 | 0.047 | 0.046 | 0.093 | 0.039 | 0.034 | 0.038 | 0.092 | 0.035 | 0.057      |
| E4  | 0.016 | 0.028 | 0.027 | 0.011 | 0.017 | 0.060 | 0.019 | 0.017 | 0.025 | 0.018 | 0.020 | 0.019 | 0.017 | 0.017 | 0.034 | 0.038 | 0.016 | 0.035 | 0.024      |
| E5  | 0.009 | 0.013 | 0.013 | 0.011 | 0.000 | 0.012 | 0.010 | 0.010 | 0.012 | 0.010 | 0.011 | 0.010 | 0.010 | 0.010 | 0.010 | 0.016 | 0.016 | 0.016 | 0.012      |
| E6  | 0.087 | 0.028 | 0.072 | 0.054 | 0.017 | 0.024 | 0.041 | 0.037 | 0.060 | 0.040 | 0.047 | 0.046 | 0.017 | 0.094 | 0.034 | 0.038 | 0.037 | 0.016 | 0.049      |
| E7  | 0.035 | 0.028 | 0.027 | 0.054 | 0.043 | 0.024 | 0.019 | 0.093 | 0.060 | 0.040 | 0.047 | 0.046 | 0.037 | 0.039 | 0.034 | 0.038 | 0.037 | 0.035 | 0.041      |
| E8  | 0.035 | 0.076 | 0.072 | 0.054 | 0.017 | 0.024 | 0.019 | 0.017 | 0.060 | 0.040 | 0.047 | 0.019 | 0.037 | 0.039 | 0.034 | 0.038 | 0.037 | 0.035 | 0.040      |
| E9  | 0.087 | 0.076 | 0.072 | 0.054 | 0.043 | 0.139 | 0.095 | 0.093 | 0.025 | 0.104 | 0.047 | 0.114 | 0.093 | 0.094 | 0.091 | 0.103 | 0.092 | 0.091 | 0.085      |
| E10 | 0.087 | 0.076 | 0.072 | 0.054 | 0.109 | 0.060 | 0.095 | 0.093 | 0.060 | 0.040 | 0.114 | 0.114 | 0.093 | 0.094 | 0.091 | 0.103 | 0.092 | 0.091 | 0.085      |
| E11 | 0.087 | 0.076 | 0.072 | 0.134 | 0.195 | 0.060 | 0.095 | 0.037 | 0.060 | 0.104 | 0.020 | 0.114 | 0.093 | 0.094 | 0.091 | 0.103 | 0.092 | 0.091 | 0.083      |
| E12 | 0.087 | 0.076 | 0.072 | 0.134 | 0.043 | 0.139 | 0.095 | 0.093 | 0.139 | 0.104 | 0.114 | 0.046 | 0.037 | 0.094 | 0.091 | 0.103 | 0.092 | 0.091 | 0.094      |
| E13 | 0.016 | 0.028 | 0.027 | 0.022 | 0.043 | 0.024 | 0.019 | 0.037 | 0.025 | 0.040 | 0.020 | 0.046 | 0.010 | 0.017 | 0.034 | 0.038 | 0.016 | 0.091 | 0.029      |
| E14 | 0.035 | 0.028 | 0.027 | 0.022 | 0.043 | 0.024 | 0.041 | 0.037 | 0.025 | 0.040 | 0.047 | 0.019 | 0.037 | 0.017 | 0.034 | 0.038 | 0.037 | 0.035 | 0.033      |
| E15 | 0.016 | 0.013 | 0.013 | 0.022 | 0.017 | 0.012 | 0.010 | 0.010 | 0.012 | 0.018 | 0.020 | 0.019 | 0.017 | 0.017 | 0.010 | 0.016 | 0.016 | 0.016 | 0.015      |
| E16 | 0.087 | 0.076 | 0.072 | 0.054 | 0.043 | 0.060 | 0.095 | 0.093 | 0.139 | 0.104 | 0.114 | 0.114 | 0.093 | 0.094 | 0.091 | 0.038 | 0.092 | 0.035 | 0.090      |
| E17 | 0.087 | 0.076 | 0.072 | 0.054 | 0.043 | 0.060 | 0.095 | 0.093 | 0.060 | 0.104 | 0.114 | 0.046 | 0.093 | 0.094 | 0.091 | 0.103 | 0.016 | 0.091 | 0.077      |
| E18 | 0.016 | 0.028 | 0.027 | 0.022 | 0.043 | 0.024 | 0.019 | 0.017 | 0.012 | 0.010 | 0.011 | 0.019 | 0.037 | 0.017 | 0.016 | 0.016 | 0.037 | 0.009 | 0.019      |

Table S144. Case 37. Weighted Supermatrix and Priorities, according to procedure 2.

|     | E1    | E2    | E3    | E4    | E5    | E6    | E7    | E8    | E9    | E10   | E11   | E12   | E13   | E14   | E15   | E16   | E17   | E18   | Priorities |
|-----|-------|-------|-------|-------|-------|-------|-------|-------|-------|-------|-------|-------|-------|-------|-------|-------|-------|-------|------------|
| E1  | 0.035 | 0.173 | 0.169 | 0.134 | 0.188 | 0.139 | 0.095 | 0.093 | 0.139 | 0.104 | 0.114 | 0.114 | 0.093 | 0.094 | 0.091 | 0.103 | 0.092 | 0.091 | 0.109      |
| E2  | 0.087 | 0.028 | 0.072 | 0.054 | 0.044 | 0.060 | 0.041 | 0.037 | 0.060 | 0.040 | 0.047 | 0.046 | 0.093 | 0.039 | 0.091 | 0.038 | 0.092 | 0.091 | 0.058      |
| E3  | 0.087 | 0.076 | 0.027 | 0.054 | 0.044 | 0.060 | 0.095 | 0.093 | 0.025 | 0.040 | 0.047 | 0.046 | 0.093 | 0.039 | 0.034 | 0.038 | 0.092 | 0.035 | 0.057      |
| E4  | 0.016 | 0.028 | 0.027 | 0.011 | 0.017 | 0.060 | 0.019 | 0.017 | 0.025 | 0.018 | 0.020 | 0.019 | 0.017 | 0.017 | 0.034 | 0.038 | 0.016 | 0.035 | 0.024      |
| E5  | 0.009 | 0.013 | 0.013 | 0.011 | 0.010 | 0.012 | 0.010 | 0.010 | 0.012 | 0.010 | 0.011 | 0.010 | 0.010 | 0.010 | 0.010 | 0.016 | 0.016 | 0.016 | 0.012      |
| E6  | 0.087 | 0.028 | 0.072 | 0.054 | 0.017 | 0.024 | 0.041 | 0.037 | 0.060 | 0.040 | 0.047 | 0.046 | 0.017 | 0.094 | 0.034 | 0.038 | 0.037 | 0.016 | 0.049      |
| E7  | 0.035 | 0.028 | 0.027 | 0.054 | 0.044 | 0.024 | 0.019 | 0.093 | 0.060 | 0.040 | 0.047 | 0.046 | 0.037 | 0.039 | 0.034 | 0.038 | 0.037 | 0.035 | 0.041      |
| E8  | 0.035 | 0.076 | 0.072 | 0.054 | 0.017 | 0.024 | 0.019 | 0.017 | 0.060 | 0.040 | 0.047 | 0.019 | 0.037 | 0.039 | 0.034 | 0.038 | 0.037 | 0.035 | 0.040      |
| E9  | 0.087 | 0.076 | 0.072 | 0.054 | 0.044 | 0.139 | 0.095 | 0.093 | 0.025 | 0.104 | 0.047 | 0.114 | 0.093 | 0.094 | 0.091 | 0.103 | 0.092 | 0.091 | 0.085      |
| E10 | 0.087 | 0.076 | 0.072 | 0.054 | 0.107 | 0.060 | 0.095 | 0.093 | 0.060 | 0.040 | 0.114 | 0.114 | 0.093 | 0.094 | 0.091 | 0.103 | 0.092 | 0.091 | 0.085      |
| E11 | 0.087 | 0.076 | 0.072 | 0.134 | 0.188 | 0.060 | 0.095 | 0.037 | 0.060 | 0.104 | 0.020 | 0.114 | 0.093 | 0.094 | 0.091 | 0.103 | 0.092 | 0.091 | 0.083      |
| E12 | 0.087 | 0.076 | 0.072 | 0.134 | 0.044 | 0.139 | 0.095 | 0.093 | 0.139 | 0.104 | 0.114 | 0.046 | 0.037 | 0.094 | 0.091 | 0.103 | 0.092 | 0.091 | 0.094      |
| E13 | 0.016 | 0.028 | 0.027 | 0.022 | 0.044 | 0.024 | 0.019 | 0.037 | 0.025 | 0.040 | 0.020 | 0.046 | 0.010 | 0.017 | 0.034 | 0.038 | 0.016 | 0.091 | 0.029      |
| E14 | 0.035 | 0.028 | 0.027 | 0.022 | 0.044 | 0.024 | 0.041 | 0.037 | 0.025 | 0.040 | 0.047 | 0.019 | 0.037 | 0.017 | 0.034 | 0.038 | 0.037 | 0.035 | 0.033      |
| E15 | 0.016 | 0.013 | 0.013 | 0.022 | 0.017 | 0.012 | 0.010 | 0.010 | 0.012 | 0.018 | 0.020 | 0.019 | 0.017 | 0.017 | 0.010 | 0.016 | 0.016 | 0.016 | 0.015      |
| E16 | 0.087 | 0.076 | 0.072 | 0.054 | 0.044 | 0.060 | 0.095 | 0.093 | 0.139 | 0.104 | 0.114 | 0.114 | 0.093 | 0.094 | 0.091 | 0.038 | 0.092 | 0.035 | 0.090      |
| E17 | 0.087 | 0.076 | 0.072 | 0.054 | 0.044 | 0.060 | 0.095 | 0.093 | 0.060 | 0.104 | 0.114 | 0.046 | 0.093 | 0.094 | 0.091 | 0.103 | 0.016 | 0.091 | 0.077      |
| E18 | 0.016 | 0.028 | 0.027 | 0.022 | 0.044 | 0.024 | 0.019 | 0.017 | 0.012 | 0.010 | 0.011 | 0.019 | 0.037 | 0.017 | 0.016 | 0.016 | 0.037 | 0.009 | 0.019      |

Table S145. Case 38. Original Weighted Supermatrix and Priorities.

|     | E1    | E2    | E3    | E4    | E5    | E6    | E7    | E8    | E9    | E10   | Priorities |
|-----|-------|-------|-------|-------|-------|-------|-------|-------|-------|-------|------------|
| E1  | 0.048 | 0.093 | 0.099 | 0.111 | 0.102 | 0.102 | 0.105 | 0.090 | 0.095 | 0.103 | 0.094      |
| E2  | 0.145 | 0.076 | 0.150 | 0.125 | 0.132 | 0.136 | 0.130 | 0.132 | 0.134 | 0.122 | 0.127      |
| E3  | 0.154 | 0.179 | 0.099 | 0.140 | 0.143 | 0.139 | 0.142 | 0.154 | 0.148 | 0.151 | 0.145      |
| E4  | 0.040 | 0.040 | 0.042 | 0.022 | 0.039 | 0.038 | 0.038 | 0.053 | 0.050 | 0.056 | 0.045      |
| E5  | 0.096 | 0.097 | 0.081 | 0.086 | 0.060 | 0.110 | 0.082 | 0.092 | 0.105 | 0.089 | 0.090      |
| E6  | 0.054 | 0.048 | 0.061 | 0.080 | 0.105 | 0.043 | 0.099 | 0.069 | 0.062 | 0.068 | 0.066      |
| E7  | 0.028 | 0.032 | 0.033 | 0.050 | 0.034 | 0.046 | 0.018 | 0.024 | 0.020 | 0.025 | 0.029      |
| E8  | 0.115 | 0.141 | 0.144 | 0.117 | 0.107 | 0.110 | 0.118 | 0.067 | 0.102 | 0.117 | 0.115      |
| E9  | 0.140 | 0.141 | 0.128 | 0.120 | 0.129 | 0.118 | 0.117 | 0.148 | 0.076 | 0.165 | 0.131      |
| E10 | 0.180 | 0.153 | 0.163 | 0.149 | 0.151 | 0.158 | 0.152 | 0.171 | 0.208 | 0.104 | 0.158      |

Table S146. Case 38's X Influence Matrix.

|     | E1 | E2 | E3 | E4 | E5 | E6 | E7 | E8 | E9 | E10 |
|-----|----|----|----|----|----|----|----|----|----|-----|
| E1  | 1  | 2  | 3  | 3  | 3  | 3  | 3  | 2  | 2  | 3   |
| E2  | 4  | 2  | 4  | 4  | 4  | 4  | 4  | 3  | 3  | 3   |
| E3  | 4  | 4  | 3  | 4  | 4  | 4  | 4  | 4  | 3  | 4   |
| E4  | 1  | 1  | 1  | 0  | 1  | 1  | 1  | 1  | 1  | 1   |
| E5  | 2  | 2  | 2  | 2  | 1  | 3  | 2  | 2  | 2  | 2   |
| E6  | 1  | 1  | 1  | 2  | 3  | 1  | 3  | 2  | 1  | 2   |
| E7  | 0  | 0  | 1  | 1  | 1  | 1  | 0  | 0  | 0  | 0   |
| E8  | 3  | 3  | 4  | 3  | 3  | 3  | 3  | 1  | 2  | 3   |
| E9  | 3  | 3  | 3  | 4  | 4  | 3  | 3  | 4  | 1  | 4   |
| E10 | 4  | 4  | 4  | 4  | 4  | 4  | 4  | 4  | 4  | 3   |

Table S147. Case 38. Weighted Supermatrix and Priorities, according to procedure 1.

|     | E1    | E2    | E3    | E4    | E5    | E6    | E7    | E8    | E9    | E10   | Priorities |
|-----|-------|-------|-------|-------|-------|-------|-------|-------|-------|-------|------------|
| E1  | 0.025 | 0.055 | 0.091 | 0.079 | 0.075 | 0.084 | 0.080 | 0.051 | 0.074 | 0.101 | 0.075      |
| E2  | 0.223 | 0.055 | 0.206 | 0.187 | 0.178 | 0.201 | 0.208 | 0.112 | 0.172 | 0.101 | 0.145      |
| E3  | 0.223 | 0.266 | 0.091 | 0.187 | 0.178 | 0.201 | 0.208 | 0.229 | 0.172 | 0.247 | 0.198      |
| E4  | 0.025 | 0.025 | 0.022 | 0.000 | 0.020 | 0.021 | 0.020 | 0.024 | 0.031 | 0.022 | 0.023      |
| E5  | 0.051 | 0.055 | 0.044 | 0.036 | 0.020 | 0.084 | 0.036 | 0.051 | 0.074 | 0.041 | 0.051      |
| E6  | 0.025 | 0.025 | 0.022 | 0.036 | 0.075 | 0.021 | 0.080 | 0.051 | 0.031 | 0.041 | 0.035      |
| E7  | 0.000 | 0.000 | 0.022 | 0.020 | 0.020 | 0.021 | 0.000 | 0.000 | 0.000 | 0.000 | 0.007      |
| E8  | 0.103 | 0.127 | 0.206 | 0.079 | 0.075 | 0.084 | 0.080 | 0.024 | 0.074 | 0.101 | 0.111      |
| E9  | 0.103 | 0.127 | 0.091 | 0.187 | 0.178 | 0.084 | 0.080 | 0.229 | 0.031 | 0.247 | 0.143      |
| E10 | 0.223 | 0.266 | 0.206 | 0.187 | 0.178 | 0.201 | 0.208 | 0.229 | 0.340 | 0.101 | 0.213      |

Table S148. Case 38. Weighted Supermatrix and Priorities, according to procedure 2.

|     | E1    | E2    | E3    | E4    | E5    | E6    | E7    | E8    | E9    | E10   | Priorities |
|-----|-------|-------|-------|-------|-------|-------|-------|-------|-------|-------|------------|
| E1  | 0.026 | 0.057 | 0.091 | 0.081 | 0.075 | 0.084 | 0.082 | 0.054 | 0.076 | 0.101 | 0.076      |
| E2  | 0.214 | 0.057 | 0.206 | 0.181 | 0.178 | 0.201 | 0.199 | 0.113 | 0.168 | 0.101 | 0.145      |
| E3  | 0.214 | 0.253 | 0.091 | 0.181 | 0.178 | 0.201 | 0.199 | 0.220 | 0.168 | 0.234 | 0.191      |
| E4  | 0.026 | 0.027 | 0.022 | 0.013 | 0.020 | 0.021 | 0.022 | 0.026 | 0.033 | 0.024 | 0.025      |
| E5  | 0.054 | 0.057 | 0.044 | 0.039 | 0.020 | 0.084 | 0.039 | 0.054 | 0.076 | 0.045 | 0.052      |
| E6  | 0.026 | 0.027 | 0.022 | 0.039 | 0.075 | 0.021 | 0.082 | 0.054 | 0.033 | 0.045 | 0.037      |
| E7  | 0.015 | 0.015 | 0.022 | 0.022 | 0.020 | 0.021 | 0.014 | 0.015 | 0.017 | 0.014 | 0.017      |
| E8  | 0.104 | 0.126 | 0.206 | 0.081 | 0.075 | 0.084 | 0.082 | 0.026 | 0.076 | 0.101 | 0.110      |
| E9  | 0.104 | 0.126 | 0.091 | 0.181 | 0.178 | 0.084 | 0.082 | 0.220 | 0.033 | 0.234 | 0.139      |
| E10 | 0.214 | 0.253 | 0.206 | 0.181 | 0.178 | 0.201 | 0.199 | 0.220 | 0.320 | 0.101 | 0.207      |

Table S149. Case 39. Original Weighted Supermatrix and Priorities.

|     | E1    | E2    | E3    | E4    | E5    | E6    | E7    | E8    | E9    | E10   | E11   | E12   | E13   | E14   | E15   | E16   | E17   | E18   | Priorities |
|-----|-------|-------|-------|-------|-------|-------|-------|-------|-------|-------|-------|-------|-------|-------|-------|-------|-------|-------|------------|
| E1  | 0.000 | 0.000 | 0.000 | 0.034 | 0.129 | 0.032 | 0.012 | 0.006 | 0.012 | 0.006 | 0.085 | 0.014 | 0.013 | 0.009 | 0.007 | 0.250 | 0.275 | 0.155 | 0.070      |
| E2  | 0.000 | 0.000 | 0.000 | 0.004 | 0.017 | 0.004 | 0.040 | 0.038 | 0.034 | 0.013 | 0.028 | 0.093 | 0.013 | 0.006 | 0.007 | 0.500 | 0.120 | 0.098 | 0.073      |
| E3  | 0.000 | 0.000 | 0.000 | 0.002 | 0.018 | 0.004 | 0.005 | 0.013 | 0.095 | 0.038 | 0.028 | 0.035 | 0.088 | 0.045 | 0.046 | 0.250 | 0.105 | 0.247 | 0.066      |
| E4  | 0.385 | 0.385 | 0.385 | 0.000 | 0.000 | 0.474 | 0.000 | 0.000 | 0.000 | 0.000 | 0.000 | 0.000 | 0.000 | 0.000 | 0.000 | 0.000 | 0.000 | 0.000 | 0.108      |
| E5  | 0.063 | 0.063 | 0.063 | 0.237 | 0.000 | 0.000 | 0.000 | 0.000 | 0.000 | 0.000 | 0.000 | 0.000 | 0.000 | 0.000 | 0.000 | 0.000 | 0.000 | 0.000 | 0.039      |
| E6  | 0.156 | 0.156 | 0.156 | 0.237 | 0.000 | 0.000 | 0.000 | 0.000 | 0.000 | 0.000 | 0.000 | 0.000 | 0.000 | 0.000 | 0.000 | 0.000 | 0.000 | 0.000 | 0.058      |
| E7  | 0.018 | 0.020 | 0.015 | 0.034 | 0.539 | 0.000 | 0.000 | 0.000 | 0.000 | 0.119 | 0.000 | 0.000 | 0.073 | 0.025 | 0.000 | 0.000 | 0.000 | 0.000 | 0.036      |
| E8  | 0.008 | 0.007 | 0.015 | 0.000 | 0.071 | 0.000 | 0.000 | 0.000 | 0.000 | 0.000 | 0.000 | 0.000 | 0.064 | 0.042 | 0.000 | 0.000 | 0.000 | 0.000 | 0.010      |
| E9  | 0.023 | 0.026 | 0.032 | 0.000 | 0.000 | 0.000 | 0.597 | 0.597 | 0.000 | 0.478 | 0.000 | 0.000 | 0.000 | 0.000 | 0.000 | 0.000 | 0.000 | 0.000 | 0.046      |
| E10 | 0.037 | 0.028 | 0.022 | 0.000 | 0.226 | 0.203 | 0.000 | 0.000 | 0.000 | 0.000 | 0.000 | 0.000 | 0.000 | 0.024 | 0.000 | 0.000 | 0.000 | 0.000 | 0.028      |
| E11 | 0.068 | 0.061 | 0.070 | 0.169 | 0.000 | 0.000 | 0.000 | 0.000 | 0.000 | 0.000 | 0.000 | 0.000 | 0.170 | 0.118 | 0.296 | 0.000 | 0.000 | 0.000 | 0.064      |
| E12 | 0.020 | 0.032 | 0.019 | 0.000 | 0.000 | 0.000 | 0.000 | 0.000 | 0.000 | 0.000 | 0.000 | 0.000 | 0.256 | 0.087 | 0.000 | 0.000 | 0.000 | 0.000 | 0.020      |
| E13 | 0.018 | 0.018 | 0.018 | 0.036 | 0.000 | 0.000 | 0.000 | 0.000 | 0.000 | 0.000 | 0.000 | 0.000 | 0.000 | 0.645 | 0.000 | 0.000 | 0.000 | 0.000 | 0.041      |
| E14 | 0.044 | 0.044 | 0.044 | 0.000 | 0.000 | 0.036 | 0.000 | 0.000 | 0.000 | 0.000 | 0.000 | 0.000 | 0.000 | 0.000 | 0.645 | 0.000 | 0.000 | 0.000 | 0.052      |
| E15 | 0.108 | 0.108 | 0.108 | 0.248 | 0.000 | 0.248 | 0.000 | 0.000 | 0.000 | 0.000 | 0.000 | 0.000 | 0.000 | 0.000 | 0.000 | 0.000 | 0.000 | 0.000 | 0.064      |
| E16 | 0.032 | 0.032 | 0.032 | 0.000 | 0.000 | 0.000 | 0.346 | 0.000 | 0.097 | 0.000 | 0.000 | 0.686 | 0.000 | 0.000 | 0.000 | 0.000 | 0.500 | 0.500 | 0.100      |
| E17 | 0.006 | 0.006 | 0.006 | 0.000 | 0.000 | 0.000 | 0.000 | 0.000 | 0.153 | 0.069 | 0.686 | 0.172 | 0.000 | 0.000 | 0.000 | 0.000 | 0.000 | 0.000 | 0.058      |
| E18 | 0.014 | 0.014 | 0.014 | 0.000 | 0.000 | 0.000 | 0.000 | 0.346 | 0.608 | 0.277 | 0.172 | 0.000 | 0.322 | 0.000 | 0.000 | 0.000 | 0.000 | 0.000 | 0.066      |

Table S150. Case 39's X Influence Matrix.

|     | E1 | E2 | E3 | E4 | E5 | E6 | E7 | E8 | E9 | E10 | E11 | E12 | E13 | E14 | E15 | E16 | E17 | E18 |
|-----|----|----|----|----|----|----|----|----|----|-----|-----|-----|-----|-----|-----|-----|-----|-----|
| E1  | 0  | 0  | 0  | 0  | 1  | 0  | 0  | 0  | 0  | 0   | 0   | 0   | 0   | 0   | 0   | 2   | 2   | 1   |
| E2  | 0  | 0  | 0  | 0  | 0  | 0  | 0  | 0  | 0  | 0   | 0   | 0   | 0   | 0   | 0   | 4   | 1   | 0   |
| E3  | 0  | 0  | 0  | 0  | 0  | 0  | 0  | 0  | 0  | 0   | 0   | 0   | 1   | 0   | 0   | 2   | 1   | 2   |
| E4  | 4  | 4  | 4  | 0  | 0  | 4  | 0  | 0  | 0  | 0   | 0   | 0   | 0   | 0   | 0   | 0   | 0   | 0   |
| E5  | 0  | 0  | 0  | 4  | 0  | 0  | 0  | 0  | 0  | 0   | 0   | 0   | 0   | 0   | 0   | 0   | 0   | 0   |
| E6  | 2  | 2  | 2  | 4  | 0  | 0  | 0  | 0  | 0  | 0   | 0   | 0   | 0   | 0   | 0   | 0   | 0   | 0   |
| E7  | 0  | 0  | 0  | 0  | 4  | 0  | 0  | 0  | 0  | 1   | 0   | 0   | 1   | 0   | 0   | 0   | 0   | 0   |
| E8  | 0  | 0  | 0  | 0  | 0  | 0  | 0  | 0  | 0  | 0   | 0   | 0   | 0   | 0   | 0   | 0   | 0   | 0   |
| E9  | 0  | 0  | 0  | 0  | 0  | 0  | 4  | 4  | 0  | 4   | 0   | 0   | 0   | 0   | 0   | 0   | 0   | 0   |
| E10 | 0  | 0  | 0  | 0  | 2  | 2  | 0  | 0  | 0  | 0   | 0   | 0   | 0   | 0   | 0   | 0   | 0   | 0   |
| E11 | 0  | 0  | 0  | 3  | 0  | 0  | 0  | 0  | 0  | 0   | 0   | 0   | 2   | 0   | 2   | 0   | 0   | 0   |
| E12 | 0  | 0  | 0  | 0  | 0  | 0  | 0  | 0  | 0  | 0   | 0   | 0   | 3   | 0   | 0   | 0   | 0   | 0   |
| E13 | 0  | 0  | 0  | 0  | 0  | 0  | 0  | 0  | 0  | 0   | 0   | 0   | 0   | 4   | 0   | 0   | 0   | 0   |
| E14 | 0  | 0  | 0  | 0  | 0  | 0  | 0  | 0  | 0  | 0   | 0   | 0   | 0   | 0   | 4   | 0   | 0   | 0   |
| E15 | 1  | 1  | 1  | 4  | 0  | 2  | 0  | 0  | 0  | 0   | 0   | 0   | 0   | 0   | 0   | 0   | 0   | 0   |
| E16 | 0  | 0  | 0  | 0  | 0  | 0  | 2  | 0  | 0  | 0   | 0   | 4   | 0   | 0   | 0   | 0   | 4   | 4   |
| E17 | 0  | 0  | 0  | 0  | 0  | 0  | 0  | 0  | 1  | 0   | 4   | 1   | 0   | 0   | 0   | 0   | 0   | 0   |
| E18 | 0  | 0  | 0  | 0  | 0  | 0  | 0  | 2  | 4  | 2   | 1   | 0   | 4   | 0   | 0   | 0   | 0   | 0   |

Table S151. Case 39. Weighted Supermatrix and Priorities, according to procedure 1.

|     | E1    | E2    | E3    | E4    | E5    | E6    | E7    | E8    | E9    | E10   | E11   | E12   | E13   | E14   | E15   | E16   | E17   | E18   | Priorities |
|-----|-------|-------|-------|-------|-------|-------|-------|-------|-------|-------|-------|-------|-------|-------|-------|-------|-------|-------|------------|
| E1  | 0.000 | 0.000 | 0.000 | 0.000 | 0.081 | 0.000 | 0.000 | 0.000 | 0.000 | 0.000 | 0.000 | 0.000 | 0.000 | 0.000 | 0.000 | 0.143 | 0.191 | 0.081 | 0.033      |
| E2  | 0.000 | 0.000 | 0.000 | 0.000 | 0.000 | 0.000 | 0.000 | 0.000 | 0.000 | 0.000 | 0.000 | 0.000 | 0.000 | 0.000 | 0.000 | 0.714 | 0.076 | 0.000 | 0.077      |
| E3  | 0.000 | 0.000 | 0.000 | 0.000 | 0.000 | 0.000 | 0.000 | 0.000 | 0.000 | 0.000 | 0.000 | 0.000 | 0.053 | 0.000 | 0.000 | 0.143 | 0.076 | 0.188 | 0.036      |
| E4  | 0.731 | 0.731 | 0.731 | 0.000 | 0.000 | 0.714 | 0.000 | 0.000 | 0.000 | 0.000 | 0.000 | 0.000 | 0.000 | 0.000 | 0.000 | 0.000 | 0.000 | 0.000 | 0.161      |
| E5  | 0.000 | 0.000 | 0.000 | 0.300 | 0.000 | 0.000 | 0.000 | 0.000 | 0.000 | 0.000 | 0.000 | 0.000 | 0.000 | 0.000 | 0.000 | 0.000 | 0.000 | 0.000 | 0.048      |
| E6  | 0.188 | 0.188 | 0.188 | 0.300 | 0.000 | 0.000 | 0.000 | 0.000 | 0.000 | 0.000 | 0.000 | 0.000 | 0.000 | 0.000 | 0.000 | 0.000 | 0.000 | 0.000 | 0.076      |
| E7  | 0.000 | 0.000 | 0.000 | 0.000 | 0.731 | 0.000 | 0.000 | 0.000 | 0.000 | 0.081 | 0.000 | 0.000 | 0.053 | 0.000 | 0.000 | 0.000 | 0.000 | 0.000 | 0.040      |
| E8  | 0.000 | 0.000 | 0.000 | 0.000 | 0.000 | 0.000 | 0.000 | 0.000 | 0.000 | 0.000 | 0.000 | 0.000 | 0.000 | 0.000 | 0.000 | 0.000 | 0.000 | 0.000 | 0.000      |
| E9  | 0.000 | 0.000 | 0.000 | 0.000 | 0.000 | 0.000 | 0.833 | 0.833 | 0.000 | 0.731 | 0.000 | 0.000 | 0.000 | 0.000 | 0.000 | 0.000 | 0.000 | 0.000 | 0.048      |
| E10 | 0.000 | 0.000 | 0.000 | 0.000 | 0.188 | 0.143 | 0.000 | 0.000 | 0.000 | 0.000 | 0.000 | 0.000 | 0.000 | 0.000 | 0.000 | 0.000 | 0.000 | 0.000 | 0.020      |
| E11 | 0.000 | 0.000 | 0.000 | 0.100 | 0.000 | 0.000 | 0.000 | 0.000 | 0.000 | 0.000 | 0.000 | 0.000 | 0.122 | 0.000 | 0.167 | 0.000 | 0.000 | 0.000 | 0.035      |
| E12 | 0.000 | 0.000 | 0.000 | 0.000 | 0.000 | 0.000 | 0.000 | 0.000 | 0.000 | 0.000 | 0.000 | 0.000 | 0.258 | 0.000 | 0.000 | 0.000 | 0.000 | 0.000 | 0.015      |
| E13 | 0.000 | 0.000 | 0.000 | 0.000 | 0.000 | 0.000 | 0.000 | 0.000 | 0.000 | 0.000 | 0.000 | 0.000 | 0.000 | 1.000 | 0.000 | 0.000 | 0.000 | 0.000 | 0.059      |
| E14 | 0.000 | 0.000 | 0.000 | 0.000 | 0.000 | 0.000 | 0.000 | 0.000 | 0.000 | 0.000 | 0.000 | 0.000 | 0.000 | 0.000 | 0.833 | 0.000 | 0.000 | 0.000 | 0.059      |
| E15 | 0.081 | 0.081 | 0.081 | 0.300 | 0.000 | 0.143 | 0.000 | 0.000 | 0.000 | 0.000 | 0.000 | 0.000 | 0.000 | 0.000 | 0.000 | 0.000 | 0.000 | 0.000 | 0.071      |
| E16 | 0.000 | 0.000 | 0.000 | 0.000 | 0.000 | 0.000 | 0.167 | 0.000 | 0.000 | 0.000 | 0.000 | 0.875 | 0.000 | 0.000 | 0.000 | 0.000 | 0.657 | 0.731 | 0.104      |
| E17 | 0.000 | 0.000 | 0.000 | 0.000 | 0.000 | 0.000 | 0.000 | 0.000 | 0.125 | 0.000 | 0.875 | 0.125 | 0.000 | 0.000 | 0.000 | 0.000 | 0.000 | 0.000 | 0.039      |
| E18 | 0.000 | 0.000 | 0.000 | 0.000 | 0.000 | 0.000 | 0.000 | 0.167 | 0.875 | 0.188 | 0.125 | 0.000 | 0.514 | 0.000 | 0.000 | 0.000 | 0.000 | 0.000 | 0.080      |

Table S152. Case 39. Weighted Supermatrix and Priorities, according to procedure 2.

|     | E1    | E2    | E3    | E4    | E5    | E6    | E7    | E8    | E9    | E10   | E11   | E12   | E13   | E14   | E15   | E16   | E17   | E18   | Priorities |
|-----|-------|-------|-------|-------|-------|-------|-------|-------|-------|-------|-------|-------|-------|-------|-------|-------|-------|-------|------------|
| E1  | 0.030 | 0.030 | 0.030 | 0.020 | 0.085 | 0.028 | 0.033 | 0.033 | 0.035 | 0.030 | 0.035 | 0.035 | 0.023 | 0.038 | 0.033 | 0.136 | 0.144 | 0.085 | 0.051      |
| E2  | 0.030 | 0.030 | 0.030 | 0.020 | 0.030 | 0.028 | 0.033 | 0.033 | 0.035 | 0.030 | 0.035 | 0.035 | 0.023 | 0.038 | 0.033 | 0.303 | 0.078 | 0.030 | 0.055      |
| E3  | 0.030 | 0.030 | 0.030 | 0.020 | 0.030 | 0.028 | 0.033 | 0.033 | 0.035 | 0.030 | 0.035 | 0.035 | 0.063 | 0.038 | 0.033 | 0.136 | 0.078 | 0.150 | 0.052      |
| E4  | 0.315 | 0.315 | 0.315 | 0.020 | 0.030 | 0.303 | 0.033 | 0.033 | 0.035 | 0.030 | 0.035 | 0.035 | 0.023 | 0.038 | 0.033 | 0.028 | 0.028 | 0.030 | 0.093      |
| E5  | 0.030 | 0.030 | 0.030 | 0.196 | 0.030 | 0.028 | 0.033 | 0.033 | 0.035 | 0.030 | 0.035 | 0.035 | 0.023 | 0.038 | 0.033 | 0.028 | 0.028 | 0.030 | 0.046      |
| E6  | 0.150 | 0.150 | 0.150 | 0.196 | 0.030 | 0.028 | 0.033 | 0.033 | 0.035 | 0.030 | 0.035 | 0.035 | 0.023 | 0.038 | 0.033 | 0.028 | 0.028 | 0.030 | 0.065      |
| E7  | 0.030 | 0.030 | 0.030 | 0.020 | 0.315 | 0.028 | 0.033 | 0.033 | 0.035 | 0.085 | 0.035 | 0.035 | 0.063 | 0.038 | 0.033 | 0.028 | 0.028 | 0.030 | 0.047      |
| E8  | 0.030 | 0.030 | 0.030 | 0.020 | 0.030 | 0.028 | 0.033 | 0.033 | 0.035 | 0.030 | 0.035 | 0.035 | 0.023 | 0.038 | 0.033 | 0.028 | 0.028 | 0.030 | 0.030      |
| E9  | 0.030 | 0.030 | 0.030 | 0.020 | 0.030 | 0.028 | 0.321 | 0.321 | 0.035 | 0.315 | 0.035 | 0.035 | 0.023 | 0.038 | 0.033 | 0.028 | 0.028 | 0.030 | 0.064      |
| E10 | 0.030 | 0.030 | 0.030 | 0.020 | 0.150 | 0.136 | 0.033 | 0.033 | 0.035 | 0.030 | 0.035 | 0.035 | 0.023 | 0.038 | 0.033 | 0.028 | 0.028 | 0.030 | 0.043      |
| E11 | 0.030 | 0.030 | 0.030 | 0.128 | 0.030 | 0.028 | 0.033 | 0.033 | 0.035 | 0.030 | 0.035 | 0.035 | 0.116 | 0.038 | 0.157 | 0.028 | 0.028 | 0.030 | 0.052      |
| E12 | 0.030 | 0.030 | 0.030 | 0.020 | 0.030 | 0.028 | 0.033 | 0.033 | 0.035 | 0.030 | 0.035 | 0.035 | 0.184 | 0.038 | 0.033 | 0.028 | 0.028 | 0.030 | 0.037      |
| E13 | 0.030 | 0.030 | 0.030 | 0.020 | 0.030 | 0.028 | 0.033 | 0.033 | 0.035 | 0.030 | 0.035 | 0.035 | 0.023 | 0.346 | 0.033 | 0.028 | 0.028 | 0.030 | 0.045      |
| E14 | 0.030 | 0.030 | 0.030 | 0.020 | 0.030 | 0.028 | 0.033 | 0.033 | 0.035 | 0.030 | 0.035 | 0.035 | 0.023 | 0.038 | 0.321 | 0.028 | 0.028 | 0.030 | 0.048      |
| E15 | 0.085 | 0.085 | 0.085 | 0.196 | 0.030 | 0.136 | 0.033 | 0.033 | 0.035 | 0.030 | 0.035 | 0.035 | 0.023 | 0.038 | 0.033 | 0.028 | 0.028 | 0.030 | 0.062      |
| E16 | 0.030 | 0.030 | 0.030 | 0.020 | 0.030 | 0.028 | 0.157 | 0.033 | 0.035 | 0.030 | 0.035 | 0.338 | 0.023 | 0.038 | 0.033 | 0.028 | 0.310 | 0.315 | 0.083      |
| E17 | 0.030 | 0.030 | 0.030 | 0.020 | 0.030 | 0.028 | 0.033 | 0.033 | 0.102 | 0.030 | 0.338 | 0.102 | 0.023 | 0.038 | 0.033 | 0.028 | 0.028 | 0.030 | 0.052      |
| E18 | 0.030 | 0.030 | 0.030 | 0.020 | 0.030 | 0.028 | 0.033 | 0.157 | 0.338 | 0.150 | 0.102 | 0.035 | 0.274 | 0.038 | 0.033 | 0.028 | 0.028 | 0.030 | 0.073      |

Table S153. Case 40. Original Weighted Supermatrix and Priorities.

|     | E1    | E2    | E3    | E4    | E5    | E6    | E7    | E8    | E9    | E10   | E11   | E12   | E13   | E14   | E15   | E16   | E17   | Priorities |
|-----|-------|-------|-------|-------|-------|-------|-------|-------|-------|-------|-------|-------|-------|-------|-------|-------|-------|------------|
| E1  | 0.000 | 0.000 | 0.000 | 0.000 | 0.000 | 0.049 | 0.066 | 0.060 | 0.058 | 0.058 | 0.064 | 0.067 | 0.068 | 0.000 | 0.000 | 0.000 | 0.000 | 0.031      |
| E2  | 0.000 | 0.000 | 0.000 | 0.000 | 0.000 | 0.074 | 0.070 | 0.054 | 0.062 | 0.073 | 0.064 | 0.071 | 0.069 | 0.000 | 0.000 | 0.000 | 0.000 | 0.035      |
| E3  | 0.000 | 0.000 | 0.000 | 0.000 | 0.000 | 0.036 | 0.029 | 0.041 | 0.038 | 0.034 | 0.038 | 0.039 | 0.037 | 0.000 | 0.000 | 0.000 | 0.000 | 0.018      |
| E4  | 0.000 | 0.000 | 0.000 | 0.000 | 0.000 | 0.031 | 0.030 | 0.034 | 0.038 | 0.034 | 0.035 | 0.008 | 0.005 | 0.000 | 0.000 | 0.000 | 0.000 | 0.013      |
| E5  | 0.000 | 0.000 | 0.000 | 0.000 | 0.000 | 0.046 | 0.041 | 0.046 | 0.042 | 0.037 | 0.034 | 0.051 | 0.058 | 0.000 | 0.000 | 0.000 | 0.000 | 0.023      |
| E6  | 0.163 | 0.145 | 0.145 | 0.114 | 0.137 | 0.256 | 0.000 | 0.000 | 0.000 | 0.000 | 0.000 | 0.000 | 0.000 | 0.233 | 0.188 | 0.100 | 0.104 | 0.112      |
| E7  | 0.121 | 0.132 | 0.138 | 0.092 | 0.115 | 0.000 | 0.256 | 0.000 | 0.000 | 0.000 | 0.000 | 0.000 | 0.000 | 0.189 | 0.187 | 0.092 | 0.104 | 0.100      |
| E8  | 0.011 | 0.018 | 0.019 | 0.026 | 0.016 | 0.000 | 0.000 | 0.256 | 0.000 | 0.000 | 0.000 | 0.000 | 0.000 | 0.000 | 0.105 | 0.012 | 0.023 | 0.022      |
| E9  | 0.048 | 0.060 | 0.053 | 0.068 | 0.057 | 0.000 | 0.000 | 0.000 | 0.256 | 0.000 | 0.000 | 0.000 | 0.000 | 0.170 | 0.130 | 0.072 | 0.062 | 0.072      |
| E10 | 0.014 | 0.010 | 0.026 | 0.019 | 0.014 | 0.000 | 0.000 | 0.000 | 0.000 | 0.256 | 0.000 | 0.000 | 0.000 | 0.012 | 0.017 | 0.005 | 0.023 | 0.009      |
| E11 | 0.026 | 0.034 | 0.038 | 0.066 | 0.035 | 0.000 | 0.000 | 0.000 | 0.000 | 0.000 | 0.256 | 0.000 | 0.000 | 0.111 | 0.128 | 0.066 | 0.061 | 0.057      |
| E12 | 0.106 | 0.085 | 0.064 | 0.082 | 0.087 | 0.000 | 0.000 | 0.000 | 0.000 | 0.000 | 0.000 | 0.256 | 0.000 | 0.165 | 0.125 | 0.091 | 0.071 | 0.077      |
| E13 | 0.057 | 0.062 | 0.063 | 0.079 | 0.085 | 0.000 | 0.000 | 0.000 | 0.000 | 0.000 | 0.000 | 0.000 | 0.256 | 0.120 | 0.120 | 0.080 | 0.069 | 0.064      |
| E14 | 0.250 | 0.266 | 0.276 | 0.245 | 0.282 | 0.135 | 0.151 | 0.230 | 0.172 | 0.097 | 0.154 | 0.206 | 0.104 | 0.000 | 0.000 | 0.268 | 0.313 | 0.143      |
| E15 | 0.204 | 0.188 | 0.178 | 0.209 | 0.172 | 0.162 | 0.146 | 0.067 | 0.125 | 0.200 | 0.143 | 0.091 | 0.193 | 0.000 | 0.000 | 0.214 | 0.169 | 0.116      |
| E16 | 0.000 | 0.000 | 0.000 | 0.000 | 0.000 | 0.130 | 0.111 | 0.150 | 0.113 | 0.128 | 0.117 | 0.125 | 0.089 | 0.000 | 0.000 | 0.000 | 0.000 | 0.060      |
| E17 | 0.000 | 0.000 | 0.000 | 0.000 | 0.000 | 0.081 | 0.100 | 0.061 | 0.098 | 0.083 | 0.094 | 0.086 | 0.122 | 0.000 | 0.000 | 0.000 | 0.000 | 0.048      |

Table S154. Case 40's X Influence Matrix.

|     | E1 | E2 | E3 | E4 | E5 | E6 | E7 | E8 | E9 | E10 | E11 | E12 | E13 | E14 | E15 | E16 | E17 |
|-----|----|----|----|----|----|----|----|----|----|-----|-----|-----|-----|-----|-----|-----|-----|
| E1  | 0  | 0  | 0  | 0  | 0  | 0  | 1  | 1  | 1  | 1   | 1   | 1   | 1   | 0   | 0   | 0   | 0   |
| E2  | 0  | 0  | 0  | 0  | 0  | 1  | 1  | 1  | 1  | 1   | 1   | 1   | 1   | 0   | 0   | 0   | 0   |
| E3  | 0  | 0  | 0  | 0  | 0  | 0  | 0  | 0  | 0  | 0   | 0   | 0   | 0   | 0   | 0   | 0   | 0   |
| E4  | 0  | 0  | 0  | 0  | 0  | 0  | 0  | 0  | 0  | 0   | 0   | 0   | 0   | 0   | 0   | 0   | 0   |
| E5  | 0  | 0  | 0  | 0  | 0  | 0  | 0  | 0  | 0  | 0   | 0   | 0   | 1   | 0   | 0   | 0   | 0   |
| E6  | 3  | 2  | 2  | 2  | 2  | 4  | 0  | 0  | 0  | 0   | 0   | 0   | 0   | 4   | 4   | 1   | 1   |
| E7  | 2  | 2  | 2  | 1  | 2  | 0  | 4  | 0  | 0  | 0   | 0   | 0   | 0   | 4   | 4   | 1   | 1   |
| E8  | 0  | 0  | 0  | 0  | 0  | 0  | 0  | 4  | 0  | 0   | 0   | 0   | 0   | 0   | 2   | 0   | 0   |
| E9  | 0  | 1  | 0  | 1  | 1  | 0  | 0  | 0  | 4  | 0   | 0   | 0   | 0   | 3   | 3   | 1   | 0   |
| E10 | 0  | 0  | 0  | 0  | 0  | 0  | 0  | 0  | 0  | 4   | 0   | 0   | 0   | 0   | 0   | 0   | 0   |
| E11 | 0  | 0  | 0  | 1  | 0  | 0  | 0  | 0  | 0  | 0   | 4   | 0   | 0   | 2   | 3   | 1   | 0   |
| E12 | 2  | 1  | 1  | 1  | 1  | 0  | 0  | 0  | 0  | 0   | 0   | 4   | 0   | 3   | 3   | 1   | 1   |
| E13 | 1  | 1  | 1  | 1  | 1  | 0  | 0  | 0  | 0  | 0   | 0   | 0   | 4   | 2   | 3   | 1   | 1   |
| E14 | 4  | 4  | 4  | 4  | 4  | 2  | 2  | 4  | 3  | 1   | 3   | 4   | 2   | 0   | 0   | 4   | 4   |
| E15 | 4  | 3  | 3  | 4  | 3  | 3  | 2  | 1  | 2  | 3   | 2   | 1   | 3   | 0   | 0   | 3   | 2   |
| E16 | 0  | 0  | 0  | 0  | 0  | 2  | 2  | 2  | 2  | 2   | 2   | 2   | 1   | 0   | 0   | 0   | 0   |
| E17 | 0  | 0  | 0  | 0  | 0  | 1  | 1  | 1  | 1  | 1   | 1   | 1   | 2   | 0   | 0   | 0   | 0   |



Table S155. Case 40. Weighted Supermatrix and Priorities, according to procedure 1.

|     | E1    | E2    | E3    | E4    | E5    | E6    | E7    | E8    | E9    | E10   | E11   | E12   | E13   | E14   | E15   | E16   | E17   | Priorities |
|-----|-------|-------|-------|-------|-------|-------|-------|-------|-------|-------|-------|-------|-------|-------|-------|-------|-------|------------|
| E1  | 0.000 | 0.000 | 0.000 | 0.000 | 0.000 | 0.000 | 0.048 | 0.045 | 0.043 | 0.049 | 0.043 | 0.045 | 0.041 | 0.000 | 0.000 | 0.000 | 0.000 | 0.018      |
| E2  | 0.000 | 0.000 | 0.000 | 0.000 | 0.000 | 0.044 | 0.048 | 0.045 | 0.043 | 0.049 | 0.043 | 0.045 | 0.041 | 0.000 | 0.000 | 0.000 | 0.000 | 0.026      |
| E3  | 0.000 | 0.000 | 0.000 | 0.000 | 0.000 | 0.000 | 0.000 | 0.000 | 0.000 | 0.000 | 0.000 | 0.000 | 0.000 | 0.000 | 0.000 | 0.000 | 0.000 | 0.000      |
| E4  | 0.000 | 0.000 | 0.000 | 0.000 | 0.000 | 0.000 | 0.000 | 0.000 | 0.000 | 0.000 | 0.000 | 0.000 | 0.000 | 0.000 | 0.000 | 0.000 | 0.000 | 0.000      |
| E5  | 0.000 | 0.000 | 0.000 | 0.000 | 0.000 | 0.000 | 0.000 | 0.000 | 0.000 | 0.000 | 0.000 | 0.000 | 0.041 | 0.000 | 0.000 | 0.000 | 0.000 | 0.002      |
| E6  | 0.156 | 0.106 | 0.105 | 0.110 | 0.106 | 0.463 | 0.000 | 0.000 | 0.000 | 0.000 | 0.000 | 0.000 | 0.000 | 0.318 | 0.279 | 0.054 | 0.067 | 0.178      |
| E7  | 0.069 | 0.106 | 0.105 | 0.043 | 0.106 | 0.000 | 0.476 | 0.000 | 0.000 | 0.000 | 0.000 | 0.000 | 0.000 | 0.318 | 0.279 | 0.054 | 0.067 | 0.179      |
| E8  | 0.000 | 0.000 | 0.000 | 0.000 | 0.000 | 0.000 | 0.000 | 0.355 | 0.000 | 0.000 | 0.000 | 0.000 | 0.000 | 0.000 | 0.041 | 0.000 | 0.000 | 0.008      |
| E9  | 0.000 | 0.043 | 0.000 | 0.043 | 0.043 | 0.000 | 0.000 | 0.000 | 0.430 | 0.000 | 0.000 | 0.000 | 0.000 | 0.129 | 0.101 | 0.054 | 0.000 | 0.065      |
| E10 | 0.000 | 0.000 | 0.000 | 0.000 | 0.000 | 0.000 | 0.000 | 0.000 | 0.000 | 0.440 | 0.000 | 0.000 | 0.000 | 0.000 | 0.000 | 0.000 | 0.000 | 0.000      |
| E11 | 0.000 | 0.000 | 0.000 | 0.043 | 0.000 | 0.000 | 0.000 | 0.000 | 0.000 | 0.000 | 0.430 | 0.000 | 0.000 | 0.052 | 0.101 | 0.054 | 0.000 | 0.042      |
| E12 | 0.069 | 0.043 | 0.044 | 0.043 | 0.043 | 0.000 | 0.000 | 0.000 | 0.000 | 0.000 | 0.000 | 0.355 | 0.000 | 0.129 | 0.101 | 0.054 | 0.067 | 0.063      |
| E13 | 0.034 | 0.043 | 0.044 | 0.043 | 0.043 | 0.000 | 0.000 | 0.000 | 0.000 | 0.000 | 0.000 | 0.000 | 0.402 | 0.052 | 0.101 | 0.054 | 0.067 | 0.046      |
| E14 | 0.336 | 0.430 | 0.463 | 0.337 | 0.430 | 0.105 | 0.127 | 0.355 | 0.230 | 0.049 | 0.230 | 0.355 | 0.105 | 0.000 | 0.000 | 0.427 | 0.550 | 0.157      |
| E15 | 0.336 | 0.230 | 0.238 | 0.337 | 0.230 | 0.238 | 0.127 | 0.045 | 0.106 | 0.242 | 0.106 | 0.045 | 0.222 | 0.000 | 0.000 | 0.249 | 0.181 | 0.123      |
| E16 | 0.000 | 0.000 | 0.000 | 0.000 | 0.000 | 0.105 | 0.127 | 0.111 | 0.106 | 0.123 | 0.106 | 0.111 | 0.041 | 0.000 | 0.000 | 0.000 | 0.000 | 0.063      |
| E17 | 0.000 | 0.000 | 0.000 | 0.000 | 0.000 | 0.044 | 0.048 | 0.045 | 0.043 | 0.049 | 0.043 | 0.045 | 0.105 | 0.000 | 0.000 | 0.000 | 0.000 | 0.029      |

Table S156. Case 40. Weighted Supermatrix and Priorities, according to procedure 2.

|     | E1    | E2    | E3    | E4    | E5    | E6    | E7    | E8    | E9    | E10   | E11   | E12   | E13   | E14   | E15   | E16   | E17   | Priorities |
|-----|-------|-------|-------|-------|-------|-------|-------|-------|-------|-------|-------|-------|-------|-------|-------|-------|-------|------------|
| E1  | 0.018 | 0.020 | 0.021 | 0.019 | 0.020 | 0.021 | 0.055 | 0.052 | 0.051 | 0.055 | 0.051 | 0.052 | 0.048 | 0.017 | 0.015 | 0.021 | 0.025 | 0.033      |
| E2  | 0.018 | 0.020 | 0.021 | 0.019 | 0.020 | 0.055 | 0.055 | 0.052 | 0.051 | 0.055 | 0.051 | 0.052 | 0.048 | 0.017 | 0.015 | 0.021 | 0.025 | 0.036      |
| E3  | 0.018 | 0.020 | 0.021 | 0.019 | 0.020 | 0.021 | 0.021 | 0.020 | 0.020 | 0.021 | 0.020 | 0.020 | 0.019 | 0.017 | 0.015 | 0.021 | 0.025 | 0.019      |
| E4  | 0.018 | 0.020 | 0.021 | 0.019 | 0.020 | 0.021 | 0.021 | 0.020 | 0.020 | 0.021 | 0.020 | 0.020 | 0.019 | 0.017 | 0.015 | 0.021 | 0.025 | 0.019      |
| E5  | 0.018 | 0.020 | 0.021 | 0.019 | 0.020 | 0.021 | 0.021 | 0.020 | 0.020 | 0.021 | 0.020 | 0.020 | 0.048 | 0.017 | 0.015 | 0.021 | 0.025 | 0.021      |
| E6  | 0.140 | 0.102 | 0.105 | 0.102 | 0.102 | 0.272 | 0.021 | 0.020 | 0.020 | 0.021 | 0.020 | 0.020 | 0.019 | 0.207 | 0.189 | 0.057 | 0.069 | 0.109      |
| E7  | 0.084 | 0.102 | 0.105 | 0.049 | 0.102 | 0.021 | 0.289 | 0.020 | 0.020 | 0.021 | 0.020 | 0.020 | 0.019 | 0.207 | 0.189 | 0.057 | 0.069 | 0.107      |
| E8  | 0.018 | 0.020 | 0.021 | 0.019 | 0.020 | 0.021 | 0.021 | 0.245 | 0.020 | 0.021 | 0.020 | 0.020 | 0.019 | 0.017 | 0.060 | 0.021 | 0.025 | 0.031      |
| E9  | 0.018 | 0.051 | 0.021 | 0.049 | 0.051 | 0.021 | 0.021 | 0.020 | 0.269 | 0.021 | 0.020 | 0.020 | 0.019 | 0.124 | 0.103 | 0.057 | 0.025 | 0.065      |
| E10 | 0.018 | 0.020 | 0.021 | 0.019 | 0.020 | 0.021 | 0.021 | 0.020 | 0.020 | 0.277 | 0.020 | 0.020 | 0.019 | 0.017 | 0.015 | 0.021 | 0.025 | 0.026      |
| E11 | 0.018 | 0.020 | 0.021 | 0.049 | 0.020 | 0.021 | 0.021 | 0.020 | 0.020 | 0.021 | 0.269 | 0.020 | 0.019 | 0.073 | 0.103 | 0.057 | 0.025 | 0.053      |
| E12 | 0.084 | 0.051 | 0.055 | 0.049 | 0.051 | 0.021 | 0.021 | 0.020 | 0.020 | 0.021 | 0.020 | 0.245 | 0.019 | 0.124 | 0.103 | 0.057 | 0.069 | 0.069      |
| E13 | 0.046 | 0.051 | 0.055 | 0.049 | 0.051 | 0.021 | 0.021 | 0.020 | 0.020 | 0.021 | 0.020 | 0.020 | 0.267 | 0.073 | 0.103 | 0.057 | 0.069 | 0.060      |
| E14 | 0.221 | 0.269 | 0.272 | 0.243 | 0.269 | 0.105 | 0.112 | 0.245 | 0.175 | 0.055 | 0.175 | 0.245 | 0.099 | 0.017 | 0.015 | 0.284 | 0.313 | 0.142      |
| E15 | 0.221 | 0.175 | 0.177 | 0.243 | 0.175 | 0.177 | 0.112 | 0.052 | 0.102 | 0.183 | 0.102 | 0.052 | 0.172 | 0.017 | 0.015 | 0.190 | 0.139 | 0.110      |
| E16 | 0.018 | 0.020 | 0.021 | 0.019 | 0.020 | 0.105 | 0.112 | 0.105 | 0.102 | 0.111 | 0.102 | 0.105 | 0.048 | 0.017 | 0.015 | 0.021 | 0.025 | 0.060      |
| E17 | 0.018 | 0.020 | 0.021 | 0.019 | 0.020 | 0.055 | 0.055 | 0.052 | 0.051 | 0.055 | 0.051 | 0.052 | 0.099 | 0.017 | 0.015 | 0.021 | 0.025 | 0.039      |

Table S157. Case 41. Original Weighted Supermatrix and Priorities.

|    | E1    | E2    | E3    | E4    | E5    | E6    | E7    | Priorities |
|----|-------|-------|-------|-------|-------|-------|-------|------------|
| E1 | 0.000 | 0.083 | 0.021 | 0.028 | 0.000 | 0.000 | 0.084 | 0.023      |
| E2 | 0.167 | 0.000 | 0.146 | 0.139 | 0.000 | 0.000 | 0.410 | 0.082      |
| E3 | 0.000 | 0.000 | 0.000 | 0.000 | 0.000 | 0.000 | 0.077 | 0.012      |
| E4 | 0.000 | 0.083 | 0.000 | 0.000 | 0.000 | 0.000 | 0.429 | 0.076      |
| E5 | 0.694 | 0.694 | 0.417 | 0.139 | 0.000 | 0.750 | 0.000 | 0.327      |
| E6 | 0.139 | 0.139 | 0.417 | 0.694 | 0.750 | 0.000 | 0.000 | 0.318      |
| E7 | 0.000 | 0.000 | 0.000 | 0.000 | 0.250 | 0.250 | 0.000 | 0.161      |

Table S158. Case 41's X Influence Matrix.

|    | E1 | E2 | E3 | E4 | E5 | E6 | E7 |
|----|----|----|----|----|----|----|----|
| E1 | 0  | 0  | 0  | 0  | 0  | 0  | 0  |
| E2 | 1  | 0  | 1  | 1  | 0  | 0  | 4  |
| E3 | 0  | 0  | 0  | 0  | 0  | 0  | 0  |
| E4 | 0  | 0  | 0  | 0  | 0  | 0  | 4  |
| E5 | 4  | 4  | 4  | 1  | 0  | 4  | 0  |
| E6 | 1  | 1  | 4  | 4  | 4  | 0  | 0  |
| E7 | 0  | 0  | 0  | 0  | 1  | 1  | 0  |

Table S159. Case 41. Weighted Supermatrix and Priorities, according to procedure 1.

|    | E1    | E2    | E3    | E4    | E5    | E6    | E7    | Priorities |
|----|-------|-------|-------|-------|-------|-------|-------|------------|
| E1 | 0.000 | 0.000 | 0.000 | 0.000 | 0.000 | 0.000 | 0.000 | 0.000      |
| E2 | 0.111 | 0.000 | 0.067 | 0.111 | 0.000 | 0.000 | 0.500 | 0.055      |
| E3 | 0.000 | 0.000 | 0.000 | 0.000 | 0.000 | 0.000 | 0.000 | 0.000      |
| E4 | 0.000 | 0.000 | 0.000 | 0.000 | 0.000 | 0.000 | 0.500 | 0.050      |
| E5 | 0.778 | 0.875 | 0.467 | 0.111 | 0.000 | 0.875 | 0.000 | 0.400      |
| E6 | 0.111 | 0.125 | 0.467 | 0.778 | 0.875 | 0.000 | 0.000 | 0.396      |
| E7 | 0.000 | 0.000 | 0.000 | 0.000 | 0.125 | 0.125 | 0.000 | 0.099      |

Table S160. Case 41. Weighted Supermatrix and Priorities, according to procedure 2.

|    | E1    | E2    | E3    | E4    | E5    | E6    | E7    | Priorities |
|----|-------|-------|-------|-------|-------|-------|-------|------------|
| E1 | 0.047 | 0.055 | 0.037 | 0.047 | 0.055 | 0.055 | 0.043 | 0.052      |
| E2 | 0.125 | 0.055 | 0.090 | 0.125 | 0.055 | 0.055 | 0.391 | 0.103      |
| E3 | 0.047 | 0.055 | 0.037 | 0.047 | 0.055 | 0.055 | 0.043 | 0.052      |
| E4 | 0.047 | 0.055 | 0.037 | 0.047 | 0.055 | 0.055 | 0.391 | 0.089      |
| E5 | 0.562 | 0.577 | 0.381 | 0.125 | 0.055 | 0.577 | 0.043 | 0.308      |
| E6 | 0.125 | 0.149 | 0.381 | 0.562 | 0.577 | 0.055 | 0.043 | 0.290      |
| E7 | 0.047 | 0.055 | 0.037 | 0.047 | 0.149 | 0.149 | 0.043 | 0.108      |

|     | E1    | E2    | E3    | E4    | E5    | E6    | E7    | E8    | E9    | E10   | E11   | E12   | E13   | E14   | E15   | E16   | Priorities |
|-----|-------|-------|-------|-------|-------|-------|-------|-------|-------|-------|-------|-------|-------|-------|-------|-------|------------|
| E1  | 0.000 | 0.000 | 0.000 | 0.000 | 0.000 | 0.000 | 0.000 | 0.000 | 0.000 | 0.000 | 0.000 | 0.000 | 0.000 | 0.433 | 0.358 | 0.355 | 0.138      |
| E2  | 0.127 | 0.000 | 0.000 | 0.000 | 0.000 | 0.000 | 0.000 | 0.000 | 0.000 | 0.000 | 0.000 | 0.000 | 0.000 | 0.000 | 0.000 | 0.000 | 0.018      |
| E3  | 0.125 | 0.000 | 0.000 | 0.000 | 0.000 | 0.000 | 0.000 | 0.000 | 0.000 | 0.000 | 0.000 | 0.000 | 0.000 | 0.000 | 0.075 | 0.078 | 0.030      |
| E4  | 0.284 | 0.000 | 0.000 | 0.000 | 0.000 | 0.000 | 0.000 | 0.000 | 0.000 | 0.000 | 0.000 | 0.000 | 0.000 | 0.000 | 0.000 | 0.000 | 0.039      |
| E5  | 0.007 | 0.000 | 0.000 | 0.124 | 0.000 | 0.460 | 0.325 | 0.024 | 0.015 | 0.013 | 0.014 | 0.017 | 0.015 | 0.013 | 0.004 | 0.004 | 0.044      |
| E6  | 0.007 | 0.000 | 0.000 | 0.198 | 0.323 | 0.000 | 0.348 | 0.024 | 0.012 | 0.015 | 0.012 | 0.011 | 0.020 | 0.010 | 0.006 | 0.011 | 0.042      |
| E7  | 0.018 | 0.545 | 0.053 | 0.318 | 0.000 | 0.000 | 0.000 | 0.011 | 0.007 | 0.006 | 0.004 | 0.007 | 0.010 | 0.003 | 0.011 | 0.008 | 0.031      |
| E8  | 0.015 | 0.454 | 0.048 | 0.360 | 0.677 | 0.540 | 0.327 | 0.000 | 0.007 | 0.007 | 0.011 | 0.006 | 0.009 | 0.004 | 0.010 | 0.007 | 0.092      |
| E9  | 0.000 | 0.000 | 0.000 | 0.000 | 0.000 | 0.000 | 0.000 | 0.243 | 0.000 | 0.255 | 0.256 | 0.241 | 0.000 | 0.000 | 0.000 | 0.000 | 0.047      |
| E10 | 0.000 | 0.000 | 0.000 | 0.000 | 0.000 | 0.000 | 0.000 | 0.290 | 0.177 | 0.000 | 0.094 | 0.088 | 0.000 | 0.000 | 0.000 | 0.000 | 0.040      |
| E11 | 0.000 | 0.000 | 0.000 | 0.000 | 0.000 | 0.000 | 0.000 | 0.201 | 0.125 | 0.089 | 0.000 | 0.075 | 0.000 | 0.000 | 0.000 | 0.000 | 0.029      |
| E12 | 0.000 | 0.000 | 0.000 | 0.000 | 0.000 | 0.000 | 0.000 | 0.207 | 0.102 | 0.060 | 0.054 | 0.000 | 0.000 | 0.000 | 0.000 | 0.000 | 0.028      |
| E13 | 0.207 | 0.000 | 0.438 | 0.000 | 0.000 | 0.000 | 0.000 | 0.000 | 0.000 | 0.000 | 0.000 | 0.000 | 0.000 | 0.102 | 0.105 | 0.028 | 0.074      |
| E14 | 0.210 | 0.000 | 0.461 | 0.000 | 0.000 | 0.000 | 0.000 | 0.000 | 0.555 | 0.555 | 0.555 | 0.555 | 0.164 | 0.000 | 0.247 | 0.140 | 0.173      |
| E15 | 0.000 | 0.000 | 0.000 | 0.000 | 0.000 | 0.000 | 0.000 | 0.000 | 0.000 | 0.000 | 0.000 | 0.000 | 0.680 | 0.269 | 0.000 | 0.369 | 0.117      |
| E16 | 0.000 | 0.000 | 0.000 | 0.000 | 0.000 | 0.000 | 0.000 | 0.000 | 0.000 | 0.000 | 0.000 | 0.000 | 0.102 | 0.166 | 0.184 | 0.000 | 0.058      |

[illegible]

Table S163. Case 42. Weighted Supermatrix and Priorities, according to procedure 1.

|     | E1    | E2    | E3    | E4    | E5    | E6    | E7    | E8    | E9    | E10   | E11   | E12   | E13   | E14   | E15   | E16   | Priorities |
|-----|-------|-------|-------|-------|-------|-------|-------|-------|-------|-------|-------|-------|-------|-------|-------|-------|------------|
| E1  | 0.000 | 0.000 | 0.000 | 0.000 | 0.000 | 0.000 | 0.000 | 0.000 | 0.000 | 0.000 | 0.000 | 0.000 | 0.000 | 0.583 | 0.514 | 0.438 | 0.178      |
| E2  | 0.073 | 0.000 | 0.000 | 0.000 | 0.000 | 0.000 | 0.000 | 0.000 | 0.000 | 0.000 | 0.000 | 0.000 | 0.000 | 0.000 | 0.000 | 0.000 | 0.013      |
| E3  | 0.073 | 0.000 | 0.000 | 0.000 | 0.000 | 0.000 | 0.000 | 0.000 | 0.000 | 0.000 | 0.000 | 0.000 | 0.000 | 0.000 | 0.053 | 0.063 | 0.021      |
| E4  | 0.466 | 0.000 | 0.000 | 0.000 | 0.000 | 0.000 | 0.000 | 0.000 | 0.000 | 0.000 | 0.000 | 0.000 | 0.000 | 0.000 | 0.000 | 0.000 | 0.083      |
| E5  | 0.000 | 0.000 | 0.000 | 0.051 | 0.000 | 0.500 | 0.333 | 0.000 | 0.000 | 0.000 | 0.000 | 0.000 | 0.000 | 0.000 | 0.000 | 0.000 | 0.032      |
| E6  | 0.000 | 0.000 | 0.000 | 0.104 | 0.167 | 0.000 | 0.333 | 0.000 | 0.000 | 0.000 | 0.000 | 0.000 | 0.000 | 0.000 | 0.000 | 0.000 | 0.028      |
| E7  | 0.000 | 0.500 | 0.000 | 0.423 | 0.000 | 0.000 | 0.000 | 0.000 | 0.000 | 0.000 | 0.000 | 0.000 | 0.000 | 0.000 | 0.000 | 0.000 | 0.042      |
| E8  | 0.000 | 0.500 | 0.000 | 0.423 | 0.833 | 0.500 | 0.333 | 0.000 | 0.000 | 0.000 | 0.000 | 0.000 | 0.000 | 0.000 | 0.000 | 0.000 | 0.096      |
| E9  | 0.000 | 0.000 | 0.000 | 0.000 | 0.000 | 0.000 | 0.000 | 0.375 | 0.000 | 0.167 | 0.167 | 0.167 | 0.000 | 0.000 | 0.000 | 0.000 | 0.048      |
| E10 | 0.000 | 0.000 | 0.000 | 0.000 | 0.000 | 0.000 | 0.000 | 0.375 | 0.111 | 0.000 | 0.000 | 0.000 | 0.000 | 0.000 | 0.000 | 0.000 | 0.041      |
| E11 | 0.000 | 0.000 | 0.000 | 0.000 | 0.000 | 0.000 | 0.000 | 0.125 | 0.111 | 0.000 | 0.000 | 0.000 | 0.000 | 0.000 | 0.000 | 0.000 | 0.017      |
| E12 | 0.000 | 0.000 | 0.000 | 0.000 | 0.000 | 0.000 | 0.000 | 0.125 | 0.000 | 0.000 | 0.000 | 0.000 | 0.000 | 0.000 | 0.000 | 0.000 | 0.012      |
| E13 | 0.194 | 0.000 | 0.500 | 0.000 | 0.000 | 0.000 | 0.000 | 0.000 | 0.000 | 0.000 | 0.000 | 0.000 | 0.000 | 0.067 | 0.053 | 0.000 | 0.063      |
| E14 | 0.194 | 0.000 | 0.500 | 0.000 | 0.000 | 0.000 | 0.000 | 0.000 | 0.778 | 0.833 | 0.833 | 0.833 | 0.125 | 0.000 | 0.258 | 0.063 | 0.181      |
| E15 | 0.000 | 0.000 | 0.000 | 0.000 | 0.000 | 0.000 | 0.000 | 0.000 | 0.000 | 0.000 | 0.000 | 0.000 | 0.875 | 0.282 | 0.000 | 0.438 | 0.118      |
| E16 | 0.000 | 0.000 | 0.000 | 0.000 | 0.000 | 0.000 | 0.000 | 0.000 | 0.000 | 0.000 | 0.000 | 0.000 | 0.000 | 0.067 | 0.122 | 0.000 | 0.027      |

Table S164. Case 42. Weighted Supermatrix and Priorities, according to procedure 2.

|     | E1    | E2    | E3    | E4    | E5    | E6    | E7    | E8    | E9    | E10   | E11   | E12   | E13   | E14   | E15   | E16   | Priorities |
|-----|-------|-------|-------|-------|-------|-------|-------|-------|-------|-------|-------|-------|-------|-------|-------|-------|------------|
| E1  | 0.021 | 0.031 | 0.031 | 0.025 | 0.035 | 0.031 | 0.025 | 0.022 | 0.034 | 0.035 | 0.035 | 0.035 | 0.038 | 0.308 | 0.293 | 0.271 | 0.100      |
| E2  | 0.093 | 0.031 | 0.031 | 0.025 | 0.035 | 0.031 | 0.025 | 0.022 | 0.034 | 0.035 | 0.035 | 0.035 | 0.038 | 0.028 | 0.024 | 0.026 | 0.036      |
| E3  | 0.093 | 0.031 | 0.031 | 0.025 | 0.035 | 0.031 | 0.025 | 0.022 | 0.034 | 0.035 | 0.035 | 0.035 | 0.038 | 0.028 | 0.064 | 0.072 | 0.041      |
| E4  | 0.261 | 0.031 | 0.031 | 0.025 | 0.035 | 0.031 | 0.025 | 0.022 | 0.034 | 0.035 | 0.035 | 0.035 | 0.038 | 0.028 | 0.024 | 0.026 | 0.053      |
| E5  | 0.021 | 0.031 | 0.031 | 0.066 | 0.035 | 0.281 | 0.225 | 0.022 | 0.034 | 0.035 | 0.035 | 0.035 | 0.038 | 0.028 | 0.024 | 0.026 | 0.054      |
| E6  | 0.021 | 0.031 | 0.031 | 0.117 | 0.166 | 0.031 | 0.225 | 0.022 | 0.034 | 0.035 | 0.035 | 0.035 | 0.038 | 0.028 | 0.024 | 0.026 | 0.051      |
| E7  | 0.021 | 0.281 | 0.031 | 0.261 | 0.035 | 0.031 | 0.025 | 0.022 | 0.034 | 0.035 | 0.035 | 0.035 | 0.038 | 0.028 | 0.024 | 0.026 | 0.050      |
| E8  | 0.021 | 0.281 | 0.031 | 0.261 | 0.346 | 0.281 | 0.225 | 0.022 | 0.034 | 0.035 | 0.035 | 0.035 | 0.038 | 0.028 | 0.024 | 0.026 | 0.089      |
| E9  | 0.021 | 0.031 | 0.031 | 0.025 | 0.035 | 0.031 | 0.025 | 0.227 | 0.034 | 0.166 | 0.166 | 0.166 | 0.038 | 0.028 | 0.024 | 0.026 | 0.065      |
| E10 | 0.021 | 0.031 | 0.031 | 0.025 | 0.035 | 0.031 | 0.025 | 0.227 | 0.099 | 0.035 | 0.035 | 0.035 | 0.038 | 0.028 | 0.024 | 0.026 | 0.051      |
| E11 | 0.021 | 0.031 | 0.031 | 0.025 | 0.035 | 0.031 | 0.025 | 0.141 | 0.099 | 0.035 | 0.035 | 0.035 | 0.038 | 0.028 | 0.024 | 0.026 | 0.043      |
| E12 | 0.021 | 0.031 | 0.031 | 0.025 | 0.035 | 0.031 | 0.025 | 0.141 | 0.034 | 0.035 | 0.035 | 0.035 | 0.038 | 0.028 | 0.024 | 0.026 | 0.039      |
| E13 | 0.160 | 0.031 | 0.281 | 0.025 | 0.035 | 0.031 | 0.025 | 0.022 | 0.034 | 0.035 | 0.035 | 0.035 | 0.038 | 0.076 | 0.064 | 0.026 | 0.063      |
| E14 | 0.160 | 0.031 | 0.281 | 0.025 | 0.035 | 0.031 | 0.025 | 0.022 | 0.357 | 0.346 | 0.346 | 0.346 | 0.108 | 0.028 | 0.194 | 0.072 | 0.136      |
| E15 | 0.021 | 0.031 | 0.031 | 0.025 | 0.035 | 0.031 | 0.025 | 0.022 | 0.034 | 0.035 | 0.035 | 0.035 | 0.365 | 0.209 | 0.024 | 0.271 | 0.085      |
| E16 | 0.021 | 0.031 | 0.031 | 0.025 | 0.035 | 0.031 | 0.025 | 0.022 | 0.034 | 0.035 | 0.035 | 0.035 | 0.038 | 0.076 | 0.120 | 0.026 | 0.043      |

Table S165. Case 43. Original Weighted Supermatrix and Priorities.

|     | E1    | E2    | E3    | E4    | E5    | E6    | E7    | E8    | E9    | E10   | E11   | E12   | Priorities |
|-----|-------|-------|-------|-------|-------|-------|-------|-------|-------|-------|-------|-------|------------|
| E1  | 0.776 | 0.000 | 0.000 | 0.000 | 0.224 | 0.107 | 0.014 | 0.039 | 0.000 | 0.000 | 0.000 | 0.000 | 0.122      |
| E2  | 0.000 | 0.701 | 0.000 | 0.000 | 0.033 | 0.107 | 0.060 | 0.012 | 0.034 | 0.034 | 0.000 | 0.000 | 0.080      |
| E3  | 0.000 | 0.000 | 0.750 | 0.000 | 0.086 | 0.107 | 0.000 | 0.019 | 0.006 | 0.007 | 0.000 | 0.000 | 0.078      |
| E4  | 0.000 | 0.000 | 0.250 | 0.776 | 0.086 | 0.107 | 0.017 | 0.096 | 0.014 | 0.007 | 0.000 | 0.000 | 0.194      |
| E5  | 0.000 | 0.000 | 0.000 | 0.000 | 0.321 | 0.107 | 0.000 | 0.000 | 0.033 | 0.029 | 0.041 | 0.122 | 0.042      |
| E6  | 0.000 | 0.097 | 0.000 | 0.000 | 0.107 | 0.321 | 0.455 | 0.000 | 0.230 | 0.204 | 0.204 | 0.122 | 0.142      |
| E7  | 0.000 | 0.000 | 0.000 | 0.000 | 0.000 | 0.000 | 0.000 | 0.000 | 0.342 | 0.455 | 0.477 | 0.530 | 0.101      |
| E8  | 0.000 | 0.000 | 0.000 | 0.000 | 0.000 | 0.000 | 0.000 | 0.000 | 0.342 | 0.152 | 0.159 | 0.106 | 0.032      |
| E9  | 0.017 | 0.025 | 0.000 | 0.000 | 0.071 | 0.000 | 0.000 | 0.000 | 0.000 | 0.113 | 0.000 | 0.000 | 0.009      |
| E10 | 0.093 | 0.076 | 0.000 | 0.000 | 0.071 | 0.000 | 0.000 | 0.000 | 0.000 | 0.000 | 0.000 | 0.000 | 0.020      |
| E11 | 0.091 | 0.076 | 0.000 | 0.187 | 0.000 | 0.071 | 0.227 | 0.417 | 0.000 | 0.000 | 0.119 | 0.119 | 0.121      |
| E12 | 0.022 | 0.025 | 0.000 | 0.037 | 0.000 | 0.071 | 0.227 | 0.417 | 0.000 | 0.000 | 0.000 | 0.000 | 0.058      |

Table S166. Case 43's X Influence Matrix.

|     | E1 | E2 | E3 | E4 | E5 | E6 | E7 | E8 | E9 | E10 | E11 | E12 |
|-----|----|----|----|----|----|----|----|----|----|-----|-----|-----|
| E1  | 4  | 0  | 0  | 0  | 3  | 1  | 0  | 0  | 0  | 0   | 0   | 0   |
| E2  | 0  | 4  | 0  | 0  | 0  | 1  | 0  | 0  | 0  | 0   | 0   | 0   |
| E3  | 0  | 0  | 4  | 0  | 1  | 1  | 0  | 0  | 0  | 0   | 0   | 0   |
| E4  | 0  | 0  | 1  | 4  | 1  | 1  | 0  | 1  | 0  | 0   | 0   | 0   |
| E5  | 0  | 0  | 0  | 0  | 4  | 1  | 0  | 0  | 0  | 0   | 0   | 1   |
| E6  | 0  | 0  | 0  | 0  | 1  | 4  | 4  | 0  | 3  | 2   | 2   | 1   |
| E7  | 0  | 0  | 0  | 0  | 0  | 0  | 0  | 0  | 4  | 4   | 4   | 4   |
| E8  | 0  | 0  | 0  | 0  | 0  | 0  | 0  | 0  | 4  | 1   | 1   | 1   |
| E9  | 0  | 0  | 0  | 0  | 1  | 0  | 0  | 0  | 0  | 1   | 0   | 0   |
| E10 | 0  | 0  | 0  | 0  | 1  | 0  | 0  | 0  | 0  | 0   | 0   | 0   |
| E11 | 0  | 0  | 0  | 1  | 0  | 1  | 2  | 4  | 0  | 0   | 1   | 1   |
| E12 | 0  | 0  | 0  | 0  | 0  | 1  | 2  | 4  | 0  | 0   | 0   | 0   |

Table S167. Case 43. Weighted Supermatrix and Priorities, according to procedure 1.

|     | E1    | E2    | E3    | E4    | E5    | E6    | E7    | E8    | E9    | E10   | E11   | E12   | Priorities |
|-----|-------|-------|-------|-------|-------|-------|-------|-------|-------|-------|-------|-------|------------|
| E1  | 1.000 | 0.000 | 0.000 | 0.000 | 0.259 | 0.071 | 0.000 | 0.000 | 0.000 | 0.000 | 0.000 | 0.000 | 0.612      |
| E2  | 0.000 | 1.000 | 0.000 | 0.000 | 0.000 | 0.071 | 0.000 | 0.000 | 0.000 | 0.000 | 0.000 | 0.000 | 0.388      |
| E3  | 0.000 | 0.000 | 0.875 | 0.000 | 0.057 | 0.071 | 0.000 | 0.000 | 0.000 | 0.000 | 0.000 | 0.000 | 0.000      |
| E4  | 0.000 | 0.000 | 0.125 | 0.875 | 0.057 | 0.071 | 0.000 | 0.067 | 0.000 | 0.000 | 0.000 | 0.000 | 0.000      |
| E5  | 0.000 | 0.000 | 0.000 | 0.000 | 0.456 | 0.071 | 0.000 | 0.000 | 0.000 | 0.000 | 0.000 | 0.091 | 0.000      |
| E6  | 0.000 | 0.000 | 0.000 | 0.000 | 0.057 | 0.500 | 0.714 | 0.000 | 0.143 | 0.191 | 0.191 | 0.091 | 0.000      |
| E7  | 0.000 | 0.000 | 0.000 | 0.000 | 0.000 | 0.000 | 0.000 | 0.000 | 0.429 | 0.657 | 0.657 | 0.636 | 0.000      |
| E8  | 0.000 | 0.000 | 0.000 | 0.000 | 0.000 | 0.000 | 0.000 | 0.000 | 0.429 | 0.076 | 0.076 | 0.091 | 0.000      |
| E9  | 0.000 | 0.000 | 0.000 | 0.000 | 0.057 | 0.000 | 0.000 | 0.000 | 0.000 | 0.076 | 0.000 | 0.000 | 0.000      |
| E10 | 0.000 | 0.000 | 0.000 | 0.000 | 0.057 | 0.000 | 0.000 | 0.000 | 0.000 | 0.000 | 0.000 | 0.000 | 0.000      |
| E11 | 0.000 | 0.000 | 0.000 | 0.125 | 0.000 | 0.071 | 0.143 | 0.467 | 0.000 | 0.000 | 0.076 | 0.091 | 0.000      |
| E12 | 0.000 | 0.000 | 0.000 | 0.000 | 0.000 | 0.071 | 0.143 | 0.467 | 0.000 | 0.000 | 0.000 | 0.000 | 0.000      |

Table S168. Case 43. Weighted Supermatrix and Priorities, according to procedure 2.

|     | E1    | E2    | E3    | E4    | E5    | E6    | E7    | E8    | E9    | E10   | E11   | E12   | Priorities |
|-----|-------|-------|-------|-------|-------|-------|-------|-------|-------|-------|-------|-------|------------|
| E1  | 0.450 | 0.050 | 0.044 | 0.044 | 0.222 | 0.071 | 0.034 | 0.032 | 0.029 | 0.032 | 0.032 | 0.032 | 0.096      |
| E2  | 0.050 | 0.450 | 0.044 | 0.044 | 0.024 | 0.071 | 0.034 | 0.032 | 0.029 | 0.032 | 0.032 | 0.032 | 0.072      |
| E3  | 0.050 | 0.050 | 0.436 | 0.044 | 0.062 | 0.071 | 0.034 | 0.032 | 0.029 | 0.032 | 0.032 | 0.032 | 0.076      |
| E4  | 0.050 | 0.050 | 0.125 | 0.436 | 0.062 | 0.071 | 0.034 | 0.085 | 0.029 | 0.032 | 0.032 | 0.032 | 0.091      |
| E5  | 0.050 | 0.050 | 0.044 | 0.044 | 0.347 | 0.071 | 0.034 | 0.032 | 0.029 | 0.032 | 0.032 | 0.091 | 0.071      |
| E6  | 0.050 | 0.050 | 0.044 | 0.044 | 0.062 | 0.397 | 0.385 | 0.032 | 0.179 | 0.170 | 0.170 | 0.091 | 0.173      |
| E7  | 0.050 | 0.050 | 0.044 | 0.044 | 0.024 | 0.026 | 0.034 | 0.032 | 0.282 | 0.395 | 0.395 | 0.411 | 0.121      |
| E8  | 0.050 | 0.050 | 0.044 | 0.044 | 0.024 | 0.026 | 0.034 | 0.032 | 0.282 | 0.088 | 0.088 | 0.091 | 0.057      |
| E9  | 0.050 | 0.050 | 0.044 | 0.044 | 0.062 | 0.026 | 0.034 | 0.032 | 0.029 | 0.088 | 0.032 | 0.032 | 0.040      |
| E10 | 0.050 | 0.050 | 0.044 | 0.044 | 0.062 | 0.026 | 0.034 | 0.032 | 0.029 | 0.032 | 0.032 | 0.032 | 0.038      |
| E11 | 0.050 | 0.050 | 0.044 | 0.125 | 0.024 | 0.071 | 0.157 | 0.314 | 0.029 | 0.032 | 0.088 | 0.091 | 0.091      |
| E12 | 0.050 | 0.050 | 0.044 | 0.044 | 0.024 | 0.071 | 0.157 | 0.314 | 0.029 | 0.032 | 0.032 | 0.032 | 0.074      |

Table S169. Case 44. Original Weighted Supermatrix and Priorities.

|    | E1    | E2    | E3    | E4    | E5    | E6    | E7    | Priorities |
|----|-------|-------|-------|-------|-------|-------|-------|------------|
| E1 | 0.833 | 0.000 | 0.000 | 0.000 | 0.131 | 0.153 | 0.013 | 0.309      |
| E2 | 0.000 | 0.833 | 0.000 | 0.000 | 0.039 | 0.022 | 0.026 | 0.083      |
| E3 | 0.000 | 0.000 | 0.625 | 0.208 | 0.052 | 0.052 | 0.106 | 0.113      |
| E4 | 0.000 | 0.000 | 0.208 | 0.625 | 0.027 | 0.022 | 0.106 | 0.095      |
| E5 | 0.167 | 0.042 | 0.000 | 0.000 | 0.548 | 0.656 | 0.375 | 0.280      |
| E6 | 0.000 | 0.125 | 0.167 | 0.167 | 0.141 | 0.000 | 0.375 | 0.094      |
| E7 | 0.000 | 0.000 | 0.000 | 0.000 | 0.061 | 0.094 | 0.000 | 0.026      |

Table S170. Case 44's X Influence Matrix.

|    | E1 | E2 | E3 | E4 | E5 | E6 | E7 |
|----|----|----|----|----|----|----|----|
| E1 | 4  | 0  | 0  | 0  | 1  | 1  | 0  |
| E2 | 0  | 4  | 0  | 0  | 0  | 0  | 0  |
| E3 | 0  | 0  | 4  | 1  | 0  | 0  | 1  |
| E4 | 0  | 0  | 1  | 4  | 0  | 0  | 1  |
| E5 | 1  | 0  | 0  | 0  | 4  | 4  | 4  |
| E6 | 0  | 0  | 1  | 1  | 1  | 0  | 4  |
| E7 | 0  | 0  | 0  | 0  | 0  | 0  | 0  |

Table S171. Case 44. Weighted Supermatrix and Priorities, according to procedure 1.

|    | E1    | E2    | E3    | E4    | E5    | E6    | E7    | Priorities |
|----|-------|-------|-------|-------|-------|-------|-------|------------|
| E1 | 0.875 | 0.000 | 0.000 | 0.000 | 0.111 | 0.125 | 0.000 | 0.406      |
| E2 | 0.000 | 1.000 | 0.000 | 0.000 | 0.000 | 0.000 | 0.000 | 0.143      |
| E3 | 0.000 | 0.000 | 0.778 | 0.111 | 0.000 | 0.000 | 0.063 | 0.000      |
| E4 | 0.000 | 0.000 | 0.111 | 0.778 | 0.000 | 0.000 | 0.063 | 0.000      |
| E5 | 0.125 | 0.000 | 0.000 | 0.000 | 0.778 | 0.875 | 0.438 | 0.406      |
| E6 | 0.000 | 0.000 | 0.111 | 0.111 | 0.111 | 0.000 | 0.438 | 0.045      |
| E7 | 0.000 | 0.000 | 0.000 | 0.000 | 0.000 | 0.000 | 0.000 | 0.000      |

Table S172. Case 44. Weighted Supermatrix and Priorities, according to procedure 2.

|    | E1    | E2    | E3    | E4    | E5    | E6    | E7    | Priorities |
|----|-------|-------|-------|-------|-------|-------|-------|------------|
| E1 | 0.577 | 0.067 | 0.047 | 0.047 | 0.125 | 0.149 | 0.032 | 0.176      |
| E2 | 0.055 | 0.600 | 0.047 | 0.047 | 0.047 | 0.055 | 0.032 | 0.108      |
| E3 | 0.055 | 0.067 | 0.562 | 0.125 | 0.047 | 0.055 | 0.077 | 0.130      |
| E4 | 0.055 | 0.067 | 0.125 | 0.562 | 0.047 | 0.055 | 0.077 | 0.130      |
| E5 | 0.149 | 0.067 | 0.047 | 0.047 | 0.562 | 0.577 | 0.375 | 0.294      |
| E6 | 0.055 | 0.067 | 0.125 | 0.125 | 0.125 | 0.055 | 0.375 | 0.111      |
| E7 | 0.055 | 0.067 | 0.047 | 0.047 | 0.047 | 0.055 | 0.032 | 0.051      |

Table S173. Case 45. Original Weighted Supermatrix and Priorities.

|    | E1    | E2    | E3    | E4    | E5    | E6    | E7    | Priorities |
|----|-------|-------|-------|-------|-------|-------|-------|------------|
| E1 | 0.584 | 0.000 | 0.000 | 0.000 | 0.163 | 0.065 | 0.061 | 0.072      |
| E2 | 0.000 | 0.584 | 0.000 | 0.000 | 0.045 | 0.065 | 0.061 | 0.037      |
| E3 | 0.000 | 0.000 | 0.750 | 0.000 | 0.380 | 0.195 | 0.184 | 0.306      |
| E4 | 0.000 | 0.000 | 0.250 | 0.584 | 0.163 | 0.195 | 0.184 | 0.304      |
| E5 | 0.281 | 0.281 | 0.000 | 0.281 | 0.000 | 0.000 | 0.059 | 0.121      |
| E6 | 0.000 | 0.135 | 0.000 | 0.113 | 0.000 | 0.000 | 0.451 | 0.077      |
| E7 | 0.135 | 0.000 | 0.000 | 0.023 | 0.250 | 0.479 | 0.000 | 0.084      |

Table S174. Case 45's X Influence Matrix.

|    | E1 | E2 | E3 | E4 | E5 | E6 | E7 |
|----|----|----|----|----|----|----|----|
| E1 | 4  | 0  | 0  | 0  | 2  | 0  | 0  |
| E2 | 0  | 4  | 0  | 0  | 0  | 0  | 0  |
| E3 | 0  | 0  | 4  | 0  | 4  | 2  | 2  |
| E4 | 0  | 0  | 1  | 4  | 2  | 2  | 2  |
| E5 | 2  | 2  | 0  | 2  | 0  | 0  | 0  |
| E6 | 0  | 1  | 0  | 0  | 0  | 0  | 4  |
| E7 | 1  | 0  | 0  | 0  | 3  | 4  | 0  |

Table S175. Case 45. Weighted Supermatrix and Priorities, according to procedure 1.

|    | E1    | E2    | E3    | E4    | E5    | E6    | E7    | Priorities |
|----|-------|-------|-------|-------|-------|-------|-------|------------|
| E1 | 0.731 | 0.000 | 0.000 | 0.000 | 0.095 | 0.000 | 0.000 | 0.026      |
| E2 | 0.000 | 0.731 | 0.000 | 0.000 | 0.000 | 0.000 | 0.000 | 0.000      |
| E3 | 0.000 | 0.000 | 0.875 | 0.000 | 0.560 | 0.143 | 0.143 | 0.414      |
| E4 | 0.000 | 0.000 | 0.125 | 0.833 | 0.095 | 0.143 | 0.143 | 0.414      |
| E5 | 0.188 | 0.188 | 0.000 | 0.167 | 0.000 | 0.000 | 0.000 | 0.074      |
| E6 | 0.000 | 0.081 | 0.000 | 0.000 | 0.000 | 0.000 | 0.714 | 0.030      |
| E7 | 0.081 | 0.000 | 0.000 | 0.000 | 0.249 | 0.714 | 0.000 | 0.042      |

Table S176. Case 45. Weighted Supermatrix and Priorities, according to procedure 2.

|    | E1    | E2    | E3    | E4    | E5    | E6    | E7    | Priorities |
|----|-------|-------|-------|-------|-------|-------|-------|------------|
| E1 | 0.525 | 0.042 | 0.055 | 0.049 | 0.118 | 0.039 | 0.039 | 0.105      |
| E2 | 0.042 | 0.525 | 0.055 | 0.049 | 0.030 | 0.039 | 0.039 | 0.087      |
| E3 | 0.042 | 0.042 | 0.577 | 0.049 | 0.434 | 0.170 | 0.170 | 0.252      |
| E4 | 0.042 | 0.042 | 0.149 | 0.538 | 0.118 | 0.170 | 0.170 | 0.213      |
| E5 | 0.203 | 0.203 | 0.055 | 0.218 | 0.030 | 0.039 | 0.039 | 0.111      |
| E6 | 0.042 | 0.104 | 0.055 | 0.049 | 0.030 | 0.039 | 0.503 | 0.108      |
| E7 | 0.104 | 0.042 | 0.055 | 0.049 | 0.238 | 0.503 | 0.039 | 0.125      |



Table S177. References of cases.

| Case    | Reference                                                                                                                                                                                                                                                                                                                          |
|---------|------------------------------------------------------------------------------------------------------------------------------------------------------------------------------------------------------------------------------------------------------------------------------------------------------------------------------------|
| Case 1  | Pastor-Ferrando, J.P.; Aragonés-Beltrán, P.; Hospitaler-Pérez, A.; García-Melón, M. An ANP- and AHP-Based Approach for Weighting Criteria in Public Works Bidding. <i>Journal of the Operational Research Society</i> 2010, 61, 905–916; doi:10.1057/jors.2010.13.                                                                 |
| Case 2  | Pastor-Ferrando, J.P.; Aragonés-Beltrán, P.; Hospitaler-Pérez, A.; García-Melón, M. An ANP- and AHP-Based Approach for Weighting Criteria in Public Works Bidding. <i>Journal of the Operational Research Society</i> 2010, 61, 905–916; doi:10.1057/jors.2010.13.                                                                 |
| Case 3  | Aragonés-Beltrán, P.; Chaparro-González, F.; Pastor-Ferrando, J.P.; Pla-Rubio, A. An AHP (Analytic Hierarchy Process)/ANP (Analytic Network Process)-Based Multi-Criteria Decision Approach for the Selection of Solar-Thermal Power Plant Investment Projects. <i>Energy</i> 2014, 66, 222–238, doi:10.1016/j.energy.2013.12.016. |
| Case 4  | Aragonés-Beltrán, P.; Poveda-Bautista, R.; Jiménez-Sáez, F. An In-Depth Analysis of a TTO's Objectives Alignment within the University Strategy: An ANP-Based Approach. <i>Journal of Engineering and Technology Management - JET-M</i> 2017, 44, 19–43, doi:10.1016/j.jengtecman.2017.03.002.                                     |
| Case 5  | Caballero-Luque, A.; Aragonés-Beltrán, P.; García-Melón, M.; Dema-Pérez, C. Analysis of the Alignment of Company Goals to Web Content Using ANP. <i>International Journal of Information Technology and Decision Making</i> 2010, 9, 419–436, doi:10.1142/S0219622010003889.                                                       |
| Case 6  | Aragonés-Beltrán, P.; Pastor-Ferrando, J.P.; García-García, F.; Pascual-Agulló, A. An Analytic Network Process Approach for Siting a Municipal Solid Waste Plant in the Metropolitan Area of Valencia (Spain). <i>Journal of Environmental Management</i> 2010, 91, 1071–1086, doi:10.1016/j.jenvman.2009.12.007.                  |
| Case 7  | Aragonés-Beltrán, P.; Chaparro-González, F.; Pastor-Ferrando, J.P.; Rodríguez-Pozo, F. An ANP-Based Approach for the Selection of Photovoltaic Solar Power Plant Investment Projects. <i>Renewable and Sustainable Energy Reviews</i> 2010, 14, 249–264, doi:10.1016/j.rser.2009.07.012.                                           |
| Case 8  | Montesinos-Valera, J.; Aragonés-Beltrán, P.; Pastor-Ferrando, J.P. Selection of Maintenance, Renewal and Improvement Projects in Rail Lines Using the Analytic Network Process. <i>Structure and Infrastructure Engineering</i> 2017, 13, 1476–1496, doi:10.1080/15732479.2017.1294189.                                            |
| Case 9  | Jharkharia, S.; Shankar, R. Selection of Logistics Service Provider: An Analytic Network Process (ANP) Approach. <i>Omega</i> 2007, 35, 274–289, doi:10.1016/j.omega.2005.06.005.                                                                                                                                                  |
| Case 10 | Meade, L.A.; Presley, A. R&D Project Selection Using ANP...the Analytic Network Process. <i>IEEE Potentials</i> 2002, 21, 22–28, doi:10.1109/45.998087.                                                                                                                                                                            |
| Case 11 | Atmaca, E.; Basar, H.B. Evaluation of Power Plants in Turkey Using Analytic Network Process (ANP). <i>Energy</i> 2012, 44, 555–563, doi:10.1016/j.energy.2012.05.046.                                                                                                                                                              |
| Case 12 | Hashemi, S.H.; Karimi, A.; Tavana, M. An Integrated Green Supplier Selection Approach with Analytic Network Process and Improved Grey Relational Analysis. <i>International Journal of Production Economics</i> 2015, 159, 178–191, doi:10.1016/j.ijpe.2014.09.027.                                                                |
| Case 13 | Milani, A.S.; Shanian, A.; Lynam, C.; Scarinci, T. An Application of the Analytic Network Process in Multiple Criteria Material Selection. <i>Materials &amp; Design</i> 2013, 44, 622–632, doi:10.1016/j.matdes.2012.07.057.                                                                                                      |
| Case 14 | Wu, W.H.; Lin, C.T.; Peng, K.H. Determination of a Hospital Management Policy Using Conjoint Analysis in the Analytic Network Process. <i>Quality and Quantity</i> 2009, 43, 145–154, doi:10.1007/s11135-007-9158-3.                                                                                                               |
| Case 15 | Lin, Y.H.; Tsai, K.M.; Shiang, W.J.; Kuo, T.C.; Tsai, C.H. Research on Using ANP to Establish a Performance Assessment Model for Business Intelligence Systems. <i>Expert Systems with Applications</i> 2009, 36, 4135–4146, doi:10.1016/j.eswa.2008.03.004.                                                                       |
| Case 16 | Aragonés-Beltrán, P.; Aznar, J.; Ferrís-Oñate, J.; García-Melón, M. Valuation of Urban Industrial Land: An                                                                                                                                                                                                                         |

| Case    | Reference                                                                                                                                                                                                                                                                                           |
|---------|-----------------------------------------------------------------------------------------------------------------------------------------------------------------------------------------------------------------------------------------------------------------------------------------------------|
|         | Analytic Network Process Approach. <i>European Journal of Operational Research</i> 2008, 185, 322–339, doi:10.1016/j.ejor.2006.09.076.                                                                                                                                                              |
| Case 17 | Perçin, S. Using the ANP Approach in Selecting and Benchmarking ERP Systems. <i>Benchmarking</i> 2008, 15, 630–649, doi:10.1108/14635770810903196.                                                                                                                                                  |
| Case 18 | Hsieh, L.F.; Lin, L.H.; Lin, Y.Y. A Service Quality Measurement Architecture for Hot Spring Hotels in Taiwan. <i>Tourism Management</i> 2008, 29, 429–438, doi:10.1016/j.tourman.2007.05.009.                                                                                                       |
| Case 19 | Meade, L.; Sarkis, J. Strategic Analysis of Logistics and Supply Chain Management Systems Using the Analytical Network Process. <i>Transportation Research Part E: Logistics and Transportation Review</i> 1998, 34E, 201–215, doi:10.1016/S1366-5545(98)00012-X.                                   |
| Case 20 | Gencer, C.; Gürpınar, D. Analytic Network Process in Supplier Selection: A Case Study in an Electronic Firm. <i>Applied Mathematical Modelling</i> 2007, 31, 2475–2486, doi:10.1016/j.apm.2006.10.002.                                                                                              |
| Case 21 | Bayazit, O. Use of Analytic Network Process in Vendor Selection Decisions. <i>Benchmarking</i> 2006, 13, 566–579, doi:10.1108/14635770610690410.                                                                                                                                                    |
| Case 22 | Neaupane, K.M.; Piantanakulchai, M. Analytic Network Process Model for Landslide Hazard Zonation. <i>Engineering Geology</i> 2006, 85, 281–294, doi:10.1016/j.enggeo.2006.02.003.                                                                                                                   |
| Case 23 | Agarwal, A.; Shankar, R.; Tiwari, M.K. Modeling the Metrics of Lean, Agile and Leagile Supply Chain: An ANP-Based Approach. <i>European Journal of Operational Research</i> 2006, 173, 211–225, doi:10.1016/j.ejor.2004.12.005.                                                                     |
| Case 24 | Ravi, V.; Shankar, R.; Tiwari, M.K. Analyzing Alternatives in Reverse Logistics for End-of-Life Computers: ANP and Balanced Scorecard Approach. <i>Computers and Industrial Engineering</i> 2005, 48, 327–356, doi:10.1016/j.cie.2005.01.017.                                                       |
| Case 25 | Niemira, M.P.; Saaty, T.L. An Analytic Network Process Model for Financial-Crisis Forecasting. <i>International Journal of Forecasting</i> 2004, 20, 573–587, doi:10.1016/j.ijforecast.2003.09.013.                                                                                                 |
| Case 26 | Aktar Demirtas, E.; Ustun, O. Analytic Network Process and Multi-Period Goal Programming Integration in Purchasing Decisions. <i>Computers and Industrial Engineering</i> 2009, 56, 677–690, doi:10.1016/j.cie.2006.12.006.                                                                         |
| Case 27 | Akyildiz, B.; Kadaifci, C.; Topcu, I. A Decision Framework Proposal for Customer Order Prioritization: A Case Study for a Structural Steel Company. <i>International Journal of Production Economics</i> 2015, 169, 21–30, doi:10.1016/j.ijpe.2015.07.004.                                          |
| Case 28 | Guerrero-Baena, M.D.; Gómez-Limón, J.A.; Fruct, J.V. A Multicriteria Method for Environmental Management System Selection: An Intellectual Capital Approach. <i>Journal of Cleaner Production</i> 2015, 105, 428–437, doi:10.1016/j.jclepro.2014.07.079.                                            |
| Case 29 | Kwon, T.H.; Kwak, J.H.; Kim, K. A Study on the Establishment of Policies for the Activation of a Big Data Industry and Prioritization of Policies: Lessons from Korea. <i>Technological Forecasting and Social Change</i> 2015, 96, 144–152, doi:10.1016/j.techfore.2015.03.017.                    |
| Case 30 | Pan, J.N.; Nguyen, H.T.N. Achieving Customer Satisfaction through Product-Service Systems. <i>European Journal of Operational Research</i> 2015, 247, 179–190, doi:10.1016/j.ejor.2015.05.018.                                                                                                      |
| Case 31 | Molinos-Senante, M.; Gómez, T.; Caballero, R.; Hernández-Sancho, F.; Sala-Garrido, R. Assessment of Wastewater Treatment Alternatives for Small Communities: An Analytic Network Process Approach. <i>Science of the Total Environment</i> 2015, 532, 676–687, doi:10.1016/j.scitotenv.2015.06.059. |
| Case 32 | Hsueh, J.T.; Lin, C.Y. Constructing a Network Model to Rank the Optimal Strategy for Implementing the Sorting Process in Reverse Logistics: Case Study of Photovoltaic Industry. <i>Clean Technologies and Environmental Policy</i> 2015, 17, 155–174, doi:10.1007/s10098-014-0770-3.               |

| Case    | Reference                                                                                                                                                                                                                                                                               |
|---------|-----------------------------------------------------------------------------------------------------------------------------------------------------------------------------------------------------------------------------------------------------------------------------------------|
| Case 33 | Jaafari, A.; Najafi, A.; Melón, M.G. Decision-Making for the Selection of a Best Wood Extraction Method: An Analytic Network Process Approach. <i>Forest Policy and Economics</i> 2015, 50, 200–209, doi:10.1016/j.forpol.2014.09.010.                                                  |
| Case 34 | Kuo, T.C.; Hsu, C.W.; Li, J.Y. Developing a Green Supplier Selection Model by Using the DANP with VI-KOR. <i>Sustainability (Switzerland)</i> 2015, 7, 1661–1689, doi:10.3390/su7021661.                                                                                                |
| Case 35 | Ju, Y.; Wang, A.; You, T. Emergency Alternative Evaluation and Selection Based on ANP, DEMATEL, and TL-TOPSIS. <i>Natural Hazards</i> 2015, 75, 347–379, doi:10.1007/s11069-014-1077-8.                                                                                                 |
| Case 36 | Lu, M.T.; Hu, S.K.; Huang, L.H.; Tzeng, G.H. Evaluating the Implementation of Business-to-Business m-Commerce by SMEs Based on a New Hybrid MADM Model. <i>Management Decision</i> 2015, 53, 290–317, doi:10.1108/MD-01-2014-0012.                                                      |
| Case 37 | Chang, D.S.; Chen, S.H.; Hsu, C.W.; Hu, A.H.; Tzeng, G.H. Evaluation Framework for Alternative Fuel Vehicles: Sustainable Development Perspective. <i>Sustainability (Switzerland)</i> 2015, 7, 11570–11594, doi:10.3390/su70911570.                                                    |
| Case 38 | Chuang, H.M.; Lin, C.Y.; Chen, Y.S. Exploring the Triple Reciprocity Nature of Organizational Value Cocreation Behavior Using Multicriteria Decision Making Analysis. <i>Mathematical Problems in Engineering</i> 2015, 2015, doi:10.1155/2015/206312.                                  |
| Case 39 | Öztay, B.; Kaya, T.; Kahraman, C. Performance Comparison Based on Customer Relationship Management Using Analytic Network Process. <i>Expert Systems with Applications</i> 2011, 38, 9788–9798, doi:10.1016/j.eswa.2011.01.170.                                                         |
| Case 40 | Chen, J.K.; Chen, I.S. The Assessment of Intellectual Capital for the Information and Communication Technology Industry in Taiwan Applying a Hybrid MCDM Model. <i>European Journal of International Management</i> 2015, 9, 88–107, doi:10.1504/EJIM.2015.066673.                      |
| Case 41 | Dangol, R.; Bahl, M.; Karpak, B. Timing Cooperative Relationships with Sequential Capability Development Process to Reduce Capability Development Trade-Offs. <i>International Journal of Production Economics</i> 2015, 169, 179–189, doi:10.1016/j.ijpe.2015.07.014.                  |
| Case 42 | Lin, H.F.; Huang, Y.W. Using Analytic Network Process to Measure the Determinants of Low Cost Carriers Purchase Intentions: A Comparison of Potential and Current Customers. <i>Journal of Air Transport Management</i> 2015, 49, 9–16, doi:10.1016/j.jairtraman.2015.07.004.           |
| Case 43 | Montesinos-Valera, J.; Aragonés-Beltrán, P.; Pastor-Ferrando, J.P. Selection of Maintenance, Renewal and Improvement Projects in Rail Lines Using the Analytic Network Process. <i>Structure and Infrastructure Engineering</i> 2017, 13, 1476–1496, doi:10.1080/15732479.2017.1294189. |
| Case 44 | Montesinos-Valera, J.; Aragonés-Beltrán, P.; Pastor-Ferrando, J.P. Selection of Maintenance, Renewal and Improvement Projects in Rail Lines Using the Analytic Network Process. <i>Structure and Infrastructure Engineering</i> 2017, 13, 1476–1496, doi:10.1080/15732479.2017.1294189. |
| Case 45 | Montesinos-Valera, J.; Aragonés-Beltrán, P.; Pastor-Ferrando, J.P. Selection of Maintenance, Renewal and Improvement Projects in Rail Lines Using the Analytic Network Process. <i>Structure and Infrastructure Engineering</i> 2017, 13, 1476–1496, doi:10.1080/15732479.2017.1294189. |
